# Supplementary material for: Identification of Lung-Cancer-Related Genes with the Shortest Path Approach in a Protein-Protein Interaction Network
Source: Biomed Res Int. 2013 May 22;2013:267375. doi: 10.1155/2013/267375 (PMC3674655; doi:10.1155/2013/267375)
Supplement: Supplementary file 1 — Additional file S1: This file contains two sheets. The first one shows 54 NSCLC related genes compiled from KEGG and corresponding Ensembl protein ID. The second one shows 84 SCLC related genes compiled from KEGG and corresponding Ensembl protein ID. Additional file S2: This file contains four sheets. The first one shows the 1918 overexpressed probes in NSCLC compared with normal tissues identified from gene expression array GSE40275. The second one shows the 2243 downexpressed probes in NSCLC. The third one shows the 819 overexpressed probes in SCLC. The fourth one shows the 820 downexpressed probes in SCLC. Additional file S3: This file contains five gene sets. The first one is the total 1825 differentially expressed NSCLC genes corresponding to the differentially expressed probes listed in Additional file S2. The second one is the total 1063 SCLC differentially expressed genes corresponding to the differentially expressed probes listed in Additional file S2. The third one is the 25 NSCLC shortest path genes. The fourth one is the 38 SCLC shortest path genes. The fifth one is the 742 cancer genes. Additional file S4: 1711 shortest paths between 54 NSCLC genes and 3916 shortest paths between 84 SCLC genes. Additional file S5: This file contains two sheets. The first one shows the 114 NSCLC shortest path genes with p-value. The second one shows the 161 SCLC shortest path genes with p-value. Additional file S6: This file contains two sheets. The first one shows the GO enrichment result of 25 NSCLC shortest path genes. The second one shows the GO enrichment result of 38 SCLC shortest path genes. [file 267375.f1.zip]

Archive with 7 entries (6 files):
- Additional file/Additional file S1.xlsx
- Additional file/Additional file S2.xlsx
- Additional file/Additional file S3.xlsx
- Additional file/Additional file S4.docx
- Additional file/Additional file S5.xlsx
- Additional file/Additional file S6.xlsx
- Additional file/
