# Supplementary material for: Identification of Lung-Cancer-Related Genes with the Shortest Path Approach in a Protein-Protein Interaction Network
Source: Biomed Res Int. 2013 May 22;2013:267375. doi: 10.1155/2013/267375 (PMC3674655; doi:10.1155/2013/267375)
Supplement: Supplementary file 1 — Additional file S1: This file contains two sheets. The first one shows 54 NSCLC related genes compiled from KEGG and corresponding Ensembl protein ID. The second one shows 84 SCLC related genes compiled from KEGG and corresponding Ensembl protein ID. Additional file S2: This file contains four sheets. The first one shows the 1918 overexpressed probes in NSCLC compared with normal tissues identified from gene expression array GSE40275. The second one shows the 2243 downexpressed probes in NSCLC. The third one shows the 819 overexpressed probes in SCLC. The fourth one shows the 820 downexpressed probes in SCLC. Additional file S3: This file contains five gene sets. The first one is the total 1825 differentially expressed NSCLC genes corresponding to the differentially expressed probes listed in Additional file S2. The second one is the total 1063 SCLC differentially expressed genes corresponding to the differentially expressed probes listed in Additional file S2. The third one is the 25 NSCLC shortest path genes. The fourth one is the 38 SCLC shortest path genes. The fifth one is the 742 cancer genes. Additional file S4: 1711 shortest paths between 54 NSCLC genes and 3916 shortest paths between 84 SCLC genes. Additional file S5: This file contains two sheets. The first one shows the 114 NSCLC shortest path genes with p-value. The second one shows the 161 SCLC shortest path genes with p-value. Additional file S6: This file contains two sheets. The first one shows the GO enrichment result of 25 NSCLC shortest path genes. The second one shows the GO enrichment result of 38 SCLC shortest path genes. [file 267375.f1.zip › Additional file/Additional file S1.xlsx]

## Sheet: NSCLC
gene symbol	Ensembl protein ID
AKT1	ENSP00000270202
AKT2	ENSP00000375892
AKT3	ENSP00000263826
ARAF	ENSP00000366244
BAD	ENSP00000309103
BRAF	ENSP00000288602
CASP9	ENSP00000330237
CCND1	ENSP00000227507
CDK4	ENSP00000257904
CDK6	ENSP00000265734
CDKN2A	ENSP00000355153
E2F1	ENSP00000345571
E2F2	ENSP00000355249
E2F3	ENSP00000262904
EGF	ENSP00000265171
EGFR	ENSP00000275493
ERBB2	ENSP00000269571
FHIT	ENSP00000342087
FOXO3	ENSP00000339527
GRB2	ENSP00000339007
HRAS	ENSP00000309845
KRAS	ENSP00000256078
MAP2K1	ENSP00000302486
MAP2K2	ENSP00000262948
MAPK1	ENSP00000215832
MAPK3	ENSP00000263025
NRAS	ENSP00000358548
PDPK1	ENSP00000344220
PIK3CA	ENSP00000263967
PIK3CB	ENSP00000289153
PIK3CD	ENSP00000366563
PIK3CG	ENSP00000352121
PIK3R1	ENSP00000274335
PIK3R2	ENSP00000222254
PIK3R3	ENSP00000262741
PIK3R5	ENSP00000269300
PLCG1	ENSP00000244007
PLCG2	ENSP00000352336
PRKCA	ENSP00000284384
PRKCB	ENSP00000305355
PRKCG	ENSP00000263431
RAF1	ENSP00000251849
RARB	ENSP00000332296
RASSF1	ENSP00000349547
RASSF5	ENSP00000347443
RB1	ENSP00000267163
RXRA	ENSP00000419692
RXRB	ENSP00000363812,ENSP00000372703,ENSP00000393286,ENSP00000393870,ENSP00000400104,ENSP00000402590
RXRG	ENSP00000352900
SOS1	ENSP00000384675
SOS2	ENSP00000216373
STK4	ENSP00000361892
TGFA	ENSP00000295400
TP53	ENSP00000269305

## Sheet: SCLC
gene symbol	Ensembl protein ID
AKT1	ENSP00000270202
AKT2	ENSP00000375892
AKT3	ENSP00000263826
APAF1	ENSP00000353059
BCL2	ENSP00000329623
BCL2L1	ENSP00000302564
BIRC2	ENSP00000227758
BIRC3	ENSP00000263464
CASP9	ENSP00000330237
CCND1	ENSP00000227507
CCNE1	ENSP00000262643
CCNE2	ENSP00000309181
CDK2	ENSP00000266970
CDK4	ENSP00000257904
CDK6	ENSP00000265734
CDKN1B	ENSP00000228872
CDKN2B	ENSP00000276925
CHUK	ENSP00000359424
CKS1B	ENSP00000311083
COL4A1	ENSP00000364979
COL4A2	ENSP00000353654
COL4A4	ENSP00000379866
COL4A6	ENSP00000361290
CYCS	ENSP00000307786
E2F1	ENSP00000345571
E2F2	ENSP00000355249
E2F3	ENSP00000262904
FHIT	ENSP00000342087
FN1	ENSP00000346839
IKBKB	ENSP00000339151
IKBKG	ENSP00000358622
ITGA2	ENSP00000296585
ITGA2B	ENSP00000262407
ITGA3	ENSP00000007722
ITGA6	ENSP00000386896
ITGAV	ENSP00000261023
ITGB1	ENSP00000364094
LAMA1	ENSP00000374309
LAMA2	ENSP00000400365
LAMA3	ENSP00000324532
LAMA4	ENSP00000230538
LAMA5	ENSP00000252999
LAMB1	ENSP00000222399
LAMB2	ENSP00000307156
LAMB3	ENSP00000348384
LAMB4	ENSP00000205386
LAMC1	ENSP00000258341
LAMC2	ENSP00000264144
LAMC3	ENSP00000354360
MAX	ENSP00000351490
MYC	ENSP00000367207
NFKB1	ENSP00000226574
NFKBIA	ENSP00000216797
NOS2	ENSP00000305638,ENSP00000327251
PIAS1	ENSP00000249636
PIAS2	ENSP00000381648
PIAS3	ENSP00000376765
PIAS4	ENSP00000262971
PIK3CA	ENSP00000263967
PIK3CB	ENSP00000289153
PIK3CD	ENSP00000366563
PIK3CG	ENSP00000352121
PIK3R1	ENSP00000274335
PIK3R2	ENSP00000222254
PIK3R3	ENSP00000262741
PIK3R5	ENSP00000269300
PTEN	ENSP00000361021
PTGS2	ENSP00000356438
PTK2	ENSP00000341189
RARB	ENSP00000332296
RB1	ENSP00000267163
RELA	ENSP00000384273
RXRA	ENSP00000419692
RXRB	ENSP00000363812,ENSP00000372703,ENSP00000393286,ENSP00000393870,ENSP00000400104,ENSP00000402590
RXRG	ENSP00000352900
SKP2	ENSP00000274255
TP53	ENSP00000269305
TRAF1	ENSP00000362994
TRAF2	ENSP00000247668
TRAF3	ENSP00000332468
TRAF4	ENSP00000262395
TRAF5	ENSP00000261464
XIAP	ENSP00000347858
