# Supplementary material for: Identification of Lung-Cancer-Related Genes with the Shortest Path Approach in a Protein-Protein Interaction Network
Source: Biomed Res Int. 2013 May 22;2013:267375. doi: 10.1155/2013/267375 (PMC3674655; doi:10.1155/2013/267375)
Supplement: Supplementary file 1 — Additional file S1: This file contains two sheets. The first one shows 54 NSCLC related genes compiled from KEGG and corresponding Ensembl protein ID. The second one shows 84 SCLC related genes compiled from KEGG and corresponding Ensembl protein ID. Additional file S2: This file contains four sheets. The first one shows the 1918 overexpressed probes in NSCLC compared with normal tissues identified from gene expression array GSE40275. The second one shows the 2243 downexpressed probes in NSCLC. The third one shows the 819 overexpressed probes in SCLC. The fourth one shows the 820 downexpressed probes in SCLC. Additional file S3: This file contains five gene sets. The first one is the total 1825 differentially expressed NSCLC genes corresponding to the differentially expressed probes listed in Additional file S2. The second one is the total 1063 SCLC differentially expressed genes corresponding to the differentially expressed probes listed in Additional file S2. The third one is the 25 NSCLC shortest path genes. The fourth one is the 38 SCLC shortest path genes. The fifth one is the 742 cancer genes. Additional file S4: 1711 shortest paths between 54 NSCLC genes and 3916 shortest paths between 84 SCLC genes. Additional file S5: This file contains two sheets. The first one shows the 114 NSCLC shortest path genes with p-value. The second one shows the 161 SCLC shortest path genes with p-value. Additional file S6: This file contains two sheets. The first one shows the GO enrichment result of 25 NSCLC shortest path genes. The second one shows the GO enrichment result of 38 SCLC shortest path genes. [file 267375.f1.zip › Additional file/Additional file S2.xlsx]

## Sheet: NSCLC up
order	Row	Gene ID	Gene Name	Score(d)	Numerator(r)	Denominator(s+s0)	Fold Change	q-value(%)	localfdr(%)
1	23700	NM_001026_at	23699	29.69	3.95233	0.13312	15.48	0	0
2	38239	NM_033022_at	38238	29.69	3.95233	0.13312	15.48	0	0
3	21703	NM_000993_at	21702	28.3453	3.64296	0.128521	12.4923	0	0
4	7183	4084137_at	7182	28.3124	6.47639	0.228748	89.0405	0	0
5	23775	NM_001030_at	23774	27.6744	5.25482	0.18988	38.182	0	0.00304079
6	21696	NM_000986_at	21695	23.5331	3.8306	0.162775	14.2274	0	0.0445384
7	30115	NM_006304_at	30114	21.2735	3.43676	0.161551	10.8285	0	0.0579314
8	7582	4085743_at	7581	21.2473	5.43799	0.255938	43.3509	0	0.0578727
9	48480	XM_001133991_at	48479	20.3035	3.93355	0.193737	15.2797	0	0.0497443
10	48528	XM_001134140_at	48527	20.3035	3.93355	0.193737	15.2797	0	0.0497443
11	15841	4117279_at	15840	20.2591	3.80244	0.187691	13.9524	0	0.0490261
12	49883	XM_929918_at	49882	19.6962	3.68838	0.187264	12.8918	0	0.0366188
13	51107	XM_939878_at	51106	19.6962	3.68838	0.187264	12.8918	0	0.0366188
14	35809	NM_021824_at	35808	19.487	3.29547	0.169111	9.81826	0	0.0302679
15	52913	XR_015992_at	52912	19.3296	4.08475	0.211321	16.9681	0	0.0247916
16	31199	NM_012207_at	31198	19.2104	3.91911	0.20401	15.1275	0	0.020227
17	2917	4067477_at	2916	19.1777	6.3646	0.331874	82.4015	0	0.0189108
18	35757	NM_021644_at	35756	18.9321	3.923	0.207214	15.1685	0	0.00807234
19	13630	4108911_at	13629	18.8521	4.17088	0.221242	18.012	0	0.00416759
20	28493	NM_004541_at	28492	18.6283	3.43836	0.184577	10.8405	0	0
21	30625	NM_006852_at	30624	18.5761	4.20268	0.226241	18.4133	0	0
22	23938	NM_001033505_at	23937	18.3936	3.99826	0.217372	15.9807	0	0
23	29269	NM_005381_at	29268	18.2062	3.26379	0.179268	9.60501	0	0
24	4092	4071943_at	4091	18.1497	5.46963	0.301361	44.312	0	0
25	20722	4135991_at	20721	18.1216	4.92236	0.271629	30.3234	0	0
26	23939	NM_001033506_at	23938	18.0086	3.87311	0.21507	14.6528	0	0
27	37250	NM_030917_at	37249	17.8309	2.816	0.157928	7.04208	0	0
28	34544	NM_018473_at	34543	17.8108	3.91973	0.220076	15.1341	0	0
29	52946	XR_016026_at	52945	17.8055	2.98165	0.167457	7.89889	0	0
30	52970	XR_016050_at	52969	17.8055	2.98165	0.167457	7.89889	0	0
31	34338	NM_018237_at	34337	17.5922	2.58638	0.147018	6.00589	0	0
32	15017	4114092_at	15016	17.4745	3.83268	0.21933	14.2479	0	0
33	39682	NM_138792_at	39681	17.4289	3.70033	0.21231	12.999	0	0
34	45423	XM_001126174_at	45422	17.3665	4.2827	0.246607	19.4636	0	0
35	46848	XM_001129893_at	46847	17.3665	4.2827	0.246607	19.4636	0	0
36	43297	NM_194283_at	43296	17.1794	3.92218	0.228307	15.1598	0	0
37	53606	XR_016760_at	53605	17.1742	2.0583	0.119848	4.16494	0	0
38	55238	XR_018536_at	55237	17.1742	2.0583	0.119848	4.16494	0	0
39	23518	NM_001023_at	23517	17.1031	2.81096	0.164353	7.01751	0	0
40	22958	NM_001010_at	22957	17.0529	2.9227	0.17139	7.58264	0	0
41	16489	4119618_at	16488	17.0301	2.85818	0.167831	7.25098	0	0
42	23025	NM_001012339_at	23024	16.8417	3.89245	0.23112	14.8506	0	0
43	46579	XM_001129189_at	46578	16.3767	2.89909	0.177025	7.45957	0	0
44	47242	XM_001130938_at	47241	16.3767	2.89909	0.177025	7.45957	0	0
45	48475	XM_001133976_at	48474	16.3767	2.89909	0.177025	7.45957	0	0
46	23047	NM_001012456_at	23046	16.3684	3.9389	0.24064	15.3365	0	0
47	31866	NM_014302_at	31865	16.3684	3.9389	0.24064	15.3365	0	0
48	47290	XM_001131054_at	47289	16.2878	2.53108	0.155397	5.78003	0	0
49	48061	XM_001132882_at	48060	16.2878	2.53108	0.155397	5.78003	0	0
50	30705	NM_006937_at	30704	16.2614	2.55896	0.157364	5.89283	0	0
51	33492	NM_016497_at	33491	16.2578	3.50399	0.215526	11.345	0	0
52	5705	4078385_at	5704	16.21	3.33334	0.205634	10.0794	0	0
53	29470	NM_005594_at	29469	16.1876	2.58328	0.159584	5.99301	0	0
54	30206	NM_006401_at	30205	16.1788	3.39911	0.210096	10.5496	0	0
55	44753	NR_001457_at	44752	16.1465	3.77297	0.233671	13.6703	0	0
56	29518	NM_005645_at	29517	16.1434	3.93657	0.243849	15.3118	0	0
57	19214	4130186_at	19213	16.0751	3.25815	0.202683	9.56754	0	0
58	18245	4126524_at	18244	16.0207	4.04244	0.252326	16.4776	0	0
59	1013	4060035_at	1012	15.9068	3.44656	0.216673	10.9023	0	0
60	12164	4103329_at	12163	15.906	1.83696	0.115488	3.57256	0	0
61	32107	NM_014597_at	32106	15.8559	3.2545	0.205255	9.54337	0	0
62	31932	NM_014377_at	31931	15.8445	3.37554	0.213041	10.3786	0	0
63	8720	4090205_at	8719	15.7916	3.61518	0.228931	12.254	0	0
64	32464	NM_015014_at	32463	15.7593	3.01113	0.191071	8.06198	0	0
65	13603	4108789_at	13602	15.7474	5.1167	0.324925	34.6962	0	0
66	50329	XM_935293_at	50328	15.7309	2.81948	0.179232	7.05909	0	0
67	51837	XM_943868_at	51836	15.7309	2.81948	0.179232	7.05909	0	0
68	29521	NM_005648_at	29520	15.6871	3.40573	0.217104	10.5981	0	0
69	29648	NM_005791_at	29647	15.6454	2.82725	0.180709	7.09722	0	0
70	12945	4106275_at	12944	15.5821	4.54996	0.291999	23.4247	0	0
71	37664	NM_032178_at	37663	15.5074	2.2722	0.146524	4.83059	0	0
72	37869	NM_032466_at	37868	15.5053	3.80589	0.245457	13.9858	0	0
73	49549	XM_926811_at	49548	15.4879	2.7	0.17433	6.498	0	0
74	29191	NM_005292_at	29190	15.4784	3.37232	0.217873	10.3555	0	0
75	45687	XM_001126849_at	45686	15.4576	5.01446	0.324402	32.3224	0	0
76	48561	XM_001134250_at	48560	15.4576	5.01446	0.324402	32.3224	0	0
77	30278	NM_006476_at	30277	15.4365	2.67043	0.172994	6.36621	0	0
78	33276	NM_016207_at	33275	15.4128	3.59838	0.233467	12.1122	0	0
79	24531	NM_001042384_at	24530	15.4008	2.97151	0.192945	7.84357	0	0
80	30178	NM_006370_at	30177	15.3721	2.96564	0.192924	7.81174	0	0
81	5704	4078378_at	5703	15.3698	5.3519	0.348208	40.8396	0	0
82	37448	NM_031480_at	37447	15.366	3.46369	0.225412	11.0325	0	0
83	37871	NM_032468_at	37870	15.3633	3.74193	0.243562	13.3793	0	0
84	26883	NM_002806_at	26882	15.3025	2.90905	0.190102	7.51124	0	0
85	53654	XR_016809_at	53653	15.2856	2.29402	0.150077	4.90422	0	0
86	55609	XR_018917_at	55608	15.2856	2.29402	0.150077	4.90422	0	0
87	44896	NR_002595_at	44895	15.2506	2.42146	0.158778	5.35712	0	0
88	30538	NM_006761_at	30537	15.1971	2.74636	0.180716	6.71023	0	0
89	40621	NM_152318_at	40620	15.092	2.82222	0.187001	7.07248	0	0
90	38753	NM_053035_at	38752	15.0848	4.08164	0.27058	16.9315	0	0
91	24536	NM_001042400_at	24535	15.0619	2.78051	0.184605	6.87095	0	0
92	34103	NM_017969_at	34102	15.0586	2.82262	0.187442	7.07444	0	0
93	52551	XR_015597_at	52550	15.0345	3.14048	0.208884	8.81817	0	0
94	52591	XR_015640_at	52590	15.0345	3.14048	0.208884	8.81817	0	0
95	4333	4072834_at	4332	15.0248	2.0689	0.137699	4.19566	0	0
96	51902	XM_944244_at	51901	14.969	3.38262	0.225976	10.4297	0	0
97	27202	NM_003142_at	27201	14.9228	3.3321	0.223289	10.0708	0	0
98	11786	4101757_at	11785	14.9226	3.41311	0.228721	10.6524	0	0
99	24530	NM_001042383_at	24529	14.9006	2.65815	0.178392	6.31221	0	0
100	33170	NM_016071_at	33169	14.8512	3.78106	0.254597	13.7471	0	0
101	44898	NR_002599_at	44897	14.838	3.25697	0.219502	9.55973	0	0
102	49552	XM_926824_at	49551	14.8351	2.95746	0.199356	7.76755	0	0
103	50349	XM_935648_at	50348	14.8351	2.95746	0.199356	7.76755	0	0
104	50561	XM_937041_at	50560	14.8351	2.95746	0.199356	7.76755	0	0
105	26417	NM_002300_at	26416	14.826	3.03078	0.204424	8.17252	0	0
106	5813	4078831_at	5812	14.7844	3.68083	0.248968	12.8245	0	0
107	25920	NM_001780_at	25919	14.7319	2.35825	0.160078	5.12749	0	0
108	43100	NM_182810_at	43099	14.6779	2.59875	0.177052	6.0576	0	0
109	27335	NM_003299_at	27334	14.653	2.6596	0.181506	6.31859	0	0
110	48011	XM_001132721_at	48010	14.6388	3.64755	0.24917	12.5321	0	0
111	24793	NM_001067_at	24792	14.59	4.61262	0.316149	24.4646	0	0
112	23389	NM_001017928_at	23388	14.583	3.65674	0.250753	12.6121	0	0
113	11238	4099731_at	11237	14.5807	3.69637	0.253511	12.9634	0	0
114	1327	4061163_at	1326	14.5786	3.39054	0.23257	10.4871	0	0
115	25006	NM_001079862_at	25005	14.5739	2.84408	0.195148	7.18048	0	0
116	29661	NM_005805_at	29660	14.5354	3.15139	0.216808	8.88508	0	0
117	54112	XR_017302_at	54111	14.5345	1.88202	0.129486	3.6859	0	0
118	55064	XR_018358_at	55063	14.5345	1.88202	0.129486	3.6859	0	0
119	33949	NM_017785_at	33948	14.5188	3.02644	0.208449	8.14798	0	0
120	25962	NM_001826_at	25961	14.5106	4.45541	0.307045	21.9387	0	0
121	16693	4120453_at	16692	14.5053	3.53662	0.243816	11.6046	0	0
122	34542	NM_018471_at	34541	14.4924	2.74799	0.189616	6.7178	0	0
123	494	4058114_at	493	14.4533	3.3805	0.233892	10.4144	0	0
124	50262	XM_934008_at	50261	14.4471	3.25263	0.22514	9.53105	0	0
125	29771	NM_005926_at	29770	14.439	3.01507	0.208815	8.084	0	0
126	22713	NM_001008396_at	22712	14.4353	3.50251	0.242636	11.3334	0	0
127	50144	XM_932569_at	50143	14.4123	2.18188	0.15139	4.53745	0	0
128	51986	XM_944824_at	51985	14.4123	2.18188	0.15139	4.53745	0	0
129	22772	NM_001008726_at	22771	14.3962	2.69421	0.187147	6.47199	0	0
130	45334	XM_001125938_at	45333	14.3866	2.58311	0.179549	5.99229	0	0
131	1160	4060533_at	1159	14.386	3.60167	0.250359	12.1398	0	0
132	9972	4094922_at	9971	14.3595	3.37937	0.23534	10.4062	0	0
133	31691	NM_014034_at	31690	14.3507	3.54984	0.247364	11.7114	0	0
134	30833	NM_007086_at	30832	14.3358	3.44599	0.240377	10.898	0	0
135	8913	4090933_at	8912	14.2924	4.79641	0.335591	27.7884	0	0
136	3175	4068397_at	3174	14.29	4.45748	0.31193	21.9702	0	0
137	26880	NM_002803_at	26879	14.2535	2.70763	0.189962	6.53246	0	0
138	28705	NM_004768_at	28704	14.2378	2.3558	0.165461	5.11878	0	0
139	41108	NM_153005_at	41107	14.2282	2.96023	0.208054	7.78246	0	0
140	36064	NM_022375_at	36063	14.2112	3.10189	0.218271	8.58544	0	0
141	40394	NM_145859_at	40393	14.1753	3.7844	0.266972	13.779	0	0
142	37815	NM_032390_at	37814	14.1695	2.9235	0.206324	7.58687	0	0
143	33247	NM_016167_at	33246	14.1458	2.82085	0.199413	7.06577	0	0
144	21706	NM_000996_at	21705	14.1064	2.20349	0.156204	4.60591	0	0
145	23788	NM_001031684_at	23787	14.0983	2.6275	0.18637	6.17953	0	0
146	29242	NM_005347_at	29241	14.088	2.58648	0.183594	6.00631	0	0
147	25770	NM_001625_at	25769	14.0681	2.82898	0.201091	7.10571	0	0
148	37022	NM_025180_at	37021	14.0616	2.35268	0.167312	5.10772	0	0
149	14232	4111258_at	14231	14.035	2.61904	0.186608	6.14342	0	0
150	34594	NM_018648_at	34593	14.0292	2.39218	0.170514	5.24948	0	0
151	2593	4066138_at	2592	14.0279	3.09195	0.220414	8.52647	0	0
152	38521	NM_033486_at	38520	13.954	2.7049	0.193845	6.52014	0	0
153	38522	NM_033487_at	38521	13.954	2.7049	0.193845	6.52014	0	0
154	38523	NM_033488_at	38522	13.954	2.7049	0.193845	6.52014	0	0
155	38524	NM_033489_at	38523	13.954	2.7049	0.193845	6.52014	0	0
156	21981	NM_001002844_at	21980	13.9135	2.60299	0.187084	6.07545	0	0
157	26277	NM_002156_at	26276	13.9004	3.1574	0.227144	8.92222	0	0
158	38525	NM_033492_at	38524	13.8893	2.52017	0.181447	5.73648	0	0
159	38526	NM_033493_at	38525	13.8893	2.52017	0.181447	5.73648	0	0
160	28135	NM_004161_at	28134	13.8839	2.50134	0.180161	5.6621	0	0
161	8346	4088691_at	8345	13.8828	2.88183	0.207583	7.37083	0	0
162	23330	NM_001015_at	23329	13.8739	2.03504	0.146681	4.09833	0	0
163	40182	NM_145112_at	40181	13.8452	2.21726	0.160146	4.65009	0	0
164	24350	NM_001040034_at	24349	13.7986	2.2466	0.162813	4.74562	0	0
165	12773	4105596_at	12772	13.7918	1.79911	0.130448	3.48006	0	0
166	37750	NM_032314_at	37749	13.7918	3.17279	0.23005	9.01787	0	0
167	33354	NM_016306_at	33353	13.7825	3.34504	0.242702	10.1615	0	0
168	30764	NM_007010_at	30763	13.7769	2.27213	0.164924	4.83036	0	0
169	40605	NM_152300_at	40604	13.7769	2.27213	0.164924	4.83036	0	0
170	43954	NM_199440_at	43953	13.7681	3.12761	0.227163	8.73985	0	0
171	28652	NM_004713_at	28651	13.7608	2.60482	0.189293	6.08315	0	0
172	25552	NM_001355_at	25551	13.7529	3.34471	0.243201	10.1591	0	0
173	30143	NM_006335_at	30142	13.7495	3.23128	0.235011	9.39101	0	0
174	38170	NM_032936_at	38169	13.7484	3.0757	0.223713	8.431	0	0
175	52942	XR_016022_at	52941	13.7156	2.16642	0.157953	4.48907	0	0
176	52974	XR_016054_at	52973	13.7156	2.16642	0.157953	4.48907	0	0
177	13926	4110006_at	13925	13.7068	3.66155	0.267134	12.6543	0	0
178	48309	XM_001133546_at	48308	13.7049	2.1485	0.156769	4.43366	0	0
179	32589	NM_015172_at	32588	13.6693	2.35085	0.171981	5.10125	0	0
180	38551	NM_033534_at	38550	13.6537	2.90871	0.213034	7.50944	0	0
181	14813	4113409_at	14812	13.6477	2.70093	0.197905	6.50222	0	0
182	43542	NM_198426_at	43541	13.6363	2.18419	0.160175	4.54471	0	0
183	25007	NM_001079863_at	25006	13.6062	2.6683	0.19611	6.35682	0	0
184	27347	NM_003314_at	27346	13.5992	2.67706	0.196853	6.3955	0	0
185	19693	4132037_at	19692	13.5973	1.60022	0.117687	3.0319	0	0
186	26617	NM_002524_at	26616	13.5964	2.50868	0.184511	5.69099	0	0
187	37253	NM_030920_at	37252	13.5811	3.72343	0.274162	13.2089	0	0
188	32002	NM_014453_at	32001	13.5781	2.17281	0.160023	4.509	0	0
189	35033	NM_020192_at	35032	13.5512	3.42917	0.253052	10.7717	0	0
190	33426	NM_016403_at	33425	13.5383	3.05647	0.225764	8.31932	0	0
191	5195	4076266_at	5194	13.5371	2.77444	0.20495	6.84209	0	0
192	643	4058656_at	642	13.5118	2.73001	0.202046	6.6346	0	0
193	33169	NM_016070_at	33168	13.5018	3.44871	0.255426	10.9186	0	0
194	21698	NM_000988_at	21697	13.484	2.56963	0.19057	5.93658	0	0
195	33424	NM_016400_at	33423	13.4765	2.04203	0.151525	4.11824	0	0
196	24418	NM_001040200_at	24417	13.4505	2.36898	0.176126	5.16574	0	0
197	35698	NM_021239_at	35697	13.4257	2.20451	0.164201	4.60916	0	0
198	33149	NM_016047_at	33148	13.3793	2.96418	0.221549	7.80382	0	0
199	30133	NM_006324_at	30132	13.3724	3.17428	0.237376	9.02722	0	0
200	22987	NM_001011670_at	22986	13.3706	3.03847	0.22725	8.21619	0	0
201	28824	NM_004894_at	28823	13.3612	2.74698	0.205594	6.71311	0	0
202	29508	NM_005633_at	29507	13.3587	2.55622	0.191352	5.88164	0	0
203	41138	NM_153182_at	41137	13.3553	2.21294	0.165698	4.6362	0	0
204	40183	NM_145113_at	40182	13.3312	2.23863	0.167924	4.71947	0	0
205	40318	NM_145644_at	40317	13.3074	2.8164	0.211642	7.04401	0	0
206	30261	NM_006459_at	30260	13.2989	3.27056	0.245927	9.6502	0	0
207	45098	NR_003036_at	45097	13.2772	3.45925	0.26054	10.9986	0	0
208	27904	NM_003908_at	27903	13.2742	2.81347	0.21195	7.02974	0	0
209	41112	NM_153013_at	41111	13.2659	2.59664	0.195739	6.04878	0	0
210	856	4059453_at	855	13.2564	2.35724	0.17782	5.12389	0	0
211	39007	NM_080666_at	39006	13.2513	2.48655	0.187646	5.60438	0	0
212	26252	NM_002129_at	26251	13.244	3.30026	0.249189	9.85094	0	0
213	25251	NM_001081550_at	25250	13.2353	2.17096	0.164028	4.50324	0	0
214	35200	NM_020449_at	35199	13.2353	2.17096	0.164028	4.50324	0	0
215	13351	4107809_at	13350	13.2331	4.55688	0.344354	23.5374	0	0
216	21586	NM_000867_at	21585	13.2286	2.94628	0.22272	7.70759	0	0
217	49522	XM_926528_at	49521	13.2183	2.13967	0.161872	4.40661	0	0
218	50568	XM_937069_at	50567	13.2183	2.13967	0.161872	4.40661	0	0
219	40395	NM_145860_at	40394	13.1952	3.65079	0.276675	12.5602	0	0
220	37881	NM_032485_at	37880	13.1935	2.78484	0.211076	6.89159	0	0
221	26259	NM_002137_at	26258	13.1761	2.25187	0.170906	4.763	0	0
222	34185	NM_018072_at	34184	13.1733	2.05086	0.155683	4.14354	0	0
223	27330	NM_003292_at	27329	13.165	2.78381	0.211455	6.88669	0	0
224	24431	NM_001040285_at	24430	13.163	2.26517	0.172086	4.8071	0	0
225	6343	4080942_at	6342	13.1583	3.16233	0.240331	8.95277	0	0
226	22984	NM_001011667_at	22983	13.1572	2.97646	0.226223	7.8705	0	0
227	22986	NM_001011669_at	22985	13.1572	2.97646	0.226223	7.8705	0	0
228	21697	NM_000987_at	21696	13.1552	2.75558	0.209467	6.75326	0	0
229	34537	NM_018464_at	34536	13.155	3.67744	0.279546	12.7944	0	0
230	32963	NM_015702_at	32962	13.1412	2.95257	0.22468	7.74125	0	0
231	3957	4071442_at	3956	13.1362	2.23782	0.170356	4.71685	0	0
232	26481	NM_002382_at	26480	13.1147	2.28579	0.174293	4.87632	0	0
233	43357	NM_197957_at	43356	13.0888	2.36536	0.180716	5.1528	0	0
234	43099	NM_182802_at	43098	13.0848	2.74992	0.210162	6.72681	0	0
235	31532	NM_013341_at	31531	13.0674	1.88927	0.144579	3.70449	0	0
236	28187	NM_004215_at	28186	13.0591	2.83425	0.217033	7.13173	0	0
237	26360	NM_002242_at	26359	13.0541	3.08876	0.236612	8.50764	0	0
238	23498	NM_001019_at	23497	13.0467	4.17629	0.320104	18.0796	0	0
239	47898	XM_001132436_at	47897	13.0465	2.40841	0.184601	5.30888	0	0
240	48865	XM_209695_at	48864	13.0433	2.04719	0.156952	4.13299	0	0
241	51560	XM_942126_at	51559	13.0433	2.04719	0.156952	4.13299	0	0
242	43559	NM_198450_at	43558	13.04	2.59483	0.19899	6.04117	0	0
243	33033	NM_015906_at	33032	13.0369	2.21707	0.170061	4.64949	0	0
244	45305	XM_001125873_at	45304	13.0338	4.19858	0.322129	18.3611	0	0
245	31441	NM_013235_at	31440	13.0293	2.61899	0.201008	6.14318	0	0
246	23127	NM_001012985_at	23126	13.0253	3.25091	0.249584	9.51967	0	0
247	34825	NM_019059_at	34824	13.0105	3.25314	0.25004	9.5344	0	0
248	31770	NM_014184_at	31769	13.0037	2.45226	0.188582	5.47274	0	0
249	29621	NM_005760_at	29620	12.9981	3.53663	0.272088	11.6047	0	0
250	24617	NM_001042533_at	24616	12.989	2.0954	0.161321	4.27346	0	0
251	38051	NM_032778_at	38050	12.989	2.0954	0.161321	4.27346	0	0
252	48761	XM_065899_at	48760	12.9622	2.62392	0.202428	6.16424	0	0
253	51491	XM_941747_at	51490	12.9622	2.62392	0.202428	6.16424	0	0
254	33133	NM_016028_at	33132	12.9605	2.32844	0.179657	5.02262	0	0
255	38125	NM_032860_at	38124	12.9382	3.05001	0.235737	8.28215	0	0
256	26865	NM_002787_at	26864	12.9362	2.61351	0.20203	6.11989	0	0
257	30437	NM_006649_at	30436	12.9329	2.17538	0.168205	4.51703	0	0
258	28265	NM_004298_at	28264	12.9252	2.4338	0.188299	5.40316	0	0
259	15484	4115912_at	15483	12.9206	1.76588	0.136672	3.40081	0	0
260	40944	NM_152716_at	40943	12.9202	2.47879	0.191853	5.57429	0	0
261	37688	NM_032226_at	37687	12.9171	2.88086	0.223027	7.36588	0	0
262	22993	NM_001011708_at	22992	12.9164	1.93252	0.149618	3.8172	0	0
263	37328	NM_031243_at	37327	12.9112	2.18113	0.168933	4.53508	0	0
264	38238	NM_033020_at	38237	12.9089	2.205	0.170813	4.61076	0	0
265	42812	NM_181781_at	42811	12.9055	2.27592	0.176353	4.84308	0	0
266	32244	NM_014753_at	32243	12.8846	1.95392	0.151648	3.87427	0	0
267	41396	NM_153826_at	41395	12.8752	2.55186	0.1982	5.86388	0	0
268	33031	NM_015904_at	33030	12.8729	2.68933	0.208915	6.45014	0	0
269	24430	NM_001040284_at	24429	12.8684	2.37936	0.184899	5.20307	0	0
270	40592	NM_152284_at	40591	12.8653	3.24325	0.252094	9.46928	0	0
271	21687	NM_000975_at	21686	12.8639	1.967	0.152908	3.90954	0	0
272	30550	NM_006773_at	30549	12.8634	2.6389	0.205147	6.22854	0	0
273	26888	NM_002811_at	26887	12.8445	2.13363	0.166113	4.38821	0	0
274	23601	NM_001024947_at	23600	12.8356	2.51845	0.196207	5.72965	0	0
275	49293	XM_495839_at	49292	12.8341	2.15562	0.16796	4.4556	0	0
276	51718	XM_943171_at	51717	12.8341	2.15562	0.16796	4.4556	0	0
277	41632	NM_172359_at	41631	12.8307	2.45377	0.191241	5.47846	0	0
278	33615	NM_016649_at	33614	12.8292	3.15701	0.246081	8.91981	0	0
279	41631	NM_172358_at	41630	12.8239	2.55003	0.19885	5.85648	0	0
280	43404	NM_198120_at	43403	12.8203	2.76035	0.215311	6.77561	0	0
281	11714	4101518_at	11713	12.8173	2.29764	0.179261	4.91653	0	0
282	34089	NM_017948_at	34088	12.8096	2.22576	0.173758	4.67759	0	0
283	49962	XM_930487_at	49961	12.7834	2.03933	0.15953	4.11055	0	0
284	51244	XM_940570_at	51243	12.7834	2.03933	0.15953	4.11055	0	0
285	35030	NM_020189_at	35029	12.7664	2.90758	0.227753	7.50358	0	0
286	26613	NM_002520_at	26612	12.7578	2.43648	0.190979	5.41321	0	0
287	43854	NM_199185_at	43853	12.7578	2.43648	0.190979	5.41321	0	0
288	41290	NM_153485_at	41289	12.7506	2.4035	0.188501	5.29084	0	0
289	32710	NM_015342_at	32709	12.7405	2.53606	0.199054	5.80001	0	0
290	3640	4070215_at	3639	12.7234	2.67986	0.210624	6.40793	0	0
291	33055	NM_015932_at	33054	12.7124	2.28533	0.179771	4.87477	0	0
292	41626	NM_172353_at	41625	12.7091	2.42432	0.190754	5.36775	0	0
293	28534	NM_004582_at	28533	12.6534	2.69767	0.213197	6.48753	0	0
294	26029	NM_001896_at	26028	12.6379	2.12507	0.16815	4.36224	0	0
295	50415	XM_936240_at	50414	12.6298	2.27641	0.180242	4.84472	0	0
296	37457	NM_031492_at	37456	12.6206	2.59748	0.205813	6.05229	0	0
297	24134	NM_001037738_at	24133	12.6163	2.49662	0.197888	5.64361	0	0
298	8990	4091227_at	8989	12.6067	2.02024	0.160251	4.05652	0	0
299	30413	NM_006625_at	30412	12.6038	2.33902	0.185581	5.05958	0	0
300	24107	NM_001037495_at	24106	12.6031	2.26913	0.180046	4.82031	0	0
301	27750	NM_003746_at	27749	12.6031	2.26913	0.180046	4.82031	0	0
302	44934	NR_002746_at	44933	12.6009	3.8112	0.302454	14.0374	0	0
303	37204	NM_030799_at	37203	12.5977	2.5253	0.200458	5.75695	0	0
304	25372	NM_001156_at	25371	12.5849	2.30609	0.183242	4.9454	0	0
305	34625	NM_018685_at	34624	12.5782	4.0455	0.321627	16.5126	0	0
306	32726	NM_015361_at	32725	12.5711	2.20746	0.175597	4.61862	0	0
307	44697	NR_000007_at	44696	12.5706	3.15791	0.251213	8.92537	0	0
308	36568	NM_024529_at	36567	12.5698	2.7121	0.215763	6.55273	0	0
309	12845	4105888_at	12844	12.5404	2.4854	0.198191	5.59991	0	0
310	41629	NM_172356_at	41628	12.5336	2.49326	0.198927	5.63049	0	0
311	20953	NM_000179_at	20952	12.5269	2.65805	0.212187	6.31181	0	0
312	5162	4076149_at	5161	12.5249	2.82923	0.225889	7.10695	0	0
313	28018	NM_004034_at	28017	12.5098	2.228	0.1781	4.68485	0	0
314	41623	NM_172350_at	41622	12.5097	2.38604	0.190735	5.22721	0	0
315	46189	XM_001128198_at	46188	12.4906	2.61628	0.209459	6.13167	0	0
316	45552	XM_001126494_at	45551	12.4884	2.50413	0.200517	5.67307	0	0
317	37991	NM_032632_at	37990	12.4565	2.45927	0.197428	5.4994	0	0
318	25560	NM_001363_at	25559	12.4476	2.93736	0.235979	7.6601	0	0
319	5940	4079367_at	5939	12.4439	4.13622	0.332389	17.5843	0	0
320	42322	NM_177952_at	42321	12.4338	2.82193	0.226956	7.07106	0	0
321	3506	4069656_at	3505	12.4139	2.70753	0.218105	6.53204	0	0
322	28027	NM_004044_at	28026	12.4102	2.69746	0.217359	6.48659	0	0
323	31699	NM_014044_at	31698	12.4053	2.16678	0.174666	4.4902	0	0
324	44078	NM_201595_at	44077	12.3973	2.55928	0.206438	5.89414	0	0
325	45156	NR_003148_at	45155	12.3972	1.89043	0.152488	3.70746	0	0
326	11225	4099683_at	11224	12.3755	3.45325	0.279038	10.953	0	0
327	15883	4117450_at	15882	12.3589	2.53716	0.20529	5.80446	0	0
328	53255	XR_016385_at	53254	12.3503	2.43644	0.197278	5.41303	0	0
329	9768	4094119_at	9767	12.3493	3.61543	0.292763	12.2562	0	0
330	31056	NM_007355_at	31055	12.3469	2.22696	0.180366	4.68147	0	0
331	41624	NM_172351_at	41623	12.3444	2.52096	0.20422	5.73964	0	0
332	27203	NM_003143_at	27202	12.3337	2.72909	0.221271	6.63035	0	0
333	25832	NM_001689_at	25831	12.326	2.34211	0.190014	5.07045	0	0
334	41633	NM_172360_at	41632	12.3166	2.39789	0.194687	5.27031	0	0
335	34190	NM_018077_at	34189	12.3028	2.04866	0.166519	4.13721	0	0
336	26488	NM_002389_at	26487	12.2918	2.45179	0.199465	5.47095	0	0
337	49666	XM_927887_at	49665	12.2874	2.9368	0.239009	7.65713	0	0
338	51418	XM_941403_at	51417	12.2874	2.9368	0.239009	7.65713	0	0
339	27858	NM_003858_at	27857	12.2852	2.41277	0.196397	5.32495	0	0
340	25461	NM_001254_at	25460	12.2816	3.49225	0.284347	11.2531	0	0
341	30317	NM_006519_at	30316	12.27	2.71392	0.221183	6.56103	0	0
342	48123	XM_001133051_at	48122	12.2386	2.59476	0.212015	6.0409	0	0
343	48127	XM_001133058_at	48126	12.2386	2.59476	0.212015	6.0409	0	0
344	33428	NM_016406_at	33427	12.2245	2.65449	0.217146	6.29625	0	0
345	6784	4082645_at	6783	12.2235	2.08947	0.170939	4.25591	0	0
346	27495	NM_003472_at	27494	12.223	2.63118	0.215265	6.19534	0	0
347	45155	NR_003144_at	45154	12.2088	2.54953	0.208827	5.85443	0	0
348	26962	NM_002887_at	26961	12.1984	2.36616	0.193973	5.15567	0	0
349	27602	NM_003590_at	27601	12.1902	2.24614	0.184258	4.74412	0	0
350	28954	NM_005034_at	28953	12.1825	3.1882	0.261703	9.1147	0	0
351	28114	NM_004134_at	28113	12.1703	2.48681	0.204335	5.60538	0	0
352	34641	NM_018703_at	34640	12.1674	1.8733	0.153961	3.66369	0	0
353	19076	4129638_at	19075	12.1599	3.06639	0.252173	8.37676	0	0
354	33596	NM_016622_at	33595	12.1587	2.6204	0.215516	6.14921	0	0
355	45483	XM_001126335_at	45482	12.1556	2.02305	0.166429	4.06442	0	0
356	31754	NM_014167_at	31753	12.1478	3.22205	0.265236	9.33109	0	0
357	41628	NM_172355_at	41627	12.1416	2.46631	0.203129	5.52627	0	0
358	22985	NM_001011668_at	22984	12.1365	2.68217	0.221	6.4182	0	0
359	36480	NM_024300_at	36479	12.1365	2.68217	0.221	6.4182	0	0
360	18	4056299_at	17	12.1316	3.45849	0.285082	10.9928	0	0
361	41634	NM_172361_at	41633	12.125	2.36563	0.195103	5.15379	0	0
362	32403	NM_014937_at	32402	12.1249	2.54485	0.209885	5.83546	0	0
363	21699	NM_000989_at	21698	12.1223	1.89059	0.15596	3.70788	0	0
364	43474	NM_198261_at	43473	12.1202	2.32399	0.191745	5.00717	0	0
365	43475	NM_198262_at	43474	12.1202	2.32399	0.191745	5.00717	0	0
366	28812	NM_004882_at	28811	12.1189	2.47301	0.204062	5.55201	0	0
367	10719	4097730_at	10718	12.1076	3.92295	0.324007	15.1679	0	0
368	23864	NM_001032288_at	23863	12.0954	2.5306	0.20922	5.77814	0	0
369	39252	NM_131916_at	39251	12.092	2.15921	0.178565	4.46671	0	0
370	35953	NM_022091_at	35952	12.0755	2.70953	0.224382	6.54106	0	0
371	33903	NM_017735_at	33902	12.0739	1.89207	0.156707	3.71167	0	0
372	8487	4089336_at	8486	12.0649	3.81491	0.316199	14.0735	0	0
373	21912	NM_001001_at	21911	12.0608	2.31677	0.192091	4.98216	0	0
374	29020	NM_005105_at	29019	12.0586	2.94443	0.244176	7.6977	0	0
375	26625	NM_002532_at	26624	12.0574	2.93414	0.243348	7.64301	0	0
376	28549	NM_004597_at	28548	12.0395	2.54586	0.211459	5.83955	0	0
377	4467	4073403_at	4466	12.0378	2.7639	0.229602	6.7923	0	0
378	34073	NM_017924_at	34072	12.0154	2.51951	0.209691	5.73388	0	0
379	32511	NM_015072_at	32510	12.011	2.18736	0.182113	4.5547	0	0
380	41423	NM_170665_at	41422	12.0102	2.32729	0.193776	5.0186	0	0
381	9230	4092110_at	9229	12.0016	3.16227	0.263488	8.95238	0	0
382	26899	NM_002822_at	26898	11.9929	3.42109	0.28526	10.7115	0	0
383	28694	NM_004757_at	28693	11.9734	2.22715	0.186007	4.68208	0	0
384	23331	NM_001016_at	23330	11.9709	2.5472	0.212782	5.84497	0	0
385	15365	4115474_at	15364	11.97	2.55177	0.213181	5.86352	0	0
386	24635	NM_001042572_at	24634	11.9628	2.32038	0.193965	4.99463	0	0
387	37716	NM_032273_at	37715	11.9591	2.5457	0.212867	5.83892	0	0
388	23561	NM_001024649_at	23560	11.9555	2.12591	0.177819	4.36478	0	0
389	17628	4124246_at	17627	11.9529	4.28429	0.358432	19.485	0	0
390	35518	NM_021003_at	35517	11.9416	2.76381	0.231444	6.79187	0	0
391	40186	NM_145116_at	40185	11.9396	2.19514	0.183854	4.57935	0	0
392	39481	NM_138363_at	39480	11.9296	2.02637	0.169861	4.0738	0	0
393	17897	4125257_at	17896	11.9284	2.80118	0.234834	6.97011	0	0
394	36647	NM_024624_at	36646	11.927	3.12321	0.261861	8.71324	0	0
395	35004	NM_020159_at	35003	11.9205	2.32043	0.194659	4.99481	0	0
396	42709	NM_181573_at	42708	11.9204	3.38419	0.283898	10.441	0	0
397	33385	NM_016343_at	33384	11.9176	3.67228	0.308139	12.7487	0	0
398	6213	4080455_at	6212	11.9161	3.25243	0.272944	9.52971	0	0
399	27720	NM_003715_at	27719	11.9086	2.3329	0.1959	5.03816	0	0
400	1198	4060643_at	1197	11.9066	3.03267	0.254705	8.18321	0	0
401	41625	NM_172352_at	41624	11.9038	2.42742	0.20392	5.37931	0	0
402	36418	NM_024065_at	36417	11.8845	1.93226	0.162587	3.81652	0	0
403	29372	NM_005493_at	29371	11.8819	2.71465	0.22847	6.56433	0	0
404	27160	NM_003096_at	27159	11.8748	2.44282	0.205714	5.43703	0	0
405	34211	NM_018098_at	34210	11.8673	3.22047	0.271375	9.32093	0	0
406	25887	NM_001746_at	25886	11.8665	2.10916	0.17774	4.3144	0	0
407	36300	NM_023012_at	36299	11.863	2.3219	0.195726	4.99989	0	0
408	41627	NM_172354_at	41626	11.8554	2.39449	0.201975	5.25792	0	0
409	29679	NM_005827_at	29678	11.8464	2.83066	0.238946	7.11399	0	0
410	31755	NM_014168_at	31754	11.8461	2.86699	0.242019	7.29539	0	0
411	34409	NM_018318_at	34408	11.8457	2.68601	0.22675	6.43531	0	0
412	33123	NM_016018_at	33122	11.8367	1.8701	0.157991	3.65557	0	0
413	43343	NM_194456_at	43342	11.8344	1.92424	0.162598	3.79538	0	0
414	28958	NM_005038_at	28957	11.8251	2.42139	0.204766	5.35687	0	0
415	25999	NM_001866_at	25998	11.8242	3.18427	0.269301	9.08995	0	0
416	23446	NM_001018055_at	23445	11.8228	2.06926	0.175023	4.19671	0	0
417	36508	NM_024332_at	36507	11.8228	2.06926	0.175023	4.19671	0	0
418	28454	NM_004500_at	28453	11.8164	1.78407	0.150983	3.44395	0	0
419	33198	NM_016101_at	33197	11.8157	2.22536	0.18834	4.67627	0	0
420	13222	4107329_at	13221	11.8046	1.74962	0.148215	3.3627	0	0
421	18661	4128149_at	18660	11.8039	3.16386	0.268035	8.96225	0	0
422	8582	4089703_at	8581	11.7969	2.60561	0.220873	6.08649	0	0
423	32070	NM_014554_at	32069	11.7964	2.56054	0.21706	5.89927	0	0
424	27458	NM_003432_at	27457	11.7945	2.08279	0.176589	4.23624	0	0
425	37730	NM_032292_at	37729	11.7889	2.02644	0.171893	4.07398	0	0
426	9793	4094193_at	9792	11.7866	3.4752	0.294843	11.1209	0	0
427	30794	NM_007043_at	30793	11.7836	2.41838	0.205234	5.34571	0	0
428	35711	NM_021254_at	35710	11.7832	2.76691	0.234819	6.8065	0	0
429	23150	NM_001013406_at	23149	11.7742	2.11574	0.179693	4.33414	0	0
430	21950	NM_001002258_at	21949	11.7624	2.26859	0.192868	4.81851	0	0
431	30681	NM_006910_at	30680	11.755	1.81516	0.154416	3.51899	0	0
432	31763	NM_014176_at	31762	11.7522	3.44131	0.292822	10.8627	0	0
433	30364	NM_006571_at	30363	11.7519	2.22947	0.189711	4.68963	0	0
434	18388	4127140_at	18387	11.7376	3.29316	0.280565	9.80258	0	0
435	43341	NM_194454_at	43340	11.7319	2.13111	0.18165	4.38055	0	0
436	50342	XM_935576_at	50341	11.7258	2.08184	0.177544	4.23347	0	0
437	50842	XM_938522_at	50841	11.7258	2.08184	0.177544	4.23347	0	0
438	54272	XR_017470_at	54271	11.7258	2.08184	0.177544	4.23347	0	0
439	24409	NM_001040182_at	24408	11.7096	2.2696	0.193824	4.82188	0	0
440	34939	NM_019895_at	34938	11.7096	2.2696	0.193824	4.82188	0	0
441	33153	NM_016052_at	33152	11.7087	2.26011	0.193027	4.79027	0	0
442	34550	NM_018480_at	34549	11.6946	3.21279	0.274723	9.2714	0	0
443	33455	NM_016448_at	33454	11.6807	3.37289	0.288758	10.3596	0	0
444	10106	4095385_at	10105	11.6731	2.48355	0.212758	5.59273	0	0
445	26767	NM_002687_at	26766	11.6651	2.27342	0.194891	4.83469	0	0
446	47869	XM_001132367_at	47868	11.6601	2.22272	0.190627	4.66773	0	0
447	28473	NM_004520_at	28472	11.6595	2.37975	0.204104	5.20448	0	0
448	32294	NM_014810_at	32293	11.6546	2.02333	0.173608	4.06521	0	0
449	48372	XM_001133706_at	48371	11.652	2.10742	0.180863	4.30921	0	0
450	12992	4106425_at	12991	11.6329	3.0539	0.262522	8.30456	0	0
451	35587	NM_021103_at	35586	11.6245	1.97986	0.170318	3.94455	0	0
452	24408	NM_001040181_at	24407	11.6242	2.26985	0.195268	4.82272	0	0
453	24410	NM_001040183_at	24409	11.6242	2.26985	0.195268	4.82272	0	0
454	34268	NM_018158_at	34267	11.6218	2.11307	0.181819	4.32611	0	0
455	37874	NM_032472_at	37873	11.615	2.40648	0.207186	5.30177	0	0
456	25824	NM_001681_at	25823	11.6042	2.28663	0.197052	4.87913	0	0
457	50766	XM_938130_at	50765	11.6026	2.93708	0.25314	7.65859	0	0
458	28446	NM_004492_at	28445	11.5979	2.82559	0.243629	7.08903	0	0
459	39251	NM_130906_at	39250	11.595	2.38771	0.205926	5.23327	0	0
460	21690	NM_000978_at	21689	11.5858	2.14275	0.184946	4.41602	0	0
461	25605	NM_001417_at	25604	11.5849	2.26257	0.195304	4.79847	0	0
462	25518	NM_001316_at	25517	11.5791	2.88251	0.24894	7.37431	0	0
463	41630	NM_172357_at	41629	11.5689	2.38006	0.205729	5.20559	0	0
464	28338	NM_004379_at	28337	11.5601	1.74983	0.151368	3.3632	0	0
465	39411	NM_134442_at	39410	11.5601	1.74983	0.151368	3.3632	0	0
466	21684	NM_000970_at	21683	11.5592	2.01887	0.174655	4.05268	0	0
467	37890	NM_032494_at	37889	11.5343	1.98181	0.171819	3.94988	0	0
468	27733	NM_003729_at	27732	11.522	2.42009	0.210041	5.35205	0	0
469	13481	4108309_at	13480	11.519	1.80615	0.156798	3.49708	0	0
470	16014	4117909_at	16013	11.513	3.18814	0.276916	9.11435	0	0
471	51568	XM_942169_at	51567	11.5074	2.48341	0.215809	5.59218	0	0
472	28109	NM_004128_at	28108	11.5074	2.334	0.202826	5.04201	0	0
473	24655	NM_001042604_at	24654	11.5019	2.23054	0.193928	4.69311	0	0
474	32790	NM_015446_at	32789	11.4996	2.17883	0.189471	4.52786	0	0
475	23902	NM_001032_at	23901	11.4928	1.85865	0.161722	3.62668	0	0
476	11530	4100814_at	11529	11.4904	3.13943	0.273222	8.81178	0	0
477	26990	NM_002916_at	26989	11.4873	3.22403	0.280661	9.34394	0	0
478	34361	NM_018263_at	34360	11.4873	1.60873	0.140045	3.04984	0	0
479	27754	NM_003750_at	27753	11.4854	2.0361	0.177276	4.10135	0	0
480	31706	NM_014051_at	31705	11.4817	3.43674	0.299324	10.8284	0	0
481	35884	NM_021974_at	35883	11.4799	1.82863	0.159291	3.55201	0	0
482	34778	NM_019001_at	34777	11.4764	2.18306	0.190222	4.54117	0	0
483	31511	NM_013316_at	31510	11.4736	1.73807	0.151484	3.33588	0	0
484	48515	XM_001134077_at	48514	11.471	2.33116	0.203222	5.03209	0	0
485	32795	NM_015453_at	32794	11.468	2.14793	0.187299	4.43192	0	0
486	27156	NM_003092_at	27155	11.4562	1.99847	0.174443	3.99575	0	0
487	5994	4079569_at	5993	11.4485	2.20368	0.192486	4.60652	0	0
488	25884	NM_001743_at	25883	11.4439	2.63158	0.229955	6.19704	0	0
489	34515	NM_018439_at	34514	11.4393	2.99746	0.262033	7.98594	0	0
490	45290	XM_001125820_at	45289	11.4316	2.45936	0.215136	5.49974	0	0
491	47536	XM_001131603_at	47535	11.4316	2.45936	0.215136	5.49974	0	0
492	28925	NM_005005_at	28924	11.4216	2.48342	0.217431	5.59221	0	0
493	31123	NM_012112_at	31122	11.4144	3.88572	0.340423	14.7815	0	0
494	45832	XM_001127248_at	45831	11.4085	2.06977	0.181423	4.19819	0	0
495	46400	XM_001128751_at	46399	11.4085	2.06977	0.181423	4.19819	0	0
496	49208	XM_376420_at	49207	11.3945	2.48479	0.218069	5.59751	0	0
497	50623	XM_937380_at	50622	11.3945	2.48479	0.218069	5.59751	0	0
498	27254	NM_003201_at	27253	11.3891	2.24198	0.196854	4.73047	0	0
499	52787	XR_015857_at	52786	11.3838	2.24716	0.197399	4.74746	0	0
500	26870	NM_002792_at	26869	11.3802	2.62568	0.230725	6.17177	0	0
501	28778	NM_004846_at	28777	11.3765	1.86726	0.164133	3.64838	0	0
502	44715	NR_000029_at	44714	11.3739	2.45376	0.215736	5.47842	0	0
503	46165	XM_001128093_at	46164	11.3719	2.56038	0.22515	5.89862	0	0
504	49435	XM_499333_at	49434	11.3719	2.56038	0.22515	5.89862	0	0
505	35135	NM_020374_at	35134	11.3628	2.58962	0.227904	6.01939	0	0
506	22988	NM_001011671_at	22987	11.3531	2.60711	0.229639	6.0928	0	0
507	49048	XM_371757_at	49047	11.3482	1.83832	0.161993	3.57594	0	0
508	51833	XM_943842_at	51832	11.3482	1.83832	0.161993	3.57594	0	0
509	23701	NM_001028_at	23700	11.346	1.84014	0.162184	3.58044	0	0
510	25702	NM_001527_at	25701	11.3406	2.18467	0.19264	4.54621	0	0
511	28703	NM_004766_at	28702	11.3249	2.26222	0.199755	4.79728	0	0
512	26515	NM_002417_at	26514	11.3244	3.22027	0.284367	9.31961	0	0
513	30715	NM_006947_at	30714	11.317	2.07622	0.18346	4.21701	0	0
514	31947	NM_014393_at	31946	11.3119	2.09309	0.185034	4.2666	0	0
515	25460	NM_001253_at	25459	11.3041	1.85864	0.164421	3.62667	0	0
516	25291	NM_001082969_at	25290	11.3033	2.20555	0.195125	4.61251	0	0
517	30706	NM_006938_at	30705	11.292	2.79743	0.247736	6.952	0	0
518	26258	NM_002136_at	26257	11.2885	1.6972	0.150348	3.2427	0	0
519	24610	NM_001042520_at	24609	11.2838	2.35919	0.209078	5.13082	0	0
520	24871	NM_001077443_at	24870	11.2797	1.66645	0.147739	3.17432	0	0
521	44306	NM_206825_at	44305	11.2795	2.34253	0.20768	5.07193	0	0
522	33822	NM_017635_at	33821	11.2773	1.96771	0.174484	3.91146	0	0
523	12681	4105292_at	12680	11.2765	3.44015	0.305071	10.854	0	0
524	35375	NM_020803_at	35374	11.2619	2.32453	0.206407	5.00901	0	0
525	34731	NM_018947_at	34730	11.2579	2.83926	0.252201	7.15652	0	0
526	28402	NM_004446_at	28401	11.2544	2.35069	0.208868	5.10067	0	0
527	43797	NM_199003_at	43796	11.2524	1.68474	0.149723	3.21483	0	0
528	54208	XR_017399_at	54207	11.2461	1.94058	0.172556	3.83861	0	0
529	55858	XR_019172_at	55857	11.2461	1.94058	0.172556	3.83861	0	0
530	32172	NM_014673_at	32171	11.238	2.27715	0.202629	4.8472	0	0
531	20493	4135071_at	20492	11.222	3.02479	0.269542	8.13867	0	0
532	35669	NM_021203_at	35668	11.2081	2.74353	0.244781	6.69706	0	0
533	39797	NM_139119_at	39796	11.207	1.77413	0.158305	3.42032	0	0
534	30940	NM_007217_at	30939	11.2067	3.05747	0.272824	8.32511	0	0
535	34412	NM_018321_at	34411	11.2041	2.53925	0.226636	5.81286	0	0
536	22410	NM_001005369_at	22409	11.2031	2.89175	0.258121	7.42168	0	0
537	42303	NM_177542_at	42302	11.1913	2.36864	0.211651	5.16456	0	0
538	37677	NM_032205_at	37676	11.1771	1.77659	0.158949	3.42615	0	0
539	36611	NM_024583_at	36610	11.1728	2.52013	0.22556	5.73633	0	0
540	22692	NM_001008225_at	22691	11.1544	1.72705	0.154831	3.3105	0	0
541	21308	NM_000553_at	21307	11.1523	2.26659	0.20324	4.81183	0	0
542	31921	NM_014366_at	31920	11.1467	2.38503	0.213967	5.22354	0	0
543	33829	NM_017643_at	33828	11.1401	1.93097	0.173335	3.81312	0	0
544	33850	NM_017666_at	33849	11.138	2.27223	0.204008	4.83071	0	0
545	28923	NM_005003_at	28922	11.1246	2.65795	0.238926	6.31134	0	0
546	30982	NM_007266_at	30981	11.1155	1.93575	0.174149	3.82578	0	0
547	27509	NM_003487_at	27508	11.1155	2.05379	0.184768	4.15196	0	0
548	39844	NM_139215_at	39843	11.1155	2.05379	0.184768	4.15196	0	0
549	2003	4063791_at	2002	11.1099	2.58092	0.232308	5.98322	0	0
550	33483	NM_016487_at	33482	11.1095	3.10109	0.279139	8.58068	0	0
551	26549	NM_002453_at	26548	11.1066	2.90037	0.261139	7.46616	0	0
552	35697	NM_021238_at	35696	11.1004	2.97394	0.267913	7.85679	0	0
553	16775	4120807_at	16774	11.0993	2.12299	0.191272	4.35595	0	0
554	160	4056877_at	159	11.0948	2.16345	0.194997	4.47985	0	0
555	29646	NM_005788_at	29645	11.0944	2.58519	0.233018	6.00093	0	0
556	40773	NM_152490_at	40772	11.093	2.087	0.188137	4.24863	0	0
557	43389	NM_198066_at	43388	11.0911	2.1931	0.197735	4.57286	0	0
558	3993	4071559_at	3992	11.0864	2.7174	0.24511	6.57688	0	0
559	32932	NM_015659_at	32931	11.0795	2.33196	0.210475	5.03487	0	0
560	29729	NM_005880_at	29728	11.0759	2.25129	0.203259	4.76108	0	0
561	25556	NM_001359_at	25555	11.0704	2.37597	0.214624	5.19086	0	0
562	24189	NM_001039375_at	24188	11.0682	2.10321	0.190023	4.29664	0	0
563	28839	NM_004912_at	28838	11.0666	1.8682	0.168814	3.65078	0	0
564	43737	NM_198889_at	43736	11.061	1.68505	0.152342	3.21551	0	0
565	8619	4089867_at	8618	11.0586	2.06958	0.187147	4.19765	0	0
566	44307	NM_206826_at	44306	11.0577	2.39369	0.216472	5.25498	0	0
567	32242	NM_014750_at	32241	11.0553	3.63656	0.328944	12.437	0	0
568	28788	NM_004856_at	28787	11.0536	3.09553	0.280047	8.54768	0	0
569	43456	NM_198220_at	43455	11.052	2.17723	0.196999	4.52284	0	0
570	30778	NM_007027_at	30777	11.0497	2.38478	0.215823	5.22265	0	0
571	34355	NM_018256_at	34354	11.0449	2.67702	0.242375	6.39532	0	0
572	23290	NM_001014972_at	23289	11.0408	2.16368	0.195972	4.48056	0	0
573	32040	NM_014497_at	32039	11.0408	2.16368	0.195972	4.48056	0	0
574	29328	NM_005445_at	29327	11.0367	2.40773	0.218157	5.3064	0	0
575	25554	NM_001357_at	25553	11.0292	1.73873	0.157647	3.3374	0	0
576	6227	4080519_at	6226	11.029	2.65127	0.24039	6.2822	0	0
577	36055	NM_022366_at	36054	11.0287	2.30105	0.208642	4.92816	0	0
578	27827	NM_003826_at	27826	11.0262	2.40433	0.218056	5.29389	0	0
579	25718	NM_001545_at	25717	11.0221	2.1261	0.192894	4.36537	0	0
580	24549	NM_001042417_at	24548	11.0212	1.94794	0.176745	3.85823	0	0
581	30931	NM_007208_at	30930	11.0181	1.91745	0.174027	3.77754	0	0
582	26492	NM_002393_at	26491	11.015	2.13682	0.193992	4.39793	0	0
583	44650	NM_213603_at	44649	11.0095	1.80243	0.163716	3.48808	0	0
584	37811	NM_032383_at	37810	11.0079	2.06542	0.18763	4.18555	0	0
585	36820	NM_024831_at	36819	11.0065	2.2242	0.202081	4.67253	0	0
586	49683	XM_928075_at	49682	10.9984	2.4742	0.22496	5.55658	0	0
587	52031	XM_945078_at	52030	10.9984	2.4742	0.22496	5.55658	0	0
588	38787	NM_054016_at	38786	10.9949	2.07801	0.188997	4.22223	0	0
589	24037	NM_001035006_at	24036	10.9939	1.90163	0.172971	3.73635	0	0
590	31409	NM_012460_at	31408	10.9746	2.45936	0.224095	5.49974	0	0
591	25064	NM_001080415_at	25063	10.9744	2.18199	0.198826	4.53778	0	0
592	51292	XM_940802_at	51291	10.9744	2.18199	0.198826	4.53778	0	0
593	40159	NM_145049_at	40158	10.967	2.32685	0.212169	5.01707	0	0
594	31272	NM_012290_at	31271	10.9668	2.09127	0.190691	4.26124	0	0
595	39578	NM_138555_at	39577	10.9565	3.10226	0.283143	8.58766	0	0
596	53448	XR_016589_at	53447	10.9562	2.32658	0.212354	5.01614	0	0
597	55760	XR_019073_at	55759	10.9562	2.32658	0.212354	5.01614	0	0
598	43147	NM_182926_at	43146	10.9499	2.82185	0.257705	7.07071	0	0
599	30874	NM_007145_at	30873	10.9478	2.16344	0.197615	4.47982	0	0
600	44871	NR_002561_at	44870	10.9451	2.94937	0.269469	7.72414	0	0
601	34055	NM_017906_at	34054	10.9376	2.24162	0.204946	4.72929	0	0
602	24960	NM_001079522_at	24959	10.9367	2.83264	0.259002	7.12376	0	0
603	40981	NM_152758_at	40980	10.9351	2.42291	0.221571	5.36253	0	0
604	18577	4127859_at	18576	10.9342	2.93864	0.268756	7.66686	0	0
605	33509	NM_016520_at	33508	10.9267	2.58328	0.23642	5.99302	0	0
606	34397	NM_018304_at	34396	10.9259	3.12355	0.285885	8.71532	0	0
607	30384	NM_006591_at	30383	10.9194	2.73277	0.250267	6.64732	0	0
608	23238	NM_001013843_at	23237	10.9154	1.9981	0.183054	3.99474	0	0
609	42542	NM_178587_at	42541	10.9107	1.59893	0.146547	3.0292	0	0
610	29243	NM_005348_at	29242	10.907	2.24089	0.205454	4.72689	0	0
611	32851	NM_015530_at	32850	10.9046	1.74845	0.160342	3.35998	0	0
612	36758	NM_024755_at	36757	10.9038	1.96567	0.180274	3.90593	0	0
613	49055	XM_371848_at	49054	10.9024	2.36309	0.216749	5.14472	0	0
614	51365	XM_941139_at	51364	10.9024	2.36309	0.216749	5.14472	0	0
615	33001	NM_015859_at	33000	10.8946	2.24653	0.206206	4.74541	0	0
616	37376	NM_031314_at	37375	10.8928	1.60925	0.147735	3.05093	0	0
617	43342	NM_194455_at	43341	10.8907	1.75617	0.161254	3.37801	0	0
618	23966	NM_001033571_at	23965	10.886	2.18772	0.200967	4.55584	0	0
619	23967	NM_001033572_at	23966	10.886	2.18772	0.200967	4.55584	0	0
620	37684	NM_032217_at	37683	10.8792	1.62182	0.149075	3.07762	0	0
621	24959	NM_001079521_at	24958	10.8772	2.83335	0.260485	7.12729	0	0
622	33077	NM_015959_at	33076	10.8734	1.89293	0.174088	3.71389	0	0
623	18424	4127283_at	18423	10.8579	2.06114	0.189828	4.17316	0	0
624	45372	XM_001126052_at	45371	10.8527	1.90012	0.175082	3.73245	0	0
625	31779	NM_014206_at	31778	10.8453	2.26379	0.208735	4.80252	0	0
626	36126	NM_022551_at	36125	10.8318	1.99584	0.184257	3.98849	0	0
627	21328	NM_000582_at	21327	10.8293	5.18462	0.47876	36.3685	0	0
628	27362	NM_003329_at	27361	10.8272	3.06213	0.282817	8.35204	0	0
629	4638	4074109_at	4637	10.8257	2.89334	0.267266	7.42987	0	0
630	28891	NM_004969_at	28890	10.825	2.08174	0.192309	4.23318	0	0
631	28199	NM_004229_at	28198	10.818	1.81256	0.16755	3.51265	0	0
632	35531	NM_021019_at	35530	10.8166	2.00916	0.185748	4.02546	0	0
633	20882	NM_000108_at	20881	10.8035	2.24046	0.207383	4.72547	0	0
634	33128	NM_016023_at	33127	10.8033	2.26692	0.209835	4.81295	0	0
635	45127	NR_003098_at	45126	10.7918	2.17089	0.201161	4.50301	0	0
636	34309	NM_018204_at	34308	10.7892	3.02357	0.28024	8.13175	0	0
637	29238	NM_005342_at	29237	10.7848	4.05194	0.375707	16.5865	0	0
638	25741	NM_001568_at	25740	10.7762	2.23715	0.207601	4.71464	0	0
639	31875	NM_014313_at	31874	10.7747	1.98826	0.184531	3.96759	0	0
640	43170	NM_182976_at	43169	10.7741	2.02864	0.188289	4.0802	0	0
641	49694	XM_928169_at	49693	10.7694	2.20734	0.204964	4.61823	0	0
642	51339	XM_941016_at	51338	10.7694	2.20734	0.204964	4.61823	0	0
643	32763	NM_015412_at	32762	10.7625	1.96483	0.182563	3.90366	0	0
644	24125	NM_001037663_at	24124	10.7559	2.21645	0.206069	4.64749	0	0
645	32796	NM_015454_at	32795	10.7532	1.97685	0.183838	3.93632	0	0
646	23398	NM_001017963_at	23397	10.7424	2.17897	0.202838	4.5283	0	0
647	26715	NM_002624_at	26714	10.7422	2.31071	0.215106	4.96126	0	0
648	36788	NM_024790_at	36787	10.7353	2.28499	0.212848	4.87362	0	0
649	32413	NM_014947_at	32412	10.7272	1.7857	0.166464	3.44785	0	0
650	22805	NM_001008938_at	22804	10.7198	2.0424	0.190526	4.1193	0	0
651	22574	NM_001006945_at	22573	10.7182	2.75102	0.256669	6.73194	0	0
652	42310	NM_177559_at	42309	10.7166	1.82739	0.17052	3.54895	0	0
653	24417	NM_001040199_at	24416	10.7154	2.08738	0.194802	4.24976	0	0
654	29236	NM_005340_at	29235	10.7152	2.22719	0.207853	4.6822	0	0
655	26782	NM_002703_at	26781	10.7116	2.47145	0.230727	5.546	0	0
656	56201	XR_019562_at	56200	10.7	2.18946	0.204622	4.56135	0	0
657	45193	NR_003284_at	45192	10.6999	1.65664	0.154828	3.15282	0	0
658	7812	4086618_at	7811	10.6931	2.92238	0.273296	7.58095	0	0
659	55786	XR_019099_at	55785	10.6925	1.91367	0.178974	3.76767	0	0
660	37614	NM_032117_at	37613	10.69	2.85275	0.266861	7.22378	0	0
661	28907	NM_004986_at	28906	10.6845	2.80933	0.262934	7.00958	0	0
662	26089	NM_001959_at	26088	10.6834	1.82696	0.17101	3.5479	0	0
663	19317	4130574_at	19316	10.6812	1.90146	0.17802	3.73591	0	0
664	34177	NM_018062_at	34176	10.6811	2.47797	0.231996	5.57114	0	0
665	33398	NM_016359_at	33397	10.6811	3.18533	0.298221	9.09661	0	0
666	34529	NM_018454_at	34528	10.6811	3.18533	0.298221	9.09661	0	0
667	23329	NM_001015892_at	23328	10.6739	2.0632	0.193295	4.17914	0	0
668	45314	XM_001125898_at	45313	10.6685	2.03942	0.191164	4.11081	0	0
669	24834	NM_001077204_at	24833	10.6592	2.26091	0.212108	4.79292	0	0
670	33147	NM_016045_at	33146	10.6573	2.20775	0.207158	4.61955	0	0
671	45173	NR_003252_at	45172	10.6499	2.30409	0.216348	4.93855	0	0
672	41102	NM_152998_at	41101	10.6477	2.56446	0.240846	5.91534	0	0
673	24353	NM_001040058_at	24352	10.6458	5.14857	0.483626	35.4712	0	0
674	37719	NM_032280_at	37718	10.6364	1.92988	0.18144	3.81023	0	0
675	31131	NM_012120_at	31130	10.6217	2.60925	0.245653	6.10187	0	0
676	33086	NM_015971_at	33085	10.6196	1.85408	0.17459	3.61522	0	0
677	32247	NM_014756_at	32246	10.6156	2.01501	0.189817	4.04184	0	0
678	4187	4072273_at	4186	10.6076	2.46454	0.232337	5.51951	0	0
679	32874	NM_015564_at	32873	10.6073	2.10408	0.198361	4.29924	0	0
680	31099	NM_012086_at	31098	10.6064	2.05251	0.193516	4.14826	0	0
681	23964	NM_001033569_at	23963	10.6034	2.03643	0.192054	4.1023	0	0
682	23965	NM_001033570_at	23964	10.6034	2.03643	0.192054	4.1023	0	0
683	28300	NM_004336_at	28299	10.6011	2.77449	0.261716	6.84235	0	0
684	33499	NM_016507_at	33498	10.5883	1.71517	0.161987	3.28334	0	0
685	38553	NM_033536_at	38552	10.5853	1.79722	0.169785	3.47549	0	0
686	38554	NM_033537_at	38553	10.5853	1.79722	0.169785	3.47549	0	0
687	40414	NM_145897_at	40413	10.5754	2.31199	0.21862	4.96568	0	0
688	30310	NM_006511_at	30309	10.5722	2.10503	0.199111	4.30207	0	0
689	32452	NM_014997_at	32451	10.5636	2.38909	0.226162	5.23828	0	0
690	23574	NM_001024688_at	23573	10.5629	2.14312	0.202892	4.41717	0	0
691	26578	NM_002485_at	26577	10.5629	2.14312	0.202892	4.41717	0	0
692	36805	NM_024813_at	36804	10.5628	2.01831	0.191078	4.05109	0	0
693	45495	XM_001126361_at	45494	10.5585	1.81678	0.172067	3.52293	0	0
694	37697	NM_032239_at	37696	10.5521	2.43514	0.230773	5.40817	0	0
695	29319	NM_005436_at	29318	10.5476	1.85215	0.175599	3.61038	0	0
696	39801	NM_139126_at	39800	10.5466	2.31569	0.219568	4.97841	0	0
697	29688	NM_005836_at	29687	10.5387	2.58143	0.244947	5.98532	0	0
698	52097	XM_945796_at	52096	10.53	2.1376	0.203002	4.40029	0	0
699	54565	XR_017790_at	54564	10.53	2.1376	0.203002	4.40029	0	0
700	38295	NM_033107_at	38294	10.5253	1.79066	0.170129	3.45972	0	0
701	44863	NR_002444_at	44862	10.5227	2.75899	0.262193	6.76923	0	0
702	27763	NM_003760_at	27762	10.5169	1.90153	0.180807	3.73608	0	0
703	51535	XM_942001_at	51534	10.4968	2.13791	0.203673	4.40123	0	0
704	49185	XM_374987_at	49184	10.4961	2.46092	0.234462	5.50569	0	0
705	51196	XM_940327_at	51195	10.4961	2.46092	0.234462	5.50569	0	0
706	39347	NM_133482_at	39346	10.4916	2.05902	0.196253	4.16702	0	0
707	46906	XM_001130048_at	46905	10.4879	2.33688	0.222817	5.05209	0	0
708	47762	XM_001132127_at	47761	10.4879	2.33688	0.222817	5.05209	0	0
709	36468	NM_024120_at	36467	10.4833	1.93315	0.184402	3.81887	0	0
710	36961	NM_025075_at	36960	10.4717	2.41646	0.23076	5.33858	0	0
711	40256	NM_145266_at	40255	10.4701	2.43111	0.232195	5.39308	0	0
712	54292	XR_017490_at	54291	10.4661	1.84221	0.176016	3.58559	0	0
713	46131	XM_001128002_at	46130	10.4638	2.56192	0.244836	5.90494	0	0
714	46137	XM_001128014_at	46136	10.4638	2.56192	0.244836	5.90494	0	0
715	34518	NM_018442_at	34517	10.4546	2.03652	0.194796	4.10254	0	0
716	34176	NM_018061_at	34175	10.4542	1.83589	0.175613	3.56991	0	0
717	1107	4060381_at	1106	10.452	2.78274	0.266239	6.88157	0	0
718	26278	NM_002157_at	26277	10.4517	2.37553	0.227286	5.18926	0	0
719	27247	NM_003193_at	27246	10.4499	2.07284	0.19836	4.20715	0	0
720	32010	NM_014463_at	32009	10.4491	2.50501	0.239734	5.67652	0	0
721	7724	4086284_at	7723	10.4465	2.36426	0.226321	5.14889	0	0
722	31955	NM_014402_at	31954	10.4411	2.02165	0.193624	4.06048	0	0
723	33614	NM_016648_at	33613	10.4398	1.91838	0.183757	3.77999	0	0
724	31917	NM_014362_at	31916	10.4371	2.20264	0.211039	4.6032	0	0
725	29026	NM_005113_at	29025	10.4365	2.11439	0.202597	4.33007	0	0
726	34967	NM_020117_at	34966	10.4337	2.02158	0.193755	4.06027	0	0
727	49228	XM_377761_at	49227	10.4301	2.25532	0.216232	4.7744	0	0
728	28832	NM_004902_at	28831	10.4252	1.70429	0.163479	3.25868	0	0
729	43275	NM_184234_at	43274	10.4252	1.70429	0.163479	3.25868	0	0
730	23100	NM_001012756_at	23099	10.4241	2.15435	0.20667	4.45167	0	0
731	10030	4095111_at	10029	10.4234	2.0806	0.199609	4.22983	0	0
732	30610	NM_006837_at	30609	10.4163	1.96547	0.188692	3.9054	0	0
733	46699	XM_001129510_at	46698	10.4161	2.66844	0.256184	6.35742	0	0
734	29365	NM_005486_at	29364	10.4138	2.70181	0.259445	6.50618	0	0
735	30135	NM_006327_at	30134	10.41	1.80357	0.173254	3.49084	0	0
736	29517	NM_005644_at	29516	10.4063	2.26098	0.217271	4.79317	0	0
737	54099	XR_017289_at	54098	10.4016	1.85123	0.177976	3.60808	0	0
738	23613	NM_001025072_at	23612	10.3919	1.89425	0.18228	3.71728	0	0
739	23614	NM_001025073_at	23613	10.3919	1.89425	0.18228	3.71728	0	0
740	27204	NM_003144_at	27203	10.3903	1.97176	0.18977	3.92247	0	0
741	37382	NM_031370_at	37381	10.3877	1.72861	0.166409	3.31408	0	0
742	22611	NM_001007214_at	22610	10.3855	2.14298	0.206343	4.41673	0	0
743	6584	4081771_at	6583	10.367	1.77347	0.171069	3.41875	0	0
744	41064	NM_152902_at	41063	10.3662	2.20366	0.212582	4.60646	0	0
745	41147	NM_153201_at	41146	10.3643	1.63452	0.157707	3.10485	0	0
746	31748	NM_014159_at	31747	10.3622	1.88068	0.181493	3.68248	0	0
747	36114	NM_022488_at	36113	10.3612	2.39753	0.231394	5.26901	0	0
748	8006	4087394_at	8005	10.3586	2.75239	0.265711	6.73832	0	0
749	27898	NM_003902_at	27897	10.3559	2.08845	0.201668	4.25292	0	0
750	22467	NM_001005526_at	22466	10.3535	1.78304	0.172215	3.44151	0	0
751	40818	NM_152546_at	40817	10.3506	2.15304	0.208012	4.44765	0	0
752	44166	NM_203364_at	44165	10.35	1.7578	0.169836	3.38183	0	0
753	28481	NM_004528_at	28480	10.348	2.40316	0.232233	5.2896	0	0
754	43393	NM_198077_at	43392	10.3479	1.58566	0.153235	3.00145	0	0
755	44848	NR_002323_at	44847	10.3458	1.98845	0.192198	3.9681	0	0
756	28412	NM_004456_at	28411	10.3449	2.44948	0.23678	5.46217	0	0
757	25427	NM_001219_at	25426	10.3442	2.25774	0.218262	4.7824	0	0
758	21709	NM_000999_at	21708	10.3434	2.04988	0.198182	4.14072	0	0
759	24044	NM_001035258_at	24043	10.3434	2.04988	0.198182	4.14072	0	0
760	27374	NM_003341_at	27373	10.3331	1.66909	0.161529	3.18014	0	0
761	29597	NM_005732_at	29596	10.3257	2.03535	0.197115	4.09923	0	0
762	36810	NM_024818_at	36809	10.3093	1.82561	0.177084	3.54456	0	0
763	10002	4095020_at	10001	10.3087	1.77196	0.17189	3.41519	0	0
764	29002	NM_005087_at	29001	10.3076	2.4297	0.23572	5.3878	0	0
765	8845	4090671_at	8844	10.3072	2.37644	0.230561	5.19254	0	0
766	14411	4111880_at	14410	10.3023	2.33546	0.226694	5.04714	0	0
767	35035	NM_020194_at	35034	10.281	1.77314	0.172468	3.41797	0	0
768	24658	NM_001042618_at	24657	10.2737	2.08555	0.202999	4.24436	0	0
769	15262	4115048_at	15261	10.2702	2.37632	0.231381	5.19209	0	0
770	35600	NM_021121_at	35599	10.2697	1.89733	0.18475	3.72524	0	0
771	28582	NM_004632_at	28581	10.2696	2.56212	0.249485	5.90575	0	0
772	38586	NM_033657_at	38585	10.2696	2.56212	0.249485	5.90575	0	0
773	44924	NR_002735_at	44923	10.2666	3.38949	0.330146	10.4794	0	0
774	49230	XM_377955_at	49229	10.2648	1.96076	0.191018	3.89268	0	0
775	49286	XM_380018_at	49285	10.2648	1.96076	0.191018	3.89268	0	0
776	51183	XM_940258_at	51182	10.2648	1.96076	0.191018	3.89268	0	0
777	1959	4063608_at	1958	10.2634	2.18828	0.213213	4.55763	0	0
778	22907	NM_001010891_at	22906	10.2606	1.78082	0.173558	3.43621	0	0
779	34102	NM_017968_at	34101	10.2486	1.91227	0.186588	3.76401	0	0
780	34290	NM_018183_at	34289	10.246	2.19064	0.213805	4.56507	0	0
781	45059	NR_002977_at	45058	10.244	2.481	0.24219	5.58286	0	0
782	31821	NM_014250_at	31820	10.2418	1.94951	0.190348	3.86244	0	0
783	37667	NM_032182_at	37666	10.2399	1.63579	0.159746	3.10757	0	0
784	44601	NM_207662_at	44600	10.2372	1.72752	0.16875	3.31159	0	0
785	36659	NM_024638_at	36658	10.2339	1.81188	0.177048	3.511	0	0
786	34002	NM_017847_at	34001	10.2317	2.25478	0.220373	4.77262	0	0
787	27381	NM_003349_at	27380	10.2301	1.86063	0.181877	3.63166	0	0
788	29363	NM_005484_at	29362	10.2293	2.08005	0.203342	4.22822	0	0
789	35333	NM_020748_at	35332	10.2271	1.71168	0.167368	3.27542	0	0
790	36630	NM_024604_at	36629	10.223	2.478	0.242395	5.57125	0	0
791	4146	4072123_at	4145	10.2227	2.10597	0.206009	4.30487	0	0
792	28499	NM_004547_at	28498	10.2217	2.03894	0.199472	4.10943	0	0
793	18916	4129066_at	18915	10.2198	2.4255	0.237333	5.37214	0	0
794	45499	XM_001126375_at	45498	10.214	1.81062	0.177269	3.50793	0	0
795	36469	NM_024122_at	36468	10.2016	2.5676	0.251685	5.92822	0	0
796	21693	NM_000981_at	21692	10.2003	1.59945	0.156805	3.03028	0	0
797	43381	NM_198047_at	43380	10.1985	2.12796	0.208655	4.371	0	0
798	55584	XR_018891_at	55583	10.1965	1.77581	0.174159	3.42429	0	0
799	4352	4072893_at	4351	10.1932	2.11376	0.20737	4.32819	0	0
800	32347	NM_014877_at	32346	10.1847	1.79205	0.175955	3.46306	0	0
801	33969	NM_017812_at	33968	10.1833	2.39148	0.234843	5.24694	0	0
802	13087	4106817_at	13086	10.1826	2.93083	0.287828	7.62549	0	0
803	181	4056951_at	180	10.1751	2.23901	0.220047	4.72072	0	0
804	24355	NM_001040060_at	24354	10.1734	5.069	0.498262	33.5677	0	0
805	41958	NM_173834_at	41957	10.169	2.14505	0.21094	4.42307	0	0
806	39639	NM_138720_at	39638	10.1689	2.87426	0.282653	7.33229	0	0
807	27402	NM_003372_at	27401	10.1687	2.49475	0.245336	5.6363	0	0
808	31234	NM_012245_at	31233	10.1673	1.95194	0.191982	3.86895	0	0
809	30992	NM_007276_at	30991	10.1665	2.23251	0.219594	4.69952	0	0
810	30597	NM_006824_at	30596	10.161	1.84241	0.181323	3.58609	0	0
811	37416	NM_031446_at	37415	10.1487	2.56546	0.252787	5.91942	0	0
812	36298	NM_023010_at	36297	10.1435	1.86826	0.184183	3.65091	0	0
813	25963	NM_001827_at	25962	10.1344	3.96491	0.391231	15.6155	0	0
814	38909	NM_079423_at	38908	10.1338	1.87674	0.185196	3.67244	0	0
815	32814	NM_015475_at	32813	10.1217	2.05644	0.203173	4.15959	0	0
816	40021	NM_144684_at	40020	10.1201	2.49773	0.246809	5.64796	0	0
817	23408	NM_001017977_at	23407	10.1182	1.94709	0.192434	3.85596	0	0
818	28728	NM_004792_at	28727	10.1169	2.22542	0.219971	4.67646	0	0
819	37306	NM_031157_at	37305	10.1168	1.58546	0.156715	3.00105	0	0
820	27382	NM_003350_at	27381	10.1167	2.49268	0.246392	5.62823	0	0
821	38114	NM_032847_at	38113	10.1167	1.93034	0.190808	3.81146	0	0
822	42828	NM_181801_at	42827	10.115	2.85191	0.281949	7.21958	0	0
823	33046	NM_015919_at	33045	10.1134	2.24649	0.22213	4.74526	0	0
824	5065	4075808_at	5064	10.1129	2.64285	0.261335	6.24566	0	0
825	26275	NM_002154_at	26274	10.1091	1.97442	0.195311	3.92969	0	0
826	34810	NM_019042_at	34809	10.1079	2.38751	0.236202	5.23252	0	0
827	34059	NM_017910_at	34058	10.1038	1.88635	0.186696	3.69698	0	0
828	23878	NM_001032374_at	23877	10.1003	2.14527	0.212396	4.42374	0	0
829	10830	4098123_at	10829	10.0955	2.29903	0.227727	4.92127	0	0
830	30116	NM_006305_at	30115	10.0934	2.01746	0.199879	4.0487	0	0
831	51375	XM_941191_at	51374	10.0921	1.90518	0.188779	3.74557	0	0
832	29744	NM_005898_at	29743	10.0863	1.6678	0.165353	3.1773	0	0
833	26230	NM_002106_at	26229	10.086	2.60388	0.258168	6.07921	0	0
834	7873	4086822_at	7872	10.0835	2.26544	0.224669	4.80802	0	0
835	34287	NM_018180_at	34286	10.0823	2.16769	0.214999	4.49304	0	0
836	35810	NM_021825_at	35809	10.0816	2.19645	0.217867	4.5835	0	0
837	24685	NM_001042717_at	24684	10.0784	1.69956	0.168634	3.24802	0	0
838	54457	XR_017661_at	54456	10.0757	1.74952	0.173637	3.36248	0	0
839	56079	XR_019410_at	56078	10.0757	1.74952	0.173637	3.36248	0	0
840	25555	NM_001358_at	25554	10.0695	2.04483	0.203072	4.12626	0	0
841	25996	NM_001863_at	25995	10.0649	2.11631	0.210266	4.33583	0	0
842	34285	NM_018178_at	34284	10.0644	2.35201	0.233695	5.10534	0	0
843	36582	NM_024548_at	36581	10.0626	2.56382	0.254787	5.91271	0	0
844	23419	NM_001017_at	23418	10.0598	2.16299	0.215014	4.47842	0	0
845	24798	NM_001071_at	24797	10.0561	3.45643	0.343715	10.9771	0	0
846	35619	NM_021145_at	35618	10.0527	1.97557	0.196521	3.93282	0	0
847	8727	4090226_at	8726	10.0475	2.15558	0.214538	4.45548	0	0
848	33090	NM_015975_at	33089	10.046	2.49338	0.248197	5.63095	0	0
849	45402	XM_001126120_at	45401	10.046	2.49338	0.248197	5.63095	0	0
850	37116	NM_030621_at	37115	10.0449	1.8935	0.188504	3.71535	0	0
851	30599	NM_006826_at	30598	10.0403	1.98404	0.197608	3.95598	0	0
852	48217	XM_001133298_at	48216	10.0369	2.57899	0.25695	5.97519	0	0
853	42274	NM_177438_at	42273	10.0328	1.87645	0.187031	3.67171	0	0
854	30886	NM_007159_at	30885	10.0325	1.69421	0.168871	3.23599	0	0
855	47434	XM_001131387_at	47433	10.0284	1.88023	0.18749	3.68135	0	0
856	26967	NM_002892_at	26966	10.0265	2.17494	0.21692	4.51568	0	0
857	40590	NM_152281_at	40589	10.0254	2.07291	0.206765	4.20734	0	0
858	29856	NM_006023_at	29855	10.0159	2.49281	0.248884	5.62872	0	0
859	21938	NM_001002243_at	21937	10.0155	1.62964	0.162713	3.09436	0	0
860	33842	NM_017657_at	33841	10.0155	1.62964	0.162713	3.09436	0	0
861	23879	NM_001032375_at	23878	10.015	2.15336	0.215014	4.44863	0	0
862	9643	4093682_at	9642	10.0145	2.60216	0.259841	6.07196	0	0
863	16363	4119187_at	16362	10.0044	2.03046	0.202957	4.08536	0	0
864	33703	NM_017446_at	33702	10.001	2.59082	0.259055	6.02439	0	0
865	49557	XM_926858_at	49556	9.99332	2.25552	0.225703	4.77506	0	0
866	51445	XM_941521_at	51444	9.99332	2.25552	0.225703	4.77506	0	0
867	54142	XR_017332_at	54141	9.99332	2.25552	0.225703	4.77506	0	0
868	17253	4122655_at	17252	9.98442	2.59336	0.25974	6.03501	0	0
869	35316	NM_020726_at	35315	9.98313	2.32046	0.232439	4.99493	0	0
870	8765	4090345_at	8764	9.98092	2.35769	0.236219	5.12548	0	0
871	24046	NM_001035267_at	24045	9.97838	1.89731	0.190143	3.72519	0	0
872	29062	NM_005154_at	29061	9.97742	2.2618	0.226692	4.79589	0	0
873	34246	NM_018136_at	34245	9.9702	3.45955	0.346989	11.0009	0	0
874	42369	NM_178043_at	42368	9.94935	2.37767	0.238977	5.19697	0	0
875	25527	NM_001326_at	25526	9.94801	2.40529	0.241786	5.29743	0	0
876	25525	NM_001324_at	25524	9.9459	1.88284	0.189308	3.68801	0	0
877	23243	NM_001014286_at	23242	9.94501	1.79538	0.180531	3.47107	0	0
878	23936	NM_001033503_at	23935	9.94418	1.97499	0.198607	3.93125	0	0
879	33200	NM_016103_at	33199	9.94418	1.97499	0.198607	3.93125	0	0
880	24818	NM_001076786_at	24817	9.93631	2.04755	0.206067	4.13403	0	0
881	28922	NM_005002_at	28921	9.93336	1.75737	0.176916	3.38081	0	0
882	26884	NM_002807_at	26883	9.93024	1.76952	0.178195	3.40941	0	0
883	36997	NM_025138_at	36996	9.92921	1.67046	0.168237	3.18317	0	0
884	30737	NM_006980_at	30736	9.92682	2.00316	0.201793	4.00877	0	0
885	24113	NM_001037533_at	24112	9.92664	1.6496	0.166179	3.13747	0	0
886	36290	NM_023000_at	36289	9.92604	2.14421	0.216019	4.4205	0	0
887	25398	NM_001184_at	25397	9.92311	1.87232	0.188683	3.66121	0	0
888	30254	NM_006452_at	30253	9.92288	2.01402	0.202968	4.03907	0	0
889	44218	NM_203437_at	44217	9.92212	1.59298	0.160549	3.01672	0	0
890	43259	NM_183404_at	43258	9.92105	2.05114	0.206746	4.14434	0	0
891	38817	NM_057092_at	38816	9.92058	1.66379	0.167711	3.16848	0	0
892	23155	NM_001013438_at	23154	9.91995	2.31926	0.233797	4.99075	0	0
893	40735	NM_152444_at	40734	9.91861	2.23739	0.225575	4.71543	0	0
894	44394	NM_207012_at	44393	9.91766	1.64507	0.165873	3.12764	0	0
895	30601	NM_006828_at	30600	9.91227	2.11946	0.213822	4.34531	0	0
896	39065	NM_080794_at	39064	9.90756	2.34879	0.237071	5.09398	0	0
897	25448	NM_001241_at	25447	9.90489	1.59275	0.160805	3.01624	0	0
898	25478	NM_001271_at	25477	9.89936	1.93427	0.195393	3.82184	0	0
899	28232	NM_004264_at	28231	9.89885	2.76533	0.279359	6.79904	0	0
900	25363	NM_001147_at	25362	9.89822	2.88454	0.29142	7.38469	0	0
901	27543	NM_003526_at	27542	9.89603	1.72908	0.174725	3.31517	0	0
902	33775	NM_017569_at	33774	9.89555	1.79345	0.181238	3.46643	0	0
903	30134	NM_006325_at	30133	9.89513	2.34461	0.236946	5.07922	0	0
904	13331	4107711_at	13330	9.89356	2.69465	0.272364	6.47396	0	0
905	45516	XM_001126417_at	45515	9.89349	1.78864	0.18079	3.45489	0	0
906	26074	NM_001943_at	26073	9.89198	3.53	0.356854	11.5514	0	0
907	47870	XM_001132369_at	47869	9.88888	1.90767	0.192911	3.75203	0	0
908	28641	NM_004701_at	28640	9.88824	3.08763	0.312253	8.501	0	0
909	53977	XR_017160_at	53976	9.88565	1.83565	0.185689	3.56933	0	0
910	55761	XR_019074_at	55760	9.88565	1.83565	0.185689	3.56933	0	0
911	28474	NM_004521_at	28473	9.88522	1.98876	0.201186	3.96897	0	0
912	24955	NM_001079515_at	24954	9.88475	1.98846	0.201164	3.96812	0	0
913	51518	XM_941904_at	51517	9.88468	2.09173	0.211614	4.2626	0	0
914	10377	4096394_at	10376	9.88432	2.47707	0.250606	5.56765	0	0
915	45506	XM_001126391_at	45505	9.87795	1.75976	0.17815	3.38641	0	0
916	26260	NM_002138_at	26259	9.8722	1.64672	0.166804	3.1312	0	0
917	32298	NM_014814_at	32297	9.87219	1.89243	0.191693	3.7126	0	0
918	50882	XM_938779_at	50881	9.87212	2.1826	0.221088	4.53972	0	0
919	37398	NM_031423_at	37397	9.86139	3.58342	0.363379	11.9871	0	0
920	27139	NM_003074_at	27138	9.8608	1.81889	0.184456	3.52809	0	0
921	33566	NM_016587_at	33565	9.85165	2.13466	0.21668	4.39132	0	0
922	24263	NM_001039693_at	24262	9.84727	1.72313	0.174986	3.30153	0	0
923	39222	NM_130833_at	39221	9.83591	2.35321	0.239247	5.10961	0	0
924	32214	NM_014720_at	32213	9.82283	2.38133	0.242428	5.21018	0	0
925	19072	4129628_at	19071	9.82261	2.66753	0.271571	6.35342	0	0
926	28283	NM_004318_at	28282	9.81456	2.96285	0.301884	7.79665	0	0
927	33600	NM_016627_at	33599	9.80913	1.84449	0.188038	3.59126	0	0
928	39220	NM_130831_at	39219	9.80874	2.34624	0.239199	5.08499	0	0
929	22801	NM_001008897_at	22800	9.80754	2.17118	0.221379	4.50393	0	0
930	37160	NM_030752_at	37159	9.80754	2.17118	0.221379	4.50393	0	0
931	28190	NM_004219_at	28189	9.80669	3.12889	0.319057	8.74763	0	0
932	42996	NM_182627_at	42995	9.80255	2.30897	0.235548	4.9553	0	0
933	30166	NM_006358_at	30165	9.80076	1.79697	0.18335	3.47491	0	0
934	39225	NM_130836_at	39224	9.80071	2.34681	0.239453	5.08697	0	0
935	35280	NM_020673_at	35279	9.79865	2.10539	0.214866	4.30315	0	0
936	24041	NM_001035247_at	24040	9.79851	2.23684	0.228284	4.71364	0	0
937	30168	NM_006360_at	30167	9.7939	2.34926	0.239869	5.09561	0	0
938	32873	NM_015560_at	32872	9.79223	2.35315	0.240308	5.10938	0	0
939	36465	NM_024116_at	36464	9.78825	2.24931	0.229797	4.75455	0	0
940	30853	NM_007114_at	30852	9.78008	2.04181	0.208773	4.11763	0	0
941	46356	XM_001128623_at	46355	9.7788	1.89659	0.193949	3.72332	0	0
942	28209	NM_004239_at	28208	9.77859	2.31795	0.237043	4.98622	0	0
943	23156	NM_001013439_at	23155	9.77752	2.29133	0.234347	4.89507	0	0
944	34457	NM_018372_at	34456	9.76585	2.44498	0.25036	5.44517	0	0
945	27242	NM_003187_at	27241	9.76381	1.96171	0.200916	3.89524	0	0
946	32509	NM_015070_at	32508	9.76019	1.99849	0.204759	3.99581	0	0
947	49960	XM_930470_at	49959	9.75944	1.97471	0.202339	3.9305	0	0
948	51657	XM_942656_at	51656	9.75944	1.97471	0.202339	3.9305	0	0
949	13870	4109804_at	13869	9.75897	1.97894	0.202782	3.94204	0	0
950	30545	NM_006768_at	30544	9.75721	2.00104	0.205083	4.00287	0	0
951	30114	NM_006303_at	30113	9.75675	1.78021	0.182459	3.43476	0	0
952	45510	XM_001126406_at	45509	9.75267	1.73045	0.177434	3.31832	0	0
953	35976	NM_022118_at	35975	9.74377	2.02604	0.207932	4.07285	0	0
954	28468	NM_004515_at	28467	9.74167	2.19009	0.224817	4.56335	0	0
955	42994	NM_182625_at	42993	9.74166	2.61851	0.268795	6.14116	0	0
956	26588	NM_002495_at	26587	9.73955	2.30577	0.236743	4.94432	0	0
957	43505	NM_198329_at	43504	9.73728	1.70539	0.175141	3.26118	0	0
958	36291	NM_023001_at	36290	9.73598	2.06845	0.212455	4.19437	0	0
959	41122	NM_153028_at	41121	9.73457	1.96136	0.201484	3.89428	0	0
960	32207	NM_014713_at	32206	9.73409	1.78104	0.182969	3.43673	0	0
961	11541	4100869_at	11540	9.731	2.90557	0.298589	7.49315	0	0
962	49951	XM_930419_at	49950	9.72496	3.40764	0.350401	10.6121	0	0
963	51558	XM_942121_at	51557	9.72496	3.40764	0.350401	10.6121	0	0
964	37658	NM_032168_at	37657	9.72137	1.87205	0.19257	3.66052	0	0
965	10735	4097787_at	10734	9.71804	2.4681	0.253971	5.53315	0	0
966	36120	NM_022494_at	36119	9.71682	1.86135	0.191559	3.63346	0	0
967	7260	4084381_at	7259	9.71437	2.09905	0.216077	4.28427	0	0
968	21694	NM_000983_at	21693	9.71147	2.37967	0.245037	5.20418	0	0
969	13128	4106989_at	13127	9.70988	2.65125	0.273046	6.2821	0	0
970	40601	NM_152295_at	40600	9.70741	2.12538	0.218944	4.36317	0	0
971	27239	NM_003184_at	27238	9.70701	2.23698	0.23045	4.71408	0	0
972	27972	NM_003981_at	27971	9.70678	2.90471	0.299246	7.48869	0	0
973	41099	NM_152995_at	41098	9.70371	1.78858	0.18432	3.45475	0	0
974	40252	NM_145261_at	40251	9.70271	1.90808	0.196655	3.7531	0	0
975	31976	NM_014426_at	31975	9.70257	1.82614	0.188213	3.54588	0	0
976	48729	XM_055481_at	48728	9.69739	2.11821	0.218431	4.34154	0	0
977	51504	XM_941796_at	51503	9.69739	2.11821	0.218431	4.34154	0	0
978	39417	NM_138270_at	39416	9.69271	1.82848	0.188645	3.55162	0	0
979	31390	NM_012433_at	31389	9.68886	1.67841	0.17323	3.20074	0	0
980	18994	4129324_at	18993	9.68878	1.68746	0.174167	3.2209	0	0
981	49450	XM_925826_at	49449	9.68736	1.74	0.179616	3.34036	0	0
982	49662	XM_927849_at	49661	9.68736	1.74	0.179616	3.34036	0	0
983	21290	NM_000535_at	21289	9.68447	1.60098	0.165314	3.03349	0	0
984	45117	NR_003085_at	45116	9.68447	1.60098	0.165314	3.03349	0	0
985	17932	4125365_at	17931	9.68253	1.93676	0.200026	3.82845	0	0
986	28782	NM_004850_at	28781	9.68069	2.31469	0.239104	4.97499	0	0
987	21246	NM_000489_at	21245	9.67446	1.83659	0.189839	3.57165	0	0
988	27198	NM_003137_at	27197	9.67335	1.90387	0.196816	3.74216	0	0
989	11359	4100163_at	11358	9.67267	1.95128	0.201731	3.86717	0	0
990	31432	NM_012485_at	31431	9.66467	3.37221	0.348921	10.3547	0	0
991	25420	NM_001211_at	25419	9.66354	2.83529	0.293401	7.13686	0	0
992	11980	4102585_at	11979	9.66055	2.39838	0.248265	5.27209	0	0
993	39224	NM_130835_at	39223	9.65688	2.32128	0.240376	4.99776	0	0
994	40347	NM_145702_at	40346	9.65653	2.35728	0.244113	5.12404	0	0
995	22583	NM_001007027_at	22582	9.65511	2.11601	0.21916	4.33493	0	0
996	36431	NM_024079_at	36430	9.65511	2.11601	0.21916	4.33493	0	0
997	40184	NM_145114_at	40183	9.65308	1.70066	0.176178	3.2505	0	0
998	30281	NM_006479_at	30280	9.64639	3.56682	0.369757	11.85	0	0
999	29004	NM_005089_at	29003	9.64493	1.70705	0.176989	3.26491	0	0
1000	52375	XR_015392_at	52374	9.64073	1.64989	0.171137	3.1381	0	0
1001	52593	XR_015642_at	52592	9.64073	1.64989	0.171137	3.1381	0	0
1002	29366	NM_005487_at	29365	9.63905	1.78582	0.185269	3.44813	0	0
1003	44883	NR_002578_at	44882	9.6354	2.37512	0.246499	5.18777	0	0
1004	34292	NM_018186_at	34291	9.63355	2.08623	0.216559	4.24638	0	0
1005	16556	4119890_at	16555	9.63094	2.00502	0.208186	4.01395	0	0
1006	21019	NM_000249_at	21018	9.62868	1.68692	0.175197	3.21968	0	0
1007	18025	4125677_at	18024	9.62723	1.86382	0.193599	3.6397	0	0
1008	4488	4073499_at	4487	9.61876	2.81003	0.29214	7.01298	0	0
1009	55255	XR_018553_at	55254	9.61553	1.87693	0.195198	3.67294	0	0
1010	33221	NM_016131_at	33220	9.61131	1.76246	0.183373	3.39275	0	0
1011	23968	NM_001033574_at	23967	9.6108	1.7432	0.181379	3.34776	0	0
1012	15544	4116138_at	15543	9.60974	1.81599	0.188974	3.521	0	0
1013	23433	NM_001018024_at	23432	9.60946	1.81151	0.188513	3.5101	0	0
1014	8282	4088452_at	8281	9.60451	2.18032	0.22701	4.53253	0	0
1015	39223	NM_130834_at	39222	9.60257	2.31365	0.24094	4.97138	0	0
1016	29286	NM_005399_at	29285	9.60216	1.89075	0.196909	3.70829	0	0
1017	39226	NM_130837_at	39225	9.59995	2.32325	0.242007	5.0046	0	0
1018	4845	4074933_at	4844	9.59881	1.75053	0.18237	3.36483	0	0
1019	26113	NM_001984_at	26112	9.59868	2.25081	0.234491	4.75949	0	0
1020	49630	XM_927535_at	49629	9.59666	2.63676	0.274758	6.21932	0	0
1021	24585	NM_001042473_at	24584	9.59612	2.22607	0.231977	4.67859	0	0
1022	24961	NM_001079524_at	24960	9.59531	1.83578	0.191321	3.56965	0	0
1023	24962	NM_001079525_at	24961	9.59531	1.83578	0.191321	3.56965	0	0
1024	54349	XR_017550_at	54348	9.59421	2.32701	0.242543	5.01764	0	0
1025	56280	XR_019648_at	56279	9.59421	2.32701	0.242543	5.01764	0	0
1026	43938	NM_199414_at	43937	9.59193	2.92003	0.304426	7.56864	0	0
1027	39221	NM_130832_at	39220	9.5869	2.30915	0.240865	4.9559	0	0
1028	43785	NM_198990_at	43784	9.58311	1.69293	0.176658	3.23314	0	0
1029	44600	NM_207661_at	44599	9.57562	1.84589	0.19277	3.59476	0	0
1030	45056	NR_002974_at	45055	9.57299	2.63057	0.274791	6.19272	0	0
1031	41987	NM_174887_at	41986	9.57101	2.47154	0.258232	5.54634	0	0
1032	39543	NM_138446_at	39542	9.56805	2.11547	0.221097	4.3333	0	0
1033	31084	NM_012063_at	31083	9.56738	2.18719	0.228609	4.55418	0	0
1034	26383	NM_002266_at	26382	9.56551	2.96702	0.310179	7.81919	0	0
1035	16224	4118637_at	16223	9.56297	2.79302	0.292066	6.93078	0	0
1036	32463	NM_015013_at	32462	9.56019	2.11703	0.221442	4.33799	0	0
1037	34116	NM_017987_at	34115	9.55812	1.81381	0.189767	3.5157	0	0
1038	5013	4075577_at	5012	9.55755	2.05929	0.215463	4.16782	0	0
1039	37722	NM_032284_at	37721	9.55709	1.62287	0.169808	3.07987	0	0
1040	36840	NM_024857_at	36839	9.55655	2.47386	0.258866	5.55529	0	0
1041	20758	4136115_at	20757	9.55612	1.59201	0.166596	3.01469	0	0
1042	45668	XM_001126809_at	45667	9.55482	2.74068	0.286838	6.68388	0	0
1043	50887	XM_938814_at	50886	9.55482	2.74068	0.286838	6.68388	0	0
1044	34528	NM_018453_at	34527	9.55456	1.9012	0.198984	3.73524	0	0
1045	31108	NM_012095_at	31107	9.5497	1.61289	0.168894	3.05863	0	0
1046	6553	4081662_at	6552	9.54941	1.94804	0.203996	3.85851	0	0
1047	43152	NM_182943_at	43151	9.54925	3.19179	0.334245	9.13745	0	0
1048	17296	4122825_at	17295	9.54891	3.68377	0.385779	12.8507	0	0
1049	35969	NM_022111_at	35968	9.54782	2.95884	0.309897	7.775	0	0
1050	26970	NM_002895_at	26969	9.53767	2.02967	0.212806	4.08312	0	0
1051	22682	NM_001007_at	22681	9.53207	1.72127	0.180576	3.29726	0	0
1052	33617	NM_016652_at	33616	9.5319	1.68433	0.176705	3.21392	0	0
1053	34441	NM_018356_at	34440	9.53145	1.6858	0.176867	3.21718	0	0
1054	33411	NM_016374_at	33410	9.53088	2.02034	0.211979	4.0568	0	0
1055	34254	NM_018144_at	34253	9.53063	2.2586	0.236983	4.78527	0	0
1056	40507	NM_148894_at	40506	9.52856	2.05318	0.215476	4.15019	0	0
1057	33711	NM_017454_at	33710	9.52431	1.91825	0.201405	3.77964	0	0
1058	33659	NM_016940_at	33658	9.52391	2.29603	0.241081	4.91104	0	0
1059	21688	NM_000976_at	21687	9.52126	1.9274	0.202431	3.8037	0	0
1060	44699	NR_000009_at	44698	9.52012	2.19854	0.230936	4.59014	0	0
1061	29034	NM_005121_at	29033	9.51551	1.72425	0.181205	3.30409	0	0
1062	21649	NM_000935_at	21648	9.51531	3.18473	0.334696	9.09286	0	0
1063	33087	NM_015972_at	33086	9.51372	1.88596	0.198236	3.696	0	0
1064	25444	NM_001237_at	25443	9.50368	2.77491	0.291983	6.84433	0	0
1065	40172	NM_145063_at	40171	9.50243	1.96469	0.206757	3.90329	0	0
1066	50880	XM_938755_at	50879	9.49957	2.01613	0.212233	4.04496	0	0
1067	39216	NM_130809_at	39215	9.49489	1.77121	0.186544	3.4134	0	0
1068	32378	NM_014910_at	32377	9.48785	1.65531	0.174466	3.14991	0	0
1069	40387	NM_145810_at	40386	9.48674	2.46366	0.259695	5.51615	0	0
1070	31176	NM_012177_at	31175	9.48496	2.50162	0.263746	5.66323	0	0
1071	30627	NM_006854_at	30626	9.48291	1.81415	0.191307	3.51651	0	0
1072	23030	NM_001012410_at	23029	9.4805	2.97511	0.313814	7.86318	0	0
1073	43937	NM_199413_at	43936	9.47985	2.831	0.298633	7.11567	0	0
1074	26175	NM_002047_at	26174	9.47976	1.86117	0.196331	3.63302	0	0
1075	40343	NM_145697_at	40342	9.47648	3.44691	0.363733	10.9049	0	0
1076	34530	NM_018455_at	34529	9.47561	2.52812	0.266803	5.7682	0	0
1077	47874	XM_001132378_at	47873	9.47049	1.83795	0.194071	3.57501	0	0
1078	9688	4093842_at	9687	9.46862	2.66813	0.281787	6.35607	0	0
1079	42232	NM_176824_at	42231	9.46615	1.80053	0.190207	3.48348	0	0
1080	30771	NM_007019_at	30770	9.4604	2.66215	0.281399	6.32976	0	0
1081	37673	NM_032194_at	37672	9.46003	2.72791	0.288361	6.62493	0	0
1082	23877	NM_001032373_at	23876	9.4591	1.79014	0.18925	3.45847	0	0
1083	21396	NM_000661_at	21395	9.45088	1.90692	0.201772	3.75008	0	0
1084	53501	XR_016646_at	53500	9.44975	1.8544	0.196238	3.61602	0	0
1085	44933	NR_002745_at	44932	9.44913	3.93554	0.416497	15.3008	0	0
1086	38636	NM_052865_at	38635	9.44811	1.94839	0.20622	3.85945	0	0
1087	29558	NM_005687_at	29557	9.4458	2.14053	0.226612	4.40925	0	0
1088	40894	NM_152641_at	40893	9.44498	1.60371	0.169795	3.03923	0	0
1089	26869	NM_002791_at	26868	9.44426	1.8315	0.193927	3.55907	0	0
1090	45458	XM_001126254_at	45457	9.44348	2.04139	0.216169	4.11643	0	0
1091	47500	XM_001131526_at	47499	9.44348	2.04139	0.216169	4.11643	0	0
1092	47637	XM_001131842_at	47636	9.44348	2.04139	0.216169	4.11643	0	0
1093	45095	NR_003033_at	45094	9.4418	2.49143	0.263872	5.62334	0	0
1094	18055	4125790_at	18054	9.44017	2.38699	0.252855	5.23066	0	0
1095	41328	NM_153649_at	41327	9.43333	1.64971	0.174881	3.1377	0	0
1096	50591	XM_937205_at	50590	9.42435	1.91666	0.203373	3.77547	0	0
1097	24721	NM_001044723_at	24720	9.42015	1.97982	0.210169	3.94444	0	0
1098	28343	NM_004384_at	28342	9.42015	1.97982	0.210169	3.94444	0	0
1099	31694	NM_014038_at	31693	9.41935	2.22278	0.23598	4.66793	0	0
1100	27158	NM_003094_at	27157	9.41725	1.99963	0.212337	3.99898	0	0
1101	28863	NM_004939_at	28862	9.41571	2.15742	0.22913	4.46116	0	0
1102	8691	4090113_at	8690	9.4148	4.25504	0.451952	19.0939	0	0
1103	49033	XM_371575_at	49032	9.41419	1.97298	0.209575	3.92579	0	0
1104	29561	NM_005690_at	29560	9.41015	2.1563	0.229146	4.45769	0	0
1105	36039	NM_022346_at	36038	9.40839	3.23587	0.343934	9.4209	0	0
1106	34832	NM_019069_at	34831	9.40711	1.61656	0.171845	3.06644	0	0
1107	40603	NM_152298_at	40602	9.40589	1.93848	0.206092	3.83302	0	0
1108	35909	NM_022037_at	35908	9.39634	1.94486	0.20698	3.85	0	0
1109	36027	NM_022173_at	36026	9.39364	1.91091	0.203426	3.76046	0	0
1110	22792	NM_001008800_at	22791	9.39157	1.99996	0.212953	3.9999	0	0
1111	20674	4135787_at	20673	9.39121	1.85146	0.197148	3.60865	0	0
1112	29043	NM_005131_at	29042	9.38984	1.77961	0.189525	3.43332	0	0
1113	13497	4108354_at	13496	9.37671	1.98074	0.211241	3.94696	0	0
1114	34013	NM_017858_at	34012	9.37467	2.67588	0.285437	6.39029	0	0
1115	26912	NM_002835_at	26911	9.37377	1.94095	0.207062	3.83959	0	0
1116	23032	NM_001012412_at	23031	9.37284	2.90508	0.309946	7.49057	0	0
1117	44127	NM_203291_at	44126	9.37249	2.68139	0.286091	6.41472	0	0
1118	34845	NM_019083_at	34844	9.37119	2.25021	0.24012	4.75752	0	0
1119	22796	NM_001008883_at	22795	9.36857	1.98403	0.211775	3.95595	0	0
1120	29833	NM_005998_at	29832	9.36857	1.98403	0.211775	3.95595	0	0
1121	30006	NM_006191_at	30005	9.36658	1.97849	0.211229	3.94081	0	0
1122	18162	4126224_at	18161	9.36522	2.87388	0.306868	7.33036	0	0
1123	40555	NM_152227_at	40554	9.35469	1.75003	0.187075	3.36365	0	0
1124	38546	NM_033527_at	38545	9.35034	1.71991	0.183941	3.29417	0	0
1125	38550	NM_033532_at	38549	9.35034	1.71991	0.183941	3.29417	0	0
1126	44120	NM_203284_at	44119	9.3492	1.74301	0.186434	3.34733	0	0
1127	23949	NM_001033522_at	23948	9.34501	1.79574	0.19216	3.47194	0	0
1128	36407	NM_024051_at	36406	9.33388	2.17689	0.233224	4.52176	0	0
1129	21971	NM_001002800_at	21970	9.33342	2.78358	0.298238	6.88558	0	0
1130	24794	NM_001068_at	24793	9.33326	2.06526	0.22128	4.1851	0	0
1131	52841	XR_015914_at	52840	9.33115	2.16545	0.232067	4.48607	0	0
1132	12294	4103861_at	12293	9.32526	1.88572	0.202217	3.69538	0	0
1133	38938	NM_080476_at	38937	9.32505	1.87934	0.201536	3.67906	0	0
1134	36191	NM_022757_at	36190	9.32163	2.0909	0.224306	4.26013	0	0
1135	940	4059750_at	939	9.31745	1.81921	0.195248	3.52888	0	0
1136	37010	NM_025155_at	37009	9.31537	1.59947	0.171703	3.03033	0	0
1137	38874	NM_058216_at	38873	9.3123	2.81832	0.302644	7.05338	0	0
1138	27850	NM_003850_at	27849	9.31221	2.27214	0.243995	4.83038	0	0
1139	50839	XM_938514_at	50838	9.30553	1.85668	0.199524	3.62173	0	0
1140	33098	NM_015984_at	33097	9.30399	2.39926	0.257875	5.27534	0	0
1141	26727	NM_002637_at	26726	9.30296	2.15173	0.231296	4.44362	0	0
1142	34295	NM_018190_at	34294	9.30224	1.81493	0.195107	3.51843	0	0
1143	45151	NR_003140_at	45150	9.29501	2.46416	0.265106	5.51807	0	0
1144	17683	4124431_at	17682	9.29304	1.82393	0.196269	3.54045	0	0
1145	31431	NM_012484_at	31430	9.29216	3.2592	0.350747	9.57449	0	0
1146	265	4057249_at	264	9.28992	2.42482	0.261016	5.36962	0	0
1147	25712	NM_001539_at	25711	9.28962	2.35415	0.253418	5.11294	0	0
1148	16195	4118531_at	16194	9.28801	1.92508	0.207265	3.79757	0	0
1149	24083	NM_001037278_at	24082	9.28532	2.01946	0.217489	4.05432	0	0
1150	19345	4130708_at	19344	9.28388	4.88958	0.526674	29.6421	0	0
1151	38110	NM_032842_at	38109	9.28334	1.81231	0.195221	3.51203	0	0
1152	26732	NM_002642_at	26731	9.28258	2.14827	0.23143	4.43296	0	0
1153	41368	NM_153747_at	41367	9.28258	2.14827	0.23143	4.43296	0	0
1154	2595	4066143_at	2594	9.28167	1.81496	0.195542	3.5185	0	0
1155	49953	XM_930426_at	49952	9.27652	1.93311	0.208387	3.81877	0	0
1156	50318	XM_934782_at	50317	9.27652	1.93311	0.208387	3.81877	0	0
1157	51577	XM_942204_at	51576	9.27652	1.93311	0.208387	3.81877	0	0
1158	52096	XM_945789_at	52095	9.27652	1.93311	0.208387	3.81877	0	0
1159	42694	NM_181527_at	42693	9.27309	1.91284	0.206278	3.76549	0	0
1160	30611	NM_006838_at	30610	9.26838	1.98158	0.2138	3.94926	0	0
1161	29445	NM_005566_at	29444	9.26729	1.90119	0.20515	3.7352	0	0
1162	36280	NM_022913_at	36279	9.25772	1.94176	0.209745	3.84175	0	0
1163	39796	NM_139118_at	39795	9.25719	1.62118	0.175127	3.07628	0	0
1164	30978	NM_007262_at	30977	9.25671	1.72669	0.186533	3.30967	0	0
1165	36814	NM_024824_at	36813	9.25653	1.75361	0.189446	3.37202	0	0
1166	36254	NM_022841_at	36253	9.24827	1.70902	0.184794	3.26939	0	0
1167	9393	4092804_at	9392	9.24696	1.88779	0.204153	3.70069	0	0
1168	55076	XR_018371_at	55075	9.2464	2.04684	0.221366	4.132	0	0
1169	30408	NM_006620_at	30407	9.24613	2.00852	0.217229	4.02371	0	0
1170	54164	XR_017355_at	54163	9.24248	2.39171	0.258773	5.24778	0	0
1171	56036	XR_019364_at	56035	9.24248	2.39171	0.258773	5.24778	0	0
1172	52999	XR_016082_at	52998	9.23962	1.83007	0.198068	3.55555	0	0
1173	53004	XR_016088_at	53003	9.23962	1.83007	0.198068	3.55555	0	0
1174	39861	NM_139267_at	39860	9.23535	1.79748	0.194631	3.47613	0	0
1175	41073	NM_152912_at	41072	9.23479	1.86168	0.201594	3.6343	0	0
1176	26969	NM_002894_at	26968	9.2343	2.59841	0.281387	6.0562	0	0
1177	32860	NM_015542_at	32859	9.23394	1.79728	0.194638	3.47564	0	0
1178	30975	NM_007259_at	30974	9.2294	1.72366	0.186757	3.30272	0	0
1179	22686	NM_001008215_at	22685	9.22835	2.15053	0.233035	4.43991	0	0
1180	27793	NM_003792_at	27792	9.22124	1.7517	0.189963	3.36754	0	0
1181	2638	4066321_at	2637	9.21987	2.71857	0.29486	6.5822	0	0
1182	32695	NM_015323_at	32694	9.21877	1.9513	0.211666	3.86723	0	0
1183	30965	NM_007246_at	30964	9.21797	2.03084	0.220314	4.08644	0	0
1184	29098	NM_005192_at	29097	9.21728	3.25738	0.3534	9.56248	0	0
1185	33431	NM_016410_at	33430	9.21526	2.19647	0.238352	4.58358	0	0
1186	43898	NM_199294_at	43897	9.2122	1.91135	0.207481	3.76162	0	0
1187	34526	NM_018451_at	34525	9.20528	2.28565	0.248298	4.87584	0	0
1188	35670	NM_021204_at	35669	9.20317	1.76917	0.192235	3.40857	0	0
1189	25994	NM_001861_at	25993	9.20129	1.88266	0.204608	3.68753	0	0
1190	11434	4100426_at	11433	9.19825	2.06675	0.224689	4.18941	0	0
1191	30077	NM_006265_at	30076	9.1947	2.25813	0.245591	4.78372	0	0
1192	26866	NM_002788_at	26865	9.19465	1.75726	0.191118	3.38057	0	0
1193	40548	NM_152132_at	40547	9.19465	1.75726	0.191118	3.38057	0	0
1194	38986	NM_080632_at	38985	9.19437	1.74454	0.18974	3.35088	0	0
1195	38575	NM_033632_at	38574	9.19306	1.82554	0.198578	3.54439	0	0
1196	34175	NM_018060_at	34174	9.19069	1.88286	0.204866	3.68806	0	0
1197	26900	NM_002823_at	26899	9.18618	2.08187	0.226631	4.23356	0	0
1198	52421	XR_015446_at	52420	9.18549	2.23671	0.243504	4.7132	0	0
1199	15879	4117427_at	15878	9.17597	1.83435	0.199908	3.5661	0	0
1200	33485	NM_016489_at	33484	9.17591	2.48549	0.270871	5.60024	0	0
1201	25601	NM_001412_at	25600	9.17473	2.15135	0.234486	4.44242	0	0
1202	33471	NM_016472_at	33470	9.16959	1.88498	0.205569	3.69348	0	0
1203	5329	4076815_at	5328	9.16709	1.87314	0.204333	3.66328	0	0
1204	36662	NM_024641_at	36661	9.1659	2.14467	0.233983	4.4219	0	0
1205	43870	NM_199229_at	43869	9.16567	1.81191	0.197684	3.51107	0	0
1206	28246	NM_004279_at	28245	9.16486	1.71798	0.187453	3.28975	0	0
1207	28068	NM_004087_at	28067	9.15693	2.12278	0.231822	4.35532	0	0
1208	25344	NM_001126_at	25343	9.15523	1.85681	0.202814	3.62206	0	0
1209	40320	NM_145647_at	40319	9.1527	2.37002	0.258942	5.16949	0	0
1210	33828	NM_017641_at	33827	9.14956	2.82831	0.30912	7.10243	0	0
1211	29273	NM_005385_at	29272	9.14918	1.76228	0.192617	3.39235	0	0
1212	11779	4101731_at	11778	9.14725	1.72376	0.188446	3.30296	0	0
1213	29037	NM_005124_at	29036	9.14538	1.67375	0.183015	3.19042	0	0
1214	43899	NM_199295_at	43898	9.14511	1.90775	0.208609	3.75225	0	0
1215	41558	NM_172164_at	41557	9.13993	1.81725	0.198825	3.52409	0	0
1216	26575	NM_002482_at	26574	9.13794	1.85161	0.202629	3.60903	0	0
1217	35107	NM_020342_at	35106	9.13731	2.12664	0.232742	4.367	0	0
1218	25008	NM_001079864_at	25007	9.1361	1.98684	0.217471	3.96367	0	0
1219	29539	NM_005667_at	29538	9.13448	1.60508	0.175717	3.04213	0	0
1220	37642	NM_032145_at	37641	9.13434	1.87768	0.205563	3.67483	0	0
1221	30156	NM_006348_at	30155	9.13374	1.6637	0.182148	3.16827	0	0
1222	38963	NM_080599_at	38962	9.12979	1.76195	0.19299	3.39157	0	0
1223	26028	NM_001895_at	26027	9.12918	1.6293	0.178472	3.09363	0	0
1224	36263	NM_022894_at	36262	9.12804	1.63542	0.179165	3.10678	0	0
1225	25480	NM_001274_at	25479	9.12491	2.63439	0.288703	6.20912	0	0
1226	11613	4101135_at	11612	9.12309	2.03089	0.22261	4.08657	0	0
1227	11064	4099076_at	11063	9.12238	3.12805	0.342898	8.74251	0	0
1228	28221	NM_004253_at	28220	9.12149	2.07936	0.227963	4.2262	0	0
1229	9192	4091956_at	9191	9.11995	2.21501	0.242875	4.64284	0	0
1230	28256	NM_004289_at	28255	9.11994	2.3919	0.262271	5.24847	0	0
1231	46657	XM_001129401_at	46656	9.11119	2.42717	0.266395	5.37838	0	0
1232	23844	NM_001031812_at	23843	9.10946	2.00915	0.220556	4.02544	0	0
1233	24720	NM_001044722_at	24719	9.10946	2.00915	0.220556	4.02544	0	0
1234	43012	NM_182648_at	43011	9.10548	1.98767	0.218294	3.96597	0	0
1235	30812	NM_007062_at	30811	9.103	1.86919	0.205338	3.65329	0	0
1236	50146	XM_932585_at	50145	9.10118	1.63592	0.179748	3.10785	0	0
1237	51392	XM_941283_at	51391	9.10118	1.63592	0.179748	3.10785	0	0
1238	31299	NM_012319_at	31298	9.09669	2.41004	0.264936	5.3149	0	0
1239	26911	NM_002834_at	26910	9.09639	2.12055	0.23312	4.34858	0	0
1240	32043	NM_014500_at	32042	9.09426	1.91108	0.210141	3.76091	0	0
1241	33710	NM_017453_at	33709	9.0863	1.6775	0.184618	3.19872	0	0
1242	33851	NM_017667_at	33850	9.08353	2.05965	0.226746	4.16886	0	0
1243	35875	NM_021964_at	35874	9.08331	1.62621	0.179032	3.087	0	0
1244	31819	NM_014248_at	31818	9.08246	1.8927	0.208391	3.71329	0	0
1245	42827	NM_181800_at	42826	9.07303	2.53555	0.27946	5.79797	0	0
1246	26000	NM_001867_at	25999	9.07074	2.08459	0.229814	4.24153	0	0
1247	44128	NM_203292_at	44127	9.06851	2.56709	0.283077	5.92613	0	0
1248	8354	4088718_at	8353	9.06515	2.12182	0.234064	4.35243	0	0
1249	35560	NM_021067_at	35559	9.06027	2.55418	0.28191	5.87332	0	0
1250	31134	NM_012124_at	31133	9.05727	2.00277	0.221123	4.00769	0	0
1251	30985	NM_007269_at	30984	9.05457	2.01971	0.22306	4.05503	0	0
1252	52959	XR_016039_at	52958	9.05255	1.59348	0.176025	3.01776	0	0
1253	32203	NM_014709_at	32202	9.05089	1.6185	0.178822	3.07055	0	0
1254	49214	XM_376679_at	49213	9.04589	1.71422	0.189503	3.2812	0	0
1255	49283	XM_379933_at	49282	9.04589	1.71422	0.189503	3.2812	0	0
1256	50947	XM_939098_at	50946	9.04589	1.71422	0.189503	3.2812	0	0
1257	48770	XM_069743_at	48769	9.04552	1.60275	0.177188	3.03722	0	0
1258	50695	XM_937770_at	50694	9.04552	1.60275	0.177188	3.03722	0	0
1259	51519	XM_941907_at	51518	9.04121	1.82103	0.201415	3.53334	0	0
1260	23132	NM_001012991_at	23131	9.03995	1.64401	0.181861	3.12534	0	0
1261	24033	NM_001034_at	24032	9.03976	2.49054	0.27551	5.6199	0	0
1262	31750	NM_014161_at	31749	9.02585	2.19361	0.243037	4.57449	0	0
1263	32241	NM_014749_at	32240	9.02217	1.59992	0.177332	3.03126	0	0
1264	21173	NM_000408_at	21172	9.01665	2.16109	0.239677	4.47252	0	0
1265	38654	NM_052888_at	38653	9.01164	2.07213	0.229939	4.20506	0	0
1266	29838	NM_006003_at	29837	9.0106	4.02646	0.446859	16.2962	0	0
1267	26203	NM_002078_at	26202	9.01048	2.03676	0.226044	4.10324	0	0
1268	22030	NM_001003681_at	22029	9.00828	1.66999	0.185384	3.18213	0	0
1269	15774	4117054_at	15773	9.00714	1.58842	0.176351	3.0072	0	0
1270	53739	XR_016898_at	53738	9.00712	1.70938	0.189781	3.27019	0	0
1271	54976	XR_018269_at	54975	9.00712	1.70938	0.189781	3.27019	0	0
1272	34401	NM_018309_at	34400	9.00604	1.85679	0.206171	3.622	0	0
1273	39568	NM_138484_at	39567	9.00572	2.7924	0.310069	6.92781	0	0
1274	31618	NM_013448_at	31617	9.00263	1.96117	0.217844	3.89378	0	0
1275	32721	NM_015355_at	32720	9.00039	1.97007	0.218887	3.91787	0	0
1276	37383	NM_031371_at	37382	8.99866	1.8738	0.208231	3.66498	0	0
1277	33060	NM_015939_at	33059	8.9986	1.75112	0.1946	3.3662	0	0
1278	25298	NM_001083112_at	25297	8.99496	2.12935	0.236727	4.37519	0	0
1279	28223	NM_004255_at	28222	8.99452	1.7118	0.190316	3.27569	0	0
1280	37901	NM_032509_at	37900	8.99419	1.6687	0.185531	3.17929	0	0
1281	33685	NM_017423_at	33684	8.99042	2.61934	0.291348	6.14469	0	0
1282	42315	NM_177937_at	42314	8.9891	3.20508	0.356552	9.22199	0	0
1283	47871	XM_001132372_at	47870	8.98852	1.94375	0.216248	3.84704	0	0
1284	27500	NM_003477_at	27499	8.98648	2.03441	0.226386	4.09656	0	0
1285	14299	4111486_at	14298	8.98632	1.99415	0.221909	3.9838	0	0
1286	35120	NM_020357_at	35119	8.98187	1.98863	0.221405	3.96861	0	0
1287	26511	NM_002413_at	26510	8.97877	2.22597	0.247914	4.67824	0	0
1288	31510	NM_013314_at	31509	8.97822	2.05727	0.22914	4.16199	0	0
1289	23876	NM_001032372_at	23875	8.97804	1.61045	0.179376	3.05347	0	0
1290	44599	NM_207660_at	44598	8.97683	1.66582	0.185568	3.17293	0	0
1291	33909	NM_017741_at	33908	8.97378	1.69545	0.188934	3.23878	0	0
1292	33059	NM_015938_at	33058	8.96989	2.30906	0.257424	4.95561	0	0
1293	37003	NM_025146_at	37002	8.96955	1.71877	0.191623	3.29156	0	0
1294	1994	4063752_at	1993	8.96747	1.69695	0.189234	3.24216	0	0
1295	38112	NM_032844_at	38111	8.96657	2.37675	0.265068	5.19367	0	0
1296	29375	NM_005496_at	29374	8.96257	2.69899	0.30114	6.49347	0	0
1297	7524	4085509_at	7523	8.96243	2.05482	0.229271	4.15493	0	0
1298	45842	XM_001127274_at	45841	8.9616	2.11041	0.235494	4.31813	0	0
1299	54436	XR_017639_at	54435	8.95861	1.80042	0.200971	3.48322	0	0
1300	35616	NM_021141_at	35615	8.95754	1.65777	0.18507	3.15529	0	0
1301	24239	NM_001039613_at	24238	8.95623	1.83687	0.205094	3.57235	0	0
1302	34137	NM_018017_at	34136	8.95587	2.17803	0.243196	4.52535	0	0
1303	33196	NM_016099_at	33195	8.95108	1.7644	0.197116	3.39734	0	0
1304	4682	4074300_at	4681	8.95056	1.94723	0.217553	3.85632	0	0
1305	28357	NM_004398_at	28356	8.94692	1.95702	0.218736	3.88258	0	0
1306	25998	NM_001865_at	25997	8.94069	2.19098	0.245057	4.56614	0	0
1307	30271	NM_006469_at	30270	8.94007	1.95579	0.218767	3.87929	0	0
1308	45322	XM_001125915_at	45321	8.93989	1.76343	0.197254	3.39505	0	0
1309	33269	NM_016200_at	33268	8.93549	1.82426	0.204159	3.54125	0	0
1310	33557	NM_016578_at	33556	8.93466	1.87194	0.209514	3.66023	0	0
1311	40344	NM_145698_at	40343	8.93401	2.02802	0.227	4.07845	0	0
1312	44421	NM_207118_at	44420	8.92439	2.316	0.259514	4.97951	0	0
1313	46239	XM_001128327_at	46238	8.92035	2.37551	0.266302	5.18919	0	0
1314	46258	XM_001128373_at	46257	8.92035	2.37551	0.266302	5.18919	0	0
1315	33352	NM_016304_at	33351	8.91948	2.10102	0.235554	4.29012	0	0
1316	23072	NM_001012651_at	23071	8.91891	1.71731	0.192547	3.28822	0	0
1317	31490	NM_013285_at	31489	8.91002	1.64326	0.184429	3.12372	0	0
1318	43287	NM_194260_at	43286	8.90575	1.83151	0.205655	3.55909	0	0
1319	34156	NM_018040_at	34155	8.90343	1.71092	0.192164	3.27369	0	0
1320	5817	4078837_at	5816	8.8986	2.17398	0.244306	4.51268	0	0
1321	31290	NM_012310_at	31289	8.89661	2.49625	0.280584	5.64216	0	0
1322	26573	NM_002480_at	26572	8.89659	1.90311	0.213915	3.74019	0	0
1323	26618	NM_002525_at	26617	8.89655	1.59093	0.178826	3.01244	0	0
1324	17894	4125247_at	17893	8.89519	1.9636	0.220749	3.90035	0	0
1325	29147	NM_005245_at	29146	8.89427	2.39881	0.269702	5.27367	0	0
1326	31594	NM_013411_at	31593	8.89217	1.84144	0.207085	3.58367	0	0
1327	24609	NM_001042519_at	24608	8.8877	1.81246	0.203929	3.5124	0	0
1328	33534	NM_016548_at	33533	8.88161	3.16922	0.35683	8.9956	0	0
1329	32888	NM_015590_at	32887	8.88144	2.03428	0.229048	4.09617	0	0
1330	27873	NM_003875_at	27872	8.88115	2.01086	0.226419	4.03023	0	0
1331	37251	NM_030918_at	37250	8.88002	2.01265	0.226649	4.03523	0	0
1332	1527	4061943_at	1526	8.87845	2.17927	0.245456	4.52924	0	0
1333	23948	NM_001033521_at	23947	8.87285	1.74565	0.19674	3.35345	0	0
1334	18774	4128553_at	18773	8.87251	2.05165	0.231236	4.14579	0	0
1335	33709	NM_017452_at	33708	8.86645	1.74446	0.196748	3.3507	0	0
1336	37321	NM_031218_at	37320	8.86538	2.17838	0.245718	4.52646	0	0
1337	30987	NM_007271_at	30986	8.8652	2.06212	0.232608	4.17598	0	0
1338	27511	NM_003489_at	27510	8.85963	2.61233	0.294858	6.1149	0	0
1339	21660	NM_000946_at	21659	8.85723	2.43132	0.274501	5.39385	0	0
1340	23029	NM_001012409_at	23028	8.85626	2.99575	0.338264	7.97647	0	0
1341	27389	NM_003359_at	27388	8.85191	3.13848	0.354554	8.80594	0	0
1342	28769	NM_004837_at	28768	8.85118	1.93287	0.218375	3.81815	0	0
1343	33358	NM_016310_at	33357	8.84803	2.42279	0.273823	5.36207	0	0
1344	18011	4125604_at	18010	8.8438	1.68807	0.190876	3.22226	0	0
1345	45664	XM_001126793_at	45663	8.84204	1.92152	0.217317	3.78822	0	0
1346	38628	NM_052857_at	38627	8.84136	1.59257	0.180128	3.01587	0	0
1347	27378	NM_003345_at	27377	8.8396	1.84502	0.208723	3.59259	0	0
1348	26947	NM_002870_at	26946	8.83805	2.03452	0.2302	4.09687	0	0
1349	52522	XR_015565_at	52521	8.83776	2.44622	0.276791	5.44985	0	0
1350	52768	XR_015836_at	52767	8.83776	2.44622	0.276791	5.44985	0	0
1351	32094	NM_014584_at	32093	8.83702	2.63176	0.29781	6.1978	0	0
1352	31083	NM_012062_at	31082	8.83456	2.01477	0.228055	4.04116	0	0
1353	45646	XM_001126756_at	45645	8.83176	1.91617	0.216963	3.77419	0	0
1354	45659	XM_001126781_at	45658	8.83176	1.91617	0.216963	3.77419	0	0
1355	19497	4131288_at	19496	8.83155	2.76469	0.313047	6.79603	0	0
1356	46228	XM_001128293_at	46227	8.82936	1.62691	0.184261	3.0885	0	0
1357	47998	XM_001132701_at	47997	8.82936	1.62691	0.184261	3.0885	0	0
1358	37319	NM_031216_at	37318	8.82929	1.92318	0.217819	3.79259	0	0
1359	47144	XM_001130692_at	47143	8.82911	2.22333	0.251818	4.6697	0	0
1360	24299	NM_001039841_at	24298	8.82451	2.33321	0.264401	5.03925	0	0
1361	40572	NM_152261_at	40571	8.82431	2.02941	0.22998	4.08239	0	0
1362	40085	NM_144963_at	40084	8.81676	1.64833	0.186955	3.13471	0	0
1363	42795	NM_181733_at	42794	8.81344	1.628	0.184718	3.09084	0	0
1364	35210	NM_020463_at	35209	8.80871	1.83243	0.208024	3.56136	0	0
1365	28432	NM_004477_at	28431	8.795	1.63148	0.185501	3.0983	0	0
1366	25546	NM_001349_at	25545	8.79467	1.8025	0.204953	3.48823	0	0
1367	27919	NM_003925_at	27918	8.78786	1.64275	0.186935	3.12261	0	0
1368	40056	NM_144721_at	40055	8.78736	1.61717	0.184033	3.06772	0	0
1369	43825	NM_199126_at	43824	8.78497	2.1255	0.241948	4.36355	0	0
1370	41912	NM_173685_at	41911	8.78346	1.6529	0.188183	3.14465	0	0
1371	35420	NM_020865_at	35419	8.78098	1.99642	0.227357	3.99009	0	0
1372	12884	4106050_at	12883	8.77705	2.5768	0.293584	5.96613	0	0
1373	36692	NM_024675_at	36691	8.77642	1.7077	0.194578	3.2664	0	0
1374	32178	NM_014679_at	32177	8.77533	1.69151	0.192758	3.22995	0	0
1375	30183	NM_006375_at	30182	8.77349	1.67339	0.190732	3.18963	0	0
1376	27414	NM_003384_at	27413	8.76577	2.43784	0.278109	5.41829	0	0
1377	37566	NM_032026_at	37565	8.76373	2.01351	0.229755	4.03763	0	0
1378	32343	NM_014873_at	32342	8.76242	2.45656	0.280352	5.48906	0	0
1379	29596	NM_005731_at	29595	8.75667	1.96321	0.224196	3.89929	0	0
1380	31382	NM_012425_at	31381	8.75652	1.85789	0.212173	3.62478	0	0
1381	31128	NM_012117_at	31127	8.7494	2.20094	0.251554	4.5978	0	0
1382	23742	NM_001029998_at	23741	8.74923	1.61493	0.18458	3.06297	0	0
1383	19925	4132874_at	19924	8.7487	1.87905	0.21478	3.67832	0	0
1384	26529	NM_002431_at	26528	8.74749	1.67857	0.191892	3.20111	0	0
1385	24020	NM_001034844_at	24019	8.74583	1.65763	0.189534	3.15498	0	0
1386	28718	NM_004782_at	28717	8.74522	1.65949	0.189759	3.15904	0	0
1387	45633	XM_001126721_at	45632	8.74032	1.88458	0.215619	3.69245	0	0
1388	10018	4095075_at	10017	8.73957	1.672	0.191314	3.18656	0	0
1389	38222	NM_033000_at	38221	8.73866	1.77241	0.202823	3.41623	0	0
1390	37064	NM_025234_at	37063	8.737	1.79472	0.205416	3.46947	0	0
1391	29642	NM_005783_at	29641	8.73267	2.06908	0.236936	4.1962	0	0
1392	7735	4086318_at	7734	8.7316	2.68081	0.307025	6.41218	0	0
1393	3375	4069190_at	3374	8.73092	1.7764	0.20346	3.42569	0	0
1394	17114	4122168_at	17113	8.7249	2.95047	0.338166	7.72998	0	0
1395	36640	NM_024617_at	36639	8.72042	1.81443	0.208067	3.5172	0	0
1396	29857	NM_006024_at	29856	8.72029	1.89289	0.217067	3.71378	0	0
1397	35688	NM_021227_at	35687	8.72014	1.87628	0.215166	3.67127	0	0
1398	22606	NM_001007157_at	22605	8.71795	1.90595	0.218624	3.74757	0	0
1399	43288	NM_194261_at	43287	8.71703	1.70291	0.195354	3.25557	0	0
1400	13172	4107139_at	13171	8.71501	2.13869	0.245403	4.40361	0	0
1401	44160	NM_203350_at	44159	8.71455	1.76397	0.202417	3.39632	0	0
1402	24094	NM_001037328_at	24093	8.71296	1.7153	0.196867	3.28364	0	0
1403	28553	NM_004602_at	28552	8.71296	1.7153	0.196867	3.28364	0	0
1404	33014	NM_015884_at	33013	8.70847	1.68612	0.193619	3.21791	0	0
1405	6321	4080856_at	6320	8.70843	2.33981	0.268684	5.06237	0	0
1406	23932	NM_001033088_at	23931	8.70356	1.68519	0.193621	3.21583	0	0
1407	32910	NM_015630_at	32909	8.70231	1.82189	0.209357	3.53545	0	0
1408	38673	NM_052911_at	38672	8.69927	2.09599	0.240939	4.2752	0	0
1409	38081	NM_032810_at	38080	8.69914	1.64897	0.189555	3.1361	0	0
1410	43286	NM_194259_at	43285	8.69365	1.67257	0.19239	3.18782	0	0
1411	26183	NM_002056_at	26182	8.68774	2.09315	0.240931	4.26678	0	0
1412	1379	4061388_at	1378	8.68235	1.64119	0.189026	3.11923	0	0
1413	29338	NM_005455_at	29337	8.67782	1.78347	0.205521	3.44254	0	0
1414	30840	NM_007100_at	30839	8.67694	1.66093	0.191419	3.16221	0	0
1415	24630	NM_001042551_at	24629	8.6753	2.86051	0.32973	7.26272	0	0
1416	30248	NM_006444_at	30247	8.6753	2.86051	0.32973	7.26272	0	0
1417	33550	NM_016570_at	33549	8.6732	2.17009	0.250206	4.50051	0	0
1418	43302	NM_194292_at	43301	8.67169	2.48859	0.286979	5.61231	0	0
1419	27087	NM_003017_at	27086	8.67142	1.62914	0.187875	3.09328	0	0
1420	23930	NM_001033085_at	23929	8.66375	2.08607	0.240781	4.24589	0	0
1421	17232	4122582_at	17231	8.66068	2.13953	0.24704	4.4062	0	0
1422	40653	NM_152352_at	40652	8.66056	1.94174	0.224205	3.84169	0	0
1423	32278	NM_014791_at	32277	8.65957	3.18111	0.367352	9.07004	0	0
1424	33968	NM_017811_at	33967	8.65639	1.89563	0.218987	3.72086	0	0
1425	43929	NM_199357_at	43928	8.64921	3.00137	0.347011	8.0076	0	0
1426	47411	XM_001131341_at	47410	8.64315	3.1593	0.365526	8.93393	0	0
1427	31059	NM_007358_at	31058	8.63937	1.6053	0.185812	3.04258	0	0
1428	23031	NM_001012411_at	23030	8.63558	2.93296	0.339637	7.63676	0	0
1429	30687	NM_006916_at	30686	8.6354	1.66096	0.192343	3.16227	0	0
1430	30918	NM_007192_at	30917	8.63515	1.76955	0.204924	3.40947	0	0
1431	38068	NM_032796_at	38067	8.6347	1.77106	0.205109	3.41304	0	0
1432	45675	XM_001126823_at	45674	8.63349	1.87645	0.217345	3.6717	0	0
1433	36410	NM_024054_at	36409	8.63286	1.83113	0.212112	3.55817	0	0
1434	35556	NM_021063_at	35555	8.6317	1.93688	0.224391	3.82877	0	0
1435	33418	NM_016389_at	33417	8.6232	1.89412	0.219654	3.71695	0	0
1436	13915	4109965_at	13914	8.62255	2.1547	0.249891	4.45276	0	0
1437	45166	NR_003238_at	45165	8.62144	2.06947	0.240037	4.19732	0	0
1438	36776	NM_024775_at	36775	8.62058	1.91791	0.22248	3.77875	0	0
1439	27081	NM_003011_at	27080	8.61903	1.68603	0.195617	3.2177	0	0
1440	28075	NM_004094_at	28074	8.61769	1.66493	0.193199	3.17097	0	0
1441	4310	4072725_at	4309	8.61705	2.39905	0.278407	5.27456	0	0
1442	44235	NM_203463_at	44234	8.61537	2.0177	0.234197	4.04937	0	0
1443	33484	NM_016488_at	33483	8.61415	1.98022	0.22988	3.94553	0	0
1444	30632	NM_006859_at	30631	8.61396	1.84925	0.21468	3.60312	0	0
1445	23151	NM_001013415_at	23150	8.60737	1.76076	0.204564	3.38876	0	0
1446	34272	NM_018164_at	34271	8.60668	2.01157	0.233722	4.03221	0	0
1447	26877	NM_002799_at	26876	8.60064	2.16312	0.251507	4.47882	0	0
1448	34394	NM_018301_at	34393	8.59992	1.65411	0.192341	3.1473	0	0
1449	38039	NM_032747_at	38038	8.59849	2.04627	0.23798	4.13037	0	0
1450	29723	NM_005872_at	29722	8.59504	1.64866	0.191815	3.13542	0	0
1451	33878	NM_017704_at	33877	8.59385	1.65287	0.192332	3.14459	0	0
1452	38888	NM_078468_at	38887	8.59279	1.97704	0.230081	3.93684	0	0
1453	37578	NM_032043_at	37577	8.58918	2.77235	0.322772	6.83219	0	0
1454	43740	NM_198896_at	43739	8.58753	1.77524	0.206723	3.42296	0	0
1455	25139	NM_001080491_at	25138	8.58615	1.95801	0.228043	3.88526	0	0
1456	51828	XM_943800_at	51827	8.58615	1.95801	0.228043	3.88526	0	0
1457	40827	NM_152556_at	40826	8.58553	1.92887	0.224665	3.80757	0	0
1458	28476	NM_004523_at	28475	8.58287	3.12544	0.364149	8.72672	0	0
1459	38889	NM_078469_at	38888	8.58187	1.81845	0.211895	3.52703	0	0
1460	2396	4065339_at	2395	8.57366	1.67162	0.194971	3.18571	0	0
1461	36935	NM_025009_at	36934	8.57309	1.9161	0.223502	3.77402	0	0
1462	29721	NM_005870_at	29720	8.57103	1.97624	0.230572	3.93467	0	0
1463	22773	NM_001008727_at	22772	8.57045	1.92931	0.225112	3.80874	0	0
1464	31460	NM_013254_at	31459	8.56831	1.64211	0.19165	3.12123	0	0
1465	26097	NM_001967_at	26096	8.56806	2.03548	0.237566	4.0996	0	0
1466	26119	NM_001990_at	26118	8.56447	1.78035	0.207876	3.43509	0	0
1467	42912	NM_182503_at	42911	8.56214	1.586	0.185234	3.00215	0	0
1468	43240	NM_183375_at	43239	8.56183	1.65123	0.19286	3.14102	0	0
1469	45118	NR_003086_at	45117	8.55688	2.02267	0.236379	4.06335	0	0
1470	45652	XM_001126767_at	45651	8.55637	1.86283	0.217713	3.63721	0	0
1471	35009	NM_020164_at	35008	8.55245	2.46471	0.288188	5.52016	0	0
1472	43013	NM_182649_at	43012	8.55185	2.31298	0.270466	4.9691	0	0
1473	34996	NM_020151_at	34995	8.55081	1.59935	0.187041	3.03007	0	0
1474	36581	NM_024546_at	36580	8.54836	1.99323	0.233171	3.98127	0	0
1475	26667	NM_002576_at	26666	8.54787	1.74932	0.20465	3.362	0	0
1476	45355	XM_001125998_at	45354	8.54201	1.6454	0.192624	3.12834	0	0
1477	32160	NM_014660_at	32159	8.54201	1.79906	0.210613	3.47993	0	0
1478	46370	XM_001128670_at	46369	8.53831	1.77026	0.207331	3.41115	0	0
1479	37565	NM_032025_at	37564	8.53208	1.83199	0.214718	3.56029	0	0
1480	37545	NM_031966_at	37544	8.53082	2.69336	0.315721	6.46816	0	0
1481	44126	NM_203290_at	44125	8.53022	1.6928	0.198448	3.23284	0	0
1482	46431	XM_001128828_at	46430	8.52972	1.81585	0.212885	3.52068	0	0
1483	46470	XM_001128919_at	46469	8.52972	1.81585	0.212885	3.52068	0	0
1484	30297	NM_006496_at	30296	8.52727	1.89685	0.222445	3.72398	0	0
1485	48269	XM_001133446_at	48268	8.52598	1.67777	0.196783	3.19933	0	0
1486	48271	XM_001133453_at	48270	8.52598	1.67777	0.196783	3.19933	0	0
1487	37870	NM_032467_at	37869	8.52437	2.55927	0.30023	5.8941	0	0
1488	35029	NM_020188_at	35028	8.52294	2.26977	0.266313	4.82245	0	0
1489	25292	NM_001082970_at	25291	8.51981	1.75201	0.20564	3.36829	0	0
1490	34300	NM_018195_at	34299	8.51981	1.75201	0.20564	3.36829	0	0
1491	24629	NM_001042550_at	24628	8.51175	2.86194	0.336234	7.26992	0	0
1492	30245	NM_006441_at	30244	8.51152	1.60366	0.18841	3.03912	0	0
1493	43025	NM_182679_at	43024	8.51148	1.99873	0.234828	3.99649	0	0
1494	34762	NM_018981_at	34761	8.50547	2.16026	0.253984	4.46995	0	0
1495	52554	XR_015600_at	52553	8.49745	1.7013	0.200213	3.25194	0	0
1496	34798	NM_019026_at	34797	8.49596	1.91216	0.225067	3.76373	0	0
1497	37756	NM_032321_at	37755	8.49196	1.86093	0.21914	3.63242	0	0
1498	33547	NM_016567_at	33546	8.49028	1.79851	0.211832	3.47861	0	0
1499	29742	NM_005896_at	29741	8.4876	2.5205	0.296962	5.7378	0	0
1500	40942	NM_152713_at	40941	8.48483	1.85735	0.218903	3.62342	0	0
1501	30955	NM_007235_at	30954	8.48431	2.22915	0.262738	4.68857	0	0
1502	38535	NM_033505_at	38534	8.48186	2.31323	0.272727	4.96996	0	0
1503	40693	NM_152398_at	40692	8.48155	2.40392	0.283429	5.29238	0	0
1504	31707	NM_014053_at	31706	8.47304	1.99213	0.235114	3.97823	0	0
1505	25447	NM_001240_at	25446	8.47216	1.84279	0.217511	3.58702	0	0
1506	20876	NM_000100_at	20875	8.4711	1.96632	0.232121	3.9077	0	0
1507	21964	NM_001002296_at	21963	8.47012	1.67762	0.198064	3.199	0	0
1508	39820	NM_139168_at	39819	8.46803	1.64631	0.194415	3.13033	0	0
1509	27302	NM_003262_at	27301	8.46628	2.04535	0.241587	4.12773	0	0
1510	26495	NM_002396_at	26494	8.45823	2.16079	0.255466	4.4716	0	0
1511	27136	NM_003071_at	27135	8.45435	2.40021	0.283902	5.27879	0	0
1512	12461	4104472_at	12460	8.452	1.70806	0.20209	3.26722	0	0
1513	34816	NM_019049_at	34815	8.45171	2.01718	0.238671	4.04792	0	0
1514	39777	NM_139048_at	39776	8.44883	2.41047	0.285302	5.31647	0	0
1515	38221	NM_032999_at	38220	8.4404	1.76521	0.209138	3.39924	0	0
1516	28261	NM_004294_at	28260	8.4399	2.12849	0.252194	4.37261	0	0
1517	35240	NM_020548_at	35239	8.43516	1.89424	0.224565	3.71726	0	0
1518	44023	NM_201439_at	44022	8.43512	2.13321	0.252896	4.38692	0	0
1519	53786	XR_016951_at	53785	8.43482	1.6871	0.200016	3.22008	0	0
1520	55973	XR_019294_at	55972	8.43482	1.6871	0.200016	3.22008	0	0
1521	33394	NM_016355_at	33393	8.43396	1.71583	0.203443	3.28486	0	0
1522	30407	NM_006618_at	30406	8.43317	1.91866	0.227513	3.78071	0	0
1523	49719	XM_928359_at	49718	8.43051	1.96425	0.232993	3.9021	0	0
1524	31709	NM_014056_at	31708	8.4305	1.73283	0.205543	3.32379	0	0
1525	43976	NM_201224_at	43975	8.42804	1.72101	0.204201	3.29668	0	0
1526	42884	NM_182314_at	42883	8.42745	1.66195	0.197207	3.16444	0	0
1527	43338	NM_194451_at	43337	8.42655	1.7709	0.210157	3.41266	0	0
1528	28333	NM_004374_at	28332	8.42632	2.50596	0.297397	5.68028	0	0
1529	4217	4072369_at	4216	8.42576	1.63104	0.193577	3.09735	0	0
1530	27523	NM_003503_at	27522	8.42436	2.52486	0.299709	5.75517	0	0
1531	36867	NM_024894_at	36866	8.4233	1.68095	0.199559	3.20638	0	0
1532	8974	4091157_at	8973	8.41611	2.46851	0.293308	5.53474	0	0
1533	24611	NM_001042521_at	24610	8.41476	1.6173	0.192198	3.06801	0	0
1534	36319	NM_023073_at	36318	8.41045	2.03695	0.242193	4.10378	0	0
1535	33371	NM_016326_at	33370	8.40405	1.72967	0.205814	3.31652	0	0
1536	31725	NM_014078_at	31724	8.39615	2.54281	0.302855	5.82724	0	0
1537	45437	XM_001126203_at	45436	8.39207	2.25233	0.268388	4.76452	0	0
1538	49355	XM_496974_at	49354	8.38634	1.9156	0.228419	3.77271	0	0
1539	51285	XM_940754_at	51284	8.38634	1.9156	0.228419	3.77271	0	0
1540	21289	NM_000534_at	21288	8.38454	1.71299	0.204304	3.2784	0	0
1541	16973	4121591_at	16972	8.37817	2.28085	0.272238	4.85965	0	0
1542	28827	NM_004897_at	28826	8.37633	1.7893	0.213614	3.45647	0	0
1543	10494	4096853_at	10493	8.37001	1.72721	0.206357	3.31088	0	0
1544	54753	XR_018036_at	54752	8.36461	1.80314	0.215568	3.4898	0	0
1545	55532	XR_018838_at	55531	8.36461	1.80314	0.215568	3.4898	0	0
1546	11327	4100039_at	11326	8.36326	3.19215	0.381687	9.13974	0	0
1547	44031	NM_201515_at	44030	8.36097	2.10084	0.251268	4.28959	0	0
1548	29761	NM_005915_at	29760	8.36029	2.04011	0.244024	4.11276	0	0
1549	32390	NM_014923_at	32389	8.36025	2.02654	0.242402	4.07427	0	0
1550	41036	NM_152862_at	41035	8.35878	1.88717	0.225771	3.6991	0	0
1551	43192	NM_183043_at	43191	8.35683	1.98685	0.237751	3.96369	0	0
1552	28886	NM_004964_at	28885	8.3557	1.77246	0.212126	3.41635	0	0
1553	54594	XR_017823_at	54593	8.3557	2.66206	0.318592	6.32938	0	0
1554	52833	XR_015906_at	52832	8.35205	1.71174	0.204949	3.27556	0	0
1555	22715	NM_001008401_at	22714	8.35004	2.00217	0.23978	4.00603	0	0
1556	22813	NM_001009186_at	22812	8.34768	1.8525	0.221918	3.61126	0	0
1557	44980	NR_002807_at	44979	8.34436	2.2506	0.269715	4.7588	0	0
1558	33145	NM_016042_at	33144	8.34336	2.01452	0.241452	4.04046	0	0
1559	44856	NR_002434_at	44855	8.33753	2.07678	0.249088	4.21865	0	0
1560	40794	NM_152515_at	40793	8.33606	2.54062	0.304775	5.81841	0	0
1561	31324	NM_012345_at	31323	8.32969	1.75741	0.210981	3.38091	0	0
1562	40952	NM_152724_at	40951	8.32625	1.77057	0.212649	3.41188	0	0
1563	33085	NM_015969_at	33084	8.32291	1.8031	0.216643	3.4897	0	0
1564	31089	NM_012071_at	31088	8.3197	1.83002	0.219962	3.55542	0	0
1565	56247	XR_019614_at	56246	8.31695	2.24709	0.270182	4.74723	0	0
1566	31766	NM_014180_at	31765	8.31692	1.75029	0.21045	3.36427	0	0
1567	23263	NM_001014446_at	23262	8.31066	2.35787	0.283716	5.12612	0	0
1568	23790	NM_001031689_at	23789	8.31006	1.83513	0.220833	3.56805	0	0
1569	31522	NM_013330_at	31521	8.30932	2.0261	0.243835	4.07303	0	0
1570	44233	NM_203459_at	44232	8.29917	2.05986	0.248201	4.16947	0	0
1571	43368	NM_197972_at	43367	8.2983	2.02923	0.244535	4.08186	0	0
1572	37951	NM_032574_at	37950	8.29295	1.90853	0.230139	3.75427	0	0
1573	56128	XR_019471_at	56127	8.28855	1.65635	0.199836	3.15218	0	0
1574	10993	4098762_at	10992	8.28461	2.17987	0.263123	4.53112	0	0
1575	54410	XR_017613_at	54409	8.2827	1.59337	0.192373	3.01753	0	0
1576	516	4058208_at	515	8.27634	2.27228	0.274551	4.83085	0	0
1577	43548	NM_198435_at	43547	8.27212	2.94277	0.355745	7.68884	0	0
1578	43550	NM_198437_at	43549	8.27212	2.94277	0.355745	7.68884	0	0
1579	44711	NR_000024_at	44710	8.27143	2.5289	0.305739	5.77132	0	0
1580	32580	NM_015161_at	32579	8.26941	1.77072	0.21413	3.41225	0	0
1581	27696	NM_003688_at	27695	8.26233	2.05036	0.248158	4.14211	0	0
1582	36905	NM_024945_at	36904	8.26218	2.43603	0.294842	5.41152	0	0
1583	39912	NM_144508_at	39911	8.25754	2.70622	0.327728	6.52611	0	0
1584	36398	NM_024039_at	36397	8.2567	1.95753	0.237084	3.88396	0	0
1585	9903	4094684_at	9902	8.24468	2.45665	0.297968	5.48942	0	0
1586	35618	NM_021144_at	35617	8.24395	2.38867	0.289748	5.23674	0	0
1587	34559	NM_018492_at	34558	8.24291	3.25758	0.395198	9.56377	0	0
1588	34973	NM_020124_at	34972	8.23989	2.43457	0.295462	5.40605	0	0
1589	9070	4091501_at	9069	8.23982	1.69284	0.205446	3.23292	0	0
1590	28347	NM_004388_at	28346	8.23736	2.07248	0.251595	4.20608	0	0
1591	48485	XM_001134002_at	48484	8.23541	2.23157	0.270972	4.69644	0	0
1592	43478	NM_198267_at	43477	8.23412	1.93811	0.235376	3.83205	0	0
1593	34330	NM_018227_at	34329	8.23031	1.83341	0.222763	3.56378	0	0
1594	36688	NM_024670_at	36687	8.22662	2.13872	0.259975	4.4037	0	0
1595	45113	NR_003065_at	45112	8.22656	1.60668	0.195304	3.04549	0	0
1596	41412	NM_170589_at	41411	8.21932	2.69225	0.327551	6.46319	0	0
1597	34390	NM_018297_at	34389	8.21931	1.62232	0.197379	3.07869	0	0
1598	29615	NM_005751_at	29614	8.21876	2.02214	0.24604	4.06187	0	0
1599	40461	NM_147185_at	40460	8.21876	2.02214	0.24604	4.06187	0	0
1600	23661	NM_001025253_at	23660	8.21676	2.23867	0.272451	4.71961	0	0
1601	26584	NM_002491_at	26583	8.21483	2.0195	0.245836	4.05443	0	0
1602	6219	4080485_at	6218	8.21436	1.62596	0.197941	3.08647	0	0
1603	4289	4072633_at	4288	8.21324	2.00035	0.243552	4.00098	0	0
1604	42311	NM_177560_at	42310	8.21116	1.62462	0.197855	3.0836	0	0
1605	36911	NM_024953_at	36910	8.20947	1.83636	0.223688	3.57108	0	0
1606	44024	NM_201440_at	44023	8.20882	2.08143	0.25356	4.23226	0	0
1607	31358	NM_012399_at	31357	8.2075	1.81396	0.221013	3.51606	0	0
1608	49990	XM_931025_at	49989	8.20586	1.60609	0.195725	3.04426	0	0
1609	28587	NM_004637_at	28586	8.20457	1.74807	0.213061	3.35909	0	0
1610	8842	4090667_at	8841	8.20185	1.79493	0.218845	3.46999	0	0
1611	24889	NM_001077484_at	24888	8.20139	2.52953	0.308427	5.77385	0	0
1612	8160	4088009_at	8159	8.20094	2.24923	0.274265	4.75428	0	0
1613	44119	NM_203283_at	44118	8.19914	1.59005	0.193929	3.0106	0	0
1614	27348	NM_003315_at	27347	8.19374	1.77452	0.21657	3.42125	0	0
1615	9909	4094699_at	9908	8.1932	1.98929	0.242797	3.97041	0	0
1616	24597	NM_001042492_at	24596	8.19229	1.82389	0.222635	3.54035	0	0
1617	25902	NM_001762_at	25901	8.19065	1.81598	0.221714	3.52099	0	0
1618	28722	NM_004786_at	28721	8.18975	1.83667	0.224265	3.57185	0	0
1619	32286	NM_014802_at	32285	8.18969	1.6738	0.204379	3.19055	0	0
1620	7583	4085748_at	7582	8.18956	1.77667	0.216943	3.42634	0	0
1621	27021	NM_002948_at	27020	8.18937	1.75425	0.21421	3.37351	0	0
1622	32645	NM_015252_at	32644	8.18823	2.17602	0.265749	4.51904	0	0
1623	34311	NM_018206_at	34310	8.18708	1.82626	0.223066	3.54617	0	0
1624	44858	NR_002436_at	44857	8.18498	2.83843	0.346785	7.1524	0	0
1625	48805	XM_113962_at	48804	8.17696	1.75883	0.215096	3.38425	0	0
1626	50906	XM_938891_at	50905	8.17696	1.75883	0.215096	3.38425	0	0
1627	52225	XR_015197_at	52224	8.17689	2.0813	0.254535	4.23189	0	0
1628	52843	XR_015916_at	52842	8.17689	2.0813	0.254535	4.23189	0	0
1629	39876	NM_139313_at	39875	8.17587	1.69566	0.207398	3.23924	0	0
1630	40600	NM_152292_at	40599	8.17504	1.69783	0.207684	3.24412	0	0
1631	23033	NM_001012413_at	23032	8.17413	2.77619	0.339631	6.85041	0	0
1632	10663	4097508_at	10662	8.17345	1.70905	0.209098	3.26946	0	0
1633	27725	NM_003720_at	27724	8.16807	2.08407	0.255148	4.24001	0	0
1634	37526	NM_031942_at	37525	8.16043	2.15751	0.264386	4.46143	0	0
1635	42736	NM_181641_at	42735	8.15687	1.7579	0.215511	3.38204	0	0
1636	30481	NM_006699_at	30480	8.15444	1.68955	0.207194	3.22556	0	0
1637	30872	NM_007139_at	30871	8.15378	1.83018	0.224459	3.55583	0	0
1638	52662	XR_015720_at	52661	8.15159	1.97051	0.241733	3.91905	0	0
1639	42814	NM_181783_at	42813	8.14843	2.38472	0.292659	5.22241	0	0
1640	36375	NM_024011_at	36374	8.14618	1.58825	0.194969	3.00684	0	0
1641	30012	NM_006197_at	30011	8.14086	2.03903	0.250468	4.10968	0	0
1642	1124	4060427_at	1123	8.14082	1.63113	0.200364	3.09755	0	0
1643	46379	XM_001128698_at	46378	8.14	2.01947	0.248092	4.05435	0	0
1644	48620	XM_001134366_at	48619	8.14	2.01947	0.248092	4.05435	0	0
1645	14534	4112338_at	14533	8.13923	2.70891	0.332822	6.5383	0	0
1646	13499	4108357_at	13498	8.13828	2.85151	0.350383	7.21756	0	0
1647	27897	NM_003901_at	27896	8.13068	2.05434	0.252665	4.15353	0	0
1648	35978	NM_022121_at	35977	8.13009	2.84444	0.349866	7.18228	0	0
1649	18754	4128479_at	18753	8.12933	3.38227	0.416058	10.4271	0	0
1650	32287	NM_014803_at	32286	8.12657	1.94878	0.239804	3.86049	0	0
1651	27539	NM_003522_at	27538	8.12547	1.91824	0.236077	3.77961	0	0
1652	33657	NM_016937_at	33656	8.11852	1.80819	0.222724	3.50203	0	0
1653	34093	NM_017953_at	34092	8.11707	2.20805	0.272026	4.62051	0	0
1654	28638	NM_004698_at	28637	8.11655	1.86123	0.229313	3.63317	0	0
1655	21036	NM_000267_at	21035	8.10879	1.81368	0.223668	3.51538	0	0
1656	23300	NM_001014990_at	23299	8.10715	1.68319	0.207617	3.21136	0	0
1657	37281	NM_030954_at	37280	8.10712	1.67236	0.206282	3.18735	0	0
1658	27668	NM_003659_at	27667	8.10564	1.66929	0.205942	3.18058	0	0
1659	13085	4106805_at	13084	8.10265	1.92458	0.237525	3.79626	0	0
1660	39008	NM_080667_at	39007	8.10198	2.0641	0.254764	4.18172	0	0
1661	40452	NM_147171_at	40451	8.10181	1.98567	0.245089	3.96046	0	0
1662	30885	NM_007158_at	30884	8.09776	1.65	0.20376	3.13834	0	0.00391071
1663	23824	NM_001031733_at	23823	8.09759	1.63231	0.20158	3.10009	0	0.00411329
1664	2793	4066979_at	2792	8.09373	1.75355	0.216655	3.37187	0	0.00876187
1665	36696	NM_024680_at	36695	8.0911	2.03012	0.250908	4.0844	0	0.0119436
1666	29813	NM_005977_at	29812	8.09003	1.73309	0.214226	3.3244	0	0.0132326
1667	36169	NM_022731_at	36168	8.08857	1.58719	0.196226	3.00463	0	0.0149987
1668	46293	XM_001128468_at	46292	8.08374	1.72975	0.213978	3.3167	0	0.0208577
1669	37158	NM_030674_at	37157	8.0837	2.42138	0.299538	5.35681	0	0.0209126
1670	25467	NM_001260_at	25466	8.08278	2.2493	0.278283	4.75452	0	0.0220291
1671	30035	NM_006223_at	30034	8.08189	1.80595	0.223457	3.4966	0	0.0231006
1672	26632	NM_002539_at	26631	8.07861	2.94958	0.365111	7.72527	0	0.0270981
1673	22671	NM_001007553_at	22670	8.07776	1.64908	0.204151	3.13634	0	0.0281259
1674	33422	NM_016396_at	33421	8.07637	1.85528	0.229718	3.61823	0	0.0298242
1675	21426	NM_000692_at	21425	8.07614	2.02336	0.250535	4.06528	0	0.0301071
1676	32202	NM_014708_at	32201	8.07082	2.2072	0.273479	4.61779	0	0.0366006
1677	37793	NM_032359_at	37792	8.07029	1.59835	0.198054	3.02797	0	0.0372478
1678	34406	NM_018315_at	34405	8.06969	1.71096	0.212023	3.27379	0	0.0379794
1679	33217	NM_016126_at	33216	8.06074	2.22073	0.275499	4.66129	0	0.0489651
1680	29532	NM_005659_at	29531	8.05958	1.97824	0.245452	3.94012	0	0.05039
1681	8398	4088899_at	8397	8.0581	1.958	0.242985	3.88523	0	0.0522107
1682	27651	NM_003642_at	27650	8.05457	1.99186	0.247295	3.97748	0	0.0565684
1683	30424	NM_006636_at	30423	8.05217	2.59038	0.321699	6.02256	0	0.0595372
1684	42394	NM_178157_at	42393	8.0488	2.31278	0.287345	4.96841	0	0.0637118
1685	22718	NM_001008406_at	22717	8.04336	1.6455	0.204579	3.12857	0	0.0704507
1686	32955	NM_015693_at	32954	8.03976	1.72006	0.213944	3.2945	0	0.0749328
1687	27694	NM_003686_at	27693	8.0307	3.2831	0.408819	9.73446	0	0.0862502
1688	29860	NM_006027_at	29859	8.0307	3.2831	0.408819	9.73446	0	0.0862502
1689	25693	NM_001518_at	25692	8.02795	1.62313	0.202185	3.08044	0	0.0896862
1690	3084	4068086_at	3083	8.02667	1.84618	0.230005	3.59546	0	0.0913002
1691	1793	4062974_at	1792	8.02483	2.24509	0.279769	4.74068	0	0.0936125
1692	20609	4135514_at	20608	8.02402	2.27745	0.283829	4.84821	0	0.0946313
1693	44022	NM_201438_at	44021	8.02253	1.96961	0.245509	3.91661	0	0.0964959
1694	1377	4061375_at	1376	8.01731	1.74461	0.217606	3.35105	0	0.103074
1695	12805	4105741_at	12804	8.01386	3.13675	0.391416	8.79542	0	0.107432
1696	34470	NM_018387_at	34469	8.01216	2.1205	0.26466	4.34845	0	0.109581
1697	29933	NM_006107_at	29932	8.01052	1.65423	0.206507	3.14755	0	0.111656
1698	32744	NM_015384_at	32743	8.01023	1.6557	0.206698	3.15076	0	0.112022
1699	43547	NM_198434_at	43546	8.00979	2.84602	0.355318	7.19014	0	0.112587
1700	43549	NM_198436_at	43548	8.00979	2.84602	0.355318	7.19014	0	0.112587
1701	18036	4125706_at	18035	8.00876	2.17707	0.271836	4.52235	0	0.113891
1702	34221	NM_018109_at	34220	8.00592	1.88858	0.235898	3.70271	0	0.117492
1703	6337	4080913_at	6336	8.00428	1.83151	0.228816	3.5591	0	0.119576
1704	18540	4127725_at	18539	8.00093	1.65352	0.206666	3.146	0	0.123832
1705	26893	NM_002816_at	26892	7.99921	1.63384	0.204251	3.10339	0	0.126029
1706	48514	XM_001134073_at	48513	7.99921	1.63384	0.204251	3.10339	0	0.126029
1707	26735	NM_002645_at	26734	7.99906	1.71353	0.214217	3.27963	0	0.126211
1708	44901	NR_002605_at	44900	7.99716	1.90616	0.238355	3.74811	0	0.128638
1709	22564	NM_001006684_at	22563	7.99598	1.60291	0.200464	3.03755	0	0.130148
1710	26683	NM_002592_at	26682	7.995	2.12528	0.265827	4.36289	0	0.131405
1711	6972	4083338_at	6971	7.99349	2.17339	0.271895	4.51083	0	0.133334
1712	39315	NM_133433_at	39314	7.99145	1.65713	0.207363	3.15389	0	0.135938
1713	29490	NM_005614_at	29489	7.99126	1.63847	0.205033	3.11336	0	0.136179
1714	43052	NM_182719_at	43051	7.98751	2.19887	0.275288	4.59118	0	0.140996
1715	43109	NM_182835_at	43108	7.98591	1.82057	0.227973	3.53222	0	0.14304
1716	34787	NM_019012_at	34786	7.98407	2.04222	0.255787	4.11879	0	0.145415
1717	6622	4081950_at	6621	7.98193	3.41323	0.42762	10.6533	0	0.148159
1718	33202	NM_016106_at	33201	7.97823	1.8426	0.230954	3.58656	0	0.152927
1719	37809	NM_032380_at	37808	7.97279	1.63046	0.204503	3.09612	0	0.159961
1720	42829	NM_181802_at	42828	7.97271	1.74914	0.21939	3.36157	0	0.160057
1721	49438	XM_499356_at	49437	7.97234	2.89621	0.363282	7.44468	0	0.160543
1722	50339	XM_935540_at	50338	7.97234	2.89621	0.363282	7.44468	0	0.160543
1723	27675	NM_003666_at	27674	7.97067	1.83533	0.230261	3.56853	0	0.1627
1724	22533	NM_001006618_at	22532	7.96784	1.98556	0.249197	3.96017	0	0.166378
1725	52884	XR_015961_at	52883	7.96725	1.63755	0.205535	3.11138	0	0.167135
1726	52961	XR_016041_at	52960	7.96725	1.63755	0.205535	3.11138	0	0.167135
1727	30553	NM_006777_at	30552	7.965	1.68927	0.212087	3.22493	0	0.170059
1728	31768	NM_014182_at	31767	7.96488	1.77069	0.222312	3.41216	0	0.170215
1729	43193	NM_183044_at	43192	7.95488	1.88953	0.237531	3.70515	0	0.18325
1730	38296	NM_033109_at	38295	7.95227	2.10256	0.264397	4.2947	0	0.186665
1731	36421	NM_024068_at	36420	7.95075	1.7361	0.218357	3.33133	0	0.188655
1732	37163	NM_030755_at	37162	7.95067	1.79802	0.226147	3.47743	0	0.188762
1733	44869	NR_002559_at	44868	7.94537	1.86948	0.235292	3.65401	0	0.195724
1734	52154	XR_001449_at	52153	7.94355	2.13487	0.268756	4.39199	0	0.198117
1735	36712	NM_024699_at	36711	7.94208	2.15973	0.271935	4.46832	0	0.20005
1736	42393	NM_178156_at	42392	7.9394	2.01451	0.253736	4.04043	0	0.203575
1737	30092	NM_006281_at	30091	7.93627	1.65672	0.208753	3.15299	0	0.207705
1738	23317	NM_001015509_at	23316	7.9302	1.62174	0.204502	3.07746	0	0.215745
1739	36652	NM_024629_at	36651	7.92894	2.45686	0.30986	5.49022	0	0.217407
1740	4006	4071603_at	4005	7.92527	2.86279	0.361224	7.27423	0	0.222284
1741	26612	NM_002519_at	26611	7.92403	1.75516	0.221498	3.37563	0	0.223932
1742	17079	4122028_at	17078	7.91754	1.93969	0.244986	3.83622	0	0.232577
1743	9967	4094905_at	9966	7.91612	2.22417	0.280967	4.67241	0	0.234473
1744	22528	NM_001006613_at	22527	7.91606	2.22133	0.28061	4.66322	0	0.234553
1745	22529	NM_001006614_at	22528	7.91606	2.22133	0.28061	4.66322	0	0.234553
1746	32351	NM_014881_at	32350	7.91396	1.95647	0.247218	3.88113	0	0.237371
1747	26159	NM_002031_at	26158	7.90978	2.34658	0.296668	5.08617	0	0.242969
1748	32541	NM_015110_at	32540	7.90675	1.63225	0.206437	3.09995	0	0.247027
1749	28995	NM_005079_at	28994	7.90466	2.17618	0.275304	4.51956	0	0.24984
1750	27612	NM_003600_at	27611	7.89999	2.69859	0.341594	6.49167	0	0.256132
1751	40675	NM_152379_at	40674	7.89904	1.71919	0.217646	3.29252	0	0.257403
1752	25704	NM_001530_at	25703	7.89553	2.03961	0.258325	4.11135	0	0.262148
1753	35674	NM_021211_at	35673	7.89208	1.7742	0.224807	3.42047	0	0.266808
1754	26141	NM_002013_at	26140	7.892	1.86216	0.235956	3.63552	0	0.266924
1755	33360	NM_016312_at	33359	7.8907	1.86034	0.235764	3.63094	0	0.268679
1756	36194	NM_022761_at	36193	7.88807	1.96282	0.248834	3.89823	0	0.272254
1757	33062	NM_015942_at	33061	7.88797	1.92666	0.244253	3.80175	0	0.272379
1758	20834	NM_000057_at	20833	7.88704	2.04767	0.259624	4.13437	0	0.27364
1759	35075	NM_020244_at	35074	7.88496	2.11039	0.267647	4.31807	0	0.276467
1760	21949	NM_001002257_at	21948	7.88103	1.79802	0.228146	3.47743	0	0.281818
1761	35014	NM_020169_at	35013	7.87961	2.41797	0.306864	5.34419	0	0.28375
1762	28434	NM_004480_at	28433	7.87893	2.13197	0.270591	4.38315	0	0.284679
1763	32056	NM_014515_at	32055	7.87786	2.19264	0.278329	4.5714	0	0.28615
1764	54017	XR_017201_at	54016	7.8753	1.91254	0.242854	3.76472	0	0.289646
1765	55094	XR_018389_at	55093	7.8753	1.91254	0.242854	3.76472	0	0.289646
1766	40449	NM_147166_at	40448	7.87273	2.07179	0.26316	4.20407	0	0.293153
1767	30072	NM_006260_at	30071	7.87149	1.84279	0.234109	3.58703	0	0.294846
1768	28498	NM_004546_at	28497	7.86539	1.71985	0.21866	3.29402	0	0.303214
1769	43051	NM_182718_at	43050	7.86516	2.26011	0.287357	4.79028	0	0.303538
1770	31882	NM_014321_at	31881	7.86434	2.29356	0.291641	4.90265	0	0.304669
1771	33438	NM_016424_at	33437	7.85947	1.61274	0.205197	3.05832	0	0.311375
1772	8214	4088169_at	8213	7.85784	1.64599	0.209471	3.12962	0	0.313617
1773	27349	NM_003316_at	27348	7.85566	2.07393	0.264005	4.21033	0	0.316622
1774	41436	NM_170691_at	41435	7.85158	1.60239	0.204085	3.03645	0	0.322274
1775	45509	XM_001126402_at	45508	7.85068	1.98266	0.252546	3.9522	0	0.323518
1776	50371	XM_935751_at	50370	7.85068	1.98266	0.252546	3.9522	0	0.323518
1777	18796	4128628_at	18795	7.8496	1.66322	0.211886	3.16723	0	0.325014
1778	12961	4106331_at	12960	7.84893	1.71518	0.218524	3.28338	0	0.325949
1779	35840	NM_021927_at	35839	7.84848	1.88404	0.240052	3.69108	0	0.326563
1780	32709	NM_015341_at	32708	7.84622	1.83273	0.233582	3.56211	0	0.329703
1781	25508	NM_001304_at	25507	7.8361	1.75198	0.223578	3.36821	0	0.343796
1782	34298	NM_018193_at	34297	7.83406	2.15522	0.275109	4.45436	0	0.346647
1783	4246	4072499_at	4245	7.8332	2.06279	0.263339	4.17792	0	0.347853
1784	22756	NM_001008662_at	22755	7.83174	1.64626	0.210203	3.13021	0	0.349889
1785	21219	NM_000454_at	21218	7.83078	1.91484	0.244527	3.77071	0	0.35124
1786	33846	NM_017661_at	33845	7.83058	1.80915	0.231036	3.50435	0	0.351512
1787	32306	NM_014827_at	32305	7.8274	1.83776	0.234786	3.57455	0	0.35598
1788	5900	4079191_at	5899	7.82258	1.72839	0.220948	3.31357	0	0.362744
1789	38223	NM_033001_at	38222	7.82075	1.62129	0.207306	3.0765	0	0.36533
1790	44812	NR_002190_at	44811	7.81957	2.48665	0.318003	5.60474	0	0.36699
1791	32356	NM_014886_at	32355	7.81329	1.75144	0.224162	3.36694	0	0.375855
1792	42392	NM_178155_at	42391	7.8094	1.97298	0.252641	3.92577	0	0.381352
1793	19349	4130719_at	19348	7.80895	2.59855	0.332765	6.05676	0	0.381999
1794	35290	NM_020685_at	35289	7.80695	2.62829	0.33666	6.18291	0	0.384824
1795	30935	NM_007212_at	30934	7.80135	1.64963	0.211454	3.13752	0	0.392783
1796	35806	NM_021821_at	35805	7.8011	2.10195	0.269442	4.29289	0	0.393145
1797	54321	XR_017521_at	54320	7.80002	2.27985	0.292287	4.85626	0	0.394685
1798	55393	XR_018695_at	55392	7.80002	2.27985	0.292287	4.85626	0	0.394685
1799	5075	4075828_at	5074	7.79932	2.19957	0.282021	4.59343	0	0.395673
1800	21862	NM_001001894_at	21861	7.79904	2.0544	0.263418	4.15372	0	0.396082
1801	31010	NM_007297_at	31009	7.79575	1.59842	0.205038	3.02813	0	0.40077
1802	35683	NM_021222_at	35682	7.78897	1.72647	0.221655	3.30916	0	0.410469
1803	38836	NM_057175_at	38835	7.78844	1.60144	0.205618	3.03446	0	0.411233
1804	33667	NM_016951_at	33666	7.78736	1.68583	0.216482	3.21725	0	0.41277
1805	25221	NM_001080853_at	25220	7.78398	1.67684	0.215422	3.19727	0	0.41763
1806	36878	NM_024908_at	36877	7.78319	2.41169	0.309859	5.32097	0	0.418767
1807	42341	NM_177989_at	42340	7.78264	2.23034	0.286579	4.69246	0	0.419549
1808	19886	4132722_at	19885	7.78041	2.18981	0.281451	4.56244	0	0.422757
1809	29994	NM_006178_at	29993	7.77612	1.6461	0.211686	3.12986	0	0.42894
1810	43743	NM_198901_at	43742	7.77391	2.35924	0.303482	5.13101	0	0.432138
1811	33570	NM_016592_at	33569	7.77144	1.62118	0.208608	3.07627	0	0.435702
1812	30851	NM_007111_at	30850	7.77136	1.9929	0.256441	3.98036	0	0.435814
1813	23194	NM_001013663_at	23193	7.76876	1.75429	0.225813	3.3736	0	0.439588
1814	29974	NM_006156_at	29973	7.76784	1.65856	0.213516	3.15701	0	0.440921
1815	20634	4135634_at	20633	7.7664	1.6798	0.216291	3.20384	0	0.442997
1816	21980	NM_001002843_at	21979	7.76614	1.79489	0.231117	3.46988	0	0.443381
1817	32615	NM_015208_at	32614	7.76554	1.82296	0.23475	3.53806	0	0.444245
1818	35634	NM_021163_at	35633	7.76392	1.62888	0.209801	3.09272	0	0.446596
1819	33197	NM_016100_at	33196	7.76366	1.8533	0.238715	3.61326	0	0.446985
1820	42735	NM_181640_at	42734	7.7632	1.60639	0.206924	3.04489	0	0.447651
1821	29911	NM_006083_at	29910	7.76279	1.60844	0.207199	3.04922	0	0.448247
1822	14519	4112279_at	14518	7.75823	1.70463	0.219719	3.25946	0	0.454877
1823	37707	NM_032263_at	37706	7.74793	2.01255	0.259754	4.03496	0	0.46992
1824	41504	NM_172003_at	41503	7.73708	2.42682	0.31366	5.37705	0	0.485861
1825	35914	NM_022045_at	35913	7.73544	2.25485	0.291496	4.77285	0	0.488279
1826	39155	NM_130398_at	39154	7.72749	3.12486	0.404382	8.72319	0	0.500026
1827	44830	NR_002219_at	44829	7.71823	2.71389	0.351621	6.56089	0	0.513778
1828	26082	NM_001951_at	26081	7.70693	2.24049	0.290711	4.72558	0	0.530641
1829	29451	NM_005573_at	29450	7.70084	1.65821	0.215328	3.15625	0	0.539769
1830	12904	4106125_at	12903	7.69933	2.00214	0.26004	4.00593	0	0.542042
1831	15964	4117726_at	15963	7.69847	1.73332	0.225151	3.32491	0	0.543336
1832	26714	NM_002623_at	26713	7.69575	1.61942	0.21043	3.07251	0	0.547421
1833	53452	XR_016594_at	53451	7.69573	2.12944	0.276703	4.37546	0	0.54745
1834	23154	NM_001013437_at	23153	7.69398	1.66235	0.216059	3.16533	0	0.550099
1835	42391	NM_178154_at	42390	7.68852	1.96058	0.255001	3.89219	0	0.558339
1836	42680	NM_181503_at	42679	7.68729	1.59824	0.207907	3.02773	0	0.560191
1837	43310	NM_194314_at	43309	7.67482	2.05052	0.267175	4.14256	0	0.579114
1838	31853	NM_014288_at	31852	7.67288	2.35158	0.30648	5.10383	0	0.58208
1839	29714	NM_005863_at	29713	7.67175	2.57244	0.335313	5.94813	0	0.583801
1840	37030	NM_025191_at	37029	7.66972	1.61408	0.210448	3.06116	0	0.586897
1841	54634	XR_017877_at	54633	7.66964	2.37019	0.309036	5.17011	0	0.587013
1842	54708	XR_017977_at	54707	7.66964	2.37019	0.309036	5.17011	0	0.587013
1843	42594	NM_181054_at	42593	7.6696	1.97299	0.257248	3.9258	0	0.587084
1844	36992	NM_025133_at	36991	7.66855	1.58741	0.207003	3.0051	0	0.588682
1845	47765	XM_001132134_at	47764	7.66756	2.18789	0.285343	4.55637	0	0.590198
1846	42687	NM_181514_at	42686	7.66664	2.31681	0.302194	4.98231	0	0.591607
1847	42688	NM_181515_at	42687	7.66664	2.31681	0.302194	4.98231	0	0.591607
1848	31849	NM_014283_at	31848	7.6585	1.67432	0.218623	3.1917	0	0.60407
1849	45005	NR_002909_at	45004	7.65488	1.90715	0.249142	3.75069	0	0.609636
1850	37320	NM_031217_at	37319	7.65384	2.83834	0.370839	7.15199	0	0.611244
1851	3838	4070965_at	3837	7.64588	1.71108	0.223791	3.27406	0	0.623511
1852	43050	NM_182717_at	43049	7.64277	2.18312	0.285645	4.54134	0	0.628334
1853	36038	NM_022344_at	36037	7.64188	1.6983	0.222235	3.24518	0	0.629702
1854	39005	NM_080663_at	39004	7.63803	1.93037	0.252731	3.81152	0	0.635681
1855	37638	NM_032141_at	37637	7.63324	1.69598	0.222184	3.23997	0	0.643129
1856	35038	NM_020197_at	35037	7.62777	1.66579	0.218385	3.17287	0	0.651654
1857	30432	NM_006644_at	30431	7.62595	2.14213	0.2809	4.41412	0	0.654486
1858	29895	NM_006064_at	29894	7.62509	1.70095	0.223073	3.25115	0	0.655832
1859	10909	4098454_at	10908	7.61204	2.15654	0.283306	4.45844	0	0.676288
1860	13758	4109386_at	13757	7.60755	2.43001	0.31942	5.38896	0	0.683361
1861	15831	4117235_at	15830	7.60521	2.69017	0.353727	6.45388	0	0.687054
1862	43546	NM_198433_at	43545	7.60308	2.58944	0.340578	6.01865	0	0.690422
1863	34339	NM_018238_at	34338	7.59413	1.61878	0.213161	3.07114	0	0.704605
1864	27375	NM_003342_at	27374	7.58786	1.66045	0.21883	3.16115	0	0.714575
1865	36001	NM_022145_at	36000	7.58479	2.45793	0.324061	5.49428	0	0.719465
1866	36022	NM_022168_at	36021	7.5826	2.47157	0.325953	5.54649	0	0.722958
1867	49616	XM_927409_at	49615	7.57926	1.6611	0.219164	3.16258	0	0.728299
1868	50865	XM_938665_at	50864	7.57926	1.6611	0.219164	3.16258	0	0.728299
1869	44857	NR_002435_at	44856	7.57863	1.68642	0.222523	3.21857	0	0.729318
1870	27159	NM_003095_at	27158	7.57692	1.78018	0.234948	3.4347	0	0.732048
1871	41857	NM_173605_at	41856	7.57649	2.19083	0.289162	4.56568	0	0.732733
1872	43968	NM_199464_at	43967	7.57649	2.19083	0.289162	4.56568	0	0.732733
1873	34779	NM_019002_at	34778	7.57136	1.83366	0.242184	3.56441	0	0.74096
1874	28906	NM_004985_at	28905	7.56992	2.08284	0.275146	4.23639	0	0.743279
1875	24971	NM_001079537_at	24970	7.56858	1.67759	0.221651	3.19892	0	0.745434
1876	23660	NM_001025252_at	23659	7.56823	2.02331	0.267343	4.06516	0	0.745999
1877	37695	NM_032236_at	37694	7.567	1.67721	0.221648	3.1981	0	0.747982
1878	10104	4095379_at	10103	7.55794	1.90427	0.251956	3.7432	0	0.762596
1879	32271	NM_014783_at	32270	7.55525	2.57981	0.341459	5.97859	0	0.766961
1880	48434	XM_001133847_at	48433	7.55123	2.01317	0.266602	4.03669	0	0.773475
1881	48615	XM_001134352_at	48614	7.55123	2.01317	0.266602	4.03669	0	0.773475
1882	29819	NM_005983_at	29818	7.55043	2.09971	0.278092	4.28624	0	0.774769
1883	37894	NM_032499_at	37893	7.5473	1.85761	0.246129	3.62407	0	0.779858
1884	33266	NM_016195_at	33265	7.54036	2.54177	0.337088	5.82301	0	0.791157
1885	41764	NM_173487_at	41763	7.53379	2.01314	0.267214	4.03659	0	0.801898
1886	25992	NM_001859_at	25991	7.52413	2.6087	0.346711	6.09953	0	0.81775
1887	21038	NM_000269_at	21037	7.52368	1.7508	0.232706	3.36545	0	0.818505
1888	33158	NM_016058_at	33157	7.50622	1.79138	0.238653	3.46147	0	0.847357
1889	8155	4087991_at	8154	7.50511	1.79288	0.238888	3.46505	0	0.849201
1890	36413	NM_024057_at	36412	7.50128	2.09453	0.279223	4.27088	0	0.855574
1891	47397	XM_001131316_at	47396	7.4988	1.58691	0.211621	3.00405	0	0.859697
1892	9027	4091366_at	9026	7.49661	1.97401	0.26332	3.92859	0	0.863348
1893	40902	NM_152655_at	40901	7.49186	1.7336	0.231398	3.32557	0	0.87129
1894	37995	NM_032637_at	37994	7.48963	2.10311	0.280803	4.29635	0	0.875018
1895	43762	NM_198947_at	43761	7.48957	2.83009	0.37787	7.11117	0	0.875113
1896	44773	NR_001561_at	44772	7.48765	1.72489	0.230365	3.30555	0	0.878341
1897	12803	4105739_at	12802	7.48526	2.10727	0.281523	4.30876	0	0.882338
1898	26701	NM_002610_at	26700	7.47812	2.10558	0.281565	4.3037	0	0.894338
1899	17549	4123857_at	17548	7.47666	1.6495	0.22062	3.13725	0	0.8968
1900	15697	4116739_at	15696	7.47439	2.12841	0.28476	4.37235	0	0.900635
1901	36733	NM_024725_at	36732	7.46908	1.70939	0.228863	3.27023	0	0.909593
1902	47121	XM_001130629_at	47120	7.46351	1.62864	0.218214	3.09221	0	0.919029
1903	42949	NM_182551_at	42948	7.46231	1.63717	0.219392	3.11056	0	0.921059
1904	19196	4130111_at	19195	7.45434	1.98499	0.266287	3.95861	0	0.934615
1905	41506	NM_172005_at	41505	7.45194	1.75651	0.235711	3.37879	0	0.938709
1906	35740	NM_021627_at	35739	7.45184	1.83118	0.245736	3.55828	0	0.938877
1907	13170	4107136_at	13169	7.44925	1.70613	0.229034	3.26285	0	0.943302
1908	3873	4071124_at	3872	7.44319	1.83496	0.246529	3.56762	0	0.953659
1909	26789	NM_002710_at	26788	7.44217	1.77862	0.238992	3.43098	0	0.955412
1910	32141	NM_014635_at	32140	7.44117	1.68492	0.226432	3.21522	0	0.957124
1911	6167	4080288_at	6166	7.43676	1.68258	0.226251	3.21001	0	0.964702
1912	24978	NM_001079673_at	24977	7.43471	1.79093	0.240888	3.46038	0	0.968224
1913	53833	XR_017004_at	53832	7.43223	1.90403	0.256186	3.74257	0	0.972493
1914	54889	XR_018181_at	54888	7.43223	1.90403	0.256186	3.74257	0	0.972493
1915	43943	NM_199420_at	43942	7.43024	2.19648	0.295614	4.58361	0	0.975909
1916	24434	NM_001040409_at	24433	7.42734	2.42802	0.326902	5.38153	0	0.980918
1917	34251	NM_018141_at	34250	7.42114	1.64221	0.221288	3.12143	0	0.991645
1918	36475	NM_024295_at	36474	7.41782	1.66506	0.224468	3.17128	0	0.997394

## Sheet: NSCLC down
order	Row	Gene ID	Gene Name	Score(d)	Numerator(r)	Denominator(s+s0)	Fold Change	q-value(%)	localfdr(%)
1	48948	XM_293416_at	48947	-30.9808	-3.91399	0.126336	0.0663395	0	0
2	50746	XM_938042_at	50745	-30.9808	-3.91399	0.126336	0.0663395	0	0
3	16041	4117992_at	16040	-27.466	-5.26636	0.191741	0.0259816	0	0.00815117
4	15080	4114341_at	15079	-26.7331	-3.19231	0.119414	0.109401	0	0.0136968
5	19575	4131612_at	19574	-24.593	-4.555	0.185215	0.042541	0	0.0342725
6	8469	4089252_at	8468	-24.3718	-4.42315	0.181486	0.0466121	0	0.0366443
7	16155	4118387_at	16154	-24.3484	-4.87905	0.200385	0.0339828	0	0.0368951
8	7730	4086307_at	7729	-23.4807	-3.24137	0.138044	0.105743	0	0.0460204
9	1436	4061622_at	1435	-23.0642	-3.29913	0.143041	0.101593	0	0.0499899
10	18103	4125976_at	18102	-22.7246	-3.50539	0.154255	0.0880587	0	0.0528145
11	19611	4131719_at	19610	-22.4427	-5.25177	0.234008	0.0262457	0	0.0547778
12	8590	4089725_at	8589	-22.0375	-5.49754	0.249463	0.0221348	0	0.056816
13	17264	4122687_at	17263	-22.0354	-3.51127	0.159347	0.0877004	0	0.0568237
14	19519	4131370_at	19518	-21.691	-3.76288	0.173476	0.0736648	0	0.0575947
15	16003	4117873_at	16002	-21.454	-2.83438	0.132114	0.140206	0	0.0574894
16	10613	4097337_at	10612	-21.0079	-4.93659	0.234987	0.0326543	0	0.055595
17	3998	4071571_at	3997	-20.984	-2.60739	0.124256	0.164096	0	0.0554232
18	9439	4092978_at	9438	-20.8905	-3.30525	0.158218	0.101163	0	0.0546756
19	15662	4116568_at	15661	-20.8795	-3.44771	0.165124	0.0916508	0	0.0545798
20	13360	4107848_at	13359	-20.6736	-3.64765	0.17644	0.0797897	0	0.0524518
21	49059	XM_371923_at	49058	-20.5913	-2.79555	0.135763	0.144031	0	0.0514174
22	50341	XM_935555_at	50340	-20.5913	-2.79555	0.135763	0.144031	0	0.0514174
23	14777	4113270_at	14776	-20.5715	-6.38159	0.310215	0.0119936	0	0.051152
24	14317	4111537_at	14316	-20.0434	-2.70585	0.135	0.15327	0	0.0414873
25	12213	4103534_at	12212	-20.0286	-3.73202	0.186335	0.0752574	0	0.0411376
26	6051	4079791_at	6050	-19.9046	-2.79373	0.140356	0.144213	0	0.0380298
27	11384	4100260_at	11383	-19.8852	-2.64647	0.133087	0.159711	0	0.0375126
28	16255	4118779_at	16254	-19.7191	-4.96665	0.251871	0.0319808	0	0.0327418
29	30551	NM_006774_at	30550	-19.6371	-3.59783	0.183216	0.0825936	0	0.0301499
30	13081	4106788_at	13080	-19.4983	-3.18628	0.163413	0.109859	0	0.0253853
31	48	4056397_at	47	-19.4845	-4.60523	0.236353	0.0410855	0	0.0248864
32	7078	4083719_at	7077	-19.4688	-2.4917	0.127984	0.177797	0	0.0243134
33	7191	4084173_at	7190	-19.4675	-3.08751	0.158598	0.117644	0	0.0242647
34	31221	NM_012232_at	31220	-19.3983	-3.43681	0.177171	0.092346	0	0.0216527
35	6977	4083359_at	6976	-19.3557	-4.92633	0.254516	0.0328872	0	0.0199806
36	45078	NR_003003_at	45077	-19.2782	-4.6851	0.243026	0.0388727	0	0.0168176
37	6230	4080541_at	6229	-19.2056	-5.04634	0.262753	0.0302623	0	0.0137087
38	2839	4067144_at	2838	-19.2027	-5.32459	0.277283	0.024954	0	0.0135796
39	26349	NM_002231_at	26348	-19.1617	-2.82059	0.147199	0.141552	0	0.0117568
40	17380	4123198_at	17379	-19.1175	-4.60972	0.241126	0.0409576	0	0.00973215
41	19697	4132050_at	19696	-19.0638	-4.60543	0.24158	0.0410798	0	0.00720026
42	1523	4061914_at	1522	-18.9968	-5.35974	0.282139	0.0243534	0	0.00392541
43	15493	4115939_at	15492	-18.9858	-4.15057	0.218614	0.0563061	0	0.00337399
44	8476	4089290_at	8475	-18.9586	-2.66142	0.140381	0.158064	0	0.0019966
45	1529	4061951_at	1528	-18.9413	-2.68894	0.141961	0.155078	0	0.00111037
46	43528	NM_198392_at	43527	-18.8902	-4.2411	0.224513	0.0528813	0	0
47	18173	4126262_at	18172	-18.8877	-2.48714	0.13168	0.17836	0	0
48	14675	4112884_at	14674	-18.8637	-3.06676	0.162575	0.119347	0	0
49	19757	4132262_at	19756	-18.6963	-3.62908	0.194107	0.0808235	0	0
50	11597	4101077_at	11596	-18.6896	-4.1406	0.221545	0.0566963	0	0
51	10329	4096223_at	10328	-18.5844	-3.84513	0.206901	0.0695826	0	0
52	6620	4081935_at	6619	-18.4914	-3.78243	0.204551	0.0726731	0	0
53	21307	NM_000552_at	21306	-18.473	-3.70534	0.200582	0.0766621	0	0
54	13761	4109391_at	13760	-18.4688	-2.31493	0.125343	0.200973	0	0
55	23062	NM_001012614_at	23061	-18.4405	-2.13179	0.115603	0.228175	0	0
56	15277	4115104_at	15276	-18.3611	-3.43829	0.187259	0.0922511	0	0
57	12322	4103977_at	12321	-18.3404	-4.86021	0.265	0.0344295	0	0
58	2899	4067383_at	2898	-18.277	-2.51972	0.137863	0.174377	0	0
59	750	4059073_at	749	-18.2163	-3.18449	0.174816	0.109995	0	0
60	781	4059179_at	780	-18.0722	-2.95499	0.16351	0.128961	0	0
61	10315	4096179_at	10314	-18.0498	-4.72326	0.26168	0.037858	0	0
62	4452	4073332_at	4451	-18.0196	-2.20847	0.122559	0.216364	0	0
63	18759	4128505_at	18758	-18.0122	-2.33024	0.12937	0.198851	0	0
64	16067	4118090_at	16066	-18.0072	-2.41535	0.134132	0.18746	0	0
65	14357	4111663_at	14356	-17.9899	-2.92378	0.162523	0.131782	0	0
66	14356	4111658_at	14355	-17.9728	-2.66808	0.148451	0.157336	0	0
67	2163	4064422_at	2162	-17.9555	-4.16153	0.231769	0.0558797	0	0
68	8052	4087586_at	8051	-17.9546	-3.07182	0.171087	0.11893	0	0
69	16372	4119215_at	16371	-17.9275	-3.62313	0.202099	0.0811577	0	0
70	5723	4078465_at	5722	-17.9236	-2.56847	0.143301	0.168583	0	0
71	5902	4079211_at	5901	-17.8451	-2.80333	0.157092	0.143256	0	0
72	19088	4129681_at	19087	-17.8088	-2.3615	0.132604	0.194588	0	0
73	26212	NM_002087_at	26211	-17.7752	-3.2866	0.184897	0.102479	0	0
74	13228	4107352_at	13227	-17.7728	-3.10883	0.174921	0.115918	0	0
75	13962	4110181_at	13961	-17.7231	-5.55014	0.313159	0.0213423	0	0
76	2572	4066064_at	2571	-17.7074	-2.30328	0.130074	0.202602	0	0
77	23141	NM_001013257_at	23140	-17.6944	-1.98442	0.112149	0.252715	0	0
78	24625	NM_001042545_at	24624	-17.6745	-2.79467	0.158118	0.144119	0	0
79	19864	4132641_at	19863	-17.6487	-2.49247	0.141227	0.177702	0	0
80	6802	4082708_at	6801	-17.6095	-2.4146	0.137119	0.187556	0	0
81	39011	NM_080670_at	39010	-17.5998	-2.44761	0.139071	0.183314	0	0
82	11795	4101785_at	11794	-17.5459	-4.05649	0.231193	0.0601001	0	0
83	12960	4106330_at	12959	-17.5367	-3.21731	0.183461	0.107521	0	0
84	19231	4130266_at	19230	-17.5227	-4.14218	0.23639	0.0566344	0	0
85	19563	4131546_at	19562	-17.521	-4.07275	0.23245	0.0594265	0	0
86	44393	NM_207009_at	44392	-17.4549	-2.99966	0.171852	0.125029	0	0
87	47254	XM_001130983_at	47253	-17.4549	-2.99966	0.171852	0.125029	0	0
88	5330	4076816_at	5329	-17.4162	-5.26268	0.302172	0.026048	0	0
89	18032	4125694_at	18031	-17.4149	-2.53244	0.145418	0.172847	0	0
90	5062	4075794_at	5061	-17.4076	-2.32322	0.13346	0.199821	0	0
91	23582	NM_001024844_at	23581	-17.4058	-2.61225	0.15008	0.163544	0	0
92	19265	4130407_at	19264	-17.4012	-2.83456	0.162895	0.140188	0	0
93	986	4059919_at	985	-17.398	-3.20138	0.184009	0.108715	0	0
94	16712	4120531_at	16711	-17.3449	-2.5769	0.148568	0.167601	0	0
95	23653	NM_001025238_at	23652	-17.2733	-2.667	0.1544	0.157454	0	0
96	39832	NM_139181_at	39831	-17.2487	-2.35024	0.136256	0.196114	0	0
97	14184	4111047_at	14183	-17.2406	-3.53478	0.205026	0.0862828	0	0
98	10760	4097892_at	10759	-17.2096	-4.91049	0.285335	0.0332503	0	0
99	3195	4068465_at	3194	-17.1833	-3.0328	0.176497	0.12219	0	0
100	23649	NM_001025234_at	23648	-17.1247	-2.43679	0.142297	0.184694	0	0
101	24374	NM_001040118_at	24373	-17.0815	-2.33658	0.136791	0.197979	0	0
102	10869	4098301_at	10868	-17.0707	-4.57917	0.268247	0.0418343	0	0
103	19931	4132887_at	19930	-17.0542	-2.27572	0.13344	0.206509	0	0
104	30217	NM_006412_at	30216	-17.0009	-2.40384	0.141395	0.188961	0	0
105	27585	NM_003573_at	27584	-16.9893	-2.69622	0.158701	0.154297	0	0
106	9730	4093971_at	9729	-16.8711	-3.33655	0.197767	0.0989918	0	0
107	27259	NM_003206_at	27258	-16.8688	-3.79282	0.224843	0.0721519	0	0
108	25528	NM_001328_at	25527	-16.8485	-2.01537	0.119617	0.24735	0	0
109	32638	NM_015242_at	32637	-16.8429	-2.30208	0.136679	0.202771	0	0
110	23650	NM_001025235_at	23649	-16.813	-2.40619	0.143115	0.188653	0	0
111	23651	NM_001025236_at	23650	-16.813	-2.40619	0.143115	0.188653	0	0
112	19378	4130823_at	19377	-16.7843	-2.49887	0.148882	0.176915	0	0
113	30082	NM_006270_at	30081	-16.7581	-2.42083	0.144457	0.186749	0	0
114	17565	4123936_at	17564	-16.7563	-2.74293	0.163696	0.149381	0	0
115	396	4057736_at	395	-16.7511	-2.89866	0.173043	0.134096	0	0
116	24624	NM_001042544_at	24623	-16.7073	-2.6432	0.158206	0.160073	0	0
117	23652	NM_001025237_at	23651	-16.6713	-2.40407	0.144204	0.188931	0	0
118	21668	NM_000954_at	21667	-16.6538	-3.09927	0.1861	0.116688	0	0
119	19259	4130389_at	19258	-16.6358	-2.79787	0.168183	0.1438	0	0
120	11282	4099893_at	11281	-16.6144	-2.47065	0.148706	0.18041	0	0
121	27309	NM_003271_at	27308	-16.5757	-2.39322	0.144381	0.190357	0	0
122	7963	4087236_at	7962	-16.4848	-5.21945	0.316622	0.0268404	0	0
123	21541	NM_000820_at	21540	-16.4838	-2.587	0.156942	0.166431	0	0
124	10541	4097069_at	10540	-16.4702	-2.71447	0.164811	0.152357	0	0
125	10672	4097542_at	10671	-16.4476	-2.7951	0.16994	0.144076	0	0
126	48636	XM_001134400_at	48635	-16.3992	-3.11929	0.19021	0.11508	0	0
127	26409	NM_002292_at	26408	-16.3917	-2.16765	0.13224	0.222573	0	0
128	36247	NM_022833_at	36246	-16.388	-2.64487	0.16139	0.159888	0	0
129	24208	NM_001039490_at	24207	-16.3682	-2.96286	0.181013	0.12826	0	0
130	39769	NM_139030_at	39768	-16.3682	-2.96286	0.181013	0.12826	0	0
131	45259	XM_001125733_at	45258	-16.3483	-1.90396	0.116462	0.267209	0	0
132	30000	NM_006184_at	29999	-16.3431	-2.21922	0.135789	0.214757	0	0
133	9874	4094557_at	9873	-16.3256	-2.37255	0.145327	0.193104	0	0
134	39524	NM_138425_at	39523	-16.3188	-2.51514	0.154126	0.174931	0	0
135	18035	4125703_at	18034	-16.3137	-3.8023	0.233074	0.0716792	0	0
136	6902	4083076_at	6901	-16.3049	-3.03721	0.186276	0.121817	0	0
137	35562	NM_021070_at	35561	-16.2933	-2.08732	0.128109	0.235317	0	0
138	13586	4108731_at	13585	-16.2831	-3.32145	0.203982	0.100033	0	0
139	8985	4091201_at	8984	-16.2447	-2.98582	0.183803	0.126234	0	0
140	14279	4111401_at	14278	-16.2439	-3.56201	0.219283	0.0846698	0	0
141	18799	4128651_at	18798	-16.2367	-3.62563	0.223298	0.0810171	0	0
142	28662	NM_004723_at	28661	-16.235	-2.22265	0.136905	0.214248	0	0
143	18221	4126441_at	18220	-16.2186	-2.43256	0.149986	0.185237	0	0
144	8051	4087585_at	8050	-16.1854	-2.01996	0.124801	0.246565	0	0
145	8529	4089495_at	8528	-16.1834	-2.47413	0.152881	0.179975	0	0
146	15217	4114875_at	15216	-16.1728	-3.11671	0.192712	0.115286	0	0
147	5462	4077329_at	5461	-16.1603	-2.89299	0.179018	0.134625	0	0
148	19778	4132329_at	19777	-16.1536	-4.47134	0.276802	0.0450809	0	0
149	2996	4067727_at	2995	-16.1412	-3.87775	0.240239	0.0680272	0	0
150	18325	4126864_at	18324	-16.1211	-4.28072	0.265535	0.0514488	0	0
151	9387	4092780_at	9386	-16.1151	-2.70354	0.167764	0.153516	0	0
152	16806	4120953_at	16805	-16.0731	-3.04466	0.189425	0.12119	0	0
153	44290	NM_206538_at	44289	-16.0641	-1.70477	0.106123	0.30677	0	0
154	30100	NM_006289_at	30099	-16.0435	-2.14407	0.133641	0.226241	0	0
155	30659	NM_006887_at	30658	-16.0276	-2.24107	0.139826	0.211529	0	0
156	13785	4109479_at	13784	-16.0251	-2.35132	0.146727	0.195967	0	0
157	14403	4111859_at	14402	-16.0227	-3.78444	0.236193	0.0725721	0	0
158	4530	4073702_at	4529	-16.016	-2.64275	0.165007	0.160123	0	0
159	24305	NM_001039848_at	24304	-16.01	-2.46062	0.153692	0.181669	0	0
160	12889	4106067_at	12888	-15.9722	-2.55623	0.160042	0.170019	0	0
161	10902	4098429_at	10901	-15.9629	-3.53297	0.221324	0.0863914	0	0
162	6052	4079793_at	6051	-15.9558	-6.2245	0.390109	0.0133733	0	0
163	25515	NM_001312_at	25514	-15.9277	-2.7133	0.17035	0.152481	0	0
164	30822	NM_007074_at	30821	-15.9147	-2.28402	0.143516	0.205324	0	0
165	7917	4087047_at	7916	-15.902	-3.65658	0.229944	0.0792978	0	0
166	9648	4093704_at	9647	-15.8921	-3.79911	0.239057	0.0718378	0	0
167	27802	NM_003801_at	27801	-15.8879	-1.89511	0.11928	0.268854	0	0
168	47442	XM_001131400_at	47441	-15.8789	-2.15218	0.135537	0.224973	0	0
169	47864	XM_001132358_at	47863	-15.8789	-2.15218	0.135537	0.224973	0	0
170	30128	NM_006319_at	30127	-15.8429	-2.13208	0.134576	0.228128	0	0
171	42079	NM_175063_at	42078	-15.829	-1.65369	0.104472	0.317826	0	0
172	32736	NM_015374_at	32735	-15.815	-1.96438	0.12421	0.25625	0	0
173	20797	NM_000020_at	20796	-15.8063	-2.50215	0.1583	0.176514	0	0
174	13246	4107414_at	13245	-15.8059	-4.86192	0.307602	0.0343888	0	0
175	26903	NM_002826_at	26902	-15.804	-2.2769	0.144071	0.206341	0	0
176	28988	NM_005072_at	28987	-15.7865	-2.05244	0.130012	0.241075	0	0
177	15546	4116143_at	15545	-15.7513	-4.19212	0.266145	0.0547075	0	0
178	9675	4093804_at	9674	-15.7295	-2.81581	0.179014	0.142023	0	0
179	8701	4090137_at	8700	-15.7054	-2.4865	0.158321	0.178438	0	0
180	19343	4130698_at	19342	-15.6892	-2.14561	0.136757	0.225999	0	0
181	30858	NM_007121_at	30857	-15.687	-2.36694	0.150886	0.193857	0	0
182	45692	XM_001126859_at	45691	-15.6782	-3.37517	0.215278	0.0963768	0	0
183	47060	XM_001130439_at	47059	-15.6782	-3.37517	0.215278	0.0963768	0	0
184	20569	4135365_at	20568	-15.6719	-3.11404	0.198702	0.1155	0	0
185	26060	NM_001928_at	26059	-15.6242	-2.6825	0.171688	0.155772	0	0
186	21327	NM_000581_at	21326	-15.5853	-2.76949	0.177699	0.146656	0	0
187	730	4059009_at	729	-15.5699	-3.37831	0.216977	0.0961675	0	0
188	12312	4103925_at	12311	-15.5576	-2.5505	0.163939	0.170696	0	0
189	15803	4117157_at	15802	-15.5475	-2.83603	0.182411	0.140046	0	0
190	23089	NM_001012727_at	23088	-15.5395	-2.21589	0.142597	0.215254	0	0
191	26819	NM_002741_at	26818	-15.5337	-2.30556	0.148424	0.202282	0	0
192	15899	4117501_at	15898	-15.5242	-2.10128	0.135355	0.233052	0	0
193	38855	NM_058174_at	38854	-15.5152	-1.83289	0.118135	0.280701	0	0
194	38826	NM_057161_at	38825	-15.5081	-1.96183	0.126503	0.256703	0	0
195	16785	4120854_at	16784	-15.5068	-5.14878	0.332033	0.0281879	0	0
196	19718	4132110_at	19717	-15.4989	-2.90642	0.187524	0.133377	0	0
197	10643	4097453_at	10642	-15.4931	-2.52271	0.162827	0.174016	0	0
198	25756	NM_001611_at	25755	-15.4811	-3.34349	0.215973	0.0985168	0	0
199	24464	NM_001040456_at	24463	-15.4372	-2.12553	0.137688	0.229167	0	0
200	16251	4118755_at	16250	-15.4304	-4.8647	0.315267	0.0343226	0	0
201	20951	NM_000177_at	20950	-15.4301	-2.909	0.188528	0.133139	0	0
202	54066	XR_017252_at	54065	-15.4118	-2.60149	0.168799	0.164768	0	0
203	6915	4083134_at	6914	-15.4057	-2.48763	0.161475	0.178299	0	0
204	4796	4074754_at	4795	-15.3913	-4.57989	0.297564	0.0418133	0	0
205	17185	4122398_at	17184	-15.3727	-3.42022	0.222487	0.0934137	0	0
206	616	4058539_at	615	-15.3611	-2.01519	0.131188	0.247381	0	0
207	13438	4108141_at	13437	-15.3356	-3.5252	0.229871	0.0868581	0	0
208	30484	NM_006702_at	30483	-15.3238	-2.50698	0.163601	0.175923	0	0
209	6893	4083049_at	6892	-15.3023	-4.54358	0.296921	0.0428792	0	0
210	12136	4103212_at	12135	-15.2977	-2.81474	0.183997	0.142128	0	0
211	17306	4122874_at	17305	-15.2968	-2.46015	0.160828	0.181728	0	0
212	17552	4123869_at	17551	-15.2877	-3.03645	0.19862	0.121882	0	0
213	36415	NM_024060_at	36414	-15.2694	-2.08962	0.13685	0.234943	0	0
214	17847	4125045_at	17846	-15.2537	-5.05042	0.331095	0.0301768	0	0
215	19913	4132837_at	19912	-15.2337	-4.22951	0.277642	0.0533076	0	0
216	46319	XM_001128541_at	46318	-15.2333	-1.99247	0.130797	0.251308	0	0
217	46601	XM_001129248_at	46600	-15.2333	-1.99247	0.130797	0.251308	0	0
218	25353	NM_001136_at	25352	-15.2109	-3.79614	0.249566	0.0719861	0	0
219	37521	NM_031937_at	37520	-15.2061	-1.90414	0.125223	0.267175	0	0
220	28318	NM_004357_at	28317	-15.1856	-2.81046	0.185074	0.14255	0	0
221	39768	NM_139029_at	39767	-15.1856	-2.81046	0.185074	0.14255	0	0
222	35743	NM_021630_at	35742	-15.1787	-1.97587	0.130174	0.254216	0	0
223	14431	4111962_at	14430	-15.1772	-3.66526	0.241498	0.0788216	0	0
224	34149	NM_018031_at	34148	-15.1468	-2.14507	0.141619	0.226085	0	0
225	20094	4133444_at	20093	-15.1411	-2.24744	0.148433	0.210598	0	0
226	3164	4068345_at	3163	-15.1394	-2.07312	0.136935	0.237645	0	0
227	4780	4074681_at	4779	-15.1379	-5.56238	0.367447	0.021162	0	0
228	26449	NM_002346_at	26448	-15.1328	-2.42312	0.160124	0.186453	0	0
229	7020	4083487_at	7019	-15.1123	-2.73881	0.181231	0.149808	0	0
230	22516	NM_001005920_at	22515	-15.1096	-2.0156	0.133399	0.247311	0	0
231	13297	4107584_at	13296	-15.0878	-3.75968	0.249186	0.0738285	0	0
232	20210	4133939_at	20209	-15.0872	-4.24916	0.281641	0.0525866	0	0
233	32240	NM_014748_at	32239	-15.083	-1.75372	0.116271	0.296537	0	0
234	24304	NM_001039847_at	24303	-15.0741	-2.30684	0.153034	0.202103	0	0
235	26210	NM_002085_at	26209	-15.0741	-2.30684	0.153034	0.202103	0	0
236	14570	4112467_at	14569	-15.066	-3.49999	0.23231	0.0883892	0	0
237	6771	4082592_at	6770	-15.0656	-3.78571	0.251283	0.0725082	0	0
238	25836	NM_001694_at	25835	-15.0556	-2.32174	0.154211	0.200026	0	0
239	25641	NM_001456_at	25640	-15.0509	-2.90681	0.193132	0.133341	0	0
240	50416	XM_936241_at	50415	-15.0508	-2.55767	0.169935	0.16985	0	0
241	9415	4092889_at	9414	-15.0503	-2.52432	0.167725	0.173821	0	0
242	9020	4091347_at	9019	-15.0431	-2.95095	0.196166	0.129323	0	0
243	30136	NM_006328_at	30135	-15.0264	-2.16778	0.144264	0.222554	0	0
244	44634	NM_213560_at	44633	-15.0253	-2.26268	0.150592	0.208384	0	0
245	10172	4095647_at	10171	-15.0248	-2.61235	0.17387	0.163532	0	0
246	2898	4067375_at	2897	-15.0092	-4.17136	0.27792	0.0555005	0	0
247	3124	4068228_at	3123	-14.9911	-2.24254	0.149592	0.211314	0	0
248	11956	4102489_at	11955	-14.9851	-2.18631	0.145899	0.219713	0	0
249	18950	4129169_at	18949	-14.9733	-4.49752	0.300369	0.0442702	0	0
250	10416	4096555_at	10415	-14.9695	-2.42949	0.162296	0.185632	0	0
251	43470	NM_198252_at	43469	-14.9329	-2.9184	0.195434	0.132273	0	0
252	24861	NM_001077401_at	24860	-14.9102	-2.41935	0.162262	0.18694	0	0
253	5807	4078789_at	5806	-14.9098	-2.21716	0.148705	0.215064	0	0
254	25983	NM_001849_at	25982	-14.9054	-1.86269	0.124967	0.274964	0	0
255	1494	4061830_at	1493	-14.8993	-5.31038	0.356418	0.0252009	0	0
256	21220	NM_000455_at	21219	-14.8976	-1.86727	0.12534	0.274091	0	0
257	4502	4073571_at	4501	-14.8842	-2.5601	0.172001	0.169564	0	0
258	6050	4079790_at	6049	-14.8724	-2.13025	0.143235	0.228419	0	0
259	49539	XM_926698_at	49538	-14.8638	-3.37053	0.226761	0.0966876	0	0
260	582	4058426_at	581	-14.8634	-2.18506	0.14701	0.219903	0	0
261	10816	4098078_at	10815	-14.8318	-2.09783	0.141441	0.23361	0	0
262	46154	XM_001128065_at	46153	-14.8194	-1.68427	0.113653	0.31116	0	0
263	22424	NM_001005415_at	22423	-14.8145	-2.04067	0.137748	0.243051	0	0
264	24056	NM_001035534_at	24055	-14.8014	-2.64887	0.17896	0.159445	0	0
265	30181	NM_006373_at	30180	-14.7864	-2.00829	0.13582	0.248567	0	0
266	34863	NM_019105_at	34862	-14.7656	-2.25694	0.152851	0.209215	0	0
267	18473	4127485_at	18472	-14.7632	-2.74589	0.185996	0.149075	0	0
268	4996	4075509_at	4995	-14.7449	-2.67112	0.181155	0.157005	0	0
269	23909	NM_001033026_at	23908	-14.7406	-1.74394	0.118308	0.298553	0	0
270	2267	4064861_at	2266	-14.735	-2.78488	0.188997	0.1451	0	0
271	13852	4109747_at	13851	-14.718	-2.31016	0.156961	0.201638	0	0
272	4708	4074387_at	4707	-14.7145	-2.66461	0.181087	0.157715	0	0
273	12052	4102900_at	12051	-14.7093	-3.14487	0.213801	0.113058	0	0
274	15051	4114218_at	15050	-14.6887	-2.7269	0.185646	0.15105	0	0
275	18593	4127910_at	18592	-14.6796	-2.22585	0.151629	0.213773	0	0
276	6942	4083235_at	6941	-14.6748	-3.85262	0.262533	0.0692224	0	0
277	13364	4107863_at	13363	-14.6682	-2.14403	0.146168	0.226247	0	0
278	20877	NM_000101_at	20876	-14.6587	-1.98676	0.135534	0.252305	0	0
279	27738	NM_003734_at	27737	-14.6548	-3.79327	0.258841	0.0721292	0	0
280	23048	NM_001012478_at	23047	-14.6473	-1.82228	0.12441	0.282774	0	0
281	30995	NM_007279_at	30994	-14.6473	-1.82228	0.12441	0.282774	0	0
282	21163	NM_000398_at	21162	-14.6382	-2.02461	0.138311	0.245771	0	0
283	3639	4070214_at	3638	-14.635	-2.84614	0.194475	0.139068	0	0
284	25348	NM_001130_at	25347	-14.6224	-2.08111	0.142323	0.236333	0	0
285	43778	NM_198970_at	43777	-14.6224	-2.08111	0.142323	0.236333	0	0
286	2402	4065360_at	2401	-14.6217	-4.11157	0.281196	0.0578489	0	0
287	11580	4100983_at	11579	-14.6053	-3.89661	0.266794	0.0671434	0	0
288	40593	NM_152285_at	40592	-14.5703	-1.8229	0.125111	0.282652	0	0
289	52772	XR_015840_at	52771	-14.553	-2.18833	0.150369	0.219406	0	0
290	16455	4119526_at	16454	-14.518	-3.03227	0.208863	0.122235	0	0
291	3308	4068915_at	3307	-14.5107	-2.44203	0.168292	0.184025	0	0
292	23255	NM_001014436_at	23254	-14.4809	-1.89375	0.130776	0.269107	0	0
293	31715	NM_014063_at	31714	-14.4809	-1.89375	0.130776	0.269107	0	0
294	38856	NM_058175_at	38855	-14.4579	-1.74978	0.121026	0.297346	0	0
295	26139	NM_002011_at	26138	-14.4397	-2.07701	0.143841	0.237005	0	0
296	47498	XM_001131524_at	47497	-14.4393	-2.31501	0.160327	0.200961	0	0
297	48129	XM_001133062_at	48128	-14.4393	-2.31501	0.160327	0.200961	0	0
298	33491	NM_016496_at	33490	-14.4388	-1.92977	0.133652	0.26247	0	0
299	25634	NM_001449_at	25633	-14.4349	-3.91153	0.270977	0.0664528	0	0
300	15070	4114297_at	15069	-14.4344	-3.16042	0.21895	0.111846	0	0
301	22119	NM_001004128_at	22118	-14.4266	-2.17795	0.150968	0.220989	0	0
302	19018	4129402_at	19017	-14.4128	-5.11503	0.354895	0.0288551	0	0
303	46953	XM_001130180_at	46952	-14.4115	-1.79037	0.124232	0.289099	0	0
304	48016	XM_001132744_at	48015	-14.4115	-1.79037	0.124232	0.289099	0	0
305	5639	4078073_at	5638	-14.409	-2.96434	0.205729	0.128128	0	0
306	21743	NM_001001438_at	21742	-14.3966	-1.97443	0.137145	0.254471	0	0
307	24733	NM_001045_at	24732	-14.3919	-3.95813	0.275024	0.0643406	0	0
308	617	4058542_at	616	-14.3895	-2.72284	0.189224	0.151476	0	0
309	27790	NM_003789_at	27789	-14.3887	-1.77658	0.12347	0.291874	0	0
310	2545	4065950_at	2544	-14.3881	-2.60714	0.181201	0.164124	0	0
311	34894	NM_019601_at	34893	-14.382	-2.45469	0.170678	0.182417	0	0
312	3947	4071389_at	3946	-14.3785	-2.47217	0.171935	0.18022	0	0
313	17172	4122357_at	17171	-14.3675	-4.22491	0.29406	0.0534779	0	0
314	12715	4105401_at	12714	-14.3651	-4.62048	0.321647	0.0406535	0	0
315	3404	4069292_at	3403	-14.3647	-3.53517	0.246102	0.0862595	0	0
316	29457	NM_005581_at	29456	-14.3497	-1.75848	0.122544	0.29556	0	0
317	6778	4082633_at	6777	-14.3426	-4.04616	0.282108	0.0605317	0	0
318	42317	NM_177939_at	42316	-14.3392	-1.73422	0.120942	0.300572	0	0
319	43006	NM_182642_at	43005	-14.3242	-2.14544	0.149777	0.226026	0	0
320	886	4059592_at	885	-14.3137	-3.91199	0.273303	0.0664316	0	0
321	10286	4096061_at	10285	-14.3044	-2.2916	0.160202	0.204249	0	0
322	22425	NM_001005416_at	22424	-14.288	-2.03919	0.14272	0.243301	0	0
323	10243	4095916_at	10242	-14.2876	-2.08614	0.146011	0.235509	0	0
324	6704	4082341_at	6703	-14.2611	-2.24795	0.157628	0.210523	0	0
325	47065	XM_001130451_at	47064	-14.2438	-1.75923	0.123509	0.295405	0	0
326	10423	4096575_at	10422	-14.2229	-2.93463	0.206331	0.130794	0	0
327	2509	4065815_at	2508	-14.2191	-1.99684	0.140434	0.250548	0	0
328	38494	NM_033420_at	38493	-14.2177	-1.66764	0.117293	0.314769	0	0
329	18810	4128676_at	18809	-14.2172	-2.48148	0.174541	0.17906	0	0
330	14973	4113925_at	14972	-14.217	-3.37738	0.237558	0.0962295	0	0
331	18962	4129205_at	18961	-14.2134	-4.35216	0.3062	0.0489632	0	0
332	10706	4097673_at	10705	-14.201	-3.68332	0.259371	0.0778411	0	0
333	36442	NM_024092_at	36441	-14.1928	-2.73162	0.192464	0.150557	0	0
334	15094	4114400_at	15093	-14.1884	-2.25611	0.159011	0.209336	0	0
335	31033	NM_007326_at	31032	-14.1826	-1.97013	0.138912	0.25523	0	0
336	3530	4069747_at	3529	-14.174	-4.54295	0.320512	0.0428979	0	0
337	17234	4122584_at	17233	-14.1681	-1.93023	0.136238	0.262387	0	0
338	3872	4071119_at	3871	-14.1598	-1.63612	0.115547	0.32172	0	0
339	24465	NM_001040457_at	24464	-14.1593	-1.99085	0.140604	0.251591	0	0
340	14143	4110891_at	14142	-14.1578	-3.50576	0.24762	0.0880361	0	0
341	19223	4130230_at	19222	-14.1562	-3.24025	0.228893	0.105825	0	0
342	25269	NM_001081755_at	25268	-14.1554	-1.80592	0.127578	0.285999	0	0
343	37782	NM_032348_at	37781	-14.1475	-2.28126	0.161249	0.205718	0	0
344	2941	4067541_at	2940	-14.1404	-4.32181	0.305636	0.0500041	0	0
345	20875	NM_000099_at	20874	-14.1196	-2.19797	0.155668	0.217945	0	0
346	14821	4113434_at	14820	-14.1192	-3.75605	0.266025	0.0740145	0	0
347	26504	NM_002406_at	26503	-14.1107	-2.54426	0.180308	0.171436	0	0
348	11208	4099592_at	11207	-14.1105	-2.56242	0.181597	0.169291	0	0
349	10698	4097645_at	10697	-14.1094	-2.37964	0.168657	0.192157	0	0
350	14655	4112817_at	14654	-14.0918	-3.61787	0.256736	0.081454	0	0
351	22943	NM_001010972_at	22942	-14.0819	-2.46052	0.174729	0.181682	0	0
352	27485	NM_003461_at	27484	-14.0819	-2.46052	0.174729	0.181682	0	0
353	6129	4080098_at	6128	-14.0819	-2.87209	0.203956	0.136589	0	0
354	8212	4088162_at	8211	-14.0799	-2.344	0.166478	0.196963	0	0
355	31568	NM_013379_at	31567	-14.076	-1.84811	0.131296	0.277756	0	0
356	16432	4119450_at	16431	-14.0673	-3.61855	0.257232	0.0814155	0	0
357	25266	NM_001081752_at	25265	-14.0667	-1.82525	0.129757	0.282193	0	0
358	32114	NM_014604_at	32113	-14.0657	-2.48268	0.176505	0.178912	0	0
359	25267	NM_001081753_at	25266	-14.0639	-1.81259	0.128882	0.28468	0	0
360	33105	NM_015993_at	33104	-14.0547	-2.20459	0.156858	0.216947	0	0
361	16374	4119219_at	16373	-14.0494	-2.01327	0.143299	0.247711	0	0
362	46288	XM_001128458_at	46287	-14.0473	-3.28839	0.234093	0.102352	0	0
363	10468	4096756_at	10467	-14.0461	-2.3195	0.165136	0.200337	0	0
364	16922	4121369_at	16921	-14.0045	-2.32081	0.165719	0.200155	0	0
365	47164	XM_001130742_at	47163	-14.0041	-2.25249	0.160845	0.209862	0	0
366	601	4058482_at	600	-13.9895	-3.51154	0.251014	0.0876839	0	0
367	41582	NM_172209_at	41581	-13.9866	-2.10393	0.150425	0.232624	0	0
368	25268	NM_001081754_at	25267	-13.9809	-1.76265	0.126076	0.294706	0	0
369	1216	4060722_at	1215	-13.9804	-5.06416	0.362232	0.0298906	0	0
370	9368	4092718_at	9367	-13.958	-2.85347	0.204433	0.138363	0	0
371	21258	NM_000501_at	21257	-13.9514	-1.75758	0.125979	0.295745	0	0
372	16057	4118043_at	16056	-13.9431	-4.52185	0.324308	0.04353	0	0
373	29623	NM_005762_at	29622	-13.9417	-1.61557	0.115881	0.326336	0	0
374	38242	NM_033027_at	38241	-13.9396	-3.23422	0.232017	0.106268	0	0
375	6281	4080733_at	6280	-13.935	-3.97802	0.285471	0.0634593	0	0
376	14222	4111218_at	14221	-13.9321	-3.87777	0.278334	0.0680261	0	0
377	33326	NM_016270_at	33325	-13.9154	-1.97669	0.142051	0.254072	0	0
378	15724	4116862_at	15723	-13.9093	-2.79245	0.200761	0.144341	0	0
379	32258	NM_014767_at	32257	-13.9009	-2.28525	0.164396	0.205149	0	0
380	512	4058193_at	511	-13.8998	-4.45062	0.320193	0.0457331	0	0
381	10919	4098494_at	10918	-13.8944	-3.41794	0.245994	0.0935615	0	0
382	19983	4133059_at	19982	-13.8897	-2.92423	0.210532	0.13174	0	0
383	39587	NM_138570_at	39586	-13.8871	-1.73733	0.125104	0.299923	0	0
384	8926	4090992_at	8925	-13.874	-2.68095	0.193235	0.155939	0	0
385	12254	4103693_at	12253	-13.8732	-3.33722	0.240552	0.0989456	0	0
386	29246	NM_005354_at	29245	-13.8642	-2.2626	0.163198	0.208397	0	0
387	18821	4128711_at	18820	-13.859	-1.91492	0.138172	0.265187	0	0
388	47855	XM_001132336_at	47854	-13.8504	-1.82266	0.131596	0.2827	0	0
389	18771	4128548_at	18770	-13.8337	-2.35824	0.170471	0.195029	0	0
390	23796	NM_001031696_at	23795	-13.8296	-2.10094	0.151916	0.233106	0	0
391	13030	4106567_at	13029	-13.8077	-3.30019	0.239011	0.101518	0	0
392	6100	4079989_at	6099	-13.7806	-3.10813	0.225544	0.115974	0	0
393	29268	NM_005380_at	29267	-13.779	-1.8953	0.13755	0.268818	0	0
394	41575	NM_172197_at	41574	-13.775	-3.53709	0.256776	0.0861447	0	0
395	44670	NM_213647_at	44669	-13.7729	-1.96043	0.14234	0.256951	0	0
396	31179	NM_012181_at	31178	-13.7709	-1.91779	0.139264	0.26466	0	0
397	34004	NM_017849_at	34003	-13.7675	-1.60631	0.116674	0.328438	0	0
398	307	4057422_at	306	-13.7398	-4.79744	0.349164	0.0359605	0	0
399	1602	4062210_at	1601	-13.7315	-3.39381	0.247154	0.0951399	0	0
400	28061	NM_004078_at	28060	-13.7302	-2.24413	0.163445	0.211081	0	0
401	29783	NM_005938_at	29782	-13.7262	-1.64238	0.119652	0.320329	0	0
402	2393	4065331_at	2392	-13.7246	-3.17451	0.231302	0.110758	0	0
403	26443	NM_002340_at	26442	-13.717	-1.91712	0.139762	0.264783	0	0
404	12426	4104347_at	12425	-13.7151	-1.96909	0.143571	0.255414	0	0
405	2589	4066124_at	2588	-13.7051	-4.58017	0.334193	0.0418054	0	0
406	15702	4116755_at	15701	-13.7029	-5.24747	0.382946	0.0263242	0	0
407	32931	NM_015658_at	32930	-13.7026	-1.86087	0.135804	0.275311	0	0
408	36830	NM_024841_at	36829	-13.6986	-2.46323	0.179816	0.18134	0	0
409	37928	NM_032548_at	37927	-13.697	-1.62151	0.118385	0.324995	0	0
410	41512	NM_172028_at	41511	-13.697	-1.62151	0.118385	0.324995	0	0
411	19116	4129792_at	19115	-13.6944	-2.3049	0.16831	0.202374	0	0
412	17284	4122768_at	17283	-13.6937	-2.05813	0.150297	0.240128	0	0
413	2289	4064916_at	2288	-13.6893	-2.03027	0.148311	0.24481	0	0
414	15932	4117619_at	15931	-13.6848	-4.34094	0.317209	0.0493454	0	0
415	7760	4086404_at	7759	-13.6772	-3.2476	0.237446	0.105287	0	0
416	4238	4072456_at	4237	-13.6682	-2.6683	0.19522	0.157312	0	0
417	51213	XM_940438_at	51212	-13.6605	-2.2605	0.165477	0.208699	0	0
418	28721	NM_004785_at	28720	-13.6417	-2.49881	0.183174	0.176923	0	0
419	25934	NM_001795_at	25933	-13.6296	-2.71217	0.198991	0.152601	0	0
420	2141	4064346_at	2140	-13.6235	-2.5135	0.184498	0.175131	0	0
421	26774	NM_002695_at	26773	-13.6206	-2.26765	0.166487	0.207667	0	0
422	38395	NM_033256_at	38394	-13.6201	-2.28151	0.16751	0.205682	0	0
423	10143	4095534_at	10142	-13.6172	-1.97295	0.144886	0.254731	0	0
424	1235	4060824_at	1234	-13.6137	-2.7286	0.20043	0.150873	0	0
425	30773	NM_007021_at	30772	-13.6127	-3.06265	0.224985	0.119688	0	0
426	634	4058617_at	633	-13.6109	-3.67228	0.269803	0.0784394	0	0
427	41617	NM_172341_at	41616	-13.6056	-2.03829	0.149813	0.243452	0	0
428	7782	4086486_at	7781	-13.602	-2.74566	0.201858	0.149099	0	0
429	38541	NM_033513_at	38540	-13.5951	-1.8297	0.134585	0.281323	0	0
430	2483	4065716_at	2482	-13.5936	-2.17218	0.159794	0.221875	0	0
431	4962	4075373_at	4961	-13.5874	-4.32487	0.3183	0.049898	0	0
432	17644	4124296_at	17643	-13.5835	-4.89366	0.360264	0.0336405	0	0
433	10165	4095615_at	10164	-13.5792	-3.28664	0.242035	0.102476	0	0
434	1089	4060328_at	1088	-13.5765	-3.52011	0.25928	0.0871649	0	0
435	10497	4096858_at	10496	-13.5721	-4.58636	0.337925	0.0416264	0	0
436	9676	4093805_at	9675	-13.571	-2.61689	0.192829	0.163018	0	0
437	11185	4099513_at	11184	-13.564	-2.73383	0.20155	0.150326	0	0
438	29461	NM_005585_at	29460	-13.5576	-2.37022	0.174826	0.193416	0	0
439	54431	XR_017634_at	54430	-13.5515	-2.10259	0.155155	0.23284	0	0
440	17834	4125000_at	17833	-13.5506	-2.12423	0.156763	0.229374	0	0
441	35794	NM_021805_at	35793	-13.5498	-1.60363	0.118351	0.329048	0	0
442	10963	4098645_at	10962	-13.5448	-2.39778	0.177025	0.189757	0	0
443	4497	4073541_at	4496	-13.5075	-2.80974	0.208013	0.142621	0	0
444	28023	NM_004040_at	28022	-13.5067	-2.41561	0.178845	0.187425	0	0
445	13612	4108830_at	13611	-13.4889	-2.67225	0.198108	0.156882	0	0
446	48637	XM_001134401_at	48636	-13.4858	-2.53495	0.187971	0.172546	0	0
447	17213	4122521_at	17212	-13.48	-1.78978	0.132774	0.289216	0	0
448	1146	4060492_at	1145	-13.479	-3.26454	0.242195	0.104058	0	0
449	453	4057979_at	452	-13.4715	-2.53665	0.188297	0.172343	0	0
450	19659	4131912_at	19658	-13.4715	-1.91112	0.141864	0.265886	0	0
451	24399	NM_001040167_at	24398	-13.4701	-1.71279	0.127155	0.305069	0	0
452	49837	XM_929529_at	49836	-13.4537	-2.28016	0.169482	0.205875	0	0
453	50744	XM_938039_at	50743	-13.4537	-2.28016	0.169482	0.205875	0	0
454	14473	4112132_at	14472	-13.4432	-4.37695	0.325589	0.048129	0	0
455	3304	4068895_at	3303	-13.4327	-3.22415	0.240024	0.107012	0	0
456	10337	4096241_at	10336	-13.4291	-1.60189	0.119286	0.329444	0	0
457	5339	4076855_at	5338	-13.4285	-2.88604	0.214919	0.135275	0	0
458	26717	NM_002626_at	26716	-13.4229	-1.70425	0.126966	0.30688	0	0
459	12995	4106436_at	12994	-13.4176	-3.51698	0.262116	0.0873542	0	0
460	13698	4109190_at	13697	-13.417	-2.68557	0.200162	0.15544	0	0
461	31255	NM_012268_at	31254	-13.4121	-1.99839	0.149	0.250278	0	0
462	18949	4129166_at	18948	-13.3984	-3.90211	0.291238	0.0668878	0	0
463	45797	XM_001127162_at	45796	-13.3943	-2.94258	0.21969	0.130075	0	0
464	25982	NM_001848_at	25981	-13.3908	-1.95205	0.145776	0.258449	0	0
465	9072	4091506_at	9071	-13.3877	-5.15236	0.384857	0.0281181	0	0
466	2617	4066224_at	2616	-13.3836	-1.90515	0.142349	0.266989	0	0
467	2810	4067048_at	2809	-13.3574	-1.79956	0.134724	0.287263	0	0
468	852	4059436_at	851	-13.3543	-2.52316	0.18894	0.173962	0	0
469	10841	4098212_at	10840	-13.3543	-3.62727	0.271619	0.0809251	0	0
470	46075	XM_001127865_at	46074	-13.3327	-2.04656	0.153499	0.24206	0	0
471	46107	XM_001127947_at	46106	-13.3327	-2.04656	0.153499	0.24206	0	0
472	677	4058805_at	676	-13.3258	-2.07441	0.155669	0.237432	0	0
473	15556	4116180_at	15555	-13.3119	-3.25738	0.244696	0.104576	0	0
474	41680	NM_173157_at	41679	-13.3108	-2.62437	0.197161	0.162176	0	0
475	10057	4095212_at	10056	-13.3026	-2.23504	0.168016	0.212415	0	0
476	2193	4064553_at	2192	-13.283	-3.21695	0.242186	0.107548	0	0
477	8201	4088121_at	8200	-13.2757	-3.40716	0.256646	0.094263	0	0
478	3859	4071075_at	3858	-13.2698	-5.21772	0.393203	0.0268726	0	0
479	17251	4122648_at	17250	-13.2649	-2.29174	0.172768	0.204229	0	0
480	2366	4065212_at	2365	-13.2619	-2.53518	0.191162	0.172519	0	0
481	31613	NM_013443_at	31612	-13.2549	-1.9371	0.146142	0.261141	0	0
482	12849	4105917_at	12848	-13.2534	-3.12609	0.235871	0.114539	0	0
483	32282	NM_014798_at	32281	-13.2506	-2.03978	0.153938	0.243202	0	0
484	36286	NM_022963_at	36285	-13.2467	-1.94888	0.147122	0.259017	0	0
485	1574	4062113_at	1573	-13.2406	-3.59659	0.271633	0.0826645	0	0
486	14737	4113113_at	14736	-13.24	-3.38409	0.255596	0.0957826	0	0
487	9374	4092736_at	9373	-13.2381	-3.55503	0.268545	0.0850806	0	0
488	6827	4082803_at	6826	-13.2353	-3.21145	0.242642	0.107959	0	0
489	15159	4114669_at	15158	-13.2339	-6.38606	0.482553	0.0119565	0	0
490	28274	NM_004309_at	28273	-13.2221	-1.77809	0.134479	0.291569	0	0
491	43777	NM_198969_at	43776	-13.2208	-1.96209	0.148409	0.256657	0	0
492	30696	NM_006927_at	30695	-13.2066	-1.78626	0.135255	0.289922	0	0
493	13208	4107250_at	13207	-13.1994	-2.0681	0.156681	0.238474	0	0
494	23654	NM_001025239_at	23653	-13.1961	-2.09569	0.158812	0.233956	0	0
495	20295	4134309_at	20294	-13.193	-4.13567	0.313476	0.0568903	0	0
496	894	4059618_at	893	-13.1918	-3.1132	0.235995	0.115567	0	0
497	28252	NM_004285_at	28251	-13.1736	-2.04479	0.155219	0.242357	0	0
498	9401	4092834_at	9400	-13.1722	-4.03939	0.30666	0.0608168	0	0
499	1493	4061828_at	1492	-13.1721	-2.46882	0.187427	0.180639	0	0
500	43111	NM_182838_at	43110	-13.1718	-2.0717	0.157282	0.237879	0	0
501	42316	NM_177938_at	42315	-13.1712	-1.632	0.123907	0.32264	0	0
502	20611	4135524_at	20610	-13.1686	-2.71715	0.206336	0.152074	0	0
503	25764	NM_001619_at	25763	-13.1616	-1.63863	0.124501	0.32116	0	0
504	6016	4079647_at	6015	-13.161	-2.56656	0.195013	0.168806	0	0
505	24771	NM_001048251_at	24770	-13.161	-1.72111	0.130774	0.303314	0	0
506	19416	4130985_at	19415	-13.16	-2.19317	0.166654	0.21867	0	0
507	17864	4125127_at	17863	-13.1425	-2.67924	0.203861	0.156124	0	0
508	6963	4083301_at	6962	-13.1387	-3.26877	0.248789	0.103754	0	0
509	20740	4136064_at	20739	-13.1316	-2.00342	0.152566	0.249407	0	0
510	43376	NM_198042_at	43375	-13.1278	-1.81281	0.138089	0.284637	0	0
511	15191	4114786_at	15190	-13.1276	-1.93886	0.147694	0.260822	0	0
512	1606	4062225_at	1605	-13.1255	-4.14778	0.316009	0.0564151	0	0
513	771	4059160_at	770	-13.1231	-1.82401	0.138992	0.282434	0	0
514	5485	4077438_at	5484	-13.1218	-2.63872	0.201095	0.16057	0	0
515	2244	4064777_at	2243	-13.1164	-2.14548	0.163573	0.22602	0	0
516	10383	4096416_at	10382	-13.1116	-2.3732	0.181	0.193017	0	0
517	34992	NM_020145_at	34991	-13.1107	-1.82017	0.138831	0.283187	0	0
518	10565	4097156_at	10564	-13.1098	-2.33513	0.178122	0.198178	0	0
519	21478	NM_000754_at	21477	-13.106	-1.89217	0.144374	0.269401	0	0
520	24400	NM_001040168_at	24399	-13.1026	-1.67716	0.128002	0.312697	0	0
521	2838	4067142_at	2837	-13.0925	-3.11389	0.237838	0.115512	0	0
522	26984	NM_002910_at	26983	-13.0906	-2.01634	0.15403	0.247185	0	0
523	9141	4091742_at	9140	-13.0795	-3.17093	0.242436	0.111033	0	0
524	30319	NM_006521_at	30318	-13.0469	-1.82521	0.139896	0.282201	0	0
525	4880	4075050_at	4879	-13.0468	-4.33049	0.331919	0.0497042	0	0
526	29175	NM_005273_at	29174	-13.0432	-1.73707	0.133178	0.299979	0	0
527	51185	XM_940268_at	51184	-13.0414	-2.16085	0.165692	0.223625	0	0
528	29872	NM_006039_at	29871	-13.035	-1.91696	0.147062	0.264813	0	0
529	20357	4134544_at	20356	-13.0332	-3.93712	0.302085	0.0652841	0	0
530	16560	4119902_at	16559	-13.0314	-4.20246	0.322486	0.0543169	0	0
531	27968	NM_003977_at	27967	-13.0276	-1.77948	0.136593	0.291289	0	0
532	35664	NM_021198_at	35663	-13.0264	-1.79335	0.13767	0.288501	0	0
533	7753	4086385_at	7752	-13.024	-4.33268	0.332669	0.0496288	0	0
534	1618	4062288_at	1617	-13.0187	-2.61903	0.201175	0.162778	0	0
535	26964	NM_002889_at	26963	-13.0172	-2.56653	0.197164	0.16881	0	0
536	5077	4075839_at	5076	-13.0165	-1.92964	0.148246	0.262494	0	0
537	20131	4133593_at	20130	-13.0148	-2.33813	0.179652	0.197766	0	0
538	29395	NM_005516_at	29394	-13.0092	-2.6131	0.200865	0.163448	0	0
539	9332	4092548_at	9331	-13.0069	-3.54621	0.272641	0.0856023	0	0
540	15542	4116133_at	15541	-13.0042	-2.6559	0.204235	0.158669	0	0
541	6561	4081683_at	6560	-13.0031	-2.23095	0.17157	0.213019	0	0
542	42705	NM_181553_at	42704	-13.0029	-1.76174	0.135489	0.294892	0	0
543	399	4057756_at	398	-12.9944	-1.76614	0.135915	0.293994	0	0
544	15423	4115657_at	15422	-12.9842	-4.22059	0.325056	0.0536385	0	0
545	1202	4060659_at	1201	-12.9839	-2.85894	0.220191	0.137839	0	0
546	3345	4069062_at	3344	-12.9781	-3.39142	0.26132	0.0952971	0	0
547	45459	XM_001126256_at	45458	-12.9767	-2.1288	0.164048	0.228648	0	0
548	31002	NM_007286_at	31001	-12.9696	-1.71035	0.131873	0.305586	0	0
549	32109	NM_014599_at	32108	-12.9642	-1.89552	0.146212	0.268776	0	0
550	6086	4079942_at	6085	-12.9622	-3.93998	0.30396	0.0651552	0	0
551	13871	4109805_at	13870	-12.9588	-3.03581	0.234266	0.121935	0	0
552	23250	NM_001014431_at	23249	-12.9586	-1.76279	0.136032	0.294677	0	0
553	7922	4087073_at	7921	-12.9575	-3.23294	0.249503	0.106362	0	0
554	19005	4129363_at	19004	-12.9522	-2.23616	0.172647	0.212251	0	0
555	15405	4115576_at	15404	-12.9511	-2.40273	0.185524	0.189106	0	0
556	1062	4060202_at	1061	-12.9411	-2.71147	0.209525	0.152674	0	0
557	6030	4079704_at	6029	-12.938	-1.94046	0.149981	0.260534	0	0
558	18168	4126246_at	18167	-12.9305	-3.4494	0.266765	0.0915433	0	0
559	26257	NM_002135_at	26256	-12.9278	-2.57681	0.199323	0.167611	0	0
560	8914	4090934_at	8913	-12.9241	-2.25508	0.174486	0.209485	0	0
561	12423	4104327_at	12422	-12.9216	-1.65712	0.128244	0.317072	0	0
562	15489	4115926_at	15488	-12.9192	-3.17413	0.245691	0.110788	0	0
563	51520	XM_941911_at	51519	-12.9183	-1.83403	0.141972	0.28048	0	0
564	2645	4066352_at	2644	-12.9176	-1.98071	0.153334	0.253365	0	0
565	5094	4075892_at	5093	-12.9101	-2.48227	0.192273	0.178963	0	0
566	5632	4078032_at	5631	-12.9011	-2.01782	0.156407	0.24693	0	0
567	9046	4091427_at	9045	-12.8931	-2.2057	0.171076	0.216779	0	0
568	11328	4100042_at	11327	-12.8928	-2.17401	0.168623	0.221594	0	0
569	32964	NM_015703_at	32963	-12.8873	-2.25827	0.175233	0.209022	0	0
570	8471	4089263_at	8470	-12.8601	-2.22963	0.173375	0.213214	0	0
571	14294	4111471_at	14293	-12.8472	-4.98167	0.387763	0.0316497	0	0
572	13568	4108638_at	13567	-12.8426	-2.76017	0.214922	0.147607	0	0
573	7102	4083789_at	7101	-12.8361	-3.95313	0.307969	0.064564	0	0
574	3613	4070088_at	3612	-12.8319	-2.4472	0.190713	0.183366	0	0
575	3127	4068232_at	3126	-12.8274	-3.11853	0.243114	0.115141	0	0
576	15078	4114332_at	15077	-12.8241	-3.18184	0.248114	0.110197	0	0
577	50470	XM_936571_at	50469	-12.8223	-2.33871	0.182394	0.197687	0	0
578	36585	NM_024552_at	36584	-12.8195	-1.63193	0.127301	0.322656	0	0
579	41737	NM_173452_at	41736	-12.8155	-3.53235	0.27563	0.0864285	0	0
580	9594	4093538_at	9593	-12.8062	-4.19246	0.327379	0.0546943	0	0
581	25806	NM_001663_at	25805	-12.7872	-1.83584	0.143569	0.280127	0	0
582	40647	NM_152346_at	40646	-12.7848	-1.82848	0.14302	0.28156	0	0
583	3399	4069279_at	3398	-12.7694	-3.44231	0.269574	0.0919944	0	0
584	33809	NM_017617_at	33808	-12.7511	-1.95893	0.153628	0.25722	0	0
585	10730	4097763_at	10729	-12.7509	-1.97268	0.154709	0.254779	0	0
586	27674	NM_003665_at	27673	-12.7509	-3.34314	0.262189	0.0985407	0	0
587	19301	4130518_at	19300	-12.7486	-3.06318	0.240275	0.119644	0	0
588	1897	4063370_at	1896	-12.7388	-4.45322	0.349579	0.0456506	0	0
589	5090	4075881_at	5089	-12.7321	-2.38753	0.18752	0.19111	0	0
590	2247	4064782_at	2246	-12.721	-3.23427	0.254247	0.106264	0	0
591	31471	NM_013265_at	31470	-12.716	-2.00187	0.157429	0.249677	0	0
592	51565	XM_942145_at	51564	-12.7147	-2.18661	0.171975	0.219667	0	0
593	30569	NM_006795_at	30568	-12.7078	-1.87011	0.147163	0.273552	0	0
594	4647	4074151_at	4646	-12.7073	-5.3328	0.419664	0.0248123	0	0
595	1891	4063329_at	1890	-12.6957	-4.11135	0.323839	0.0578577	0	0
596	21757	NM_001001522_at	21756	-12.6955	-2.718	0.214092	0.151985	0	0
597	16327	4119035_at	16326	-12.6922	-4.28563	0.337658	0.051274	0	0
598	16501	4119659_at	16500	-12.6878	-2.12357	0.167371	0.229478	0	0
599	43998	NM_201378_at	43997	-12.686	-1.71394	0.135104	0.304827	0	0
600	10759	4097884_at	10758	-12.6826	-3.08916	0.243575	0.117509	0	0
601	36627	NM_024600_at	36626	-12.6803	-2.44239	0.192613	0.183979	0	0
602	44003	NM_201383_at	44002	-12.6797	-1.71428	0.135198	0.304756	0	0
603	51449	XM_941539_at	51448	-12.6773	-2.03651	0.160641	0.243753	0	0
604	7768	4086427_at	7767	-12.6617	-4.13212	0.326347	0.0570307	0	0
605	8955	4091099_at	8954	-12.6563	-2.08373	0.164639	0.235904	0	0
606	43498	NM_198316_at	43497	-12.6558	-2.23285	0.176428	0.212738	0	0
607	41253	NM_153367_at	41252	-12.6437	-1.96494	0.155409	0.25615	0	0
608	15411	4115591_at	15410	-12.6376	-5.84182	0.462257	0.0174356	0	0
609	43975	NM_201222_at	43974	-12.6355	-1.84562	0.146066	0.278236	0	0
610	8421	4089036_at	8420	-12.6313	-4.59664	0.363907	0.0413307	0	0
611	7380	4084905_at	7379	-12.6261	-4.18897	0.331771	0.054827	0	0
612	11278	4099878_at	11277	-12.6088	-2.32836	0.184662	0.19911	0	0
613	250	4057191_at	249	-12.6052	-4.10697	0.325815	0.0580336	0	0
614	33561	NM_016582_at	33560	-12.6012	-2.58225	0.204921	0.166981	0	0
615	24047	NM_001035505_at	24046	-12.5935	-1.71838	0.13645	0.303889	0	0
616	10599	4097286_at	10598	-12.5844	-4.09176	0.325145	0.0586486	0	0
617	25914	NM_001774_at	25913	-12.5832	-2.26812	0.18025	0.2076	0	0
618	26503	NM_002405_at	26502	-12.5769	-2.03462	0.161775	0.244073	0	0
619	22114	NM_001004105_at	22113	-12.5733	-1.66264	0.132236	0.31586	0	0
620	25338	NM_001120_at	25337	-12.5722	-1.5881	0.126319	0.332609	0	0
621	31020	NM_007310_at	31019	-12.5718	-2.13648	0.169942	0.227434	0	0
622	33107	NM_015995_at	33106	-12.5561	-1.88636	0.150235	0.270489	0	0
623	29840	NM_006005_at	29839	-12.5485	-1.72717	0.13764	0.302044	0	0
624	8079	4087700_at	8078	-12.5481	-3.56084	0.283774	0.0847385	0	0
625	42706	NM_181554_at	42705	-12.5476	-1.68713	0.134458	0.310544	0	0
626	18295	4126724_at	18294	-12.5475	-4.26898	0.340227	0.051869	0	0
627	15477	4115887_at	15476	-12.5448	-1.9125	0.152454	0.265631	0	0
628	8107	4087792_at	8106	-12.5433	-3.10966	0.247915	0.115851	0	0
629	11455	4100531_at	11454	-12.5377	-4.31348	0.344042	0.0502937	0	0
630	2358	4065184_at	2357	-12.5374	-2.81452	0.22449	0.142149	0	0
631	1791	4062972_at	1790	-12.5365	-2.47809	0.19767	0.179482	0	0
632	36153	NM_022648_at	36152	-12.5316	-2.63801	0.210508	0.16065	0	0
633	42240	NM_176871_at	42239	-12.5278	-1.84207	0.147039	0.278921	0	0
634	15317	4115305_at	15316	-12.5272	-4.91726	0.392526	0.0330947	0	0
635	10402	4096517_at	10401	-12.5142	-2.06193	0.164767	0.239496	0	0
636	192	4057005_at	191	-12.5127	-1.63048	0.130307	0.32298	0	0
637	45255	XM_001125724_at	45254	-12.5093	-2.22752	0.17807	0.213525	0	0
638	10200	4095750_at	10199	-12.5084	-1.87756	0.150104	0.272143	0	0
639	21210	NM_000445_at	21209	-12.5069	-1.71371	0.137022	0.304875	0	0
640	12789	4105663_at	12788	-12.5039	-2.07889	0.16626	0.236697	0	0
641	31857	NM_014292_at	31856	-12.4954	-1.86557	0.149301	0.274415	0	0
642	13869	4109803_at	13868	-12.4878	-3.71869	0.297786	0.0759562	0	0
643	5554	4077706_at	5553	-12.4854	-2.47165	0.197964	0.180284	0	0
644	42271	NM_177433_at	42270	-12.4833	-1.85019	0.148213	0.277355	0	0
645	5755	4078600_at	5754	-12.4763	-4.19462	0.336207	0.0546128	0	0
646	42348	NM_178000_at	42347	-12.474	-1.69552	0.135924	0.308744	0	0
647	9173	4091890_at	9172	-12.4714	-3.44566	0.276284	0.0917808	0	0
648	26090	NM_001960_at	26089	-12.4654	-2.41034	0.193363	0.188111	0	0
649	24347	NM_001040031_at	24346	-12.4648	-2.23831	0.179571	0.211934	0	0
650	52821	XR_015892_at	52820	-12.4644	-1.72375	0.138293	0.302761	0	0
651	26270	NM_002149_at	26269	-12.4634	-1.99651	0.160189	0.250605	0	0
652	18510	4127584_at	18509	-12.4534	-2.55099	0.204844	0.170637	0	0
653	2011	4063829_at	2010	-12.4521	-1.96325	0.157664	0.256451	0	0
654	32691	NM_015319_at	32690	-12.4432	-2.14162	0.172111	0.226625	0	0
655	29408	NM_005529_at	29407	-12.4397	-1.68148	0.13517	0.311763	0	0
656	27241	NM_003186_at	27240	-12.438	-2.76656	0.222428	0.146955	0	0
657	5656	4078139_at	5655	-12.4261	-1.70102	0.136891	0.307569	0	0
658	6301	4080789_at	6300	-12.426	-3.34476	0.269173	0.0984302	0	0
659	31355	NM_012396_at	31354	-12.4248	-1.72095	0.138508	0.30335	0	0
660	8895	4090868_at	8894	-12.4198	-1.70072	0.136936	0.307633	0	0
661	38388	NM_033247_at	38387	-12.4091	-1.65807	0.133617	0.316862	0	0
662	23691	NM_001025604_at	23690	-12.4024	-2.10684	0.169873	0.232155	0	0
663	13249	4107420_at	13248	-12.4018	-2.20937	0.17815	0.216229	0	0
664	8604	4089769_at	8603	-12.3954	-1.73251	0.13977	0.300928	0	0
665	14249	4111322_at	14248	-12.3863	-2.27235	0.183457	0.206993	0	0
666	17072	4121995_at	17071	-12.3756	-3.50988	0.283613	0.0877852	0	0
667	54388	XR_017590_at	54387	-12.3714	-1.81669	0.146845	0.283872	0	0
668	56124	XR_019467_at	56123	-12.3714	-1.81669	0.146845	0.283872	0	0
669	25309	NM_001089_at	25308	-12.3699	-2.98405	0.241235	0.12639	0	0
670	3563	4069853_at	3562	-12.3651	-3.08128	0.249191	0.118152	0	0
671	7685	4086139_at	7684	-12.3579	-3.29222	0.266406	0.102081	0	0
672	2832	4067119_at	2831	-12.3568	-4.34355	0.35151	0.0492561	0	0
673	28342	NM_004383_at	28341	-12.3529	-1.85511	0.150176	0.276412	0	0
674	44001	NM_201381_at	44000	-12.3501	-1.6795	0.135991	0.31219	0	0
675	19623	4131756_at	19622	-12.3414	-3.27058	0.26501	0.103623	0	0
676	23448	NM_001018057_at	23447	-12.3268	-1.94306	0.157628	0.260064	0	0
677	4386	4073044_at	4385	-12.3267	-4.45129	0.36111	0.0457118	0	0
678	41681	NM_173158_at	41680	-12.3182	-2.2467	0.182389	0.210706	0	0
679	17624	4124234_at	17623	-12.3121	-5.00326	0.406368	0.0311794	0	0
680	43782	NM_198977_at	43781	-12.3105	-1.67415	0.135994	0.31335	0	0
681	44002	NM_201382_at	44001	-12.3013	-1.68915	0.137314	0.310109	0	0
682	5323	4076798_at	5322	-12.2876	-2.76686	0.225175	0.146924	0	0
683	17623	4124217_at	17622	-12.2853	-1.74892	0.142359	0.297524	0	0
684	2590	4066133_at	2589	-12.2793	-2.85458	0.23247	0.138257	0	0
685	16199	4118557_at	16198	-12.2784	-4.56614	0.371883	0.0422138	0	0
686	17600	4124111_at	17599	-12.275	-2.91795	0.237714	0.132315	0	0
687	24181	NM_001039355_at	24180	-12.2722	-1.73846	0.141658	0.299689	0	0
688	23251	NM_001014432_at	23250	-12.2703	-1.68489	0.137314	0.311028	0	0
689	20676	4135790_at	20675	-12.2703	-2.05303	0.167317	0.240977	0	0
690	34036	NM_017883_at	34035	-12.2696	-1.62134	0.132143	0.325033	0	0
691	37573	NM_032038_at	37572	-12.2585	-2.13212	0.17393	0.228123	0	0
692	4426	4073249_at	4425	-12.2544	-2.87335	0.234474	0.136469	0	0
693	43999	NM_201379_at	43998	-12.2366	-1.67199	0.136639	0.313821	0	0
694	4460	4073378_at	4459	-12.2339	-3.84361	0.314177	0.0696558	0	0
695	20347	4134515_at	20346	-12.233	-2.91007	0.237886	0.13304	0	0
696	826	4059328_at	825	-12.2275	-3.07299	0.251318	0.118833	0	0
697	20628	4135599_at	20627	-12.2197	-2.57478	0.210707	0.167847	0	0
698	19123	4129821_at	19122	-12.2188	-1.75589	0.143703	0.296091	0	0
699	18251	4126557_at	18250	-12.2161	-2.18255	0.178661	0.220286	0	0
700	24792	NM_001066_at	24791	-12.2126	-1.79938	0.147338	0.287298	0	0
701	275	4057289_at	274	-12.2073	-2.77479	0.227305	0.146118	0	0
702	35606	NM_021131_at	35605	-12.2066	-1.67861	0.137517	0.312383	0	0
703	2102	4064189_at	2101	-12.1989	-2.7431	0.224865	0.149364	0	0
704	44112	NM_202467_at	44111	-12.1959	-1.82426	0.14958	0.282386	0	0
705	42350	NM_178003_at	42349	-12.1925	-1.68242	0.137988	0.311561	0	0
706	12176	4103394_at	12175	-12.1923	-2.84325	0.2332	0.139347	0	0
707	4766	4074618_at	4765	-12.1905	-3.6353	0.298207	0.0804759	0	0
708	14955	4113871_at	14954	-12.1859	-3.17606	0.260634	0.110639	0	0
709	25545	NM_001348_at	25544	-12.1787	-1.60385	0.131693	0.328997	0	0
710	35876	NM_021965_at	35875	-12.1697	-1.96595	0.161544	0.255971	0	0
711	33963	NM_017805_at	33962	-12.1668	-1.58978	0.130665	0.332222	0	0
712	4103	4071990_at	4102	-12.165	-3.60792	0.296583	0.0820176	0	0
713	7482	4085328_at	7481	-12.1577	-4.21071	0.346341	0.0540069	0	0
714	44000	NM_201380_at	43999	-12.152	-1.66108	0.136691	0.316203	0	0
715	8994	4091246_at	8993	-12.1511	-1.79996	0.148131	0.287182	0	0
716	12764	4105562_at	12763	-12.1372	-3.62401	0.298588	0.0811082	0	0
717	9723	4093957_at	9722	-12.1361	-2.30503	0.189932	0.202356	0	0
718	41480	NM_170754_at	41479	-12.1355	-2.0336	0.167574	0.244244	0	0
719	27718	NM_003713_at	27717	-12.1353	-2.26709	0.186818	0.207749	0	0
720	8989	4091226_at	8988	-12.1283	-2.92583	0.241239	0.131595	0	0
721	44971	NR_002797_at	44970	-12.1214	-1.87292	0.154513	0.273021	0	0
722	16172	4118467_at	16171	-12.1213	-3.29821	0.2721	0.101658	0	0
723	21622	NM_000906_at	21621	-12.1117	-1.97162	0.162786	0.254967	0	0
724	26343	NM_002225_at	26342	-12.1086	-1.92536	0.159008	0.263275	0	0
725	28179	NM_004207_at	28178	-12.1029	-1.83609	0.151706	0.28008	0	0
726	37889	NM_032493_at	37888	-12.0958	-1.83997	0.152116	0.279327	0	0
727	17557	4123909_at	17556	-12.0947	-2.80773	0.232144	0.14282	0	0
728	21655	NM_000941_at	21654	-12.0924	-2.0731	0.171439	0.237649	0	0
729	29446	NM_005567_at	29445	-12.0923	-2.12955	0.176107	0.228529	0	0
730	17332	4122992_at	17331	-12.0849	-3.59995	0.297888	0.082472	0	0
731	25331	NM_001112_at	25330	-12.0818	-2.0852	0.172591	0.235664	0	0
732	43796	NM_199002_at	43795	-12.0787	-1.67136	0.138373	0.313957	0	0
733	19226	4130244_at	19225	-12.0756	-2.40675	0.199308	0.18858	0	0
734	52786	XR_015856_at	52785	-12.0729	-3.3719	0.279295	0.0965954	0	0
735	6316	4080846_at	6315	-12.0704	-3.87903	0.321367	0.0679665	0	0
736	18554	4127780_at	18553	-12.0679	-2.2743	0.188459	0.206712	0	0
737	17857	4125088_at	17856	-12.0605	-1.83944	0.152519	0.279429	0	0
738	28645	NM_004706_at	28644	-12.0572	-1.65971	0.137653	0.316504	0	0
739	43663	NM_198589_at	43662	-12.0546	-1.83253	0.152019	0.280771	0	0
740	28317	NM_004356_at	28316	-12.0532	-2.56379	0.212707	0.16913	0	0
741	26435	NM_002332_at	26434	-12.0477	-2.65738	0.220571	0.158507	0	0
742	22513	NM_001005914_at	22512	-12.0436	-1.72858	0.143528	0.301748	0	0
743	28586	NM_004636_at	28585	-12.0436	-1.72858	0.143528	0.301748	0	0
744	12734	4105461_at	12733	-12.0419	-1.88506	0.156542	0.270733	0	0
745	5872	4079065_at	5871	-12.0398	-2.15037	0.178605	0.225255	0	0
746	10471	4096763_at	10470	-12.0396	-3.08981	0.256638	0.117456	0	0
747	42014	NM_174918_at	42013	-12.0393	-2.93497	0.243783	0.130763	0	0
748	19485	4131259_at	19484	-12.0372	-2.74946	0.228413	0.148707	0	0
749	6853	4082895_at	6852	-12.0331	-2.15208	0.178846	0.224988	0	0
750	9189	4091949_at	9188	-12.0281	-2.31591	0.192542	0.200836	0	0
751	30497	NM_006715_at	30496	-12.0203	-1.6862	0.140279	0.310745	0	0
752	15441	4115711_at	15440	-12.0165	-4.5759	0.380802	0.0419292	0	0
753	9858	4094507_at	9857	-12.0149	-2.05373	0.170933	0.240861	0	0
754	10269	4095992_at	10268	-12.0144	-1.67932	0.139775	0.31223	0	0
755	39865	NM_139278_at	39864	-12.0048	-1.82005	0.151611	0.28321	0	0
756	49595	XM_927196_at	49594	-11.9906	-1.89059	0.157673	0.269696	0	0
757	539	4058278_at	538	-11.9891	-4.62435	0.385712	0.0405446	0	0
758	37262	NM_030930_at	37261	-11.9847	-2.0848	0.173956	0.235729	0	0
759	623	4058566_at	622	-11.9839	-2.71772	0.226782	0.152014	0	0
760	18626	4128019_at	18625	-11.9748	-4.09518	0.341983	0.0585099	0	0
761	10991	4098752_at	10990	-11.971	-2.31544	0.19342	0.200901	0	0
762	8149	4087969_at	8148	-11.969	-3.86253	0.322711	0.0687484	0	0
763	16119	4118292_at	16118	-11.9615	-4.1557	0.347423	0.0561061	0	0
764	44004	NM_201384_at	44003	-11.9612	-1.64414	0.137456	0.319937	0	0
765	44114	NM_202469_at	44113	-11.9611	-1.8203	0.152184	0.283163	0	0
766	13715	4109261_at	13714	-11.9596	-3.81631	0.3191	0.0709867	0	0
767	23322	NM_001015881_at	23321	-11.9582	-3.03659	0.253933	0.12187	0	0
768	6498	4081500_at	6497	-11.9527	-2.93957	0.245935	0.130347	0	0
769	17775	4124794_at	17774	-11.9508	-2.23555	0.187063	0.212341	0	0
770	19346	4130710_at	19345	-11.9489	-2.17756	0.18224	0.221049	0	0
771	39331	NM_133459_at	39330	-11.9449	-2.01385	0.168596	0.247611	0	0
772	12879	4106031_at	12878	-11.9442	-4.2626	0.356877	0.0520989	0	0
773	2464	4065653_at	2463	-11.9439	-2.27009	0.190062	0.207317	0	0
774	32435	NM_014972_at	32434	-11.9356	-1.66736	0.139696	0.314829	0	0
775	9629	4093647_at	9628	-11.9317	-4.01121	0.336182	0.0620163	0	0
776	21053	NM_000285_at	21052	-11.9313	-2.05876	0.172551	0.240022	0	0
777	19389	4130873_at	19388	-11.9298	-2.44826	0.205222	0.183232	0	0
778	30979	NM_007263_at	30978	-11.9287	-1.59839	0.133996	0.330246	0	0
779	35715	NM_021259_at	35714	-11.9227	-1.81739	0.152432	0.283734	0	0
780	50236	XM_933715_at	50235	-11.9225	-2.60404	0.218415	0.164477	0	0
781	51990	XM_944844_at	51989	-11.9225	-2.60404	0.218415	0.164477	0	0
782	37297	NM_030971_at	37296	-11.92	-1.61757	0.135703	0.325884	0	0
783	14919	4113765_at	14918	-11.917	-2.88703	0.242261	0.135182	0	0
784	46595	XM_001129237_at	46594	-11.91	-3.02658	0.254121	0.122718	0	0
785	42349	NM_178001_at	42348	-11.9094	-1.60679	0.134918	0.328328	0	0
786	3047	4067983_at	3046	-11.9019	-4.69467	0.394449	0.0386156	0	0
787	32826	NM_015493_at	32825	-11.9006	-1.73656	0.145922	0.300085	0	0
788	26042	NM_001909_at	26041	-11.898	-2.79137	0.234608	0.144448	0	0
789	32423	NM_014957_at	32422	-11.8942	-1.97009	0.165634	0.255238	0	0
790	17513	4123736_at	17512	-11.89	-3.05402	0.256855	0.120406	0	0
791	31459	NM_013253_at	31458	-11.8875	-1.86145	0.156589	0.2752	0	0
792	15275	4115100_at	15274	-11.8869	-2.9981	0.252218	0.125165	0	0
793	25493	NM_001287_at	25492	-11.8841	-1.71341	0.144177	0.304937	0	0
794	998	4059952_at	997	-11.8711	-4.28341	0.360826	0.0513528	0	0
795	11574	4100968_at	11573	-11.8706	-4.18884	0.352875	0.0548318	0	0
796	7957	4087205_at	7956	-11.8645	-2.19071	0.184645	0.219043	0	0
797	47441	XM_001131399_at	47440	-11.857	-2.76406	0.233117	0.147209	0	0
798	47454	XM_001131436_at	47453	-11.857	-2.76406	0.233117	0.147209	0	0
799	11436	4100431_at	11435	-11.8522	-2.56955	0.2168	0.168456	0	0
800	29070	NM_005163_at	29069	-11.8484	-1.64203	0.138586	0.320406	0	0
801	29307	NM_005424_at	29306	-11.8424	-1.92158	0.162262	0.263965	0	0
802	51217	XM_940462_at	51216	-11.8339	-3.17065	0.267929	0.111055	0	0
803	38649	NM_052880_at	38648	-11.8316	-2.17343	0.183697	0.221683	0	0
804	12676	4105275_at	12675	-11.8273	-2.45793	0.207819	0.182007	0	0
805	44183	NM_203386_at	44182	-11.8262	-1.83367	0.155051	0.28055	0	0
806	13914	4109960_at	13913	-11.826	-3.92494	0.331892	0.0658376	0	0
807	44116	NM_202494_at	44115	-11.825	-1.79469	0.151771	0.288234	0	0
808	11332	4100058_at	11331	-11.812	-4.48122	0.379379	0.0447731	0	0
809	5274	4076629_at	5273	-11.8051	-3.33632	0.282616	0.0990077	0	0
810	13391	4107948_at	13390	-11.802	-2.66323	0.22566	0.157866	0	0
811	29705	NM_005854_at	29704	-11.8001	-2.18984	0.185579	0.219176	0	0
812	5571	4077791_at	5570	-11.8	-3.06333	0.259604	0.119632	0	0
813	15186	4114758_at	15185	-11.7941	-3.49263	0.296134	0.0888412	0	0
814	5227	4076419_at	5226	-11.791	-3.18482	0.270107	0.10997	0	0
815	21510	NM_000789_at	21509	-11.785	-2.52976	0.214659	0.173168	0	0
816	12726	4105440_at	12725	-11.7801	-2.32333	0.197226	0.199805	0	0
817	16689	4120438_at	16688	-11.7773	-3.06313	0.260087	0.119648	0	0
818	44184	NM_203387_at	44183	-11.774	-1.84471	0.156677	0.278412	0	0
819	32213	NM_014719_at	32212	-11.7737	-1.61316	0.137014	0.326882	0	0
820	12444	4104414_at	12443	-11.7705	-2.19095	0.18614	0.219007	0	0
821	14838	4113497_at	14837	-11.7701	-2.39044	0.203094	0.190725	0	0
822	45373	XM_001126057_at	45372	-11.7676	-2.59588	0.220596	0.16541	0	0
823	47543	XM_001131611_at	47542	-11.7676	-2.59588	0.220596	0.16541	0	0
824	44701	NR_000011_at	44700	-11.7581	-1.97662	0.168106	0.254085	0	0
825	8987	4091209_at	8986	-11.7495	-1.98233	0.168716	0.253082	0	0
826	38389	NM_033249_at	38388	-11.7495	-1.64593	0.140085	0.31954	0	0
827	6512	4081542_at	6511	-11.7405	-1.62625	0.138516	0.32393	0	0
828	39606	NM_138632_at	39605	-11.7375	-1.78255	0.151868	0.29067	0	0
829	17512	4123733_at	17511	-11.7316	-3.85202	0.328347	0.0692512	0	0
830	2320	4065033_at	2319	-11.7284	-2.24267	0.191217	0.211295	0	0
831	7530	4085526_at	7529	-11.7272	-2.42341	0.206649	0.186415	0	0
832	6365	4081021_at	6364	-11.719	-2.78132	0.237333	0.145459	0	0
833	7277	4084474_at	7276	-11.7139	-3.79174	0.323697	0.0722057	0	0
834	8805	4090522_at	8804	-11.7132	-3.16671	0.270353	0.111359	0	0
835	3076	4068067_at	3075	-11.7055	-3.68664	0.314949	0.0776626	0	0
836	11925	4102341_at	11924	-11.687	-3.61643	0.30944	0.0815355	0	0
837	23140	NM_001013255_at	23139	-11.6698	-2.24035	0.191979	0.211635	0	0
838	5269	4076605_at	5268	-11.669	-1.81873	0.15586	0.28347	0	0
839	35597	NM_021117_at	35596	-11.6675	-1.58651	0.135976	0.332977	0	0
840	51157	XM_940120_at	51156	-11.6651	-2.51979	0.216011	0.174368	0	0
841	30788	NM_007037_at	30787	-11.6629	-1.62426	0.139267	0.324376	0	0
842	8489	4089350_at	8488	-11.6584	-3.13778	0.269144	0.113615	0	0
843	2130	4064311_at	2129	-11.6549	-3.16494	0.271554	0.111496	0	0
844	20602	4135490_at	20601	-11.6501	-2.16342	0.185701	0.223226	0	0
845	6718	4082387_at	6717	-11.6464	-1.73064	0.1486	0.301317	0	0
846	5403	4077113_at	5402	-11.6461	-2.51039	0.215557	0.175508	0	0
847	20450	4134918_at	20449	-11.6434	-3.33641	0.286549	0.0990009	0	0
848	16955	4121509_at	16954	-11.6428	-3.31679	0.284878	0.100357	0	0
849	2616	4066223_at	2615	-11.6379	-2.21859	0.190635	0.214852	0	0
850	8281	4088448_at	8280	-11.6281	-5.03986	0.43342	0.0303985	0	0
851	13502	4108373_at	13501	-11.627	-2.30252	0.198032	0.202708	0	0
852	15561	4116199_at	15560	-11.6236	-3.63265	0.312525	0.0806239	0	0
853	21183	NM_000418_at	21182	-11.6203	-2.21583	0.190686	0.215262	0	0
854	5867	4079037_at	5866	-11.6178	-2.10695	0.181356	0.232137	0	0
855	37814	NM_032389_at	37813	-11.6151	-1.6678	0.143589	0.314734	0	0
856	38466	NM_033375_at	38465	-11.6146	-1.98797	0.171162	0.252093	0	0
857	32237	NM_014745_at	32236	-11.6102	-1.62526	0.139986	0.324152	0	0
858	3005	4067758_at	3004	-11.6013	-2.23953	0.193042	0.211755	0	0
859	14057	4110569_at	14056	-11.6003	-3.4561	0.297933	0.091119	0	0
860	18438	4127321_at	18437	-11.5986	-3.23622	0.279018	0.106121	0	0
861	4434	4073262_at	4433	-11.595	-2.73485	0.235865	0.15022	0	0
862	25397	NM_001183_at	25396	-11.5936	-1.72436	0.148733	0.302634	0	0
863	17942	4125405_at	17941	-11.5895	-2.41212	0.20813	0.18788	0	0
864	2652	4066378_at	2651	-11.5843	-3.41963	0.295195	0.0934523	0	0
865	36478	NM_024298_at	36477	-11.5827	-1.62878	0.140621	0.323362	0	0
866	11107	4099216_at	11106	-11.5816	-2.20827	0.190671	0.216394	0	0
867	3098	4068137_at	3097	-11.5815	-4.54962	0.392835	0.0427001	0	0
868	17492	4123657_at	17491	-11.5766	-2.5511	0.220367	0.170625	0	0
869	2879	4067311_at	2878	-11.5731	-2.11698	0.182923	0.230529	0	0
870	16549	4119843_at	16548	-11.5713	-2.11212	0.182531	0.231308	0	0
871	6024	4079682_at	6023	-11.5677	-2.57468	0.222575	0.167859	0	0
872	19764	4132286_at	19763	-11.5628	-2.44079	0.21109	0.184183	0	0
873	1227	4060788_at	1226	-11.5593	-4.4816	0.387705	0.0447613	0	0
874	19289	4130491_at	19288	-11.5587	-2.83441	0.245219	0.140203	0	0
875	36527	NM_024419_at	36526	-11.5531	-1.6618	0.14384	0.316045	0	0
876	3296	4068875_at	3295	-11.5463	-2.57638	0.223133	0.167662	0	0
877	11309	4099985_at	11308	-11.5419	-3.67284	0.318218	0.078409	0	0
878	5562	4077754_at	5561	-11.5389	-3.21132	0.278304	0.107968	0	0
879	37245	NM_030912_at	37244	-11.5354	-1.91746	0.166224	0.26472	0	0
880	27315	NM_003277_at	27314	-11.5353	-1.93264	0.167541	0.261949	0	0
881	13970	4110215_at	13969	-11.5322	-1.67087	0.144888	0.314064	0	0
882	12754	4105540_at	12753	-11.5206	-2.28076	0.197972	0.205789	0	0
883	3713	4070498_at	3712	-11.5204	-3.10873	0.269845	0.115926	0	0
884	224	4057088_at	223	-11.5185	-3.11714	0.27062	0.115252	0	0
885	32946	NM_015683_at	32945	-11.5166	-2.21894	0.192673	0.2148	0	0
886	5538	4077638_at	5537	-11.5143	-2.46608	0.214176	0.180982	0	0
887	39726	NM_138961_at	39725	-11.5136	-2.41324	0.209599	0.187734	0	0
888	17779	4124806_at	17778	-11.5058	-1.98797	0.172779	0.252094	0	0
889	107	4056621_at	106	-11.5039	-3.08543	0.268208	0.117813	0	0
890	13512	4108462_at	13511	-11.4904	-2.42716	0.211235	0.185931	0	0
891	2569	4066051_at	2568	-11.4895	-2.13419	0.185752	0.227796	0	0
892	29101	NM_005195_at	29100	-11.4891	-2.32993	0.202794	0.198894	0	0
893	14718	4113044_at	14717	-11.4825	-2.6077	0.227102	0.164061	0	0
894	46810	XM_001129797_at	46809	-11.4789	-2.29028	0.19952	0.204436	0	0
895	21193	NM_000428_at	21192	-11.4758	-2.04519	0.178218	0.24229	0	0
896	47410	XM_001131340_at	47409	-11.4722	-1.9763	0.172268	0.254142	0	0
897	47844	XM_001132316_at	47843	-11.4722	-1.9763	0.172268	0.254142	0	0
898	18897	4128958_at	18896	-11.4706	-2.32952	0.203087	0.19895	0	0
899	26347	NM_002229_at	26346	-11.4636	-2.3726	0.206968	0.193098	0	0
900	9622	4093616_at	9621	-11.4528	-2.39499	0.209119	0.190124	0	0
901	9715	4093930_at	9714	-11.452	-3.61366	0.315548	0.081692	0	0
902	6074	4079880_at	6073	-11.4504	-2.84033	0.248056	0.139628	0	0
903	10489	4096839_at	10488	-11.4466	-2.7896	0.243705	0.144626	0	0
904	25226	NM_001080950_at	25225	-11.4411	-2.00452	0.175204	0.249218	0	0
905	15475	4115876_at	15474	-11.4301	-2.9623	0.259167	0.12831	0	0
906	8625	4089884_at	8624	-11.4263	-3.20672	0.280644	0.108313	0	0
907	14007	4110362_at	14006	-11.4197	-3.10747	0.272116	0.116027	0	0
908	8091	4087759_at	8090	-11.4177	-1.91647	0.16785	0.264902	0	0
909	42376	NM_178126_at	42375	-11.4119	-1.62617	0.142497	0.323948	0	0
910	30717	NM_006949_at	30716	-11.4099	-1.84601	0.16179	0.278161	0	0
911	27821	NM_003820_at	27820	-11.4068	-1.66951	0.146361	0.314361	0	0
912	6939	4083227_at	6938	-11.4061	-1.70731	0.149684	0.30623	0	0
913	12356	4104096_at	12355	-11.4035	-1.7253	0.151295	0.302437	0	0
914	40636	NM_152333_at	40635	-11.4018	-1.59843	0.140191	0.330235	0	0
915	44186	NM_203389_at	44185	-11.3995	-1.78218	0.156338	0.290744	0	0
916	38387	NM_033246_at	38386	-11.3966	-1.77323	0.155593	0.292552	0	0
917	26288	NM_002167_at	26287	-11.395	-2.16922	0.190366	0.22233	0	0
918	17823	4124958_at	17822	-11.3846	-1.84334	0.161915	0.278676	0	0
919	5544	4077672_at	5543	-11.3828	-3.48201	0.305902	0.0894974	0	0
920	27316	NM_003278_at	27315	-11.3818	-1.96803	0.17291	0.255602	0	0
921	16592	4120047_at	16591	-11.3791	-3.7496	0.329517	0.0743463	0	0
922	49490	XM_926195_at	49489	-11.3707	-1.99608	0.175547	0.25068	0	0
923	9196	4091967_at	9195	-11.368	-2.07341	0.182391	0.237597	0	0
924	27960	NM_003969_at	27959	-11.3621	-1.69384	0.149078	0.309103	0	0
925	28070	NM_004089_at	28069	-11.3556	-2.78864	0.245573	0.144723	0	0
926	4552	4073773_at	4551	-11.3494	-2.57665	0.22703	0.16763	0	0
927	8205	4088140_at	8204	-11.3418	-2.33574	0.205942	0.198094	0	0
928	132	4056744_at	131	-11.3359	-3.44902	0.304255	0.0915678	0	0
929	33013	NM_015881_at	33012	-11.3357	-1.83831	0.16217	0.279649	0	0
930	1620	4062301_at	1619	-11.3353	-3.8425	0.338985	0.0697093	0	0
931	13754	4109381_at	13753	-11.3348	-2.12869	0.187801	0.228666	0	0
932	12955	4106308_at	12954	-11.3336	-4.25073	0.375056	0.0525295	0	0
933	44185	NM_203388_at	44184	-11.3303	-1.7584	0.155194	0.295577	0	0
934	18235	4126503_at	18234	-11.3295	-2.70201	0.238493	0.153679	0	0
935	49328	XM_496442_at	49327	-11.3278	-2.19951	0.194169	0.217711	0	0
936	50996	XM_939370_at	50995	-11.3278	-2.19951	0.194169	0.217711	0	0
937	37587	NM_032054_at	37586	-11.3257	-2.31701	0.20458	0.200683	0	0
938	17547	4123846_at	17546	-11.3141	-1.80438	0.159481	0.286304	0	0
939	8064	4087629_at	8063	-11.3134	-3.59042	0.31736	0.0830187	0	0
940	52129	XM_946142_at	52128	-11.312	-1.59903	0.141357	0.330098	0	0
941	45061	NR_002979_at	45060	-11.3111	-2.213	0.195648	0.215686	0	0
942	28085	NM_004104_at	28084	-11.3101	-1.90612	0.168533	0.266809	0	0
943	48925	XM_292512_at	48924	-11.3093	-1.86183	0.164629	0.275126	0	0
944	51684	XM_942869_at	51683	-11.3093	-1.86183	0.164629	0.275126	0	0
945	6404	4081156_at	6403	-11.3081	-2.71149	0.239782	0.152673	0	0
946	39405	NM_134427_at	39404	-11.2997	-1.81097	0.160267	0.284999	0	0
947	2354	4065165_at	2353	-11.2985	-2.68664	0.237787	0.155325	0	0
948	8039	4087528_at	8038	-11.2948	-2.45144	0.217041	0.182829	0	0
949	36685	NM_024667_at	36684	-11.2938	-1.73159	0.153322	0.301121	0	0
950	52188	XR_015152_at	52187	-11.2916	-1.64835	0.145981	0.319004	0	0
951	10466	4096746_at	10465	-11.2842	-3.37089	0.298725	0.0966632	0	0
952	14778	4113273_at	14777	-11.2756	-3.13766	0.27827	0.113624	0	0
953	2038	4063922_at	2037	-11.275	-3.14706	0.279117	0.112886	0	0
954	32557	NM_015134_at	32556	-11.2736	-1.85967	0.164958	0.27554	0	0
955	25716	NM_001543_at	25715	-11.2721	-1.65957	0.147228	0.316534	0	0
956	29028	NM_005115_at	29027	-11.2664	-1.60132	0.142132	0.329576	0	0
957	2339	4065102_at	2338	-11.2626	-3.40658	0.302467	0.0943014	0	0
958	37689	NM_032227_at	37688	-11.2538	-2.02104	0.179587	0.24638	0	0
959	25520	NM_001319_at	25519	-11.2496	-1.58788	0.14115	0.33266	0	0
960	4189	4072277_at	4188	-11.2495	-3.39629	0.301905	0.0949765	0	0
961	10021	4095082_at	10020	-11.248	-2.43647	0.216613	0.184735	0	0
962	19703	4132061_at	19702	-11.24	-3.31252	0.294709	0.100654	0	0
963	3575	4069896_at	3574	-11.2356	-2.80655	0.249791	0.142937	0	0
964	19297	4130512_at	19296	-11.2353	-3.40013	0.302628	0.0947238	0	0
965	12161	4103314_at	12160	-11.2338	-2.92655	0.260513	0.131528	0	0
966	17605	4124141_at	17604	-11.2263	-2.47431	0.220403	0.179953	0	0
967	7823	4086653_at	7822	-11.211	-3.55476	0.317077	0.0850966	0	0
968	17130	4122220_at	17129	-11.1997	-2.86319	0.255649	0.137434	0	0
969	9488	4093165_at	9487	-11.1972	-2.44891	0.218707	0.183149	0	0
970	26707	NM_002616_at	26706	-11.1968	-1.84924	0.165158	0.277539	0	0
971	14078	4110642_at	14077	-11.1951	-3.15479	0.2818	0.112283	0	0
972	15999	4117859_at	15998	-11.1918	-3.30399	0.295215	0.101251	0	0
973	25069	NM_001080420_at	25068	-11.1904	-1.58505	0.141644	0.333313	0	0
974	4794	4074742_at	4793	-11.1895	-1.77511	0.158641	0.292172	0	0
975	25201	NM_001080779_at	25200	-11.1723	-1.81088	0.162087	0.285016	0	0
976	16259	4118793_at	16258	-11.1711	-2.02234	0.181033	0.246158	0	0
977	6411	4081181_at	6410	-11.1689	-1.99276	0.178421	0.251259	0	0
978	29368	NM_005489_at	29367	-11.1619	-1.85053	0.16579	0.27729	0	0
979	9119	4091662_at	9118	-11.1612	-3.67394	0.329172	0.078349	0	0
980	29707	NM_005856_at	29706	-11.157	-2.03139	0.182072	0.24462	0	0
981	40227	NM_145232_at	40226	-11.1565	-1.65976	0.148772	0.316491	0	0
982	46784	XM_001129752_at	46783	-11.1525	-1.76215	0.158004	0.294809	0	0
983	46987	XM_001130272_at	46986	-11.1525	-1.76215	0.158004	0.294809	0	0
984	4439	4073288_at	4438	-11.1481	-1.64122	0.14722	0.320584	0	0
985	26442	NM_002339_at	26441	-11.1438	-2.00197	0.179649	0.249658	0	0
986	11388	4100281_at	11387	-11.1432	-2.92789	0.262751	0.131406	0	0
987	11933	4102360_at	11932	-11.1406	-3.93532	0.35324	0.0653658	0	0
988	15671	4116597_at	15670	-11.1371	-3.41191	0.306354	0.0939537	0	0
989	43956	NM_199442_at	43955	-11.1369	-1.66042	0.149091	0.316347	0	0
990	10884	4098357_at	10883	-11.136	-3.46579	0.311223	0.0905096	0	0
991	28574	NM_004624_at	28573	-11.1304	-2.4416	0.219363	0.18408	0	0
992	4148	4072127_at	4147	-11.1293	-2.7615	0.248128	0.147471	0	0
993	39541	NM_138444_at	39540	-11.1277	-1.62742	0.146249	0.323667	0	0
994	38109	NM_032840_at	38108	-11.1236	-1.59588	0.143468	0.330821	0	0
995	19332	4130647_at	19331	-11.1201	-3.06571	0.275691	0.119434	0	0
996	3986	4071532_at	3985	-11.1189	-2.56436	0.23063	0.169064	0	0
997	7200	4084193_at	7199	-11.117	-2.89642	0.260539	0.134305	0	0
998	17769	4124769_at	17768	-11.1118	-3.23019	0.290698	0.106565	0	0
999	27767	NM_003764_at	27766	-11.0992	-2.82373	0.254408	0.141245	0	0
1000	16113	4118276_at	16112	-11.0897	-1.81314	0.163498	0.284571	0	0
1001	1819	4063060_at	1818	-11.0872	-4.34413	0.391815	0.0492364	0	0
1002	9402	4092837_at	9401	-11.0857	-3.57535	0.322519	0.0838903	0	0
1003	9916	4094718_at	9915	-11.0802	-1.66762	0.150505	0.314772	0	0
1004	37818	NM_032402_at	37817	-11.0715	-1.6983	0.153394	0.308148	0	0
1005	18910	4129037_at	18909	-11.0668	-2.47357	0.223513	0.180045	0	0
1006	15649	4116512_at	15648	-11.0645	-2.3528	0.212645	0.195766	0	0
1007	24551	NM_001042423_at	24550	-11.0588	-2.0497	0.185346	0.241535	0	0
1008	43805	NM_199045_at	43804	-11.0559	-2.21173	0.20005	0.215875	0	0
1009	18389	4127141_at	18388	-11.0555	-1.74157	0.157529	0.299044	0	0
1010	14782	4113290_at	14781	-11.0536	-4.1819	0.37833	0.0550963	0	0
1011	36510	NM_024334_at	36509	-11.0516	-1.71715	0.155376	0.304148	0	0
1012	24018	NM_001034841_at	24017	-11.048	-2.05206	0.185741	0.24114	0	0
1013	2939	4067534_at	2938	-11.0473	-4.03308	0.365073	0.0610832	0	0
1014	39542	NM_138445_at	39541	-11.0465	-2.50289	0.226577	0.176423	0	0
1015	42265	NM_177414_at	42264	-11.046	-2.43546	0.220484	0.184864	0	0
1016	39811	NM_139159_at	39810	-11.0455	-1.58969	0.143921	0.332244	0	0
1017	2565	4066036_at	2564	-11.0436	-2.42686	0.219753	0.185969	0	0
1018	15866	4117363_at	15865	-11.0424	-3.17307	0.287355	0.110869	0	0
1019	10208	4095765_at	10207	-11.0405	-2.50571	0.226956	0.176078	0	0
1020	25869	NM_001728_at	25868	-11.0394	-1.69608	0.153639	0.308624	0	0
1021	9728	4093965_at	9727	-11.0368	-1.94636	0.176353	0.25947	0	0
1022	15281	4115131_at	15280	-11.0351	-2.05836	0.186528	0.240089	0	0
1023	18151	4126181_at	18150	-11.0333	-2.83333	0.256798	0.140309	0	0
1024	13793	4109497_at	13792	-11.0306	-1.79881	0.163075	0.287411	0	0
1025	10901	4098428_at	10900	-11.0303	-3.17804	0.288119	0.110488	0	0
1026	5021	4075606_at	5020	-11.0251	-2.97022	0.269404	0.127607	0	0
1027	2485	4065724_at	2484	-11.0239	-3.70752	0.336318	0.0765464	0	0
1028	32985	NM_015833_at	32984	-11.021	-1.8784	0.170438	0.271985	0	0
1029	20386	4134666_at	20385	-11.0176	-2.21311	0.200871	0.215669	0	0
1030	21424	NM_000690_at	21423	-11.0057	-2.42315	0.220172	0.186449	0	0
1031	23138	NM_001013253_at	23137	-10.9957	-2.09468	0.1905	0.23412	0	0
1032	38383	NM_033238_at	38382	-10.9921	-1.64368	0.149532	0.32004	0	0
1033	4041	4071727_at	4040	-10.9917	-3.7099	0.337519	0.0764204	0	0
1034	4731	4074476_at	4730	-10.9896	-2.92392	0.266063	0.131769	0	0
1035	9551	4093392_at	9550	-10.9875	-2.95167	0.268638	0.129258	0	0
1036	26700	NM_002609_at	26699	-10.9863	-1.78418	0.162401	0.29034	0	0
1037	2166	4064436_at	2165	-10.9861	-2.38361	0.216966	0.19163	0	0
1038	26132	NM_002003_at	26131	-10.9759	-1.7656	0.160862	0.294104	0	0
1039	3719	4070523_at	3718	-10.9753	-3.47598	0.316708	0.0898725	0	0
1040	20582	4135412_at	20581	-10.9712	-3.2456	0.295829	0.105433	0	0
1041	28616	NM_004669_at	28615	-10.9708	-1.76262	0.160666	0.294712	0	0
1042	31920	NM_014365_at	31919	-10.9672	-2.44615	0.223042	0.1835	0	0
1043	15669	4116592_at	15668	-10.9663	-3.21686	0.293342	0.107555	0	0
1044	33081	NM_015964_at	33080	-10.9658	-2.63703	0.240477	0.160758	0	0
1045	17402	4123283_at	17401	-10.9611	-2.21113	0.201724	0.215966	0	0
1046	38681	NM_052925_at	38680	-10.9572	-1.81744	0.165868	0.283723	0	0
1047	12568	4104867_at	12567	-10.9532	-4.19832	0.383296	0.0544728	0	0
1048	800	4059234_at	799	-10.9507	-3.2429	0.296135	0.105631	0	0
1049	13728	4109310_at	13727	-10.9473	-3.30724	0.302105	0.101023	0	0
1050	16412	4119377_at	16411	-10.9458	-3.40701	0.311263	0.0942734	0	0
1051	14257	4111342_at	14256	-10.9454	-3.60714	0.329558	0.082062	0	0
1052	6901	4083075_at	6900	-10.9418	-2.0961	0.191568	0.23389	0	0
1053	3672	4070336_at	3671	-10.9376	-2.87681	0.263021	0.136142	0	0
1054	28836	NM_004907_at	28835	-10.9368	-2.43432	0.22258	0.185011	0	0
1055	14340	4111619_at	14339	-10.9357	-2.67883	0.244963	0.156168	0	0
1056	5283	4076656_at	5282	-10.9356	-1.77572	0.162379	0.292049	0	0
1057	44180	NM_203383_at	44179	-10.9356	-1.67703	0.153356	0.312725	0	0
1058	15200	4114817_at	15199	-10.9293	-1.81134	0.165732	0.284926	0	0
1059	15201	4114818_at	15200	-10.9166	-3.13796	0.287448	0.113601	0	0
1060	27012	NM_002939_at	27011	-10.9121	-1.6938	0.155223	0.309111	0	0
1061	38335	NM_033161_at	38334	-10.9071	-1.79392	0.164472	0.288388	0	0
1062	2333	4065074_at	2332	-10.9054	-4.41418	0.40477	0.0469028	0	0
1063	8783	4090412_at	8782	-10.9024	-3.00751	0.275859	0.124351	0	0
1064	728	4059006_at	727	-10.8999	-2.1352	0.195892	0.227636	0	0
1065	881	4059565_at	880	-10.8989	-1.68952	0.155018	0.310029	0	0
1066	10037	4095140_at	10036	-10.8901	-3.48621	0.320125	0.0892375	0	0
1067	37439	NM_031471_at	37438	-10.8888	-2.10425	0.193249	0.232572	0	0
1068	42462	NM_178443_at	42461	-10.8888	-2.10425	0.193249	0.232572	0	0
1069	23951	NM_001033551_at	23950	-10.8875	-1.82653	0.167765	0.281941	0	0
1070	9363	4092693_at	9362	-10.8745	-3.01615	0.277359	0.123608	0	0
1071	7168	4084077_at	7167	-10.8692	-2.42855	0.223435	0.185751	0	0
1072	8836	4090653_at	8835	-10.8589	-3.18967	0.293738	0.109601	0	0
1073	33376	NM_016332_at	33375	-10.8561	-1.90422	0.175406	0.267161	0	0
1074	7998	4087371_at	7997	-10.8451	-3.5442	0.326801	0.0857215	0	0
1075	4750	4074569_at	4749	-10.8369	-1.99821	0.184388	0.250311	0	0
1076	18961	4129199_at	18960	-10.8347	-2.61664	0.241505	0.163047	0	0
1077	24550	NM_001042422_at	24549	-10.8306	-1.74528	0.161143	0.298277	0	0
1078	10955	4098614_at	10954	-10.8208	-2.45857	0.227207	0.181927	0	0
1079	12611	4105074_at	12610	-10.819	-2.10218	0.194304	0.232906	0	0
1080	27828	NM_003827_at	27827	-10.8137	-1.80992	0.167372	0.285208	0	0
1081	528	4058245_at	527	-10.8052	-2.8039	0.259494	0.1432	0	0
1082	18058	4125799_at	18057	-10.8016	-2.40638	0.22278	0.188629	0	0
1083	11498	4100690_at	11497	-10.8011	-2.89337	0.267877	0.134589	0	0
1084	6676	4082233_at	6675	-10.8008	-1.94307	0.1799	0.260063	0	0
1085	19587	4131637_at	19586	-10.792	-1.92733	0.178589	0.262915	0	0
1086	15719	4116832_at	15718	-10.7875	-3.90597	0.362082	0.0667094	0	0
1087	5019	4075596_at	5018	-10.7854	-1.97582	0.183195	0.254225	0	0
1088	45091	NR_003023_at	45090	-10.7817	-2.00139	0.185628	0.249759	0	0
1089	13211	4107259_at	13210	-10.7811	-2.94627	0.27328	0.129743	0	0
1090	46836	XM_001129857_at	46835	-10.772	-1.60222	0.14874	0.329369	0	0
1091	45081	NR_003006_at	45080	-10.7618	-2.21842	0.206138	0.214876	0	0
1092	29204	NM_005308_at	29203	-10.7596	-2.17305	0.201964	0.221741	0	0
1093	27407	NM_003377_at	27406	-10.7595	-1.8789	0.174628	0.271891	0	0
1094	10526	4097000_at	10525	-10.7572	-1.76908	0.164455	0.293397	0	0
1095	51225	XM_940486_at	51224	-10.752	-2.2555	0.209774	0.209424	0	0
1096	3977	4071507_at	3976	-10.7492	-1.82478	0.169759	0.282285	0	0
1097	13803	4109540_at	13802	-10.7479	-1.60427	0.149263	0.328903	0	0
1098	14496	4112201_at	14495	-10.7471	-2.9317	0.272791	0.13106	0	0
1099	21505	NM_000784_at	21504	-10.7463	-2.62565	0.244331	0.162032	0	0
1100	42946	NM_182547_at	42945	-10.7453	-1.63994	0.152619	0.320869	0	0
1101	7515	4085470_at	7514	-10.7423	-2.58389	0.240534	0.166791	0	0
1102	5325	4076807_at	5324	-10.7346	-2.05059	0.191026	0.241385	0	0
1103	19584	4131630_at	19583	-10.7239	-2.98342	0.278202	0.126445	0	0
1104	12709	4105385_at	12708	-10.7236	-3.00872	0.28057	0.124247	0	0
1105	36786	NM_024787_at	36785	-10.7179	-2.17853	0.203261	0.2209	0	0
1106	15283	4115140_at	15282	-10.7139	-2.35775	0.220066	0.195095	0	0
1107	6141	4080162_at	6140	-10.7043	-2.78947	0.260592	0.144639	0	0
1108	46462	XM_001128909_at	46461	-10.7041	-2.48607	0.232254	0.178492	0	0
1109	3913	4071265_at	3912	-10.7016	-3.38268	0.316092	0.0958766	0	0
1110	9379	4092749_at	9378	-10.7008	-1.63866	0.153134	0.321155	0	0
1111	15037	4114165_at	15036	-10.6993	-2.98792	0.279263	0.126051	0	0
1112	7620	4085918_at	7619	-10.6991	-2.44288	0.228327	0.183916	0	0
1113	48178	XM_001133189_at	48177	-10.6977	-2.12723	0.198849	0.228897	0	0
1114	4930	4075229_at	4929	-10.6888	-3.17127	0.296689	0.111008	0	0
1115	30301	NM_006500_at	30300	-10.6788	-1.87787	0.175849	0.272086	0	0
1116	6113	4080042_at	6112	-10.6774	-3.1219	0.292383	0.114872	0	0
1117	16144	4118366_at	16143	-10.6764	-2.82825	0.264907	0.140803	0	0
1118	14959	4113884_at	14958	-10.676	-2.67478	0.250541	0.156607	0	0
1119	17530	4123782_at	17529	-10.665	-4.13171	0.387407	0.0570466	0	0
1120	16933	4121415_at	16932	-10.6613	-2.88687	0.27078	0.135196	0	0
1121	10429	4096598_at	10428	-10.659	-3.22413	0.302478	0.107014	0	0
1122	7053	4083613_at	7052	-10.6528	-2.35396	0.22097	0.195608	0	0
1123	17508	4123716_at	17507	-10.6493	-3.98249	0.373969	0.063263	0	0
1124	10712	4097697_at	10711	-10.6433	-2.44835	0.230037	0.183221	0	0
1125	13371	4107881_at	13370	-10.6431	-2.28119	0.214334	0.205728	0	0
1126	51497	XM_941774_at	51496	-10.6424	-1.87433	0.176119	0.272754	0	0
1127	29391	NM_005512_at	29390	-10.6423	-2.55481	0.240062	0.170187	0	0
1128	22095	NM_001003941_at	22094	-10.6375	-1.89421	0.178068	0.269021	0	0
1129	16912	4121344_at	16911	-10.6357	-1.67257	0.157261	0.313694	0	0
1130	29418	NM_005539_at	29417	-10.6353	-2.09751	0.197222	0.233661	0	0
1131	19545	4131465_at	19544	-10.6308	-1.90251	0.178962	0.267478	0	0
1132	32986	NM_015834_at	32985	-10.6213	-1.83385	0.172658	0.280515	0	0
1133	22761	NM_001008699_at	22760	-10.6198	-2.17809	0.205098	0.220968	0	0
1134	3635	4070196_at	3634	-10.6159	-1.87886	0.176986	0.271899	0	0
1135	23139	NM_001013254_at	23138	-10.5999	-2.01343	0.189947	0.247684	0	0
1136	17231	4122579_at	17230	-10.595	-2.72822	0.2575	0.150912	0	0
1137	15687	4116685_at	15686	-10.5927	-3.03629	0.28664	0.121895	0	0
1138	11757	4101656_at	11756	-10.5922	-2.04716	0.193271	0.24196	0	0
1139	16524	4119747_at	16523	-10.5896	-3.10317	0.293039	0.116373	0	0
1140	23918	NM_001033049_at	23917	-10.5846	-1.81431	0.171411	0.28434	0	0
1141	18951	4129171_at	18950	-10.5839	-3.46813	0.327681	0.0903626	0	0
1142	46421	XM_001128810_at	46420	-10.5823	-1.80854	0.170902	0.28548	0	0
1143	46803	XM_001129784_at	46802	-10.5823	-1.80854	0.170902	0.28548	0	0
1144	25290	NM_001082968_at	25289	-10.5819	-1.87278	0.176979	0.273047	0	0
1145	21395	NM_000660_at	21394	-10.5788	-2.36161	0.223239	0.194574	0	0
1146	15749	4116967_at	15748	-10.5752	-2.63173	0.248857	0.161351	0	0
1147	964	4059826_at	963	-10.5651	-1.74296	0.164974	0.298756	0	0
1148	6881	4082986_at	6880	-10.562	-3.03141	0.287011	0.122308	0	0
1149	35637	NM_021168_at	35636	-10.5517	-1.65443	0.156792	0.317664	0	0
1150	11800	4101799_at	11799	-10.5434	-1.80858	0.171537	0.285472	0	0
1151	37036	NM_025201_at	37035	-10.5405	-1.64207	0.155787	0.320396	0	0
1152	21127	NM_000361_at	21126	-10.5376	-2.35026	0.223037	0.196111	0	0
1153	30776	NM_007024_at	30775	-10.5333	-1.63178	0.154916	0.322691	0	0
1154	17428	4123388_at	17427	-10.523	-2.33367	0.221769	0.198379	0	0
1155	11006	4098834_at	11005	-10.5199	-2.95502	0.280899	0.128958	0	0
1156	18690	4128259_at	18689	-10.5199	-2.42842	0.230841	0.185769	0	0
1157	36091	NM_022463_at	36090	-10.5118	-1.80518	0.171729	0.286146	0	0
1158	7695	4086172_at	7694	-10.5068	-2.093	0.199203	0.234393	0	0
1159	817	4059286_at	816	-10.5023	-1.9983	0.190273	0.250295	0	0
1160	14981	4113957_at	14980	-10.4994	-2.65281	0.252664	0.15901	0	0
1161	21000	NM_000229_at	20999	-10.4989	-1.69945	0.16187	0.307904	0	0
1162	27645	NM_003636_at	27644	-10.4972	-1.82955	0.174289	0.281352	0	0
1163	25810	NM_001667_at	25809	-10.4885	-1.60172	0.152713	0.329484	0	0
1164	13126	4106979_at	13125	-10.4881	-2.71232	0.258609	0.152584	0	0
1165	5130	4076018_at	5129	-10.4877	-2.74032	0.261289	0.149652	0	0
1166	11542	4100870_at	11541	-10.4829	-2.07367	0.197815	0.237554	0	0
1167	32226	NM_014734_at	32225	-10.4818	-1.62507	0.155037	0.324194	0	0
1168	17675	4124404_at	17674	-10.4811	-3.77903	0.360558	0.072845	0	0
1169	6976	4083358_at	6975	-10.4774	-2.2922	0.218776	0.204164	0	0
1170	12713	4105398_at	12712	-10.4762	-2.97362	0.283845	0.127306	0	0
1171	1433	4061618_at	1432	-10.4721	-1.69692	0.162043	0.308444	0	0
1172	3830	4070926_at	3829	-10.4689	-4.59847	0.43925	0.0412784	0	0
1173	7732	4086309_at	7731	-10.4648	-3.43422	0.328169	0.0925116	0	0
1174	20049	4133278_at	20048	-10.4641	-4.24694	0.405857	0.0526674	0	0
1175	4607	4073988_at	4606	-10.4532	-3.51645	0.336398	0.087386	0	0
1176	27368	NM_003335_at	27367	-10.4524	-1.84544	0.176557	0.278271	0	0
1177	8136	4087920_at	8135	-10.4503	-2.59196	0.248028	0.16586	0	0
1178	29773	NM_005928_at	29772	-10.4467	-1.75159	0.167669	0.296973	0	0
1179	7244	4084338_at	7243	-10.4448	-2.90055	0.277702	0.133921	0	0
1180	21032	NM_000262_at	21031	-10.4441	-1.8596	0.178053	0.275552	0	0
1181	5174	4076200_at	5173	-10.4341	-1.70627	0.163528	0.306452	0	0
1182	8308	4088540_at	8307	-10.4256	-2.57938	0.247409	0.167313	0	0
1183	20892	NM_000118_at	20891	-10.4234	-1.90388	0.182654	0.267223	0	0
1184	20518	4135173_at	20517	-10.4229	-2.98885	0.286757	0.12597	0	0
1185	4662	4074219_at	4661	-10.4229	-3.10057	0.297476	0.116583	0	0
1186	28605	NM_004657_at	28604	-10.4205	-2.23479	0.214461	0.212452	0	0
1187	2245	4064780_at	2244	-10.4199	-3.26345	0.313193	0.104137	0	0
1188	982	4059911_at	981	-10.4156	-2.86561	0.275127	0.137204	0	0
1189	25618	NM_001430_at	25617	-10.4146	-2.85651	0.274281	0.138071	0	0
1190	20782	4136199_at	20781	-10.4102	-2.10654	0.202355	0.232203	0	0
1191	33104	NM_015991_at	33103	-10.4071	-2.66752	0.256316	0.157397	0	0
1192	26339	NM_002221_at	26338	-10.4062	-1.59585	0.153356	0.330827	0	0
1193	28783	NM_004851_at	28782	-10.4	-3.48925	0.335506	0.0890495	0	0
1194	53127	XR_016245_at	53126	-10.3919	-2.73435	0.263122	0.150273	0	0
1195	30102	NM_006291_at	30101	-10.3913	-1.93891	0.186591	0.260813	0	0
1196	9946	4094837_at	9945	-10.39	-1.85537	0.178573	0.276361	0	0
1197	12866	4105988_at	12865	-10.3894	-2.67711	0.257677	0.156355	0	0
1198	17878	4125170_at	17877	-10.3845	-3.56301	0.343108	0.0846111	0	0
1199	5754	4078598_at	5753	-10.3843	-2.16421	0.208412	0.223105	0	0
1200	11022	4098931_at	11021	-10.3828	-1.67342	0.161172	0.313509	0	0
1201	17814	4124942_at	17813	-10.3821	-1.91542	0.184492	0.265096	0	0
1202	31464	NM_013258_at	31463	-10.3783	-1.94344	0.187261	0.259996	0	0
1203	16210	4118589_at	16209	-10.3771	-1.96764	0.189613	0.255671	0	0
1204	7792	4086528_at	7791	-10.3739	-2.31383	0.223043	0.201126	0	0
1205	11192	4099544_at	11191	-10.3719	-3.91985	0.377931	0.0660704	0	0
1206	9996	4095006_at	9995	-10.3716	-2.14052	0.206384	0.226798	0	0
1207	9528	4093299_at	9527	-10.3684	-1.95858	0.188899	0.257281	0	0
1208	17222	4122545_at	17221	-10.3665	-4.19301	0.404478	0.0546738	0	0
1209	20087	4133421_at	20086	-10.3636	-3.81484	0.368099	0.0710588	0	0
1210	44182	NM_203385_at	44181	-10.3578	-1.63479	0.157833	0.322017	0	0
1211	40205	NM_145182_at	40204	-10.3575	-1.94873	0.188146	0.259043	0	0
1212	6528	4081591_at	6527	-10.3553	-2.25867	0.218117	0.208965	0	0
1213	10098	4095353_at	10097	-10.3543	-2.763	0.266846	0.147318	0	0
1214	7709	4086233_at	7708	-10.3532	-1.72097	0.166225	0.303344	0	0
1215	41550	NM_172130_at	41549	-10.3499	-1.78763	0.17272	0.289648	0	0
1216	10205	4095760_at	10204	-10.3443	-3.18008	0.307425	0.110331	0	0
1217	16309	4118976_at	16308	-10.3437	-1.66925	0.161378	0.314418	0	0
1218	45547	XM_001126477_at	45546	-10.3435	-1.71167	0.165482	0.305307	0	0
1219	20750	4136092_at	20749	-10.3412	-3.2531	0.314578	0.104886	0	0
1220	9370	4092722_at	9369	-10.337	-3.16285	0.305974	0.111658	0	0
1221	32217	NM_014725_at	32216	-10.3356	-1.65478	0.160105	0.317586	0	0
1222	34588	NM_018641_at	34587	-10.3352	-1.91556	0.185344	0.265068	0	0
1223	27735	NM_003731_at	27734	-10.3336	-2.00025	0.193567	0.249956	0	0
1224	23635	NM_001025160_at	23634	-10.3331	-1.90985	0.184828	0.266121	0	0
1225	38896	NM_078481_at	38895	-10.3331	-1.90985	0.184828	0.266121	0	0
1226	6543	4081625_at	6542	-10.3301	-3.24473	0.314105	0.105496	0	0
1227	27689	NM_003681_at	27688	-10.3299	-1.74626	0.169049	0.298073	0	0
1228	8180	4088074_at	8179	-10.3056	-3.05664	0.296599	0.120187	0	0
1229	15710	4116792_at	15709	-10.3055	-2.3204	0.225162	0.200212	0	0
1230	35821	NM_021902_at	35820	-10.3003	-2.17452	0.211113	0.221515	0	0
1231	17664	4124365_at	17663	-10.2982	-1.94406	0.188776	0.259884	0	0
1232	37248	NM_030915_at	37247	-10.2904	-1.84562	0.179353	0.278236	0	0
1233	6461	4081378_at	6460	-10.2795	-3.62877	0.35301	0.0808412	0	0
1234	167	4056904_at	166	-10.2792	-1.77768	0.17294	0.291651	0	0
1235	14269	4111366_at	14268	-10.2773	-2.73333	0.265959	0.150378	0	0
1236	1220	4060736_at	1219	-10.2674	-1.69621	0.165203	0.308596	0	0
1237	5901	4079197_at	5900	-10.2627	-3.1239	0.304394	0.114713	0	0
1238	42119	NM_175709_at	42118	-10.2588	-1.60601	0.156549	0.328507	0	0
1239	17578	4123986_at	17577	-10.2524	-2.96107	0.288818	0.128419	0	0
1240	15292	4115203_at	15291	-10.2519	-2.61772	0.25534	0.162925	0	0
1241	13903	4109925_at	13902	-10.2386	-3.19479	0.312033	0.109213	0	0
1242	8829	4090625_at	8828	-10.2352	-1.90751	0.186368	0.266553	0	0
1243	12595	4105004_at	12594	-10.2335	-2.69603	0.263451	0.154317	0	0
1244	39859	NM_139265_at	39858	-10.2216	-1.68964	0.1653	0.310004	0	0
1245	23222	NM_001013723_at	23221	-10.221	-2.05175	0.200739	0.241191	0	0
1246	5671	4078224_at	5670	-10.2167	-2.1222	0.207719	0.229696	0	0
1247	30973	NM_007256_at	30972	-10.2135	-2.42097	0.237036	0.18673	0	0
1248	16329	4119041_at	16328	-10.2124	-1.89475	0.185535	0.26892	0	0
1249	14789	4113323_at	14788	-10.2081	-3.60141	0.352799	0.082389	0	0
1250	6193	4080385_at	6192	-10.1984	-2.67552	0.262347	0.156527	0	0
1251	44181	NM_203384_at	44180	-10.1937	-1.60271	0.157225	0.329259	0	0
1252	20323	4134418_at	20322	-10.191	-2.32651	0.228291	0.199366	0	0
1253	42076	NM_175060_at	42075	-10.1908	-2.0867	0.204763	0.235419	0	0
1254	3272	4068779_at	3271	-10.1887	-3.09158	0.30343	0.117312	0	0
1255	17633	4124256_at	17632	-10.1877	-2.63054	0.258206	0.161484	0	0
1256	11025	4098944_at	11024	-10.1874	-2.11174	0.20729	0.231368	0	0
1257	6818	4082761_at	6817	-10.1852	-3.03299	0.297783	0.122174	0	0
1258	9561	4093422_at	9560	-10.1846	-1.78682	0.175444	0.289809	0	0
1259	8852	4090704_at	8851	-10.1833	-2.61118	0.256418	0.163666	0	0
1260	37872	NM_032470_at	37871	-10.1771	-2.05332	0.201759	0.24093	0	0
1261	1460	4061709_at	1459	-10.1723	-3.10713	0.30545	0.116054	0	0
1262	17271	4122718_at	17270	-10.1665	-2.48372	0.244305	0.178782	0	0
1263	4244	4072485_at	4243	-10.1636	-1.76763	0.173918	0.293691	0	0
1264	110	4056636_at	109	-10.1628	-2.12265	0.208865	0.229625	0	0
1265	29100	NM_005194_at	29099	-10.158	-1.6173	0.159215	0.325944	0	0
1266	10258	4095962_at	10257	-10.1571	-3.9623	0.3901	0.0641547	0	0
1267	18659	4128139_at	18658	-10.1568	-2.85415	0.281008	0.138298	0	0
1268	26720	NM_002630_at	26719	-10.156	-3.09586	0.304831	0.116964	0	0
1269	146	4056810_at	145	-10.1534	-1.67684	0.16515	0.312768	0	0
1270	11477	4100617_at	11476	-10.1526	-3.3559	0.330547	0.0976727	0	0
1271	51053	XM_939664_at	51052	-10.1509	-1.9085	0.188013	0.26637	0	0
1272	5248	4076510_at	5247	-10.1493	-3.24008	0.319242	0.105838	0	0
1273	4815	4074841_at	4814	-10.1463	-2.63231	0.259436	0.161286	0	0
1274	9601	4093573_at	9600	-10.141	-2.9146	0.287408	0.132623	0	0
1275	18543	4127739_at	18542	-10.1381	-3.57612	0.35274	0.0838455	0	0
1276	39401	NM_134421_at	39400	-10.1379	-1.86253	0.183719	0.274994	0	0
1277	26317	NM_002198_at	26316	-10.1377	-2.40685	0.237415	0.188568	0	0
1278	49354	XM_496973_at	49353	-10.1373	-2.1707	0.21413	0.222103	0	0
1279	41017	NM_152830_at	41016	-10.1371	-2.18395	0.215441	0.220072	0	0
1280	3732	4070570_at	3731	-10.1345	-3.28045	0.323691	0.102916	0	0
1281	1603	4062219_at	1602	-10.133	-2.30401	0.227378	0.202499	0	0
1282	17316	4122911_at	17315	-10.1319	-2.14727	0.211931	0.225739	0	0
1283	10949	4098601_at	10948	-10.1319	-3.00943	0.297025	0.124186	0	0
1284	36470	NM_024164_at	36469	-10.1313	-2.99101	0.295225	0.125782	0	0
1285	3864	4071090_at	3863	-10.1204	-1.64804	0.162843	0.319073	0	0
1286	12841	4105873_at	12840	-10.1196	-2.04868	0.202446	0.241705	0	0
1287	13942	4110081_at	13941	-10.1151	-3.61798	0.357681	0.0814476	0	0
1288	1868	4063259_at	1867	-10.1031	-3.46185	0.342652	0.0907571	0	0
1289	26699	NM_002608_at	26698	-10.1022	-1.84571	0.182704	0.278219	0	0
1290	18744	4128440_at	18743	-10.0998	-2.99507	0.296547	0.125428	0	0
1291	13143	4107045_at	13142	-10.0992	-2.16991	0.214859	0.222224	0	0
1292	25418	NM_001206_at	25417	-10.0972	-1.85939	0.18415	0.275592	0	0
1293	4718	4074423_at	4717	-10.0966	-2.96119	0.293287	0.128409	0	0
1294	19674	4131962_at	19673	-10.0927	-2.05512	0.203625	0.240629	0	0
1295	14649	4112794_at	14648	-10.0868	-2.39487	0.237427	0.19014	0	0
1296	10105	4095381_at	10104	-10.0768	-2.72598	0.270522	0.151147	0	0
1297	50327	XM_935188_at	50326	-10.0758	-1.66996	0.16574	0.314263	0	0
1298	8768	4090359_at	8767	-10.0735	-3.12401	0.310122	0.114704	0	0
1299	12968	4106349_at	12967	-10.0727	-3.3077	0.328384	0.100991	0	0
1300	480	4058059_at	479	-10.0677	-3.6395	0.361502	0.0802421	0	0
1301	4138	4072103_at	4137	-10.067	-1.84855	0.183625	0.277671	0	0
1302	3974	4071500_at	3973	-10.065	-1.75012	0.173883	0.297276	0	0
1303	2836	4067134_at	2835	-10.0629	-2.62916	0.261272	0.161638	0	0
1304	13673	4109070_at	13672	-10.06	-2.15493	0.214208	0.224544	0	0
1305	38097	NM_032827_at	38096	-10.0471	-1.72651	0.171842	0.302182	0	0
1306	12512	4104646_at	12511	-10.0448	-3.37037	0.335536	0.0966979	0	0
1307	10534	4097030_at	10533	-10.041	-3.16186	0.314895	0.111734	0	0
1308	3225	4068575_at	3224	-10.04	-2.19307	0.218433	0.218685	0	0
1309	16959	4121527_at	16958	-10.0387	-3.01434	0.300272	0.123764	0	0
1310	72	4056490_at	71	-10.0336	-1.81464	0.180857	0.284274	0	0
1311	8547	4089566_at	8546	-10.0325	-1.67873	0.167329	0.312357	0	0
1312	17241	4122612_at	17240	-10.0298	-2.83655	0.282811	0.139995	0	0
1313	16993	4121683_at	16992	-10.0276	-3.2235	0.321462	0.107061	0	0
1314	16698	4120481_at	16697	-10.0239	-2.40536	0.239962	0.188762	0	0
1315	19065	4129603_at	19064	-10.0213	-2.64438	0.263876	0.159941	0	0
1316	20465	4134987_at	20464	-10.0159	-1.82193	0.181904	0.282842	0	0
1317	12298	4103878_at	12297	-10.0144	-2.64778	0.264397	0.159565	0	0
1318	25959	NM_001823_at	25958	-10.0076	-1.85686	0.185544	0.276077	0	0
1319	3166	4068350_at	3165	-10.0048	-2.87287	0.28715	0.136515	0	0
1320	6492	4081470_at	6491	-9.99973	-4.40157	0.440169	0.0473147	0	0
1321	29601	NM_005736_at	29600	-9.99899	-1.63638	0.163654	0.321663	0	0
1322	41583	NM_172210_at	41582	-9.99824	-2.13403	0.21344	0.227821	0	0
1323	28088	NM_004107_at	28087	-9.99602	-1.82102	0.182174	0.283021	0	0
1324	29154	NM_005252_at	29153	-9.9956	-3.12363	0.312501	0.114734	0	0
1325	41584	NM_172211_at	41583	-9.99155	-2.23045	0.223234	0.213092	0	0
1326	17273	4122720_at	17272	-9.98962	-2.62191	0.262463	0.162453	0	0
1327	3914	4071268_at	3913	-9.98932	-2.91744	0.292056	0.132362	0	0
1328	28425	NM_004469_at	28424	-9.98807	-3.69865	0.370307	0.0770187	0	0
1329	4046	4071744_at	4045	-9.98766	-3.11035	0.311419	0.115796	0	0
1330	6289	4080749_at	6288	-9.98643	-2.11274	0.211561	0.231207	0	0
1331	32253	NM_014762_at	32252	-9.98026	-1.78615	0.178968	0.289946	0	0
1332	6731	4082454_at	6730	-9.97885	-1.67832	0.168188	0.312445	0	0
1333	4191	4072282_at	4190	-9.97624	-2.82319	0.282991	0.141298	0	0
1334	38933	NM_080430_at	38932	-9.97149	-1.68945	0.169428	0.310044	0	0
1335	39173	NM_130468_at	39172	-9.97057	-2.0474	0.205344	0.24192	0	0
1336	5575	4077799_at	5574	-9.96873	-1.82503	0.183076	0.282235	0	0
1337	9721	4093955_at	9720	-9.96865	-2.89965	0.290877	0.134004	0	0
1338	16340	4119086_at	16339	-9.96308	-3.30784	0.33201	0.100981	0	0
1339	7003	4083444_at	7002	-9.95904	-2.99524	0.300756	0.125413	0	0
1340	16448	4119496_at	16447	-9.95726	-1.96767	0.197611	0.255666	0	0
1341	11456	4100537_at	11455	-9.95503	-2.0341	0.204329	0.244159	0	0
1342	45107	NR_003051_at	45106	-9.9535	-2.25613	0.226667	0.209332	0	0
1343	4190	4072279_at	4189	-9.95248	-3.3663	0.338237	0.0969714	0	0
1344	18979	4129260_at	18978	-9.94464	-2.89938	0.291552	0.13403	0	0
1345	19569	4131594_at	19568	-9.94257	-1.93221	0.194337	0.262027	0	0
1346	43403	NM_198098_at	43402	-9.94229	-3.82613	0.384834	0.0705049	0	0
1347	46486	XM_001128963_at	46485	-9.94179	-1.90734	0.19185	0.266584	0	0
1348	50043	XM_931497_at	50042	-9.94179	-1.90734	0.19185	0.266584	0	0
1349	631	4058591_at	630	-9.93804	-3.56695	0.358919	0.0843801	0	0
1350	41210	NM_153284_at	41209	-9.93383	-1.71162	0.172302	0.305316	0	0
1351	26286	NM_002165_at	26285	-9.93277	-2.57421	0.259163	0.167914	0	0
1352	16578	4119979_at	16577	-9.92923	-3.04414	0.306584	0.121233	0	0
1353	16283	4118889_at	16282	-9.92896	-2.80739	0.282748	0.142853	0	0
1354	5	4056242_at	4	-9.92681	-3.27398	0.329811	0.10338	0	0
1355	8534	4089513_at	8533	-9.92363	-2.20578	0.222275	0.216768	0	0
1356	1147	4060495_at	1146	-9.92315	-3.71045	0.373919	0.0763911	0	0
1357	41811	NM_173542_at	41810	-9.92237	-1.60367	0.161622	0.329039	0	0
1358	1422	4061563_at	1421	-9.92158	-2.05354	0.206978	0.240892	0	0
1359	8761	4090323_at	8760	-9.92035	-2.27729	0.229558	0.206284	0	0
1360	25924	NM_001784_at	25923	-9.91729	-1.83776	0.185309	0.279755	0	0
1361	13652	4108986_at	13651	-9.91617	-2.62156	0.264372	0.162492	0	0
1362	44731	NR_001284_at	44730	-9.90987	-2.16554	0.218523	0.222899	0	0
1363	10695	4097635_at	10694	-9.90638	-2.02644	0.204559	0.24546	0	0
1364	19692	4132028_at	19691	-9.90116	-1.62719	0.164343	0.323718	0	0
1365	2037	4063919_at	2036	-9.90095	-1.69108	0.1708	0.309694	0	0
1366	12812	4105767_at	12811	-9.89823	-2.40787	0.243263	0.188433	0	0
1367	26502	NM_002404_at	26501	-9.89558	-3.20801	0.324186	0.108216	0	0
1368	18328	4126870_at	18327	-9.8916	-3.18084	0.32157	0.110274	0	0
1369	8046	4087552_at	8045	-9.88979	-2.39237	0.241903	0.190469	0	0
1370	93	4056565_at	92	-9.88804	-3.12643	0.316183	0.114512	0	0
1371	11141	4099330_at	11140	-9.88635	-2.58608	0.261581	0.166537	0	0
1372	4237	4072452_at	4236	-9.884	-2.38372	0.24117	0.191614	0	0
1373	7424	4085082_at	7423	-9.88227	-4.35714	0.440905	0.0487943	0	0
1374	8172	4088044_at	8171	-9.8734	-1.976	0.200134	0.254194	0	0
1375	1945	4063558_at	1944	-9.87137	-2.47815	0.251045	0.179474	0	0
1376	11825	4101908_at	11824	-9.86967	-2.0189	0.204556	0.246746	0	0
1377	13442	4108149_at	13441	-9.86884	-1.71472	0.17375	0.304663	0	0
1378	11178	4099495_at	11177	-9.86655	-3.10654	0.314856	0.116102	0	0
1379	40819	NM_152547_at	40818	-9.86419	-1.70871	0.173223	0.305934	0	0
1380	25536	NM_001336_at	25535	-9.85978	-1.67006	0.169381	0.314241	0	0
1381	13086	4106814_at	13085	-9.85892	-1.75433	0.177944	0.29641	0	0
1382	26566	NM_002473_at	26565	-9.8455	-1.71148	0.173834	0.305346	0	0
1383	11346	4100120_at	11345	-9.83553	-3.80402	0.386763	0.0715936	0	0
1384	18217	4126421_at	18216	-9.83059	-2.00212	0.203662	0.249634	0	0
1385	13115	4106913_at	13114	-9.82771	-2.1011	0.213794	0.23308	0	0
1386	5243	4076490_at	5242	-9.82172	-3.74449	0.381246	0.0746099	0	0
1387	1307	4061094_at	1306	-9.82121	-2.49374	0.253913	0.177546	0	0
1388	20052	4133288_at	20051	-9.82076	-3.25051	0.330984	0.105075	0	0
1389	17871	4125146_at	17870	-9.82065	-3.63169	0.369801	0.0806775	0	0
1390	15361	4115466_at	15360	-9.8205	-2.87233	0.292483	0.136566	0	0
1391	13634	4108925_at	13633	-9.81897	-2.9277	0.298168	0.131424	0	0
1392	13632	4108917_at	13631	-9.81885	-1.95161	0.198762	0.258527	0	0
1393	14254	4111337_at	14253	-9.81736	-3.25478	0.331533	0.104765	0	0
1394	14158	4110954_at	14157	-9.81547	-1.72176	0.175413	0.303178	0	0
1395	11285	4099906_at	11284	-9.8141	-1.77458	0.18082	0.292279	0	0
1396	10737	4097800_at	10736	-9.81186	-2.54424	0.259303	0.171438	0	0
1397	29150	NM_005248_at	29149	-9.80775	-1.86044	0.189691	0.275391	0	0
1398	27220	NM_003164_at	27219	-9.80357	-1.83501	0.187178	0.280289	0	0
1399	46727	XM_001129594_at	46726	-9.80172	-2.14132	0.218464	0.226672	0	0
1400	46846	XM_001129889_at	46845	-9.80172	-2.14132	0.218464	0.226672	0	0
1401	12389	4104222_at	12388	-9.79424	-2.02462	0.206715	0.24577	0	0
1402	5857	4078988_at	5856	-9.792	-1.82011	0.185878	0.283198	0	0
1403	45605	XM_001126665_at	45604	-9.78586	-2.39046	0.244277	0.190722	0	0
1404	2367	4065214_at	2366	-9.78242	-2.41548	0.246921	0.187442	0	0
1405	10260	4095964_at	10259	-9.77287	-2.57894	0.263887	0.167364	0	0
1406	15978	4117778_at	15977	-9.77171	-2.64777	0.270962	0.159567	0	0
1407	30547	NM_006770_at	30546	-9.77143	-1.86852	0.191222	0.273855	0	0
1408	42633	NM_181353_at	42632	-9.76789	-2.39594	0.245287	0.189999	0	0
1409	50224	XM_933555_at	50223	-9.76214	-2.15179	0.220422	0.225034	0	0
1410	51964	XM_944644_at	51963	-9.76214	-2.15179	0.220422	0.225034	0	0
1411	17621	4124202_at	17620	-9.76182	-3.37421	0.345654	0.0964408	0	0
1412	26634	NM_002541_at	26633	-9.75747	-1.72859	0.177155	0.301748	0	0
1413	3151	4068309_at	3150	-9.75583	-1.61016	0.165046	0.327561	0	0
1414	12442	4104409_at	12441	-9.75174	-2.46416	0.252689	0.181224	0	0
1415	17708	4124524_at	17707	-9.74515	-2.05249	0.210617	0.241068	0	0
1416	33228	NM_016140_at	33227	-9.7358	-2.27753	0.233934	0.206251	0	0
1417	27185	NM_003123_at	27184	-9.73487	-1.85862	0.190924	0.27574	0	0
1418	7744	4086355_at	7743	-9.72842	-3.08482	0.317094	0.117863	0	0
1419	3825	4070898_at	3824	-9.72612	-1.70569	0.175372	0.306575	0	0
1420	4544	4073737_at	4543	-9.71997	-3.69224	0.379861	0.0773617	0	0
1421	10711	4097695_at	10710	-9.71957	-3.45779	0.355755	0.0910128	0	0
1422	16020	4117920_at	16019	-9.71812	-3.02237	0.311004	0.123077	0	0
1423	11490	4100650_at	11489	-9.7133	-2.49002	0.256352	0.178004	0	0
1424	49589	XM_927177_at	49588	-9.71238	-1.96829	0.202658	0.255555	0	0
1425	23822	NM_001031730_at	23821	-9.71107	-2.15423	0.221832	0.224653	0	0
1426	16617	4120153_at	16616	-9.71064	-1.6001	0.164778	0.329853	0	0
1427	26803	NM_002725_at	26802	-9.71009	-2.37769	0.244868	0.192418	0	0
1428	43997	NM_201348_at	43996	-9.71009	-2.37769	0.244868	0.192418	0	0
1429	17299	4122842_at	17298	-9.70024	-1.93068	0.199035	0.262305	0	0
1430	52120	XM_946019_at	52119	-9.69945	-1.91562	0.197498	0.265058	0	0
1431	6932	4083203_at	6931	-9.69693	-2.38984	0.246453	0.190804	0	0
1432	12431	4104361_at	12430	-9.69604	-3.5614	0.367304	0.0847058	0	0
1433	1314	4061120_at	1313	-9.69268	-2.53178	0.261205	0.172926	0	0
1434	25980	NM_001846_at	25979	-9.68882	-1.62625	0.167848	0.32393	0	0
1435	3520	4069708_at	3519	-9.68528	-3.26683	0.337299	0.103893	0	0
1436	9005	4091287_at	9004	-9.6839	-1.66645	0.172085	0.315027	0	0
1437	1690	4062578_at	1689	-9.68377	-2.79425	0.28855	0.14416	0	0
1438	11531	4100820_at	11530	-9.68165	-2.1168	0.21864	0.230558	0	0
1439	18616	4127994_at	18615	-9.68122	-2.69962	0.278852	0.153933	0	0
1440	727	4059005_at	726	-9.67192	-2.93969	0.303941	0.130336	0	0
1441	12862	4105965_at	12861	-9.66826	-2.01993	0.208924	0.24657	0	0
1442	19189	4130087_at	19188	-9.66553	-2.73968	0.283448	0.149718	0	0
1443	16905	4121314_at	16904	-9.65865	-1.91532	0.198301	0.265113	0	0
1444	21592	NM_000873_at	21591	-9.65582	-1.66765	0.172709	0.314766	0	0
1445	8575	4089674_at	8574	-9.64785	-1.9601	0.203164	0.257011	0	0
1446	10976	4098701_at	10975	-9.64763	-3.17903	0.329514	0.110412	0	0
1447	1751	4062794_at	1750	-9.64513	-3.351	0.347429	0.0980052	0	0
1448	16391	4119306_at	16390	-9.64274	-2.91669	0.302475	0.132431	0	0
1449	1500	4061848_at	1499	-9.63632	-3.56226	0.369671	0.0846548	0	0
1450	49922	XM_930178_at	49921	-9.6296	-1.68769	0.175261	0.310423	0	0
1451	50759	XM_938104_at	50758	-9.6296	-1.68769	0.175261	0.310423	0	0
1452	14807	4113383_at	14806	-9.62723	-3.87446	0.402448	0.0681823	0	0
1453	25888	NM_001747_at	25887	-9.62323	-1.88767	0.196158	0.270243	0	0
1454	44709	NR_000020_at	44708	-9.61949	-2.20657	0.229386	0.216648	0	0
1455	42261	NM_177401_at	42260	-9.61916	-1.64544	0.171059	0.319649	0	0
1456	25877	NM_001736_at	25876	-9.61553	-2.44323	0.254092	0.183872	0	0
1457	9788	4094174_at	9787	-9.61095	-1.72585	0.179571	0.30232	0	0
1458	12670	4105265_at	12669	-9.60703	-2.51702	0.261998	0.174703	0	0
1459	20783	4136214_at	20782	-9.60531	-2.70614	0.281733	0.15324	0	0
1460	51114	XM_939919_at	51113	-9.60084	-1.79972	0.187454	0.287231	0	0
1461	8563	4089618_at	8562	-9.60018	-2.53549	0.264109	0.172481	0	0
1462	1492	4061817_at	1491	-9.59853	-2.29447	0.239044	0.203843	0	0
1463	98	4056580_at	97	-9.59727	-2.52099	0.262678	0.174224	0	0
1464	20550	4135288_at	20549	-9.59416	-2.45652	0.256044	0.182185	0	0
1465	5941	4079368_at	5940	-9.59291	-2.56453	0.267335	0.169044	0	0
1466	4353	4072897_at	4352	-9.58926	-2.54729	0.265639	0.171077	0	0
1467	14438	4111991_at	14437	-9.58487	-1.78317	0.18604	0.290544	0	0
1468	15626	4116442_at	15625	-9.58301	-2.25983	0.235816	0.208797	0	0
1469	43490	NM_198282_at	43489	-9.58241	-1.99292	0.207977	0.251231	0	0
1470	24689	NM_001042729_at	24688	-9.55947	-1.83979	0.192457	0.279362	0	0
1471	12250	4103674_at	12249	-9.55802	-2.5769	0.269606	0.167601	0	0
1472	13319	4107661_at	13318	-9.55642	-1.68161	0.175967	0.311734	0	0
1473	3264	4068729_at	3263	-9.5382	-3.21285	0.33684	0.107854	0	0
1474	8263	4088367_at	8262	-9.53573	-2.0756	0.217665	0.237237	0	0
1475	21672	NM_000958_at	21671	-9.53283	-1.89114	0.198382	0.269594	0	0
1476	12687	4105309_at	12686	-9.53168	-1.94115	0.203653	0.260408	0	0
1477	11807	4101829_at	11806	-9.52993	-2.28196	0.239452	0.205618	0	0
1478	30287	NM_006485_at	30286	-9.52911	-1.95076	0.204715	0.258681	0	0
1479	11936	4102372_at	11935	-9.52773	-1.74712	0.183372	0.297895	0	0
1480	5698	4078351_at	5697	-9.52567	-2.47248	0.25956	0.180181	0	0
1481	11660	4101343_at	11659	-9.52375	-1.90947	0.200495	0.266191	0	0
1482	28325	NM_004364_at	28324	-9.52137	-1.68506	0.176977	0.310989	0	0
1483	30288	NM_006486_at	30287	-9.51746	-2.27358	0.238885	0.206816	0	0
1484	3455	4069464_at	3454	-9.51475	-3.49688	0.367522	0.0885799	0	0
1485	4228	4072402_at	4227	-9.5056	-2.12831	0.223901	0.228726	0	0
1486	15426	4115665_at	15425	-9.50137	-1.77698	0.187024	0.291793	0	0
1487	15185	4114755_at	15184	-9.49739	-2.97303	0.313036	0.127359	0	0
1488	26302	NM_002183_at	26301	-9.49415	-1.69467	0.178496	0.308925	0	0
1489	19828	4132523_at	19827	-9.49195	-3.66329	0.385937	0.0789295	0	0
1490	20176	4133767_at	20175	-9.4914	-1.91627	0.201895	0.264939	0	0
1491	10736	4097791_at	10735	-9.48838	-1.74693	0.184113	0.297935	0	0
1492	7280	4084484_at	7279	-9.48591	-4.42349	0.466322	0.0466013	0	0
1493	15407	4115582_at	15406	-9.48476	-2.10514	0.221949	0.232429	0	0
1494	20561	4135331_at	20560	-9.48281	-3.31891	0.349992	0.10021	0	0
1495	2216	4064653_at	2215	-9.47006	-2.74118	0.289457	0.149563	0	0
1496	14613	4112621_at	14612	-9.46852	-3.43677	0.362967	0.0923487	0	0
1497	8100	4087779_at	8099	-9.4681	-2.7324	0.28859	0.150476	0	0
1498	570	4058391_at	569	-9.46488	-3.59369	0.379687	0.0828306	0	0
1499	12723	4105431_at	12722	-9.46437	-2.11877	0.223868	0.230243	0	0
1500	13751	4109371_at	13750	-9.46221	-3.24808	0.343269	0.105252	0	0
1501	12741	4105489_at	12740	-9.46036	-2.85211	0.30148	0.138494	0	0
1502	34556	NM_018488_at	34555	-9.45773	-1.81539	0.191947	0.284128	0	0
1503	46386	XM_001128716_at	46385	-9.45539	-1.82306	0.192806	0.282622	0	0
1504	12852	4105927_at	12851	-9.45361	-3.02978	0.320489	0.122446	0	0
1505	9174	4091895_at	9173	-9.45233	-1.89503	0.200482	0.268869	0	0
1506	6877	4082982_at	6876	-9.43676	-2.72373	0.28863	0.151382	0	0
1507	12800	4105718_at	12799	-9.43458	-3.68596	0.390687	0.0776988	0	0
1508	6300	4080784_at	6299	-9.43397	-2.1757	0.230624	0.221334	0	0
1509	16976	4121609_at	16975	-9.4339	-2.9567	0.313412	0.128809	0	0
1510	19897	4132779_at	19896	-9.43375	-2.1361	0.226432	0.227493	0	0
1511	26083	NM_001953_at	26082	-9.4321	-1.62862	0.172668	0.323397	0	0
1512	4421	4073213_at	4420	-9.4319	-1.78916	0.189692	0.289341	0	0
1513	15808	4117179_at	15807	-9.43054	-1.59931	0.169588	0.330035	0	0
1514	4895	4075124_at	4894	-9.42836	-1.84088	0.195249	0.279151	0	0
1515	16305	4118971_at	16304	-9.4251	-2.47961	0.263086	0.179293	0	0
1516	15474	4115873_at	15473	-9.41776	-2.7566	0.292703	0.147972	0	0
1517	12951	4106301_at	12950	-9.41519	-4.23311	0.449604	0.0531749	0	0
1518	47934	XM_001132517_at	47933	-9.39801	-1.87808	0.199838	0.272046	0	0
1519	2825	4067093_at	2824	-9.38408	-1.93906	0.206633	0.260786	0	0
1520	11969	4102537_at	11968	-9.37858	-3.28648	0.350424	0.102487	0	0
1521	3165	4068348_at	3164	-9.37519	-2.63691	0.281264	0.160772	0	0
1522	26323	NM_002204_at	26322	-9.37252	-2.08631	0.222599	0.235482	0	0
1523	15135	4114560_at	15134	-9.37251	-2.84741	0.303804	0.138945	0	0
1524	35339	NM_020754_at	35338	-9.37148	-2.31748	0.24729	0.200618	0	0
1525	9619	4093609_at	9618	-9.36995	-1.68691	0.180034	0.310592	0	0
1526	17507	4123706_at	17506	-9.36458	-3.12182	0.333365	0.114878	0	0
1527	20754	4136109_at	20753	-9.35962	-2.66331	0.284553	0.157857	0	0
1528	8425	4089049_at	8424	-9.35613	-3.12174	0.333657	0.114885	0	0
1529	11983	4102595_at	11982	-9.35599	-3.27782	0.350345	0.103104	0	0
1530	36723	NM_024711_at	36722	-9.35533	-1.58731	0.169669	0.332791	0	0
1531	6378	4081089_at	6377	-9.35506	-2.34956	0.251153	0.196206	0	0
1532	39197	NM_130783_at	39196	-9.35431	-1.89591	0.202678	0.268704	0	0
1533	15367	4115480_at	15366	-9.35365	-2.96031	0.316487	0.128487	0	0
1534	10557	4097131_at	10556	-9.35007	-1.73658	0.185729	0.30008	0	0
1535	2583	4066105_at	2582	-9.34816	-2.55712	0.273543	0.169914	0	0
1536	5044	4075720_at	5043	-9.34022	-2.09161	0.223936	0.234619	0	0
1537	8194	4088108_at	8193	-9.33959	-2.68757	0.287761	0.155225	0	0
1538	17148	4122267_at	17147	-9.33948	-2.39622	0.256569	0.189962	0	0
1539	16344	4119094_at	16343	-9.33855	-2.28876	0.245087	0.204651	0	0
1540	10046	4095177_at	10045	-9.33781	-3.06327	0.32805	0.119637	0	0
1541	14964	4113902_at	14963	-9.33687	-1.75347	0.1878	0.296588	0	0
1542	20731	4136029_at	20730	-9.32798	-1.66411	0.1784	0.315539	0	0
1543	8356	4088726_at	8355	-9.32568	-3.09858	0.332263	0.116744	0	0
1544	40945	NM_152717_at	40944	-9.32232	-2.27069	0.243576	0.207231	0	0
1545	10203	4095753_at	10202	-9.32082	-3.68009	0.394824	0.0780161	0	0
1546	21481	NM_000757_at	21480	-9.31954	-1.99289	0.21384	0.251235	0	0
1547	15938	4117631_at	15937	-9.31747	-1.69997	0.18245	0.307793	0	0
1548	13441	4108147_at	13440	-9.31436	-2.72851	0.292935	0.150882	0	0
1549	17627	4124245_at	17626	-9.31178	-2.29732	0.246711	0.203441	0	0
1550	17872	4125150_at	17871	-9.3112	-1.91117	0.205255	0.265877	0	0
1551	20427	4134818_at	20426	-9.30867	-2.93873	0.315698	0.130423	0	0
1552	4276	4072592_at	4275	-9.30732	-1.76803	0.189961	0.29361	0	0
1553	41195	NM_153267_at	41194	-9.30702	-2.98017	0.320207	0.12673	0	0
1554	17618	4124196_at	17617	-9.30686	-3.18001	0.341685	0.110337	0	0
1555	27073	NM_003003_at	27072	-9.29817	-2.12809	0.228872	0.228761	0	0
1556	21924	NM_001002026_at	21923	-9.29418	-3.0213	0.325074	0.123168	0	0
1557	31690	NM_014033_at	31689	-9.29125	-1.98131	0.213244	0.25326	0	0
1558	11078	4099116_at	11077	-9.29005	-2.65553	0.285847	0.15871	0	0
1559	44702	NR_000012_at	44701	-9.28992	-2.01693	0.217109	0.247083	0	0
1560	19743	4132220_at	19742	-9.28793	-3.13764	0.337819	0.113626	0	0
1561	40229	NM_145234_at	40228	-9.28791	-2.76873	0.2981	0.146733	0	0
1562	15476	4115883_at	15475	-9.2878	-3.01032	0.324116	0.124109	0	0
1563	6671	4082205_at	6670	-9.27974	-2.93043	0.315788	0.131175	0	0
1564	20050	4133279_at	20049	-9.27945	-1.61437	0.173972	0.326608	0	0
1565	19832	4132536_at	19831	-9.27938	-3.07073	0.33092	0.119019	0	0
1566	45887	XM_001127394_at	45886	-9.27765	-2.1516	0.231912	0.225064	0	0
1567	45908	XM_001127445_at	45907	-9.27765	-2.1516	0.231912	0.225064	0	0
1568	14903	4113729_at	14902	-9.27592	-2.39447	0.258139	0.190192	0	0
1569	19889	4132738_at	19888	-9.26687	-2.55053	0.275231	0.170693	0	0
1570	28842	NM_004915_at	28841	-9.26024	-1.91788	0.207109	0.264643	0	0
1571	33634	NM_016818_at	33633	-9.26024	-1.91788	0.207109	0.264643	0	0
1572	1847	4063178_at	1846	-9.25829	-2.45102	0.264738	0.182882	0	0
1573	11908	4102258_at	11907	-9.25714	-2.65035	0.286304	0.159281	0	0
1574	47707	XM_001131989_at	47706	-9.25596	-2.96556	0.320394	0.12802	0	0
1575	47978	XM_001132639_at	47977	-9.25596	-2.96556	0.320394	0.12802	0	0
1576	20542	4135268_at	20541	-9.25424	-2.58593	0.279432	0.166555	0	0
1577	16966	4121556_at	16965	-9.25399	-1.67365	0.180857	0.313459	0	0
1578	18664	4128167_at	18663	-9.25189	-2.53487	0.273984	0.172555	0	0
1579	6999	4083413_at	6998	-9.24676	-1.74832	0.189073	0.297649	0	0
1580	17923	4125328_at	17922	-9.24651	-1.79382	0.194	0.288407	0	0
1581	37259	NM_030927_at	37258	-9.2457	-1.79697	0.194358	0.287778	0	0
1582	10048	4095180_at	10047	-9.2448	-1.62396	0.175662	0.324443	0	0
1583	17488	4123643_at	17487	-9.24422	-2.72752	0.295051	0.150986	0	0
1584	43385	NM_198057_at	43384	-9.24091	-2.00643	0.217125	0.248887	0	0
1585	11932	4102355_at	11931	-9.23652	-3.59871	0.389617	0.0825432	0	0
1586	7461	4085247_at	7460	-9.23462	-1.90196	0.205959	0.26758	0	0
1587	12979	4106386_at	12978	-9.23254	-2.61082	0.282785	0.163706	0	0
1588	16963	4121543_at	16962	-9.23084	-3.30384	0.357914	0.101261	0	0
1589	5241	4076482_at	5240	-9.22992	-2.46303	0.266852	0.181365	0	0
1590	24166	NM_001039132_at	24165	-9.22842	-2.29455	0.24864	0.203831	0	0
1591	17851	4125067_at	17850	-9.22717	-1.90644	0.206612	0.26675	0	0
1592	609	4058522_at	608	-9.22686	-2.73596	0.296521	0.150104	0	0
1593	9791	4094180_at	9790	-9.2192	-2.54838	0.27642	0.170947	0	0
1594	38235	NM_033016_at	38234	-9.21633	-1.73632	0.188396	0.300135	0	0
1595	14734	4113100_at	14733	-9.21529	-2.43769	0.264526	0.18458	0	0
1596	10776	4097931_at	10775	-9.21487	-2.85031	0.309317	0.138666	0	0
1597	20025	4133197_at	20024	-9.2124	-2.05924	0.223529	0.239943	0	0
1598	8498	4089376_at	8497	-9.21151	-3.43074	0.372441	0.0927349	0	0
1599	10887	4098370_at	10886	-9.21076	-3.22988	0.350663	0.106588	0	0
1600	44433	NM_207174_at	44432	-9.2103	-1.93727	0.210338	0.261109	0	0
1601	1189	4060614_at	1188	-9.20348	-3.50175	0.380481	0.088281	0	0
1602	31318	NM_012339_at	31317	-9.19953	-1.67985	0.182602	0.312115	0	0
1603	5063	4075805_at	5062	-9.19934	-2.58325	0.280809	0.166864	0	0
1604	17637	4124267_at	17636	-9.19636	-3.35808	0.365153	0.0975253	0	0
1605	10479	4096804_at	10478	-9.19359	-2.25659	0.245452	0.209266	0	0
1606	32537	NM_015103_at	32536	-9.18886	-1.65685	0.180311	0.31713	0	0
1607	27245	NM_003190_at	27244	-9.18841	-1.717	0.186866	0.304181	0	0
1608	10236	4095867_at	10235	-9.18507	-4.00683	0.436233	0.0622049	0	0
1609	35182	NM_020428_at	35181	-9.17825	-1.89635	0.206613	0.268622	0	0
1610	26125	NM_001996_at	26124	-9.15948	-2.23578	0.244094	0.212307	0	0
1611	7415	4085038_at	7414	-9.15924	-2.06041	0.224954	0.239748	0	0
1612	7343	4084757_at	7342	-9.15837	-2.29921	0.25105	0.203174	0	0
1613	3534	4069759_at	3533	-9.15654	-1.63843	0.178936	0.321205	0	0
1614	12159	4103310_at	12158	-9.15172	-3.01297	0.329225	0.123881	0	0
1615	19893	4132761_at	19892	-9.15105	-2.8161	0.307735	0.141994	0	0
1616	6727	4082418_at	6726	-9.14708	-2.08239	0.227656	0.236123	0	0
1617	30289	NM_006487_at	30288	-9.1463	-2.09241	0.228771	0.234489	0	0
1618	21224	NM_000459_at	21223	-9.14324	-2.4689	0.270025	0.180629	0	0
1619	4868	4075009_at	4867	-9.14311	-2.04029	0.22315	0.243115	0	0
1620	4747	4074546_at	4746	-9.1427	-2.49945	0.273382	0.176844	0	0
1621	9489	4093167_at	9488	-9.13866	-2.89182	0.316438	0.134733	0	0
1622	6153	4080229_at	6152	-9.13791	-2.62989	0.287801	0.161556	0	0
1623	7293	4084554_at	7292	-9.13699	-2.91016	0.318503	0.133032	0	0
1624	10450	4096676_at	10449	-9.13539	-3.54886	0.388473	0.0854453	0	0
1625	11324	4100030_at	11323	-9.1345	-2.27322	0.24886	0.206868	0	0
1626	29155	NM_005253_at	29154	-9.13233	-1.78869	0.195864	0.289434	0	0
1627	28951	NM_005031_at	28950	-9.1276	-1.92032	0.210386	0.264196	0	0
1628	16725	4120583_at	16724	-9.12722	-2.36666	0.259297	0.193894	0	0
1629	22612	NM_001007224_at	22611	-9.1266	-1.58506	0.173675	0.333311	0	0
1630	20527	4135210_at	20526	-9.12511	-1.953	0.214025	0.258279	0	0
1631	25717	NM_001544_at	25716	-9.12364	-2.29167	0.25118	0.204239	0	0
1632	15597	4116333_at	15596	-9.12072	-2.61143	0.286318	0.163637	0	0
1633	35391	NM_020820_at	35390	-9.11757	-1.65702	0.181739	0.317094	0	0
1634	4624	4074057_at	4623	-9.1173	-3.52319	0.386429	0.0869788	0	0
1635	13604	4108792_at	13603	-9.11159	-3.1426	0.344901	0.113236	0	0
1636	36018	NM_022164_at	36017	-9.11063	-1.73028	0.189919	0.301393	0	0
1637	8622	4089876_at	8621	-9.10746	-1.98484	0.217935	0.252642	0	0
1638	20536	4135254_at	20535	-9.10694	-2.25241	0.247329	0.209873	0	0
1639	5054	4075775_at	5053	-9.09889	-1.95737	0.215122	0.257498	0	0
1640	8109	4087800_at	8108	-9.09782	-1.69784	0.186621	0.308247	0	0
1641	34152	NM_018035_at	34151	-9.09468	-1.65691	0.182184	0.317118	0	0
1642	47932	XM_001132511_at	47931	-9.09405	-1.78819	0.196633	0.289535	0	0
1643	10779	4097942_at	10778	-9.09389	-2.16035	0.23756	0.223702	0	0
1644	5869	4079042_at	5868	-9.09126	-2.95366	0.32489	0.12908	0	0
1645	179	4056946_at	178	-9.08925	-2.4076	0.264884	0.188469	0	0
1646	7233	4084293_at	7232	-9.08915	-2.73109	0.300478	0.150612	0	0
1647	7384	4084935_at	7383	-9.08386	-1.88076	0.207044	0.271541	0	0
1648	48411	XM_001133796_at	48410	-9.08362	-2.78977	0.307121	0.144609	0	0
1649	7155	4084035_at	7154	-9.08087	-4.40996	0.485631	0.0470403	0	0
1650	10228	4095847_at	10227	-9.07975	-2.03591	0.224225	0.243855	0	0
1651	29380	NM_005501_at	29379	-9.06914	-2.07929	0.229271	0.236631	0	0
1652	50481	XM_936673_at	50480	-9.06796	-2.16414	0.238658	0.223115	0	0
1653	17001	4121727_at	17000	-9.06306	-2.329	0.256977	0.199022	0	0
1654	6863	4082932_at	6862	-9.06218	-2.82697	0.311952	0.140928	0	0
1655	6202	4080406_at	6201	-9.06091	-3.69564	0.407866	0.0771796	0	0
1656	1386	4061430_at	1385	-9.0608	-2.85371	0.314952	0.13834	0	0
1657	3092	4068114_at	3091	-9.05998	-3.05089	0.336744	0.120668	0	0
1658	15487	4115923_at	15486	-9.05592	-3.33998	0.368817	0.0987563	0	0
1659	6515	4081561_at	6514	-9.05343	-1.97511	0.218161	0.254351	0	0
1660	27948	NM_003955_at	27947	-9.052	-2.3512	0.259744	0.195982	0	0
1661	17366	4123127_at	17365	-9.05085	-2.3568	0.260395	0.195224	0	0
1662	26166	NM_002038_at	26165	-9.05083	-2.06729	0.228409	0.238608	0	0
1663	36259	NM_022872_at	36258	-9.05083	-2.06729	0.228409	0.238608	0	0
1664	36260	NM_022873_at	36259	-9.05083	-2.06729	0.228409	0.238608	0	0
1665	33693	NM_017434_at	33692	-9.05071	-1.86909	0.206513	0.273746	0	0
1666	10219	4095812_at	10218	-9.05009	-2.52969	0.279521	0.173176	0	0
1667	42197	NM_175940_at	42196	-9.04997	-1.93847	0.214197	0.260892	0	0
1668	44647	NM_213600_at	44646	-9.04338	-1.61298	0.17836	0.326922	0	0
1669	20313	4134381_at	20312	-9.0397	-2.37198	0.262395	0.193181	0	0
1670	13462	4108233_at	13461	-9.03924	-2.85925	0.316315	0.13781	0	0
1671	14982	4113963_at	14981	-9.03887	-2.95306	0.326706	0.129134	0	0
1672	28278	NM_004313_at	28277	-9.03757	-1.60675	0.177786	0.328336	0	0
1673	3699	4070453_at	3698	-9.03594	-2.22851	0.246627	0.213379	0	0
1674	41585	NM_172212_at	41584	-9.03226	-1.94274	0.215089	0.260122	0	0
1675	29450	NM_005572_at	29449	-9.02952	-1.82486	0.2021	0.282268	0	0
1676	44594	NM_207629_at	44593	-9.02946	-1.93867	0.214705	0.260857	0	0
1677	3670	4070332_at	3669	-9.02943	-3.28345	0.363639	0.102703	0	0
1678	12236	4103626_at	12235	-9.02364	-3.04619	0.337578	0.121062	0	0
1679	2337	4065095_at	2336	-9.01952	-1.60318	0.177745	0.329151	0	0
1680	578	4058410_at	577	-9.01734	-2.15457	0.238937	0.224599	0	0
1681	29477	NM_005601_at	29476	-9.01502	-1.93175	0.214281	0.262111	0	0
1682	21402	NM_000668_at	21401	-9.01329	-3.85412	0.427604	0.0691505	0	0
1683	6244	4080609_at	6243	-9.01216	-1.98072	0.219783	0.253363	0	0
1684	8906	4090896_at	8905	-9.0076	-1.71521	0.190418	0.304558	0	0
1685	7437	4085147_at	7436	-9.00545	-1.9111	0.212216	0.26589	0	0
1686	34734	NM_018950_at	34733	-9.00501	-1.94099	0.215545	0.260438	0	0
1687	3128	4068233_at	3127	-9.00494	-3.49785	0.388437	0.0885199	0	0
1688	15630	4116451_at	15629	-9.00352	-2.83738	0.315142	0.139914	0	0
1689	18576	4127858_at	18575	-8.99808	-2.48441	0.276104	0.178698	0	0
1690	6908	4083113_at	6907	-8.99554	-1.59034	0.176792	0.332094	0	0
1691	15123	4114525_at	15122	-8.99522	-1.85346	0.20605	0.276727	0	0
1692	34379	NM_018286_at	34378	-8.99382	-3.56747	0.396657	0.0843502	0	0
1693	10152	4095576_at	10151	-8.99014	-2.31168	0.257135	0.201426	0	0
1694	18997	4129336_at	18996	-8.98958	-2.52697	0.2811	0.173502	0	0
1695	9114	4091653_at	9113	-8.98201	-2.45153	0.272937	0.182817	0	0
1696	16898	4121289_at	16897	-8.9783	-2.06483	0.22998	0.239014	0	0
1697	8838	4090656_at	8837	-8.97652	-3.44884	0.384207	0.0915789	0	0
1698	16572	4119939_at	16571	-8.97584	-2.30796	0.25713	0.201946	0	0
1699	33207	NM_016113_at	33206	-8.97551	-1.67808	0.186962	0.312498	0	0
1700	543	4058295_at	542	-8.97374	-1.8179	0.20258	0.283633	0	0
1701	3624	4070132_at	3623	-8.97262	-2.28794	0.254991	0.204768	0	0
1702	26240	NM_002117_at	26239	-8.97097	-1.68567	0.187903	0.310859	0	0
1703	11269	4099843_at	11268	-8.96702	-2.07062	0.230915	0.238058	0	0
1704	12387	4104220_at	12386	-8.96699	-3.95596	0.44117	0.0644371	0	0
1705	10353	4096294_at	10352	-8.96556	-1.8399	0.205218	0.279342	0	0
1706	8364	4088769_at	8363	-8.96498	-2.297	0.256219	0.203485	0	0
1707	6336	4080907_at	6335	-8.96496	-1.94979	0.21749	0.258854	0	0
1708	15169	4114717_at	15168	-8.95343	-3.53052	0.394321	0.0865379	0	0
1709	1247	4060885_at	1246	-8.9529	-1.74778	0.19522	0.297759	0	0
1710	7128	4083920_at	7127	-8.94908	-2.7143	0.303305	0.152375	0	0
1711	9460	4093064_at	9459	-8.94621	-2.45122	0.273995	0.182856	0	0
1712	51635	XM_942532_at	51634	-8.94184	-1.91485	0.214146	0.265199	0	0
1713	7785	4086502_at	7784	-8.93844	-1.66655	0.186448	0.315005	0	0
1714	27937	NM_003944_at	27936	-8.93349	-2.57007	0.287689	0.168397	0	0
1715	4466	4073399_at	4465	-8.93292	-2.02443	0.226626	0.245802	0	0
1716	7385	4084936_at	7384	-8.93222	-3.09725	0.346751	0.116852	0	0
1717	2990	4067712_at	2989	-8.93071	-2.07654	0.232516	0.237083	0	0
1718	1176	4060567_at	1175	-8.92937	-4.32043	0.483845	0.0500519	0	0
1719	20689	4135855_at	20688	-8.92759	-1.99692	0.22368	0.250534	0	0
1720	12786	4105652_at	12785	-8.92164	-2.21278	0.248024	0.215718	0	0
1721	48994	XM_370876_at	48993	-8.9187	-2.8227	0.316492	0.141346	0	0
1722	21264	NM_000507_at	21263	-8.91188	-2.84157	0.318852	0.139509	0	0
1723	36479	NM_024299_at	36478	-8.91109	-1.87646	0.210576	0.27235	0	0
1724	4526	4073659_at	4525	-8.90909	-1.91278	0.2147	0.265579	0	0
1725	6511	4081532_at	6510	-8.90656	-2.04051	0.229102	0.243077	0	0
1726	10272	4096005_at	10271	-8.89936	-2.44274	0.274485	0.183934	0	0
1727	13479	4108307_at	13478	-8.89933	-3.02802	0.340253	0.122595	0	0
1728	36759	NM_024756_at	36758	-8.8964	-1.6574	0.1863	0.317009	0	0
1729	16505	4119674_at	16504	-8.89383	-2.33746	0.262818	0.197859	0	0
1730	14885	4113664_at	14884	-8.87311	-2.03435	0.229272	0.244117	0	0
1731	20514	4135155_at	20513	-8.86875	-1.66802	0.188078	0.314685	0	0
1732	7903	4086986_at	7902	-8.86844	-1.61806	0.182452	0.325773	0	0
1733	8076	4087685_at	8075	-8.86688	-2.54246	0.286737	0.171649	0	0
1734	18671	4128188_at	18670	-8.8635	-2.09882	0.236794	0.233449	0	0
1735	26346	NM_002228_at	26345	-8.8625	-2.15729	0.243418	0.224177	0	0
1736	9259	4092236_at	9258	-8.85896	-2.66082	0.300354	0.158129	0	0
1737	16548	4119841_at	16547	-8.8562	-2.89625	0.327031	0.13432	0	0
1738	11288	4099921_at	11287	-8.84898	-3.37422	0.381312	0.0964404	0	0
1739	16032	4117963_at	16031	-8.84837	-2.25401	0.254738	0.20964	0	0
1740	776	4059172_at	775	-8.83543	-2.41812	0.273685	0.187099	0	0
1741	8058	4087608_at	8057	-8.83479	-1.8385	0.208098	0.279613	0	0
1742	2211	4064644_at	2210	-8.82984	-3.39773	0.384801	0.0948815	0	0
1743	12502	4104613_at	12501	-8.82944	-1.87776	0.21267	0.272107	0	0
1744	4045	4071742_at	4044	-8.82668	-2.94113	0.333209	0.130206	0	0
1745	12352	4104078_at	12351	-8.82426	-2.56824	0.291043	0.16861	0	0
1746	19236	4130294_at	19235	-8.82397	-3.14153	0.356023	0.113319	0	0
1747	40868	NM_152611_at	40867	-8.8234	-1.99405	0.225995	0.251033	0	0
1748	4056	4071776_at	4055	-8.8217	-2.7991	0.317297	0.143677	0	0
1749	18536	4127706_at	18535	-8.82111	-3.08259	0.349456	0.118045	0	0
1750	14752	4113175_at	14751	-8.81655	-1.97427	0.223928	0.254498	0	0
1751	4800	4074772_at	4799	-8.81333	-1.8199	0.206493	0.283241	0	0
1752	21325	NM_000578_at	21324	-8.81275	-1.81486	0.205936	0.284232	0	0
1753	20040	4133237_at	20039	-8.81263	-2.36489	0.268352	0.194132	0	0
1754	19940	4132910_at	19939	-8.81057	-3.03339	0.34429	0.12214	0	0
1755	16315	4118993_at	16314	-8.81001	-2.69073	0.305417	0.154885	0	0
1756	19515	4131358_at	19514	-8.8067	-2.91018	0.330451	0.13303	0	0
1757	21557	NM_000837_at	21556	-8.80585	-1.68579	0.19144	0.310832	0	0
1758	20578	4135401_at	20577	-8.80223	-3.63631	0.413112	0.0804195	0	0
1759	12099	4103085_at	12098	-8.80002	-2.50034	0.284129	0.176735	0	0
1760	15134	4114558_at	15133	-8.79986	-3.01888	0.34306	0.123375	0	0
1761	4926	4075210_at	4925	-8.7982	-2.25303	0.256078	0.209783	0	0
1762	18866	4128853_at	18865	-8.79205	-3.07391	0.349624	0.118757	0	0
1763	5124	4076006_at	5123	-8.7907	-2.91183	0.33124	0.132877	0	0
1764	18407	4127221_at	18406	-8.78902	-2.09412	0.238265	0.234211	0	0
1765	7411	4085029_at	7410	-8.78559	-1.60562	0.182757	0.328593	0	0
1766	2153	4064395_at	2152	-8.77897	-2.87037	0.32696	0.136751	0	0
1767	20318	4134406_at	20317	-8.77797	-3.49886	0.398596	0.0884582	0	0
1768	17427	4123377_at	17426	-8.77709	-2.87891	0.328003	0.135944	0	0
1769	6633	4082004_at	6632	-8.77122	-3.82965	0.436616	0.070333	0	0
1770	9587	4093507_at	9586	-8.76613	-1.8537	0.211462	0.276682	0	0
1771	10320	4096195_at	10319	-8.76286	-2.35001	0.268178	0.196145	0	0
1772	14448	4112035_at	14447	-8.76176	-2.17455	0.248187	0.221511	0	0
1773	2306	4064987_at	2305	-8.74836	-2.79697	0.319714	0.143889	0	0
1774	4317	4072774_at	4316	-8.73924	-1.61687	0.185013	0.326041	0	0
1775	20473	4135019_at	20472	-8.73878	-2.36381	0.270497	0.194277	0	0
1776	26077	NM_001946_at	26076	-8.73764	-2.72558	0.311936	0.151188	0	0
1777	263	4057245_at	262	-8.73542	-2.17573	0.24907	0.22133	0	0
1778	33308	NM_016246_at	33307	-8.73119	-1.66788	0.191025	0.314716	0	0
1779	24691	NM_001042747_at	24690	-8.72172	-1.59586	0.182975	0.330825	0	0
1780	13073	4106732_at	13072	-8.71896	-2.884	0.330773	0.135466	0	0
1781	12363	4104133_at	12362	-8.71633	-1.92144	0.220441	0.263992	0	0
1782	53078	XR_016185_at	53077	-8.7104	-1.66264	0.190879	0.315862	0	0
1783	2528	4065894_at	2527	-8.70872	-3.58261	0.411382	0.0834696	0	0
1784	23771	NM_001030288_at	23770	-8.70743	-1.62827	0.186998	0.323476	0	0
1785	21670	NM_000956_at	21669	-8.70477	-1.77565	0.203986	0.292062	0	0
1786	9446	4093001_at	9445	-8.70445	-2.67655	0.307492	0.156415	0	0
1787	1600	4062201_at	1599	-8.70155	-2.7739	0.318782	0.146209	0	0
1788	10937	4098579_at	10936	-8.70084	-1.66352	0.19119	0.315669	0	0
1789	13429	4108102_at	13428	-8.70042	-3.49839	0.402094	0.0884869	0	0
1790	8464	4089227_at	8463	-8.69761	-1.9403	0.223084	0.260563	0	0
1791	19603	4131698_at	19602	-8.69477	-1.73599	0.199659	0.300203	0	0
1792	14139	4110868_at	14138	-8.69244	-2.32482	0.267453	0.1996	0	0
1793	5383	4077045_at	5382	-8.69148	-3.64442	0.419309	0.0799689	0	0
1794	6565	4081697_at	6564	-8.68787	-2.10564	0.242366	0.232348	0	0
1795	6317	4080850_at	6316	-8.68561	-3.01331	0.346931	0.123852	0	0
1796	20974	NM_000201_at	20973	-8.68484	-2.57416	0.296397	0.167919	0	0
1797	17989	4125549_at	17988	-8.68483	-2.6546	0.305659	0.158813	0	0
1798	17730	4124586_at	17729	-8.67857	-2.70695	0.311912	0.153153	0	0
1799	41445	NM_170707_at	41444	-8.67826	-1.77328	0.204336	0.292542	0	0
1800	10473	4096768_at	10472	-8.67646	-1.79078	0.206396	0.289015	0	0
1801	25505	NM_001300_at	25504	-8.67528	-2.17326	0.250511	0.22171	0	0
1802	35313	NM_020717_at	35312	-8.67137	-1.8274	0.21074	0.281771	0	0
1803	10947	4098595_at	10946	-8.65826	-1.84407	0.212984	0.278534	0	0
1804	1925	4063484_at	1924	-8.65706	-2.01537	0.232801	0.247351	0	0
1805	6518	4081574_at	6517	-8.65528	-2.16542	0.250185	0.222918	0	0
1806	29529	NM_005656_at	29528	-8.65403	-2.83765	0.327899	0.139889	0	0
1807	2702	4066571_at	2701	-8.65384	-2.65	0.306223	0.15932	0	0
1808	12406	4104281_at	12405	-8.65354	-2.51281	0.290379	0.175214	0	0
1809	5667	4078189_at	5666	-8.65299	-1.74755	0.201959	0.297808	0	0
1810	20598	4135475_at	20597	-8.65111	-2.72829	0.315369	0.150905	0	0
1811	10277	4096030_at	10276	-8.65019	-2.65503	0.306934	0.158765	0	0
1812	45986	XM_001127615_at	45985	-8.64908	-1.94478	0.224854	0.259755	0	0
1813	47723	XM_001132036_at	47722	-8.64908	-1.94478	0.224854	0.259755	0	0
1814	10792	4097996_at	10791	-8.64862	-1.79869	0.207975	0.287435	0	0
1815	6311	4080829_at	6310	-8.64802	-3.07702	0.355807	0.118502	0	0
1816	44592	NM_207627_at	44591	-8.64337	-1.73514	0.200748	0.300379	0	0
1817	10584	4097240_at	10583	-8.6413	-3.37076	0.390075	0.0966722	0	0
1818	5140	4076065_at	5139	-8.64124	-2.45183	0.283736	0.182779	0	0
1819	20118	4133509_at	20117	-8.63314	-2.96229	0.34313	0.128311	0	0
1820	17331	4122968_at	17330	-8.63261	-2.35461	0.272758	0.19552	0	0
1821	36065	NM_022377_at	36064	-8.63129	-2.12183	0.24583	0.229756	0	0
1822	51246	XM_940575_at	51245	-8.63027	-1.61508	0.187141	0.326448	0	0
1823	12519	4104683_at	12518	-8.62832	-2.46595	0.285797	0.180999	0	0
1824	11042	4099026_at	11041	-8.62618	-3.06539	0.355359	0.119461	0	0
1825	19210	4130174_at	19209	-8.62363	-2.81866	0.326853	0.141742	0	0
1826	17714	4124539_at	17713	-8.61963	-2.84463	0.330018	0.139213	0	0
1827	4139	4072109_at	4138	-8.61519	-1.66934	0.193767	0.314397	0	0
1828	6305	4080796_at	6304	-8.61497	-1.92415	0.22335	0.263495	0	0
1829	10033	4095121_at	10032	-8.61397	-3.10736	0.360735	0.116036	0	0
1830	11992	4102628_at	11991	-8.61337	-2.93389	0.34062	0.130862	0	0
1831	27066	NM_002996_at	27065	-8.61271	-1.78622	0.207393	0.289932	0	0
1832	9945	4094820_at	9944	-8.60451	-2.58101	0.29996	0.167124	0	0
1833	14335	4111601_at	14334	-8.59611	-2.4852	0.289108	0.178599	0	0
1834	277	4057294_at	276	-8.59333	-3.11847	0.362894	0.115145	0	0
1835	1487	4061798_at	1486	-8.59213	-2.50202	0.291199	0.176529	0	0
1836	41446	NM_170708_at	41445	-8.59166	-1.72248	0.200483	0.303027	0	0
1837	3435	4069400_at	3434	-8.58858	-2.11583	0.246354	0.230712	0	0
1838	4476	4073437_at	4475	-8.588	-2.78685	0.324506	0.144902	0	0
1839	16441	4119469_at	16440	-8.58689	-2.77593	0.323275	0.146003	0	0
1840	20505	4135127_at	20504	-8.58378	-2.32348	0.270683	0.199785	0	0
1841	13146	4107054_at	13145	-8.57954	-2.03103	0.236729	0.244681	0	0
1842	20983	NM_000211_at	20982	-8.57773	-2.32703	0.271287	0.199294	0	0
1843	15603	4116355_at	15602	-8.57548	-2.14083	0.249646	0.226749	0	0
1844	7466	4085262_at	7465	-8.57394	-2.76146	0.322076	0.147475	0	0
1845	17312	4122895_at	17311	-8.57257	-2.02132	0.235789	0.246333	0	0
1846	20486	4135054_at	20485	-8.5675	-2.0398	0.238086	0.243197	0	0
1847	6382	4081101_at	6381	-8.56672	-1.9817	0.231326	0.253191	0	0
1848	6022	4079673_at	6021	-8.56364	-2.01906	0.235771	0.246719	0	0
1849	9382	4092765_at	9381	-8.55947	-1.92182	0.224526	0.263921	0	0
1850	18278	4126661_at	18277	-8.55876	-2.06063	0.240763	0.239712	0	0
1851	51619	XM_942448_at	51618	-8.55408	-2.16049	0.252568	0.22368	0	0
1852	44075	NM_201591_at	44074	-8.5532	-2.36836	0.276898	0.193666	0	0
1853	9653	4093725_at	9652	-8.54994	-2.27043	0.265549	0.207268	0	0
1854	40206	NM_145183_at	40205	-8.54921	-1.69482	0.198242	0.308894	0	0
1855	15966	4117732_at	15965	-8.54739	-2.15487	0.252108	0.224554	0	0
1856	16298	4118953_at	16297	-8.54331	-1.66576	0.194978	0.315179	0	0
1857	7421	4085066_at	7420	-8.54245	-2.60159	0.304549	0.164756	0	0
1858	2656	4066384_at	2655	-8.5421	-2.08383	0.243948	0.235888	0	0
1859	34660	NM_018833_at	34659	-8.5404	-1.61902	0.189571	0.325558	0	0
1860	11283	4099894_at	11282	-8.53944	-2.74523	0.321476	0.149144	0	0
1861	9318	4092498_at	9317	-8.53681	-2.15336	0.252244	0.224788	0	0
1862	1613	4062253_at	1612	-8.53166	-2.77421	0.325166	0.146177	0	0
1863	12948	4106282_at	12947	-8.53091	-2.78929	0.326963	0.144657	0	0
1864	9320	4092500_at	9319	-8.52696	-1.86809	0.219081	0.273935	0	0
1865	6954	4083266_at	6953	-8.5241	-2.09198	0.24542	0.234559	0	0
1866	5445	4077274_at	5444	-8.52279	-1.74787	0.205082	0.297741	0	0
1867	13084	4106804_at	13083	-8.52127	-2.12248	0.24908	0.229652	0	0
1868	9491	4093171_at	9490	-8.51948	-1.96453	0.230593	0.256223	0	0
1869	27075	NM_003005_at	27074	-8.51671	-2.00337	0.235228	0.249417	0	0
1870	21500	NM_000779_at	21499	-8.51589	-3.51759	0.413061	0.0873175	0	0
1871	4509	4073609_at	4508	-8.51135	-2.27177	0.266911	0.207075	0	0
1872	5728	4078475_at	5727	-8.51039	-1.91743	0.225305	0.264726	0	0
1873	43766	NM_198951_at	43765	-8.50616	-2.43708	0.286507	0.184657	0	0
1874	15107	4114471_at	15106	-8.50447	-2.51281	0.29547	0.175214	0	0
1875	7671	4086097_at	7670	-8.49928	-1.86136	0.219002	0.275216	0	0
1876	14914	4113754_at	14913	-8.49601	-2.8311	0.333227	0.140525	0	0
1877	21432	NM_000698_at	21431	-8.49392	-2.35667	0.277454	0.195241	0	0
1878	6550	4081655_at	6549	-8.49286	-1.96224	0.231045	0.25663	0	0
1879	27296	NM_003255_at	27295	-8.49269	-1.65086	0.194386	0.31845	0	0
1880	5186	4076237_at	5185	-8.49208	-3.2386	0.381367	0.105946	0	0
1881	2517	4065851_at	2516	-8.49188	-2.11837	0.249458	0.230307	0	0
1882	14952	4113865_at	14951	-8.48891	-2.75495	0.324535	0.148142	0	0
1883	11949	4102438_at	11948	-8.48839	-1.89197	0.222889	0.269439	0	0
1884	11098	4099194_at	11097	-8.48481	-3.8348	0.451961	0.0700824	0	0
1885	12395	4104240_at	12394	-8.48312	-2.74423	0.323493	0.149247	0	0
1886	44595	NM_207630_at	44594	-8.47315	-1.62042	0.191242	0.32524	0	0
1887	15815	4117202_at	15814	-8.47119	-2.8535	0.336847	0.13836	0	0
1888	30511	NM_006732_at	30510	-8.47006	-3.18209	0.375687	0.110178	0	0
1889	11645	4101277_at	11644	-8.46744	-1.89089	0.223314	0.26964	0	0
1890	9530	4093304_at	9529	-8.46249	-2.88472	0.340884	0.135398	0	0
1891	13283	4107532_at	13282	-8.46158	-2.17812	0.257413	0.220963	0	0
1892	20331	4134453_at	20330	-8.45985	-2.00951	0.237535	0.248357	0	0
1893	20703	4135906_at	20702	-8.45619	-2.21708	0.262184	0.215077	0	0
1894	2428	4065479_at	2427	-8.45497	-2.39836	0.283663	0.18968	0	0
1895	1244	4060875_at	1243	-8.45249	-2.98944	0.353675	0.125919	0	0
1896	14860	4113577_at	14859	-8.45117	-2.85049	0.337289	0.138649	0	0
1897	5363	4076966_at	5362	-8.44908	-3.07426	0.363858	0.118728	0	0
1898	10379	4096400_at	10378	-8.44747	-1.65709	0.196164	0.317079	0	0
1899	5351	4076920_at	5350	-8.4448	-2.16171	0.255982	0.223491	0	0
1900	2024	4063892_at	2023	-8.44199	-3.81868	0.452344	0.07087	0	0
1901	8347	4088695_at	8346	-8.44165	-1.83503	0.217378	0.280285	0	0
1902	23429	NM_001018011_at	23428	-8.43824	-2.54645	0.301775	0.171176	0	0
1903	1362	4061296_at	1361	-8.43394	-1.70892	0.202624	0.305889	0	0
1904	11442	4100454_at	11441	-8.43071	-2.80652	0.332893	0.14294	0	0
1905	5431	4077204_at	5430	-8.43054	-3.2205	0.382004	0.107283	0	0
1906	182	4056959_at	181	-8.43017	-1.72085	0.204129	0.303371	0	0
1907	33338	NM_016286_at	33337	-8.42704	-1.66431	0.197497	0.315494	0	0
1908	12813	4105769_at	12812	-8.42573	-1.85087	0.219669	0.277226	0	0
1909	433	4057902_at	432	-8.4235	-3.38491	0.401841	0.0957285	0	0
1910	302	4057397_at	301	-8.42217	-2.35432	0.279538	0.19556	0	0
1911	17200	4122472_at	17199	-8.41779	-2.92249	0.34718	0.131899	0	0
1912	16517	4119720_at	16516	-8.41736	-2.15195	0.255656	0.225009	0	0
1913	4329	4072825_at	4328	-8.41538	-2.40633	0.285945	0.188635	0	0
1914	4348	4072884_at	4347	-8.41365	-3.13164	0.372209	0.114099	0	0
1915	19206	4130158_at	19205	-8.40578	-2.64227	0.31434	0.160176	0	0
1916	19880	4132702_at	19879	-8.4041	-2.4041	0.286062	0.188927	0	0
1917	7446	4085201_at	7445	-8.40308	-3.42636	0.407751	0.093017	0	0
1918	8724	4090219_at	8723	-8.40163	-3.08994	0.367779	0.117445	0	0
1919	31090	NM_012072_at	31089	-8.40141	-1.99169	0.237067	0.251444	0	0
1920	22811	NM_001009184_at	22810	-8.39942	-1.70104	0.202519	0.307564	0	0
1921	14559	4112425_at	14558	-8.39859	-2.23902	0.266595	0.21183	0	0
1922	2074	4064100_at	2073	-8.3983	-1.63182	0.194304	0.322681	0	0
1923	44593	NM_207628_at	44592	-8.39818	-1.66204	0.197905	0.315992	0	0
1924	8537	4089521_at	8536	-8.39607	-2.91055	0.346656	0.132996	0	0
1925	20546	4135275_at	20545	-8.39295	-2.38934	0.284684	0.19087	0	0
1926	33406	NM_016369_at	33405	-8.39027	-3.67884	0.438465	0.0780833	0	0
1927	36155	NM_022652_at	36154	-8.38832	-2.52127	0.30057	0.174189	0	0
1928	12914	4106161_at	12913	-8.38548	-1.76084	0.209987	0.295076	0	0
1929	20539	4135260_at	20538	-8.38209	-2.4593	0.293399	0.181835	0	0
1930	3234	4068617_at	3233	-8.37821	-3.0326	0.361962	0.122207	0	0
1931	41252	NM_153366_at	41251	-8.37072	-2.41838	0.28891	0.187066	0	0
1932	2953	4067579_at	2952	-8.36781	-2.79903	0.3345	0.143683	0	0
1933	44	4056388_at	43	-8.36399	-3.07267	0.367368	0.11886	0	0
1934	24814	NM_001076778_at	24813	-8.36305	-1.8026	0.215543	0.286658	0	0
1935	20107	4133475_at	20106	-8.35971	-3.60892	0.431704	0.0819609	0	0
1936	23502	NM_001020820_at	23501	-8.35644	-2.08338	0.249314	0.235961	0	0
1937	28200	NM_004230_at	28199	-8.35442	-1.6225	0.194209	0.324772	0	0
1938	5714	4078417_at	5713	-8.35414	-2.5038	0.299708	0.176311	0	0
1939	2515	4065841_at	2514	-8.35309	-1.76141	0.21087	0.294959	0	0
1940	46193	XM_001128220_at	46192	-8.35062	-1.89743	0.22722	0.268421	0	0
1941	9271	4092280_at	9270	-8.34218	-1.62628	0.194946	0.323923	0	0
1942	16398	4119326_at	16397	-8.34002	-2.09914	0.251695	0.233397	0	0
1943	6687	4082280_at	6686	-8.33963	-1.67699	0.201087	0.312734	0	0
1944	16154	4118383_at	16153	-8.33626	-1.76991	0.212315	0.293227	0	0
1945	15072	4114313_at	15071	-8.32912	-2.15818	0.259113	0.224039	0	0
1946	17007	4121750_at	17006	-8.32648	-2.80008	0.336286	0.143579	0	0
1947	13271	4107488_at	13270	-8.32579	-2.38113	0.285995	0.191959	0	0
1948	2348	4065141_at	2347	-8.32494	-2.14886	0.258123	0.225491	0	0
1949	27130	NM_003062_at	27129	-8.32371	-1.86766	0.224378	0.274018	0	0
1950	15344	4115415_at	15343	-8.32358	-2.99584	0.359922	0.125361	0	0
1951	19244	4130321_at	19243	-8.31981	-2.82222	0.339216	0.141393	0	0
1952	4463	4073389_at	4462	-8.31722	-2.39895	0.288432	0.189602	0	0
1953	8015	4087424_at	8014	-8.31303	-2.89239	0.347935	0.13468	0	0
1954	21547	NM_000827_at	21546	-8.312	-1.67403	0.201399	0.313376	0	0
1955	7320	4084675_at	7319	-8.31173	-2.09866	0.252493	0.233476	0	0
1956	7603	4085817_at	7602	-8.30682	-3.16974	0.381582	0.111126	0	0
1957	3041	4067934_at	3040	-8.30651	-2.6629	0.32058	0.157902	0	0
1958	15004	4114023_at	15003	-8.30504	-1.67638	0.201851	0.312866	0	0
1959	6582	4081767_at	6581	-8.30074	-2.23562	0.269328	0.21233	0	0
1960	30903	NM_007177_at	30902	-8.29892	-1.75668	0.211676	0.295928	0	0
1961	1331	4061188_at	1330	-8.29767	-1.9026	0.229293	0.267461	0	0
1962	5637	4078059_at	5636	-8.29764	-2.69526	0.324823	0.154399	0	0
1963	15445	4115736_at	15444	-8.29755	-1.60729	0.193707	0.328214	0	0
1964	13928	4110011_at	13927	-8.29501	-2.68004	0.32309	0.156037	0	0
1965	6604	4081863_at	6603	-8.29316	-1.67546	0.202029	0.313066	0	0
1966	38634	NM_052863_at	38633	-8.29174	-2.20172	0.265532	0.217378	0	0
1967	45917	XM_001127464_at	45916	-8.29104	-2.44224	0.294564	0.183998	0	0
1968	15751	4116973_at	15750	-8.27878	-3.75078	0.453059	0.0742854	0	0
1969	29168	NM_005266_at	29167	-8.27435	-2.11441	0.255538	0.230941	0	0
1970	28139	NM_004165_at	28138	-8.27145	-2.15064	0.260008	0.225212	0	0
1971	6020	4079665_at	6019	-8.27025	-3.52922	0.426737	0.0866163	0	0
1972	1655	4062445_at	1654	-8.26942	-1.70746	0.206478	0.3062	0	0
1973	10158	4095591_at	10157	-8.26875	-1.68272	0.203504	0.311494	0	0
1974	12939	4106247_at	12938	-8.26595	-2.80999	0.339948	0.142596	0	0
1975	4690	4074332_at	4689	-8.26375	-1.67284	0.202431	0.313635	0	0
1976	529	4058246_at	528	-8.25682	-2.18949	0.265174	0.219229	0	0
1977	7112	4083835_at	7111	-8.24299	-3.00159	0.364139	0.124862	0	0.00208871
1978	9581	4093482_at	9580	-8.23815	-2.68177	0.32553	0.15585	0	0.00792515
1979	12577	4104900_at	12576	-8.23545	-2.06752	0.251051	0.23857	0	0.0111901
1980	9585	4093495_at	9584	-8.23279	-3.01055	0.365678	0.124089	0	0.0144115
1981	14307	4111508_at	14306	-8.22967	-2.66181	0.32344	0.158022	0	0.0181937
1982	41611	NM_172313_at	41610	-8.22728	-1.59367	0.193706	0.331327	0	0.0210941
1983	32940	NM_015675_at	32939	-8.22292	-1.93102	0.234833	0.262244	0	0.026398
1984	16362	4119183_at	16361	-8.22249	-2.29935	0.279642	0.203155	0	0.0269296
1985	1061	4060199_at	1060	-8.21916	-2.01002	0.244552	0.24827	0	0.0309879
1986	20605	4135507_at	20604	-8.2173	-2.46421	0.299881	0.181217	0	0.0332611
1987	25593	NM_001402_at	25592	-8.21612	-1.69826	0.206698	0.308158	0	0.0347002
1988	16027	4117944_at	16026	-8.2146	-1.73775	0.211544	0.299838	0	0.0365588
1989	1940	4063543_at	1939	-8.21452	-2.03692	0.247965	0.243684	0	0.0366583
1990	25713	NM_001540_at	25712	-8.21404	-1.62461	0.197784	0.324298	0	0.0372447
1991	15504	4115990_at	15503	-8.21217	-2.33576	0.284427	0.198091	0	0.0395399
1992	20182	4133791_at	20181	-8.20362	-3.15653	0.384772	0.112148	0	0.0500513
1993	10488	4096837_at	10487	-8.20226	-1.70986	0.208462	0.30569	0	0.0517245
1994	20132	4133599_at	20131	-8.19931	-2.7234	0.332151	0.151417	0	0.0553729
1995	28056	NM_004073_at	28055	-8.19578	-1.796	0.219137	0.287971	0	0.0597292
1996	4621	4074034_at	4620	-8.19412	-2.26367	0.276256	0.208241	0	0.0617876
1997	12540	4104774_at	12539	-8.19204	-2.38327	0.290925	0.191674	0	0.0643722
1998	1657	4062452_at	1656	-8.19087	-1.9067	0.232784	0.266701	0	0.0658262
1999	17891	4125236_at	17890	-8.18872	-2.06603	0.252302	0.238816	0	0.0684886
[truncated: 244 more rows]

## Sheet: SCLC up
order	Row	Gene ID	Gene Name	Score(d)	Numerator(r)	Denominator(s+s0)	Fold Change	q-value(%)	localfdr(%)
1	34547	NM_018476_at	34546	21.1709	5.27976	0.249388	38.8478	0	0.144567
2	42356	NM_178012_at	42355	20.9327	4.55654	0.217676	23.5318	0	0.140719
3	44194	NM_203399_at	44193	20.7378	4.20001	0.202529	18.3793	0	0.13754
4	29442	NM_005563_at	29441	20.6663	4.11471	0.199102	17.3241	0	0.136359
5	44196	NM_203401_at	44195	19.7247	3.99018	0.202293	15.8915	0	0.118945
6	37545	NM_031966_at	37544	18.9986	3.93021	0.206868	15.2445	0	0.100069
7	26990	NM_002916_at	26989	18.4879	3.04673	0.164796	8.26339	0	0.0812323
8	42709	NM_181573_at	42708	18.3297	3.15189	0.171956	8.88821	0	0.0741054
9	28412	NM_004456_at	28411	17.7204	3.69495	0.208515	12.9506	0	0.0392618
10	25461	NM_001254_at	25460	17.5829	3.59856	0.204662	12.1136	0	0.0294938
11	41102	NM_152998_at	41101	17.4622	3.68263	0.210891	12.8405	0	0.0202478
12	34178	NM_018063_at	34177	17.208	3.68332	0.214047	12.8466	0	0
13	35435	NM_020890_at	35434	17.1405	2.78075	0.162233	6.87208	0	0
14	37178	NM_030771_at	37177	16.9723	1.69707	0.0999903	3.24241	0	0
15	38535	NM_033505_at	38534	16.883	2.12218	0.1257	4.35352	0	0
16	24793	NM_001067_at	24792	16.7028	5.01657	0.300344	32.3698	0	0
17	31482	NM_013277_at	31481	16.5719	2.9651	0.178923	7.80881	0	0
18	31763	NM_014176_at	31762	16.5338	3.49955	0.21166	11.3101	0	0
19	28476	NM_004523_at	28475	16.5319	3.48771	0.210969	11.2178	0	0
20	33945	NM_017779_at	33944	16.4736	3.46761	0.210495	11.0625	0	0
21	45127	NR_003098_at	45126	16.2943	2.75935	0.169345	6.77093	0	0
22	44871	NR_002561_at	44870	16.1057	2.55611	0.158708	5.88119	0	0
23	43938	NM_199414_at	43937	16.0723	3.98909	0.248197	15.8795	0	0
24	31064	NM_007363_at	31063	16.0518	1.83744	0.11447	3.57376	0	0
25	53042	XR_016140_at	53041	16.0261	1.7836	0.111293	3.44283	0	0
26	55403	XR_018705_at	55402	16.0261	1.7836	0.111293	3.44283	0	0
27	49222	XM_377476_at	49221	15.961	1.74213	0.10915	3.34529	0	0
28	34446	NM_018361_at	34445	15.8934	2.63475	0.165776	6.21068	0	0
29	43572	NM_198468_at	43571	15.8927	2.3779	0.149622	5.1978	0	0
30	43937	NM_199413_at	43936	15.8834	3.95608	0.249071	15.5203	0	0
31	32242	NM_014750_at	32241	15.8647	3.83335	0.241627	14.2545	0	0
32	37398	NM_031423_at	37397	15.846	4.44277	0.280371	21.7473	0	0
33	29486	NM_005610_at	29485	15.8429	1.8289	0.11544	3.55266	0	0
34	25926	NM_001786_at	25925	15.8376	3.69478	0.233292	12.9491	0	0
35	27972	NM_003981_at	27971	15.7965	3.90699	0.247333	15.001	0	0
36	33657	NM_016937_at	33656	15.7506	2.56037	0.162557	5.89857	0	0
37	29008	NM_005093_at	29007	15.6872	2.25744	0.143903	4.78142	0	0
38	42094	NM_175085_at	42093	15.5544	1.65974	0.106706	3.1596	0	0
39	24270	NM_001039709_at	24269	15.5162	2.30959	0.148851	4.95744	0	0
40	36317	NM_023071_at	36316	15.4569	2.20843	0.142877	4.62171	0	0
41	37578	NM_032043_at	37577	15.4002	3.26718	0.212152	9.62762	0	0
42	34016	NM_017861_at	34015	15.379	1.73748	0.112978	3.33453	0	0
43	26782	NM_002703_at	26781	15.3567	2.28711	0.148932	4.88076	0	0
44	27351	NM_003318_at	27350	15.3052	3.21858	0.210293	9.3087	0	0
45	21021	NM_000251_at	21020	15.2745	3.17522	0.207877	9.03311	0	0
46	36214	NM_022782_at	36213	15.245	2.64283	0.173357	6.24556	0	0
47	33222	NM_016132_at	33221	15.2393	3.06328	0.201012	8.35872	0	0
48	40343	NM_145697_at	40342	15.2181	4.29387	0.282156	19.6147	0	0
49	38467	NM_033379_at	38466	15.1996	3.64476	0.239793	12.5078	0	0
50	51564	XM_942142_at	51563	15.1697	2.77329	0.182818	6.83666	0	0
51	28641	NM_004701_at	28640	15.137	3.89338	0.257209	14.8602	0	0
52	36188	NM_022754_at	36187	15.1153	2.15923	0.142851	4.46676	0	0
53	40801	NM_152524_at	40800	15.0878	2.18084	0.144544	4.53418	0	0
54	32228	NM_014736_at	32227	15.0524	3.12626	0.207692	8.73167	0	0
55	33385	NM_016343_at	33384	15.0429	3.82617	0.25435	14.1838	0	0
56	30263	NM_006461_at	30262	15.0049	2.65833	0.177164	6.31301	0	0
57	23901	NM_001032999_at	23900	14.9736	2.23542	0.149291	4.70901	0	0
58	24696	NM_001042762_at	24695	14.9439	2.29112	0.153314	4.89435	0	0
59	35974	NM_022116_at	35973	14.9439	2.29112	0.153314	4.89435	0	0
60	38219	NM_032997_at	38218	14.9377	2.3667	0.158438	5.15761	0	0
61	23738	NM_001029989_at	23737	14.9004	3.16433	0.212365	8.96517	0	0
62	34559	NM_018492_at	34558	14.8865	3.92584	0.263718	15.1983	0	0
63	50107	XM_932109_at	50106	14.8236	2.08316	0.14053	4.23733	0	0
64	51754	XM_943379_at	51753	14.8236	2.08316	0.14053	4.23733	0	0
65	26104	NM_001975_at	26103	14.8149	2.52754	0.170607	5.76586	0	0
66	42358	NM_178014_at	42357	14.8114	1.80013	0.121537	3.48252	0	0
67	34200	NM_018087_at	34199	14.7637	1.94959	0.132053	3.86265	0	0
68	30149	NM_006341_at	30148	14.7335	1.91794	0.130176	3.77884	0	0
69	35389	NM_020818_at	35388	14.7271	3.07501	0.2088	8.42697	0	0
70	31290	NM_012310_at	31289	14.6955	3.04364	0.207113	8.24571	0	0
71	29678	NM_005826_at	29677	14.6923	1.81543	0.123564	3.51965	0	0
72	30808	NM_007057_at	30807	14.6556	2.40652	0.164205	5.30194	0	0
73	28788	NM_004856_at	28787	14.6523	3.01268	0.205611	8.07061	0	0
74	43088	NM_182776_at	43087	14.6363	2.36652	0.161688	5.15695	0	0
75	22422	NM_001005413_at	22421	14.6012	2.37535	0.162681	5.18862	0	0
76	27530	NM_003511_at	27529	14.5824	3.39921	0.233104	10.5503	0	0
77	31071	NM_007370_at	31070	14.5758	2.38298	0.163488	5.21613	0	0
78	30512	NM_006733_at	30511	14.5639	3.33397	0.22892	10.0838	0	0
79	39578	NM_138555_at	39577	14.5572	2.95949	0.203301	7.7785	0	0
80	32202	NM_014708_at	32201	14.5039	3.12852	0.215701	8.74534	0	0
81	35290	NM_020685_at	35289	14.4661	2.98179	0.206123	7.89968	0	0
82	44874	NR_002564_at	44873	14.4385	2.64662	0.183303	6.26199	0	0
83	32650	NM_015257_at	32649	14.4339	2.27855	0.157861	4.8519	0	0
84	25480	NM_001274_at	25479	14.4327	3.35963	0.232779	10.2648	0	0
85	36039	NM_022346_at	36038	14.4198	3.19708	0.221714	9.17098	0	0
86	33266	NM_016195_at	33265	14.4137	1.694	0.117527	3.23553	0	0
87	30618	NM_006845_at	30617	14.3876	3.18928	0.221669	9.12155	0	0
88	29762	NM_005916_at	29761	14.3681	2.34871	0.163467	5.0937	0	0
89	26487	NM_002388_at	26486	14.3401	2.38311	0.166185	5.21661	0	0
90	42711	NM_181578_at	42710	14.2675	2.31169	0.162025	4.96465	0	0
91	28300	NM_004336_at	28299	14.2527	3.12815	0.219478	8.74313	0	0
92	44875	NR_002565_at	44874	14.2294	2.15227	0.151255	4.44528	0	0
93	27537	NM_003520_at	27536	14.1616	1.8537	0.130896	3.61426	0	0
94	29451	NM_005573_at	29450	14.1604	3.16389	0.223433	8.9624	0	0
95	31123	NM_012112_at	31122	14.1393	4.20874	0.297662	18.4909	0	0
96	34309	NM_018204_at	34308	14.1241	3.15601	0.223449	8.9136	0	0
97	24607	NM_001042517_at	24606	14.0481	1.93135	0.137482	3.81412	0	0
98	36670	NM_024650_at	36669	14.0248	1.74997	0.124777	3.36352	0	0
99	22713	NM_001008396_at	22712	14.0205	2.88717	0.205925	7.39817	0	0
100	22423	NM_001005414_at	22422	14.0203	2.1942	0.156502	4.57636	0	0
101	42341	NM_177989_at	42340	14.0013	2.60971	0.186391	6.10382	0	0
102	27550	NM_003533_at	27549	13.9839	4.18495	0.29927	18.1884	0	0
103	37264	NM_030932_at	37263	13.9687	1.98521	0.142118	3.95921	0	0
104	33927	NM_017760_at	33926	13.9525	3.06611	0.219754	8.37514	0	0
105	30833	NM_007086_at	30832	13.8968	2.84231	0.20453	7.17166	0	0
106	30478	NM_006695_at	30477	13.8962	2.02707	0.145873	4.07578	0	0
107	42368	NM_178042_at	42367	13.8919	2.37176	0.170729	5.17573	0	0
108	31732	NM_014109_at	31731	13.8792	2.94521	0.212203	7.70189	0	0
109	23276	NM_001014809_at	23275	13.8705	2.81901	0.203237	7.05678	0	0
110	28268	NM_004301_at	28267	13.8646	2.50949	0.180999	5.69417	0	0
111	34261	NM_018151_at	34260	13.8552	1.70521	0.123074	3.26077	0	0
112	34246	NM_018136_at	34245	13.8549	3.5165	0.253809	11.4439	0	0
113	38745	NM_053024_at	38744	13.7872	3.21645	0.233292	9.29498	0	0
114	34071	NM_017922_at	34070	13.7746	1.58927	0.115376	3.00896	0	0
115	27543	NM_003526_at	27542	13.7318	2.5047	0.182402	5.67531	0	0
116	36001	NM_022145_at	36000	13.7253	3.07615	0.224123	8.43364	0	0
117	23359	NM_001017420_at	23358	13.7244	2.92	0.21276	7.56846	0	0
118	24510	NM_001040875_at	24509	13.6935	3.19282	0.233164	9.14393	0	0
119	36191	NM_022757_at	36190	13.6772	2.28782	0.167273	4.88319	0	0
120	28664	NM_004725_at	28663	13.6673	1.88525	0.137938	3.69417	0	0
121	34214	NM_018101_at	34213	13.6506	2.15468	0.157845	4.4527	0	0
122	21540	NM_000819_at	21539	13.5872	1.6581	0.122034	3.15601	0	0
123	33398	NM_016359_at	33397	13.5833	3.89841	0.286999	14.912	0	0
124	34529	NM_018454_at	34528	13.5833	3.89841	0.286999	14.912	0	0
125	42828	NM_181801_at	42827	13.556	4.46352	0.329265	22.0625	0	0
126	40737	NM_152446_at	40736	13.5361	1.88805	0.139482	3.70135	0	0
127	25963	NM_001827_at	25962	13.5281	3.20139	0.236648	9.19843	0	0
128	28406	NM_004450_at	28405	13.5023	1.88486	0.139595	3.69318	0	0
129	33949	NM_017785_at	33948	13.4678	2.22788	0.165423	4.68445	0	0
130	32278	NM_014791_at	32277	13.4677	3.63029	0.269554	12.383	0	0
131	28468	NM_004515_at	28467	13.4488	1.91671	0.142519	3.7756	0	0
132	28479	NM_004526_at	28478	13.4354	2.36959	0.176369	5.16794	0	0
133	33538	NM_016556_at	33537	13.4271	2.12326	0.158133	4.35678	0	0
134	34754	NM_018972_at	34753	13.3892	3.10687	0.232044	8.61512	0	0
135	54869	XR_018160_at	54868	13.3871	1.71743	0.12829	3.28851	0	0
136	27536	NM_003519_at	27535	13.3786	2.49068	0.186169	5.62042	0	0
137	29217	NM_005321_at	29216	13.3152	1.92841	0.144828	3.80635	0	0
138	36905	NM_024945_at	36904	13.2828	2.56308	0.192963	5.9097	0	0
139	36165	NM_022726_at	36164	13.2079	2.79691	0.211761	6.94951	0	0
140	28190	NM_004219_at	28189	13.2059	3.17829	0.240672	9.05232	0	0
141	35282	NM_020675_at	35281	13.2053	3.29509	0.249528	9.8157	0	0
142	35656	NM_021190_at	35655	13.1786	2.11922	0.160807	4.34458	0	0
143	21660	NM_000946_at	21659	13.1729	2.63198	0.199803	6.19878	0	0
144	22679	NM_001007793_at	22678	13.1538	1.82198	0.138514	3.53567	0	0
145	29798	NM_005956_at	29797	13.151	1.87475	0.142557	3.66739	0	0
146	25261	NM_001081640_at	25260	13.1468	1.79279	0.136367	3.46483	0	0
147	43066	NM_182746_at	43065	13.1409	2.76879	0.210699	6.81534	0	0
148	25444	NM_001237_at	25443	13.133	2.97711	0.22669	7.87406	0	0
149	30675	NM_006904_at	30674	13.1308	1.79242	0.136505	3.46395	0	0
150	46664	XM_001129414_at	46663	13.1162	1.78364	0.135988	3.44295	0	0
151	31853	NM_014288_at	31852	13.0983	3.01717	0.230347	8.09579	0	0
152	36878	NM_024908_at	36877	13.0968	2.83544	0.216498	7.13759	0	0
153	37865	NM_032458_at	37864	13.0221	2.37343	0.182262	5.18172	0	0
154	25762	NM_001617_at	25761	13.0135	2.11644	0.162634	4.33622	0	0
155	25420	NM_001211_at	25419	13.012	3.26537	0.250952	9.61558	0	0
156	25902	NM_001762_at	25901	12.9973	2.14941	0.165373	4.43646	0	0
157	44864	NR_002448_at	44863	12.9719	1.83101	0.141151	3.55785	0	0
158	22813	NM_001009186_at	22812	12.9273	2.14375	0.165832	4.41909	0	0
159	29760	NM_005914_at	29759	12.9262	2.68314	0.207574	6.42252	0	0
160	23483	NM_001018112_at	23482	12.8987	3.27862	0.254183	9.70425	0	0
161	44870	NR_002560_at	44869	12.8863	2.69355	0.209024	6.46901	0	0
162	42388	NM_178151_at	42387	12.8852	4.4276	0.34362	21.5199	0	0
163	40170	NM_145061_at	40169	12.8638	2.16243	0.168102	4.47668	0	0
164	37320	NM_031217_at	37319	12.8624	2.46699	0.191798	5.5289	0	0
165	50049	XM_931557_at	50048	12.8564	1.95364	0.151958	3.8735	0	0
166	52130	XM_946180_at	52129	12.8564	1.95364	0.151958	3.8735	0	0
167	39639	NM_138720_at	39638	12.8564	2.60811	0.202864	6.09705	0	0
168	43881	NM_199249_at	43880	12.84	1.99259	0.155186	3.9795	0	0
169	33720	NM_017483_at	33719	12.8272	2.18822	0.170592	4.55743	0	0
170	31128	NM_012117_at	31127	12.8092	1.87343	0.146256	3.66402	0	0
171	23318	NM_001015877_at	23317	12.7805	2.35815	0.184512	5.12713	0	0
172	23939	NM_001033506_at	23938	12.7748	1.94462	0.152223	3.84937	0	0
173	42389	NM_178152_at	42388	12.7742	4.42031	0.346034	21.4115	0	0
174	42390	NM_178153_at	42389	12.7742	4.42031	0.346034	21.4115	0	0
175	39155	NM_130398_at	39154	12.7731	3.27616	0.256489	9.68776	0	0
176	27876	NM_003878_at	27875	12.7504	2.93518	0.230203	7.64853	0	0
177	23938	NM_001033505_at	23937	12.7327	2.03311	0.159676	4.09286	0	0
178	35553	NM_021058_at	35552	12.7254	2.33673	0.183627	5.05156	0	0
179	32323	NM_014849_at	32322	12.6973	1.8578	0.146315	3.62455	0	0
180	29843	NM_006009_at	29842	12.6955	1.95787	0.154218	3.88489	0	0
181	25462	NM_001255_at	25461	12.6786	3.69744	0.291629	12.973	0	0
182	26719	NM_002628_at	26718	12.6694	2.96181	0.233776	7.79102	0	0
183	33722	NM_017488_at	33721	12.6543	2.0085	0.158721	4.02365	0	0
184	42827	NM_181800_at	42826	12.6499	4.0729	0.321972	16.8293	0	0
185	40046	NM_144711_at	40045	12.6432	2.26174	0.17889	4.79571	0	0
186	30771	NM_007019_at	30770	12.641	4.169	0.329799	17.9885	0	0
187	23010	NM_001012271_at	23009	12.6378	1.99046	0.1575	3.97363	0	0
188	25383	NM_001168_at	25382	12.6378	1.99046	0.1575	3.97363	0	0
189	45398	XM_001126107_at	45397	12.632	1.60854	0.127338	3.04942	0	0
190	27694	NM_003686_at	27693	12.5981	3.36084	0.266774	10.2734	0	0
191	29860	NM_006027_at	29859	12.5981	3.36084	0.266774	10.2734	0	0
192	31493	NM_013290_at	31492	12.5963	1.88924	0.149984	3.7044	0	0
193	33192	NM_016095_at	33191	12.5776	2.55025	0.202761	5.85734	0	0
194	26252	NM_002129_at	26251	12.5607	2.98033	0.237274	7.89167	0	0
195	26460	NM_002358_at	26459	12.5597	1.89311	0.150729	3.71436	0	0
196	31011	NM_007298_at	31010	12.5176	2.0247	0.161749	4.06908	0	0
197	31015	NM_007303_at	31014	12.4878	1.97269	0.15797	3.92501	0	0
198	31432	NM_012485_at	31431	12.4708	1.86308	0.149395	3.63783	0	0
199	31017	NM_007305_at	31016	12.462	2.06585	0.165771	4.1868	0	0
200	30874	NM_007145_at	30873	12.4478	2.10631	0.169211	4.30587	0	0
201	48711	XM_045911_at	48710	12.4443	3.22251	0.258955	9.33409	0	0
202	50907	XM_938898_at	50906	12.4443	3.22251	0.258955	9.33409	0	0
203	31013	NM_007300_at	31012	12.4176	1.98629	0.159958	3.96217	0	0
204	43882	NM_199250_at	43881	12.4152	2.04087	0.164385	4.11495	0	0
205	31016	NM_007304_at	31015	12.3875	2.00961	0.162229	4.02673	0	0
206	32247	NM_014756_at	32246	12.3559	1.92994	0.156196	3.81039	0	0
207	43762	NM_198947_at	43761	12.3535	3.94627	0.319446	15.415	0	0
208	35914	NM_022045_at	35913	12.3493	1.89112	0.153135	3.70923	0	0
209	33935	NM_017769_at	33934	12.3488	2.09539	0.169684	4.27343	0	0
210	32271	NM_014783_at	32270	12.3307	3.36417	0.272829	10.2971	0	0
211	31012	NM_007299_at	31011	12.3237	1.99617	0.161978	3.9894	0	0
212	22805	NM_001008938_at	22804	12.3149	1.94062	0.157583	3.8387	0	0
213	31014	NM_007302_at	31013	12.3114	2.03323	0.165149	4.0932	0	0
214	32345	NM_014875_at	32344	12.2964	2.76359	0.224747	6.79085	0	0
215	23484	NM_001018113_at	23483	12.2828	2.08638	0.169861	4.2468	0	0
216	31007	NM_007294_at	31006	12.2727	1.99216	0.162325	3.97833	0	0
217	31009	NM_007296_at	31008	12.2727	1.99216	0.162325	3.97833	0	0
218	31008	NM_007295_at	31007	12.2718	1.99685	0.162718	3.99126	0	0
219	48485	XM_001134002_at	48484	12.2638	2.5323	0.206486	5.78492	0	0
220	36840	NM_024857_at	36839	12.2588	2.61249	0.213112	6.11559	0	0
221	26515	NM_002417_at	26514	12.2416	3.4634	0.282921	11.0303	0	0
222	39128	NM_080911_at	39127	12.2227	2.17561	0.177998	4.51776	0	0
223	22792	NM_001008800_at	22791	12.221	1.74854	0.143076	3.36017	0	0
224	40888	NM_152633_at	40887	12.2187	2.16551	0.177228	4.48625	0	0
225	36210	NM_022778_at	36209	12.1916	1.85777	0.152382	3.62448	0	0
226	24742	NM_001048166_at	24741	12.1787	2.80009	0.229917	6.96482	0	0
227	27105	NM_003035_at	27104	12.1787	2.80009	0.229917	6.96482	0	0
228	27546	NM_003529_at	27545	12.1566	3.17157	0.260893	9.01028	0	0
229	22783	NM_001008744_at	22782	12.1559	1.92779	0.158589	3.80471	0	0
230	21310	NM_000555_at	21309	12.1547	4.03692	0.332128	16.4147	0	0
231	25097	NM_001080449_at	25096	12.1516	2.47951	0.204048	5.57706	0	0
232	50857	XM_938629_at	50856	12.1516	2.47951	0.204048	5.57706	0	0
233	36412	NM_024056_at	36411	12.1422	2.17353	0.179006	4.51127	0	0
234	25554	NM_001357_at	25553	12.136	1.66532	0.137221	3.17183	0	0
235	55183	XR_018481_at	55182	12.1197	3.13086	0.258329	8.75956	0	0
236	37770	NM_032335_at	37769	12.1075	2.04359	0.168788	4.12271	0	0
237	44872	NR_002562_at	44871	12.1039	2.5625	0.211709	5.90731	0	0
238	31010	NM_007297_at	31009	12.1027	1.96127	0.162052	3.89405	0	0
239	29098	NM_005192_at	29097	12.0518	2.59801	0.215571	6.05453	0	0
240	25516	NM_001313_at	25515	12.0453	2.50448	0.207921	5.67444	0	0
241	30254	NM_006452_at	30253	12.0444	2.16962	0.180136	4.49905	0	0
242	34625	NM_018685_at	34624	12.0343	3.23789	0.269055	9.43411	0	0
243	42081	NM_175065_at	42080	12.0258	2.56442	0.213244	5.91517	0	0
244	27554	NM_003537_at	27553	12.0217	4.4053	0.366445	21.1898	0	0
245	35335	NM_020750_at	35334	12.0056	1.67651	0.139643	3.19653	0	0
246	26968	NM_002893_at	26967	12.0008	1.79101	0.14924	3.46056	0	0
247	50506	XM_936790_at	50505	11.9958	1.6166	0.134764	3.06652	0	0
248	32463	NM_015013_at	32462	11.9935	2.01984	0.168411	4.05539	0	0
249	43929	NM_199357_at	43928	11.9871	3.63029	0.30285	12.383	0	0
250	27392	NM_003362_at	27391	11.9836	2.10059	0.175288	4.28884	0	0
251	26383	NM_002266_at	26382	11.9738	2.98412	0.249222	7.91244	0	0
252	29962	NM_006143_at	29961	11.9642	1.63174	0.136385	3.09887	0	0
253	48586	XM_001134299_at	48585	11.9176	2.08391	0.174859	4.23954	0	0
254	22796	NM_001008883_at	22795	11.917	1.78625	0.149891	3.44917	0	0
255	29833	NM_005998_at	29832	11.917	1.78625	0.149891	3.44917	0	0
256	26529	NM_002431_at	26528	11.9149	1.72579	0.144843	3.30762	0	0
257	30918	NM_007192_at	30917	11.9067	2.03554	0.170957	4.09976	0	0
258	34220	NM_018108_at	34219	11.906	1.8957	0.159222	3.72103	0	0
259	33719	NM_017482_at	33718	11.8997	1.75056	0.14711	3.3649	0	0
260	20953	NM_000179_at	20952	11.8944	2.3977	0.201583	5.26963	0	0
261	26772	NM_002692_at	26771	11.8916	2.45553	0.206493	5.48516	0	0
262	23356	NM_001017415_at	23355	11.8879	2.53331	0.213099	5.78897	0	0
263	34298	NM_018193_at	34297	11.8825	3.14261	0.264473	8.83122	0	0
264	34410	NM_018319_at	34409	11.879	1.87987	0.158252	3.68043	0	0
265	29929	NM_006101_at	29928	11.8733	3.14603	0.264967	8.85214	0	0
266	24961	NM_001079524_at	24960	11.8602	1.9942	0.168142	3.98396	0	0
267	24962	NM_001079525_at	24961	11.8602	1.9942	0.168142	3.98396	0	0
268	43302	NM_194292_at	43301	11.8334	1.67888	0.141876	3.20179	0	0
269	31059	NM_007358_at	31058	11.8292	1.72779	0.146061	3.31219	0	0
270	23009	NM_001012270_at	23008	11.8227	1.84521	0.156073	3.59304	0	0
271	27531	NM_003512_at	27530	11.8094	1.82892	0.154869	3.5527	0	0
272	49756	XM_928701_at	49755	11.7844	1.63435	0.138687	3.10447	0	0
273	26590	NM_002497_at	26589	11.7773	2.1459	0.182206	4.42568	0	0
274	41845	NM_173582_at	41844	11.7507	2.01821	0.171752	4.05081	0	0
275	31431	NM_012484_at	31430	11.7216	1.728	0.14742	3.31268	0	0
276	34064	NM_017915_at	34063	11.6978	2.03828	0.174245	4.10756	0	0
277	40589	NM_152280_at	40588	11.6946	2.36183	0.201959	5.14021	0	0
278	23357	NM_001017416_at	23356	11.6862	2.62931	0.224993	6.1873	0	0
279	29598	NM_005733_at	29597	11.6576	2.52655	0.21673	5.76193	0	0
280	30281	NM_006479_at	30280	11.655	3.09284	0.265367	8.53172	0	0
281	36298	NM_023010_at	36297	11.654	1.86354	0.159905	3.63899	0	0
282	31833	NM_014264_at	31832	11.644	1.88708	0.162065	3.69886	0	0
283	38986	NM_080632_at	38985	11.6436	1.82539	0.156772	3.54402	0	0
284	30580	NM_006807_at	30579	11.6433	2.20496	0.189377	4.61063	0	0
285	27398	NM_003368_at	27397	11.6409	2.40565	0.206655	5.29875	0	0
286	30134	NM_006325_at	30133	11.6383	1.89486	0.162813	3.71885	0	0
287	27314	NM_003276_at	27313	11.6374	2.18131	0.187439	4.53564	0	0
288	27523	NM_003503_at	27522	11.6108	2.53433	0.218274	5.79306	0	0
289	42141	NM_175748_at	42140	11.5678	1.82488	0.157755	3.54278	0	0
290	29363	NM_005484_at	29362	11.5409	1.81946	0.157654	3.5295	0	0
291	21661	NM_000947_at	21660	11.528	1.88546	0.163555	3.69471	0	0
292	24658	NM_001042618_at	24657	11.5272	1.81768	0.157687	3.52514	0	0
293	36038	NM_022344_at	36037	11.5161	2.01263	0.174766	4.03517	0	0
294	27428	NM_003400_at	27427	11.5106	1.93448	0.16806	3.8224	0	0
295	27873	NM_003875_at	27872	11.4996	1.80438	0.156909	3.4928	0	0
296	32653	NM_015261_at	32652	11.4982	1.92035	0.167013	3.78516	0	0
297	42992	NM_182620_at	42991	11.4888	2.19481	0.191039	4.57828	0	0
298	24003	NM_001033_at	24002	11.4861	2.58179	0.224774	5.98681	0	0
299	40831	NM_152562_at	40830	11.4736	2.09904	0.182945	4.28425	0	0
300	21742	NM_001001436_at	21741	11.4545	1.78446	0.155788	3.44491	0	0
301	27914	NM_003920_at	27913	11.4539	2.58184	0.225412	5.98701	0	0
302	28092	NM_004111_at	28091	11.4177	1.87881	0.164552	3.67771	0	0
303	34474	NM_018392_at	34473	11.399	1.74703	0.153261	3.35666	0	0
304	30202	NM_006397_at	30201	11.3533	2.14561	0.188985	4.4248	0	0
305	36027	NM_022173_at	36026	11.3531	1.81724	0.160066	3.52406	0	0
306	42496	NM_178517_at	42495	11.3293	1.91384	0.168928	3.76812	0	0
307	35909	NM_022037_at	35908	11.329	1.83275	0.161774	3.56214	0	0
308	32781	NM_015434_at	32780	11.302	2.26636	0.200528	4.81107	0	0
309	31126	NM_012115_at	31125	11.3016	1.63913	0.145035	3.11478	0	0
310	39730	NM_138967_at	39729	11.2918	1.65574	0.146632	3.15085	0	0
311	30802	NM_007051_at	30801	11.2726	1.64345	0.145792	3.12413	0	0
312	34211	NM_018098_at	34210	11.2712	2.94615	0.261388	7.70692	0	0
313	26767	NM_002687_at	26766	11.2465	1.69723	0.150913	3.24279	0	0
314	31882	NM_014321_at	31881	11.2449	2.28611	0.203301	4.87738	0	0
315	35463	NM_020931_at	35462	11.2387	1.63497	0.145476	3.1058	0	0
316	27136	NM_003071_at	27135	11.2263	2.09321	0.186455	4.26696	0	0
317	43943	NM_199420_at	43942	11.2083	2.28766	0.204105	4.88265	0	0
318	34234	NM_018124_at	34233	11.2034	1.72552	0.154017	3.30698	0	0
319	42830	NM_181803_at	42829	11.2027	3.70402	0.330636	13.0323	0	0
320	28950	NM_005030_at	28949	11.2026	2.84252	0.253738	7.17272	0	0
321	33603	NM_016631_at	33602	11.1892	1.67622	0.149806	3.19589	0	0
322	48453	XM_001133901_at	48452	11.1815	2.14696	0.192009	4.42893	0	0
323	48456	XM_001133924_at	48455	11.1815	2.14696	0.192009	4.42893	0	0
324	25929	NM_001790_at	25928	11.1698	1.88147	0.168444	3.68452	0	0
325	34728	NM_018944_at	34727	11.1649	1.74945	0.156692	3.36232	0	0
326	38028	NM_032727_at	38027	11.1523	4.17553	0.374409	18.0701	0	0
327	33455	NM_016448_at	33454	11.1453	3.32093	0.297968	9.99306	0	0
328	22726	NM_001008489_at	22725	11.1421	1.68111	0.150878	3.20674	0	0
329	23491	NM_001018159_at	23490	11.1406	1.78472	0.1602	3.4455	0	0
330	39777	NM_139048_at	39776	11.1325	2.07247	0.186164	4.20605	0	0
331	33674	NM_017412_at	33673	11.108	2.54713	0.229305	5.84469	0	0
332	48454	XM_001133902_at	48453	11.0958	1.99861	0.180123	3.99616	0	0
333	48457	XM_001133925_at	48456	11.0958	1.99861	0.180123	3.99616	0	0
334	35624	NM_021150_at	35623	11.0939	1.96804	0.177399	3.91237	0	0
335	23861	NM_001032283_at	23860	11.0905	2.28366	0.205911	4.86911	0	0
336	25763	NM_001618_at	25762	11.0818	2.07525	0.187268	4.21418	0	0
337	21201	NM_000436_at	21200	11.0807	1.6614	0.149936	3.16324	0	0
338	42783	NM_181716_at	42782	11.0799	2.6579	0.239885	6.31114	0	0
339	32721	NM_015355_at	32720	11.0768	2.11668	0.191092	4.33696	0	0
340	27532	NM_003513_at	27531	11.0343	2.42224	0.21952	5.36003	0	0
341	23492	NM_001018160_at	23491	11.034	1.80394	0.163489	3.49171	0	0
342	27901	NM_003905_at	27900	11.034	1.80394	0.163489	3.49171	0	0
343	36582	NM_024548_at	36581	11.0262	2.30638	0.209173	4.94639	0	0
344	28460	NM_004506_at	28459	11.0252	1.61828	0.146781	3.0701	0	0
345	23862	NM_001032284_at	23861	10.9974	2.28809	0.208058	4.8841	0	0
346	27559	NM_003543_at	27558	10.9862	2.11255	0.192291	4.32456	0	0
347	32580	NM_015161_at	32579	10.9836	1.91011	0.173905	3.75838	0	0
348	33850	NM_017666_at	33849	10.9698	1.72325	0.15709	3.30179	0	0
349	31037	NM_007331_at	31036	10.969	1.77832	0.162122	3.43025	0	0
350	34241	NM_018131_at	34240	10.9458	2.56767	0.234581	5.92852	0	0
351	23100	NM_001012756_at	23099	10.9219	2.00174	0.183278	4.00483	0	0
352	54095	XR_017284_at	54094	10.9199	1.85112	0.169518	3.60781	0	0
353	55819	XR_019133_at	55818	10.9199	1.85112	0.169518	3.60781	0	0
354	24798	NM_001071_at	24797	10.9013	3.86223	0.35429	14.5428	0	0
355	33806	NM_017613_at	33805	10.8735	2.17884	0.20038	4.5279	0	0
356	23029	NM_001012409_at	23028	10.8726	2.4852	0.228574	5.59913	0	0
357	27524	NM_003504_at	27523	10.8532	2.14931	0.198035	4.43615	0	0
358	27198	NM_003137_at	27197	10.8394	1.84526	0.170236	3.59316	0	0
359	35556	NM_021063_at	35555	10.8267	2.85313	0.263526	7.22568	0	0
360	26079	NM_001948_at	26078	10.8238	1.78554	0.164965	3.44749	0	0
361	26380	NM_002263_at	26379	10.7993	2.39717	0.221975	5.2677	0	0
362	48718	XM_048070_at	48717	10.7967	1.61159	0.149267	3.05588	0	0
363	29761	NM_005915_at	29760	10.7913	2.70318	0.250496	6.51236	0	0
364	29534	NM_005662_at	29533	10.7735	1.68369	0.15628	3.21248	0	0
365	27529	NM_003510_at	27528	10.764	2.41765	0.224606	5.34299	0	0
366	48011	XM_001132721_at	48010	10.7601	2.6903	0.250025	6.45447	0	0
367	27534	NM_003517_at	27533	10.7336	1.65235	0.153942	3.14346	0	0
368	30975	NM_007259_at	30974	10.7321	1.72145	0.160402	3.29767	0	0
369	46583	XM_001129198_at	46582	10.7306	2.05165	0.191196	4.1458	0	0
370	30236	NM_006431_at	30235	10.7085	2.00847	0.187558	4.02355	0	0
371	50846	XM_938563_at	50845	10.698	1.61275	0.150753	3.05835	0	0
372	39290	NM_133334_at	39289	10.6838	1.79832	0.168322	3.47815	0	0
373	29324	NM_005441_at	29323	10.6831	2.13946	0.200267	4.40597	0	0
374	23031	NM_001012411_at	23030	10.6791	2.45098	0.229511	5.46786	0	0
375	37696	NM_032237_at	37695	10.6709	1.76909	0.165786	3.40839	0	0
376	33023	NM_015895_at	33022	10.6617	2.47464	0.232105	5.55827	0	0
377	39520	NM_138421_at	39519	10.6571	1.89691	0.177994	3.72414	0	0
378	33940	NM_017774_at	33939	10.646	2.55264	0.239774	5.86705	0	0
379	34231	NM_018120_at	34230	10.6368	1.63247	0.153473	3.10042	0	0
380	36469	NM_024122_at	36468	10.6337	1.95201	0.183568	3.86914	0	0
381	37792	NM_032358_at	37791	10.6145	1.61486	0.152137	3.06281	0	0
382	23659	NM_001025249_at	23658	10.6051	1.63168	0.153858	3.09874	0	0
383	39727	NM_138962_at	39726	10.6003	2.26814	0.213969	4.817	0	0
384	35396	NM_020826_at	35395	10.5995	2.23541	0.210897	4.70897	0	0
385	26683	NM_002592_at	26682	10.5993	2.82813	0.266823	7.10155	0	0
386	34774	NM_018997_at	34773	10.584	1.61653	0.152734	3.06637	0	0
387	29328	NM_005445_at	29327	10.5819	1.89685	0.179254	3.72399	0	0
388	23033	NM_001012413_at	23032	10.5793	2.36459	0.22351	5.15005	0	0
389	30706	NM_006938_at	30705	10.5629	1.99761	0.189115	3.99338	0	0
390	30378	NM_006585_at	30377	10.5627	1.65275	0.156471	3.14433	0	0
391	25950	NM_001813_at	25949	10.5569	1.85593	0.175803	3.61985	0	0
392	27591	NM_003579_at	27590	10.5358	1.70838	0.16215	3.26794	0	0
393	36229	NM_022809_at	36228	10.5317	1.69978	0.161396	3.2485	0	0
394	35697	NM_021238_at	35696	10.5297	2.60778	0.247661	6.09565	0	0
395	33721	NM_017484_at	33720	10.5214	1.62764	0.154698	3.09008	0	0
396	28155	NM_004181_at	28154	10.5146	4.12652	0.392456	17.4665	0	0
397	43013	NM_182649_at	43012	10.484	2.90277	0.276877	7.47862	0	0
398	42826	NM_181799_at	42825	10.4758	3.20388	0.305834	9.21431	0	0
399	43647	NM_198566_at	43646	10.4727	1.99465	0.190461	3.98518	0	0
400	46732	XM_001129608_at	46731	10.4715	2.01154	0.192096	4.03212	0	0
401	26141	NM_002013_at	26140	10.4683	1.81359	0.173246	3.51515	0	0
402	29819	NM_005983_at	29818	10.4672	2.06479	0.197264	4.18373	0	0
403	25702	NM_001527_at	25701	10.4556	1.98503	0.189852	3.9587	0	0
404	25560	NM_001363_at	25559	10.4517	2.18081	0.208656	4.53409	0	0
405	30591	NM_006818_at	30590	10.4463	3.99558	0.382486	15.951	0	0
406	32678	NM_015294_at	32677	10.4457	1.81001	0.173277	3.50644	0	0
407	26989	NM_002915_at	26988	10.4253	2.51134	0.240889	5.70151	0	0
408	29295	NM_005412_at	29294	10.4148	1.90115	0.182543	3.7351	0	0
409	24033	NM_001034_at	24032	10.4062	3.17321	0.304933	9.02051	0	0
410	45132	NR_003105_at	45131	10.4021	1.97425	0.189794	3.92924	0	0
411	34454	NM_018369_at	34453	10.3973	2.70055	0.259737	6.50049	0	0
412	43170	NM_182976_at	43169	10.3955	1.67312	0.160946	3.18903	0	0
413	29558	NM_005687_at	29557	10.388	1.69451	0.163121	3.23667	0	0
414	42829	NM_181802_at	42828	10.3841	2.66124	0.256281	6.32575	0	0
415	44869	NR_002559_at	44868	10.3799	1.80866	0.174247	3.50317	0	0
416	33017	NM_015888_at	33016	10.3798	2.51903	0.242684	5.73195	0	0
417	34108	NM_017975_at	34107	10.3798	1.99687	0.192381	3.99134	0	0
418	41455	NM_170721_at	41454	10.3623	2.39265	0.230899	5.2512	0	0
419	44873	NR_002563_at	44872	10.3473	2.41103	0.23301	5.31854	0	0
420	42666	NM_181471_at	42665	10.346	2.02448	0.195677	4.06845	0	0
421	30761	NM_007007_at	30760	10.327	1.75501	0.169943	3.37529	0	0
422	28265	NM_004298_at	28264	10.3265	2.24596	0.217493	4.74352	0	0
423	37273	NM_030941_at	37272	10.3238	1.84067	0.178295	3.58176	0	0
424	31176	NM_012177_at	31175	10.3179	2.8094	0.272284	7.00992	0	0
425	35073	NM_020242_at	35072	10.3165	2.3618	0.228934	5.14011	0	0
426	37995	NM_032637_at	37994	10.3124	2.03778	0.197606	4.10614	0	0
427	22340	NM_001005207_at	22339	10.3115	1.7622	0.170897	3.39216	0	0
428	27120	NM_003051_at	27119	10.3107	2.21529	0.214853	4.64374	0	0
429	34524	NM_018448_at	34523	10.3018	1.95921	0.190181	3.88849	0	0
430	37615	NM_032118_at	37614	10.3012	1.65491	0.160652	3.14904	0	0
431	41290	NM_153485_at	41289	10.2912	2.22902	0.216596	4.68817	0	0
432	26988	NM_002914_at	26987	10.2846	1.97984	0.192506	3.9445	0	0
433	31776	NM_014191_at	31775	10.278	2.21244	0.215259	4.63457	0	0
434	32374	NM_014906_at	32373	10.2736	1.9214	0.187024	3.78791	0	0
435	38442	NM_033319_at	38441	10.2676	1.89008	0.184082	3.70656	0	0
436	26769	NM_002689_at	26768	10.2374	1.93968	0.189469	3.8362	0	0
437	38721	NM_052969_at	38720	10.2294	1.83877	0.179754	3.57704	0	0
438	36750	NM_024745_at	36749	10.2126	1.91192	0.187211	3.76309	0	0
439	40779	NM_152496_at	40778	10.2018	2.2878	0.224254	4.8831	0	0
440	39265	NM_133259_at	39264	10.1981	1.7224	0.168893	3.29984	0	0
441	21978	NM_001002838_at	21977	10.1909	2.43589	0.239025	5.41099	0	0
442	29917	NM_006089_at	29916	10.1639	2.53439	0.249352	5.79331	0	0
443	27402	NM_003372_at	27401	10.1608	2.23561	0.220022	4.70961	0	0
444	46857	XM_001129908_at	46856	10.1568	1.65766	0.163207	3.15505	0	0
445	30778	NM_007027_at	30777	10.1556	2.22583	0.219173	4.67779	0	0
446	36652	NM_024629_at	36651	10.1455	2.8803	0.283901	7.36305	0	0
447	33864	NM_017681_at	33863	10.1393	2.17522	0.214533	4.51655	0	0
448	40794	NM_152515_at	40793	10.1315	2.29685	0.226704	4.91385	0	0
449	27382	NM_003350_at	27381	10.1241	1.65169	0.163143	3.14201	0	0
450	30235	NM_006430_at	30234	10.1237	1.60344	0.158386	3.03868	0	0
451	42707	NM_181558_at	42706	10.1236	2.42104	0.239149	5.35558	0	0
452	39568	NM_138484_at	39567	10.1165	1.98192	0.19591	3.95019	0	0
453	27158	NM_003094_at	27157	10.0958	1.72624	0.170986	3.30865	0	0
454	30992	NM_007276_at	30991	10.0947	2.28336	0.226194	4.86812	0	0
455	23030	NM_001012410_at	23029	10.0857	2.23934	0.222031	4.72181	0	0
456	23032	NM_001012412_at	23031	10.0832	2.11551	0.209804	4.33342	0	0
457	39009	NM_080668_at	39008	10.0832	1.96869	0.195245	3.91413	0	0
458	41558	NM_172164_at	41557	10.0601	1.91322	0.190179	3.7665	0	0
459	37881	NM_032485_at	37880	10.057	2.54209	0.252769	5.82434	0	0
460	34292	NM_018186_at	34291	10.0539	1.96348	0.195296	3.90001	0	0
461	35560	NM_021067_at	35559	10.0534	2.80603	0.279114	6.99357	0	0
462	23485	NM_001018115_at	23484	10.0462	1.68379	0.167605	3.21272	0	0
463	28439	NM_004485_at	28438	10.0434	3.23208	0.32181	9.3962	0	0
464	26575	NM_002482_at	26574	10.0311	1.9095	0.190358	3.7568	0	0
465	25931	NM_001792_at	25930	10.0288	4.08559	0.407386	16.978	0	0
466	38605	NM_052827_at	38604	10.0205	1.7945	0.179083	3.46895	0	0
467	23508	NM_001023561_at	23507	10.0196	2.12958	0.212541	4.37589	0	0
468	27562	NM_003546_at	27561	10.0164	1.60907	0.160644	3.05055	0	0
469	38278	NM_033084_at	38277	10.0098	1.63639	0.16348	3.10887	0	0
470	20909	NM_000135_at	20908	10.0074	2.13874	0.213716	4.40377	0	0
471	25816	NM_001673_at	25815	10.0052	2.27132	0.227013	4.82764	0	0
472	32548	NM_015120_at	32547	10.0015	1.6004	0.160015	3.03226	0	0
473	50046	XM_931515_at	50045	9.99578	1.69789	0.169861	3.24427	0	0
474	40603	NM_152298_at	40602	9.9865	1.92886	0.193147	3.80754	0	0
475	25937	NM_001798_at	25936	9.98619	1.85693	0.18595	3.62236	0	0
476	27712	NM_003707_at	27711	9.97843	1.63139	0.163491	3.0981	0	0
477	25962	NM_001826_at	25961	9.9748	2.19196	0.21975	4.56925	0	0
478	30043	NM_006231_at	30042	9.9722	1.73912	0.174396	3.33831	0	0
479	43099	NM_182802_at	43098	9.96371	2.49168	0.250075	5.62431	0	0
480	27414	NM_003384_at	27413	9.94669	2.85739	0.287271	7.24705	0	0
481	51652	XM_942628_at	51651	9.9332	2.04094	0.205467	4.11514	0	0
482	37728	NM_032290_at	37727	9.91437	1.96172	0.197866	3.89526	0	0
483	29043	NM_005131_at	29042	9.90723	1.8111	0.182806	3.50909	0	0
484	46431	XM_001128828_at	46430	9.90527	1.65207	0.166787	3.14283	0	0
485	46470	XM_001128919_at	46469	9.90527	1.65207	0.166787	3.14283	0	0
486	35457	NM_020922_at	35456	9.88077	2.33074	0.235886	5.03063	0	0
487	33566	NM_016587_at	33565	9.87409	2.11282	0.213976	4.32537	0	0
488	39652	NM_138736_at	39651	9.86733	2.20145	0.223105	4.59942	0	0
489	27454	NM_003428_at	27453	9.83487	1.62193	0.164916	3.07787	0	0
490	27560	NM_003544_at	27559	9.81972	2.52551	0.257188	5.75778	0	0
491	42812	NM_181781_at	42811	9.7849	1.61403	0.164951	3.06106	0	0
492	32335	NM_014865_at	32334	9.77466	1.99923	0.204532	3.99787	0	0
493	21038	NM_000269_at	21037	9.73826	1.89942	0.195047	3.73063	0	0
494	43548	NM_198435_at	43547	9.73715	3.03346	0.311535	8.18771	0	0
495	43550	NM_198437_at	43549	9.73715	3.03346	0.311535	8.18771	0	0
496	50882	XM_938779_at	50881	9.72646	2.16394	0.22248	4.48138	0	0
497	31449	NM_013243_at	31448	9.71558	3.69606	0.380426	12.9606	0	0
498	33438	NM_016424_at	33437	9.71228	1.66488	0.17142	3.17088	0	0
499	31684	NM_014021_at	31683	9.71065	2.29089	0.235915	4.89358	0	0
500	23830	NM_001031740_at	23829	9.70749	2.09345	0.215653	4.26769	0	0
501	27612	NM_003600_at	27611	9.70279	2.81029	0.289637	7.01424	0	0
502	56247	XR_019614_at	56246	9.6509	1.80836	0.187377	3.50243	0	0
503	43954	NM_199440_at	43953	9.64939	1.98937	0.206165	3.97063	0	0
504	34864	NM_019106_at	34863	9.62576	1.73358	0.180098	3.32552	0	0
505	28207	NM_004237_at	28206	9.62455	1.84477	0.191673	3.59195	0	0
506	31422	NM_012474_at	31421	9.61025	1.64935	0.171624	3.13691	0	0
507	43546	NM_198433_at	43545	9.6052	2.73011	0.284233	6.63507	0	0
508	30392	NM_006601_at	30391	9.5896	1.8458	0.192479	3.59452	0	0
509	33831	NM_017645_at	33830	9.5664	1.69591	0.177278	3.23981	0	0
510	31076	NM_007375_at	31075	9.56555	1.9009	0.198724	3.73447	0	0
511	26038	NM_001905_at	26037	9.56341	2.59396	0.271238	6.03753	0	0
512	43547	NM_198434_at	43546	9.56199	2.92771	0.306182	7.60899	0	0
513	43549	NM_198436_at	43548	9.56199	2.92771	0.306182	7.60899	0	0
514	35864	NM_021953_at	35863	9.54977	2.339	0.244928	5.05953	0	0
515	21971	NM_001002800_at	21970	9.54774	2.33095	0.244136	5.03135	0	0
516	44109	NM_202002_at	44108	9.53216	2.3181	0.243188	4.98676	0	0
517	25518	NM_001316_at	25517	9.52301	2.24432	0.235673	4.73813	0	0
518	29375	NM_005496_at	29374	9.51968	2.32515	0.244246	5.01117	0	0
519	35618	NM_021144_at	35617	9.51605	2.14175	0.225067	4.41296	0	0
520	26277	NM_002156_at	26276	9.51518	1.97846	0.207927	3.94072	0	0
521	46280	XM_001128444_at	46279	9.50952	1.66984	0.175596	3.18178	0	0
522	47748	XM_001132102_at	47747	9.50952	1.66984	0.175596	3.18178	0	0
523	30326	NM_006530_at	30325	9.50866	2.04419	0.214982	4.12442	0	0
524	35595	NM_021115_at	35594	9.49926	2.55761	0.269243	5.88732	0	0
525	38415	NM_033286_at	38414	9.4779	2.16768	0.228709	4.49299	0	0
526	22801	NM_001008897_at	22800	9.4772	1.69298	0.178637	3.23323	0	0
527	37160	NM_030752_at	37159	9.4772	1.69298	0.178637	3.23323	0	0
528	44930	NR_002742_at	44929	9.47628	1.83405	0.193541	3.56536	0	0
529	36498	NM_024322_at	36497	9.47433	2.16834	0.228865	4.49506	0	0
530	29378	NM_005499_at	29377	9.47304	1.59463	0.168334	3.02018	0	0
531	37253	NM_030920_at	37252	9.45011	2.14862	0.227364	4.43402	0	0
532	38636	NM_052865_at	38635	9.44786	1.62686	0.172194	3.08841	0	0
533	40360	NM_145733_at	40359	9.43643	1.7131	0.181541	3.27865	0	0
534	28066	NM_004085_at	28065	9.40613	2.05478	0.218451	4.15481	0	0
535	35969	NM_022111_at	35968	9.40001	2.55825	0.272153	5.88991	0	0
536	44110	NM_202003_at	44109	9.38937	2.31261	0.246301	4.96782	0	0
537	48584	XM_001134297_at	48583	9.38505	1.73786	0.185173	3.3354	0	0
538	34397	NM_018304_at	34396	9.3849	2.88638	0.307556	7.39411	0	0
539	34530	NM_018455_at	34529	9.37554	1.66287	0.177363	3.16647	0	0
540	39540	NM_138443_at	39539	9.37122	1.67586	0.178831	3.19511	0	0
541	51341	XM_941030_at	51340	9.3688	1.66633	0.177859	3.17406	0	0
542	43233	NM_183356_at	43232	9.36767	2.10238	0.22443	4.29418	0	0
543	25078	NM_001080430_at	25077	9.34371	1.6199	0.173368	3.07353	0	0
544	52009	XM_944953_at	52008	9.34371	1.6199	0.173368	3.07353	0	0
545	45485	XM_001126340_at	45484	9.34198	1.99346	0.213387	3.98191	0	0
546	46788	XM_001129759_at	46787	9.34198	1.99346	0.213387	3.98191	0	0
547	28473	NM_004520_at	28472	9.33302	1.68045	0.180055	3.20528	0	0
548	32709	NM_015341_at	32708	9.32397	1.95481	0.209654	3.87664	0	0
549	30851	NM_007111_at	30850	9.3231	1.8483	0.19825	3.60076	0	0
550	27555	NM_003538_at	27554	9.29186	2.1792	0.234528	4.52902	0	0
551	24299	NM_001039841_at	24298	9.29058	2.32787	0.250563	5.02065	0	0
552	40570	NM_152259_at	40569	9.28574	2.04988	0.220755	4.1407	0	0
553	29238	NM_005342_at	29237	9.28562	3.43399	0.369818	10.8077	0	0
554	40616	NM_152313_at	40615	9.28493	2.69489	0.290243	6.47504	0	0
555	39912	NM_144508_at	39911	9.28277	2.63912	0.284303	6.22952	0	0
556	34490	NM_018410_at	34489	9.27779	1.71139	0.184461	3.27476	0	0
557	41412	NM_170589_at	41411	9.27468	2.62496	0.283024	6.16867	0	0
558	21229	NM_000465_at	21228	9.26367	2.09713	0.226383	4.27859	0	0
559	27558	NM_003542_at	27557	9.23464	2.2965	0.248684	4.91265	0	0
560	38107	NM_032838_at	38106	9.22462	1.7381	0.18842	3.33596	0	0
561	44927	NR_002738_at	44926	9.22168	1.60321	0.173852	3.03818	0	0
562	34013	NM_017858_at	34012	9.20152	1.85033	0.201089	3.60582	0	0
563	21748	NM_001001483_at	21747	9.2	2.30379	0.250413	4.93755	0	0
564	34278	NM_018170_at	34277	9.19777	1.78493	0.194061	3.44601	0	0
565	34349	NM_018248_at	34348	9.18754	2.04346	0.222416	4.12232	0	0
566	34800	NM_019028_at	34799	9.17175	2.24233	0.244483	4.73162	0	0
567	32083	NM_014573_at	32082	9.16968	1.7339	0.18909	3.32626	0	0
568	43428	NM_198175_at	43427	9.16852	1.67963	0.183196	3.20346	0	0
569	44246	NM_203486_at	44245	9.16614	2.02723	0.221165	4.07623	0	0
570	32274	NM_014787_at	32273	9.15562	1.71255	0.187049	3.2774	0	0
571	24629	NM_001042550_at	24628	9.13654	2.54186	0.278208	5.8234	0	0
572	38844	NM_057749_at	38843	9.12979	3.56672	0.390668	11.8492	0	0
573	32070	NM_014554_at	32069	9.11605	1.77095	0.194267	3.41279	0	0
574	30955	NM_007235_at	30954	9.11012	1.74814	0.19189	3.35925	0	0
575	35507	NM_020988_at	35506	9.10656	2.35875	0.259017	5.12925	0	0
576	50170	XM_932922_at	50169	9.10216	1.81187	0.199059	3.51097	0	0
577	51691	XM_942909_at	51690	9.10216	1.81187	0.199059	3.51097	0	0
578	22882	NM_001010853_at	22881	9.09551	1.69198	0.186024	3.231	0	0
579	31707	NM_014053_at	31706	9.08433	1.62538	0.178921	3.08523	0	0
580	35362	NM_020784_at	35361	9.0768	1.93942	0.213668	3.83551	0	0
581	24630	NM_001042551_at	24629	9.07539	2.52077	0.277759	5.7389	0	0
582	30248	NM_006444_at	30247	9.07539	2.52077	0.277759	5.7389	0	0
583	24797	NM_001071775_at	24796	9.06929	1.88944	0.208334	3.70491	0	0
584	31299	NM_012319_at	31298	9.05322	1.79915	0.198731	3.48016	0	0
585	31497	NM_013296_at	31496	9.03935	2.08821	0.231014	4.25221	0	0
586	27349	NM_003316_at	27348	9.03627	1.88072	0.208131	3.6826	0	0
587	49683	XM_928075_at	49682	9.02539	1.6866	0.186873	3.21897	0	0
588	52031	XM_945078_at	52030	9.02539	1.6866	0.186873	3.21897	0	0
589	38843	NM_057735_at	38842	9.02226	3.44545	0.381883	10.8939	0	0
590	38375	NM_033222_at	38374	9.02112	2.20099	0.243982	4.59794	0	0
591	35159	NM_020401_at	35158	9.01081	1.91289	0.212288	3.76562	0	0
592	26685	NM_002594_at	26684	8.98771	3.01147	0.335065	8.06384	0	0
593	23156	NM_001013439_at	23155	8.98151	1.76466	0.196477	3.39795	0	0
594	21862	NM_001001894_at	21861	8.97327	1.86457	0.207791	3.64159	0	0
595	44859	NR_002437_at	44858	8.96969	1.93339	0.215547	3.81951	0	0
596	37951	NM_032574_at	37950	8.95814	1.70987	0.190873	3.27131	0	0
597	50909	XM_938906_at	50908	8.9538	2.35935	0.263503	5.13139	0	0
598	49198	XM_376062_at	49197	8.94092	1.67266	0.187079	3.18801	0	0
599	29215	NM_005319_at	29214	8.93844	2.07609	0.232265	4.21663	0	0
600	33554	NM_016575_at	33553	8.93107	2.06863	0.231621	4.19488	0	0
601	26842	NM_002764_at	26841	8.92853	1.72973	0.193731	3.31666	0	0
602	34470	NM_018387_at	34469	8.92047	2.11288	0.236857	4.32553	0	0
603	31091	NM_012073_at	31090	8.89141	1.61378	0.181499	3.06053	0	0
604	46507	XM_001129007_at	46506	8.88577	1.60561	0.180695	3.04324	0	0
605	29743	NM_005897_at	29742	8.88473	1.61293	0.181539	3.05872	0	0
606	23155	NM_001013438_at	23154	8.87968	1.76154	0.198379	3.39061	0	0
607	39218	NM_130811_at	39217	8.87868	2.3943	0.269669	5.25723	0	0
608	33243	NM_016157_at	33242	8.85092	1.87111	0.211403	3.65814	0	0
609	42309	NM_177556_at	42308	8.85092	1.87111	0.211403	3.65814	0	0
610	36660	NM_024639_at	36659	8.83495	1.92397	0.217768	3.79465	0	0
611	37665	NM_032180_at	37664	8.83377	2.05699	0.232855	4.16116	0	0
612	29314	NM_005431_at	29313	8.83321	2.3523	0.266302	5.10639	0	0
613	33660	NM_016941_at	33659	8.83034	1.8935	0.214431	3.71536	0	0
614	28475	NM_004522_at	28474	8.8245	3.40473	0.385827	10.5908	0	0
615	12155	4103299_at	12154	8.81513	2.12845	0.241454	4.37246	0	0
616	25947	NM_001809_at	25946	8.81459	1.97291	0.223823	3.92559	0	0
617	44928	NR_002739_at	44927	8.78893	2.16893	0.24678	4.49689	0	0
618	32412	NM_014946_at	32411	8.78302	1.58929	0.18095	3.00901	0	0
619	23398	NM_001017963_at	23397	8.78243	1.64865	0.187721	3.13539	0	0
620	45247	XM_001125694_at	45246	8.78007	3.41207	0.388615	10.6447	0	0
621	37848	NM_032437_at	37847	8.77916	1.72122	0.196058	3.29716	0	0
622	43950	NM_199436_at	43949	8.77742	1.58943	0.181082	3.0093	0	0
623	23053	NM_001012507_at	23052	8.73658	2.10437	0.240869	4.3001	0	0
624	30716	NM_006948_at	30715	8.71281	1.74471	0.200247	3.35129	0	0
625	39316	NM_133436_at	39315	8.7092	1.95731	0.22474	3.88336	0	0
626	29002	NM_005087_at	29001	8.70844	1.77555	0.203889	3.42369	0	0
627	42254	NM_176890_at	42253	8.70137	1.63545	0.187954	3.10685	0	0
628	29914	NM_006086_at	29913	8.69692	1.60486	0.184532	3.04167	0	0
629	44695	NR_000005_at	44694	8.68441	1.61907	0.186434	3.07177	0	0
630	24905	NM_001077511_at	24904	8.68188	2.24067	0.258086	4.72616	0	0
631	22504	NM_001005851_at	22503	8.68107	1.7897	0.206161	3.45743	0	0
632	36444	NM_024094_at	36443	8.67558	1.92959	0.222417	3.80948	0	0
633	30398	NM_006608_at	30397	8.65394	1.66777	0.192718	3.17724	0	0
634	45217	NR_003491_at	45216	8.64966	3.42299	0.395737	10.7257	0	0
635	30849	NM_007109_at	30848	8.6294	2.27591	0.26374	4.84305	0	0
636	42999	NM_182633_at	42998	8.62855	1.6997	0.196986	3.24834	0	0
637	35027	NM_020186_at	35026	8.60509	1.92256	0.223421	3.79096	0	0
638	40693	NM_152398_at	40692	8.60335	1.66323	0.193323	3.16724	0	0
639	21928	NM_001002032_at	21927	8.60057	1.67763	0.19506	3.19901	0	0
640	21929	NM_001002033_at	21928	8.60057	1.67763	0.19506	3.19901	0	0
641	33260	NM_016185_at	33259	8.60057	1.67763	0.19506	3.19901	0	0
642	40346	NM_145701_at	40345	8.5926	1.91546	0.22292	3.77235	0	0
643	31302	NM_012322_at	31301	8.58057	1.98707	0.231578	3.96431	0	0
644	29020	NM_005105_at	29019	8.57706	1.81573	0.211696	3.52037	0	0
645	48462	XM_001133936_at	48461	8.57465	1.86883	0.217948	3.65237	0	0
646	23263	NM_001014446_at	23262	8.55517	1.64683	0.192495	3.13145	0	0
647	52108	XM_945908_at	52107	8.54068	1.75073	0.204988	3.36529	0	0
648	42413	NM_178229_at	42412	8.53997	1.83386	0.214738	3.56489	0	0
649	53667	XR_016822_at	53666	8.53907	1.59018	0.186224	3.01087	0	0
650	55407	XR_018709_at	55406	8.53907	1.59018	0.186224	3.01087	0	0
651	29243	NM_005348_at	29242	8.53168	1.65031	0.193433	3.13901	0	0
652	30424	NM_006636_at	30423	8.52746	2.74666	0.322095	6.7116	0	0
653	34264	NM_018154_at	34263	8.52639	2.54124	0.298044	5.82089	0	0
654	37850	NM_032439_at	37849	8.51294	2.40458	0.282462	5.29482	0	0
655	48123	XM_001133051_at	48122	8.50975	1.7081	0.200722	3.26729	0	0
656	48127	XM_001133058_at	48126	8.50975	1.7081	0.200722	3.26729	0	0
657	26230	NM_002106_at	26229	8.49078	2.4136	0.284261	5.32802	0	0
658	44898	NR_002599_at	44897	8.48986	1.83993	0.216721	3.57992	0	0
659	24434	NM_001040409_at	24433	8.48731	2.68289	0.316106	6.4214	0	0
660	48887	XM_290615_at	48886	8.45676	2.15684	0.255044	4.45938	0	0
661	51373	XM_941182_at	51372	8.45676	2.15684	0.255044	4.45938	0	0
662	20967	NM_000194_at	20966	8.44592	2.24811	0.266177	4.75059	0	0
663	32558	NM_015135_at	32557	8.44186	1.7282	0.204717	3.31313	0	0
664	42951	NM_182553_at	42950	8.44029	1.59408	0.188865	3.01902	0	0
665	22901	NM_001010879_at	22900	8.41631	1.8077	0.214786	3.50084	0	0
666	23325	NM_001015885_at	23324	8.41278	1.85845	0.220908	3.62618	0	0
667	32176	NM_014677_at	32175	8.40424	3.06872	0.365139	8.39027	0	0
668	45082	NR_003007_at	45081	8.40348	1.90839	0.227095	3.7539	0	0
669	38410	NM_033280_at	38409	8.40092	3.0189	0.359353	8.10547	0	0
670	27620	NM_003610_at	27619	8.38975	1.84018	0.219337	3.58055	0	0
671	35952	NM_022090_at	35951	8.36241	2.19686	0.262707	4.58482	0	0
672	41874	NM_173632_at	41873	8.36155	1.60471	0.191915	3.04134	0	0
673	39510	NM_138409_at	39509	8.35503	2.29176	0.274297	4.89653	0	0
674	48659	XM_001134430_at	48658	8.34888	1.85444	0.222119	3.61611	0	0
675	22828	NM_001009608_at	22827	8.34062	1.59247	0.19093	3.01566	0	0
676	29975	NM_006157_at	29974	8.30624	3.26326	0.392868	9.60149	0	0
677	31141	NM_012133_at	31140	8.27975	1.93096	0.233215	3.81309	0	0
678	36885	NM_024918_at	36884	8.27868	1.8263	0.220602	3.54625	0	0
679	24301	NM_001039844_at	24300	8.26156	2.2524	0.272636	4.76474	0	0
680	20853	NM_000077_at	20852	8.23683	2.83769	0.344513	7.14875	0	0
681	27146	NM_003081_at	27145	8.23232	2.42418	0.294471	5.36724	0	0
682	34412	NM_018321_at	34411	8.23067	1.59717	0.194051	3.02549	0	0
683	30077	NM_006265_at	30076	8.21804	1.62499	0.197735	3.0844	0	0
684	24554	NM_001042426_at	24553	8.21154	1.84255	0.224385	3.58642	0	0
685	23799	NM_001031701_at	23798	8.20954	1.94165	0.236511	3.84145	0	0
686	36407	NM_024051_at	36406	8.20413	1.81037	0.220666	3.50732	0	0
687	36688	NM_024670_at	36687	8.19883	1.92943	0.23533	3.80904	0	0
688	26828	NM_002750_at	26827	8.18449	1.73506	0.211994	3.32893	0	0
689	39778	NM_139049_at	39777	8.18449	1.73506	0.211994	3.32893	0	0
690	39775	NM_139046_at	39774	8.18081	1.69643	0.207366	3.24097	0	0
691	39776	NM_139047_at	39775	8.18081	1.69643	0.207366	3.24097	0	0
692	44598	NM_207647_at	44597	8.17987	1.68219	0.20565	3.20914	0	0
693	34095	NM_017955_at	34094	8.17766	1.73746	0.212464	3.33448	0	0
694	20844	NM_000068_at	20843	8.17075	2.94033	0.35986	7.67586	0	0
695	36309	NM_023035_at	36308	8.17075	2.94033	0.35986	7.67586	0	0
696	34177	NM_018062_at	34176	8.15926	2.37146	0.290646	5.17463	0	0
697	38110	NM_032842_at	38109	8.14412	1.98436	0.243655	3.95686	0	0
698	27700	NM_003692_at	27699	8.13119	3.15266	0.387724	8.89294	0	0
699	20834	NM_000057_at	20833	8.11115	1.91394	0.235965	3.76838	0	0
700	38874	NM_058216_at	38873	8.09994	1.60754	0.198463	3.04732	0	0
701	31523	NM_013332_at	31522	8.09589	1.80742	0.223251	3.50015	0	0
702	31373	NM_012415_at	31372	8.08497	1.73715	0.214861	3.33375	0	0
703	33269	NM_016200_at	33268	8.08054	1.66714	0.206316	3.17585	0	0
704	32039	NM_014496_at	32038	8.06288	2.38762	0.296125	5.23294	0	0
705	51601	XM_942351_at	51600	8.05455	1.88857	0.234472	3.70267	0	0
706	40169	NM_145060_at	40168	8.04235	1.6682	0.207427	3.17818	0	0
707	33421	NM_016395_at	33420	8.03992	1.71702	0.213562	3.28758	0	0
708	37321	NM_031218_at	37320	8.0387	1.69541	0.210905	3.23868	0	0
709	27234	NM_003179_at	27233	8.03675	1.58543	0.197273	3.00097	0	0
710	25070	NM_001080421_at	25069	8.03529	1.71778	0.213779	3.2893	0	0
711	28905	NM_004984_at	28904	8.03313	1.6457	0.204864	3.12899	0	0
712	24889	NM_001077484_at	24888	8.02521	2.21342	0.275808	4.63773	0	0
713	33090	NM_015975_at	33089	8.02318	1.70859	0.212957	3.26841	0	0
714	45402	XM_001126120_at	45401	8.02318	1.70859	0.212957	3.26841	0	0
715	36207	NM_022774_at	36206	8.01549	1.70669	0.212924	3.2641	0	0
716	35557	NM_021064_at	35556	8.00649	1.76735	0.22074	3.40428	0	0
717	31708	NM_014055_at	31707	8.00291	1.80419	0.225441	3.49232	0	0
718	44128	NM_203292_at	44127	8.00258	1.99658	0.249492	3.99054	0	0
719	35627	NM_021154_at	35626	7.98958	2.07039	0.259136	4.19999	0	0
720	38859	NM_058179_at	38858	7.98958	2.07039	0.259136	4.19999	0	0
721	24976	NM_001079669_at	24975	7.98249	2.06343	0.258494	4.17978	0	0
722	48890	XM_290737_at	48889	7.98153	1.68081	0.210587	3.20608	0	0
723	51260	XM_940636_at	51259	7.98153	1.68081	0.210587	3.20608	0	0
724	44127	NM_203291_at	44126	7.97312	2.0317	0.254819	4.08886	0	0
725	35945	NM_022080_at	35944	7.97257	1.6832	0.211124	3.2114	0	0
726	35041	NM_020200_at	35040	7.97026	2.55167	0.320149	5.86315	0	0
727	38084	NM_032813_at	38083	7.96344	2.05797	0.258427	4.164	0	0
728	32043	NM_014500_at	32042	7.94167	2.39743	0.30188	5.26863	0	0
729	26969	NM_002894_at	26968	7.93376	1.9643	0.247588	3.90225	0	0
730	32205	NM_014711_at	32204	7.92367	2.02699	0.255815	4.07554	0	0
731	32582	NM_015163_at	32581	7.92267	2.23675	0.282323	4.71334	0	0
732	27553	NM_003536_at	27552	7.91481	2.28739	0.289001	4.88171	0	0
733	45623	XM_001126705_at	45622	7.89607	1.82359	0.230949	3.53961	0	0
734	27924	NM_003931_at	27923	7.89598	2.25512	0.285604	4.77375	0	0
735	50720	XM_937931_at	50719	7.89503	1.74149	0.22058	3.3438	0	0
736	36084	NM_022456_at	36083	7.89459	2.28598	0.289563	4.87694	0	0
737	44191	NM_203394_at	44190	7.88657	2.63907	0.334629	6.22932	0	0
738	34595	NM_018649_at	34594	7.88197	2.4763	0.314173	5.56469	0	0
739	42035	NM_174942_at	42034	7.88025	1.98836	0.252322	3.96786	0	0
740	33170	NM_016071_at	33169	7.87607	1.62193	0.205931	3.07787	0	0
741	33390	NM_016351_at	33389	7.85484	2.20024	0.280113	4.59557	0	0
742	48444	XM_001133884_at	48443	7.8375	1.95076	0.248901	3.86579	0	0
743	22701	NM_001008272_at	22700	7.8332	3.34602	0.427159	10.1684	0	0
744	36926	NM_024989_at	36925	7.83067	2.33047	0.297608	5.02969	0	0
745	52986	XR_016069_at	52985	7.8211	2.39896	0.306729	5.27422	0	0
746	38725	NM_052978_at	38724	7.82053	2.11425	0.270347	4.32966	0	0
747	35768	NM_021723_at	35767	7.8192	2.1568	0.275834	4.45924	0	0
748	42112	NM_175624_at	42111	7.80447	2.26102	0.289708	4.7933	0	0
749	38902	NM_078626_at	38901	7.79987	3.0892	0.396057	8.51022	0	0
750	35766	NM_021721_at	35765	7.79847	2.19693	0.281713	4.58504	0	0
751	38870	NM_058195_at	38869	7.79459	2.55482	0.327768	5.87594	0	0
752	23591	NM_001024935_at	23590	7.79168	2.19808	0.282107	4.5887	0	0
753	44934	NR_002746_at	44933	7.78588	2.42652	0.311657	5.37596	0	0
754	42111	NM_175623_at	42110	7.76539	2.20706	0.284217	4.61733	0	0
755	48576	XM_001134277_at	48575	7.76442	2.41059	0.310467	5.31693	0	0
756	28547	NM_004595_at	28546	7.7613	1.84557	0.237791	3.59394	0	0
757	37158	NM_030674_at	37157	7.75764	2.10986	0.271973	4.31651	0	0
758	35767	NM_021722_at	35766	7.74334	2.17134	0.280415	4.50443	0	0
759	33454	NM_016447_at	33453	7.74193	2.12014	0.273851	4.34735	0	0
760	28167	NM_004194_at	28166	7.74026	2.15573	0.278508	4.45594	0	0
761	45066	NR_002984_at	45065	7.72501	1.60498	0.207764	3.04191	0	0
762	24447	NM_001040437_at	24446	7.72007	1.64675	0.213307	3.13127	0	0
763	24448	NM_001040438_at	24447	7.72007	1.64675	0.213307	3.13127	0	0
764	28784	NM_004852_at	28783	7.71896	1.89324	0.245272	3.71469	0	0
765	26841	NM_002763_at	26840	7.71106	2.84246	0.368621	7.17241	0	0
766	38507	NM_033445_at	38506	7.69492	2.61633	0.340007	6.13188	0	0
767	28067	NM_004086_at	28066	7.69133	2.46888	0.320996	5.53615	0	0
768	22702	NM_001008273_at	22701	7.67589	3.15519	0.411052	8.90857	0	0
769	41504	NM_172003_at	41503	7.67117	1.67565	0.218435	3.19463	0	0
770	36316	NM_023070_at	36315	7.67029	1.62683	0.212095	3.08833	0	0
771	44706	NR_000017_at	44705	7.66763	1.66668	0.217365	3.17482	0	0
772	26701	NM_002610_at	26700	7.66196	2.01075	0.262433	4.02992	0	0
773	42113	NM_175625_at	42112	7.64926	2.1724	0.284002	4.50773	0	0
774	45670	XM_001126815_at	45669	7.64533	1.77193	0.231766	3.4151	0	0
775	35863	NM_021952_at	35862	7.63574	2.32922	0.305042	5.02534	0	0.00503007
776	28737	NM_004801_at	28736	7.62207	3.53875	0.464277	11.6217	0	0.0312178
777	31465	NM_013259_at	31464	7.62003	3.08057	0.404273	8.45948	0	0.0351515
778	33738	NM_017516_at	33737	7.61998	2.35111	0.308545	5.10216	0	0.035245
779	32942	NM_015678_at	32941	7.61581	1.93183	0.25366	3.81538	0	0.0432855
780	44777	NR_001566_at	44776	7.59455	1.98988	0.262015	3.97205	0	0.084666
781	35902	NM_021998_at	35901	7.58726	2.86595	0.377732	7.29016	0	0.0989758
782	35029	NM_020188_at	35028	7.57883	1.62295	0.214143	3.08005	0	0.11562
783	52287	XR_015269_at	52286	7.57297	2.38102	0.31441	5.20903	0	0.127234
784	28035	NM_004052_at	28034	7.56234	2.51756	0.332908	5.72614	0	0.148412
785	23590	NM_001024934_at	23589	7.55901	2.13989	0.283091	4.40728	0	0.15508
786	34488	NM_018407_at	34487	7.54295	1.68095	0.222851	3.20639	0	0.187444
787	21204	NM_000439_at	21203	7.53122	3.21101	0.426359	9.25996	0	0.211277
788	33276	NM_016207_at	33275	7.52989	1.94686	0.258551	3.85535	0	0.213995
789	23560	NM_001024647_at	23559	7.5274	2.28596	0.303686	4.8769	0	0.219091
790	30341	NM_006547_at	30340	7.52548	2.04384	0.27159	4.12343	0	0.223016
791	27548	NM_003531_at	27547	7.52268	4.1159	0.547132	17.3384	0	0.228746
792	34653	NM_018719_at	34652	7.51082	2.19639	0.292431	4.58332	0	0.253168
793	42994	NM_182625_at	42993	7.50959	1.78645	0.237889	3.44965	0	0.255707
794	28286	NM_004321_at	28285	7.49974	2.39864	0.31983	5.27307	0	0.276137
795	32444	NM_014985_at	32443	7.49438	1.88531	0.251564	3.69433	0	0.287314
796	45014	NR_002919_at	45013	7.48416	1.80093	0.240632	3.48445	0	0.30871
797	34983	NM_020134_at	34982	7.47958	2.89819	0.38748	7.4549	0	0.318339
798	40964	NM_152737_at	40963	7.45559	2.58527	0.346756	6.00129	0	0.369278
799	21451	NM_000722_at	21450	7.43004	2.75754	0.371134	6.76242	0	0.424337
800	29661	NM_005805_at	29660	7.4234	1.61916	0.218116	3.07197	0	0.438794
801	23592	NM_001024936_at	23591	7.36559	2.0728	0.281416	4.20702	0	0.56714
802	26559	NM_002466_at	26558	7.34987	2.12292	0.288837	4.35574	0	0.602813
803	43259	NM_183404_at	43258	7.33544	2.09741	0.285928	4.27939	0	0.635865
804	37526	NM_031942_at	37525	7.32795	2.27961	0.311084	4.85546	0	0.653118
805	40625	NM_152322_at	40624	7.31685	1.86004	0.254214	3.63018	0	0.678861
806	42315	NM_177937_at	42314	7.29326	2.07952	0.285129	4.22667	0	0.734084
807	40387	NM_145810_at	40386	7.28235	2.25411	0.309531	4.77041	0	0.759902
808	31487	NM_013282_at	31486	7.27622	2.54175	0.349323	5.82296	0	0.774466
809	37337	NM_031271_at	37336	7.26844	1.85952	0.255835	3.62887	0	0.793042
810	32181	NM_014682_at	32180	7.26665	3.63754	0.50058	12.4454	0	0.797339
811	27495	NM_003472_at	27494	7.26043	1.74434	0.240254	3.35042	0	0.81226
812	49960	XM_930470_at	49959	7.25985	1.61693	0.222722	3.06721	0	0.813644
813	51657	XM_942656_at	51656	7.25985	1.61693	0.222722	3.06721	0	0.813644
814	43473	NM_198256_at	43472	7.25427	1.63897	0.225931	3.11442	0	0.827097
815	45126	NR_003095_at	45125	7.25427	1.63897	0.225931	3.11442	0	0.827097
816	6435	4081269_at	6434	7.24922	1.87552	0.25872	3.66933	0	0.839292
817	48217	XM_001133298_at	48216	7.24482	1.90186	0.262513	3.73694	0	0.849958
818	23498	NM_001019_at	23497	7.23834	1.88205	0.260012	3.68599	0	0.865691
819	26970	NM_002895_at	26969	7.23377	2.05377	0.283914	4.15189	0	0.876836

## Sheet: SCLC down
order	Row	Gene ID	Gene Name	Score(d)	Numerator(r)	Denominator(s+s0)	Fold Change	q-value(%)	localfdr(%)
1	27259	NM_003206_at	27258	-33.3544	-3.6529	0.109518	0.0795002	0	0
2	43528	NM_198392_at	43527	-31.1155	-4.10497	0.131927	0.0581142	0	0
3	34894	NM_019601_at	34893	-30.1552	-3.02085	0.100177	0.123207	0	0
4	32111	NM_014601_at	32110	-25.9272	-1.84306	0.0710859	0.27873	0	0.00344532
5	26209	NM_002084_at	26208	-22.405	-3.42154	0.152713	0.0933282	0	0.0438584
6	25353	NM_001136_at	25352	-22.0876	-4.46945	0.202351	0.0451399	0	0.049234
7	41575	NM_172197_at	41574	-21.3847	-4.40098	0.2058	0.047334	0	0.0611814
8	41737	NM_173452_at	41736	-21.3166	-4.00484	0.187874	0.0622909	0	0.0623072
9	30551	NM_006774_at	30550	-20.8908	-3.29477	0.157714	0.1019	0	0.0690219
10	27674	NM_003665_at	27673	-20.7642	-3.86542	0.186158	0.0686108	0	0.0708599
11	43376	NM_198042_at	43375	-20.2426	-1.80175	0.0890076	0.286827	0	0.0772266
12	27130	NM_003062_at	27129	-20.2175	-2.53779	0.125524	0.172207	0	0.0774734
13	35743	NM_021630_at	35742	-19.9664	-1.90313	0.0953171	0.267362	0	0.0795674
14	30402	NM_006612_at	30401	-19.8289	-1.68747	0.0851015	0.310471	0	0.0803921
15	27089	NM_003019_at	27088	-19.6996	-2.93192	0.148831	0.13104	0	0.0809304
16	28605	NM_004657_at	28604	-19.4463	-2.811	0.144552	0.142497	0	0.0812326
17	33652	NM_016929_at	33651	-19.3594	-3.7589	0.194164	0.0738685	0	0.0810797
18	31920	NM_014365_at	31919	-19.3032	-2.76716	0.143352	0.146893	0	0.0809044
19	41779	NM_173505_at	41778	-19.0983	-2.51322	0.131594	0.175164	0	0.0797152
20	31022	NM_007312_at	31021	-19.0683	-1.70735	0.0895385	0.306222	0	0.0794642
21	38333	NM_033159_at	38332	-18.6853	-1.73686	0.0929533	0.300021	0	0.0743222
22	23321	NM_001015880_at	23320	-18.2675	-2.92268	0.159993	0.131882	0	0.0640046
23	28617	NM_004670_at	28616	-18.2675	-2.92268	0.159993	0.131882	0	0.0640046
24	41208	NM_153282_at	41207	-18.2423	-1.86023	0.101974	0.275431	0	0.0632023
25	28783	NM_004851_at	28782	-18.2004	-3.9429	0.216639	0.0650233	0	0.0618196
26	44725	NR_001278_at	44724	-18.097	-4.40967	0.243668	0.0470499	0	0.0581464
27	41207	NM_153281_at	41206	-18.0465	-1.60432	0.0888995	0.32889	0	0.0562057
28	39726	NM_138961_at	39725	-17.8679	-2.55233	0.142844	0.17048	0	0.048561
29	21127	NM_000361_at	21126	-17.8563	-2.65737	0.14882	0.158508	0	0.0480231
30	35313	NM_020717_at	35312	-17.7133	-2.23194	0.126003	0.212873	0	0.0408971
31	20892	NM_000118_at	20891	-17.6853	-2.39103	0.135199	0.190647	0	0.0393949
32	20999	NM_000228_at	20998	-17.5999	-1.68092	0.0955076	0.311883	0	0.0346132
33	41211	NM_153285_at	41210	-17.5328	-1.64391	0.0937621	0.319988	0	0.0306227
34	9619	4093609_at	9618	-17.5305	-1.98485	0.113223	0.252639	0	0.0304841
35	20797	NM_000020_at	20796	-17.4688	-2.46265	0.140974	0.181413	0	0.026626
36	40810	NM_152536_at	40809	-17.2332	-1.96471	0.114007	0.25619	0	0.0101848
37	25934	NM_001795_at	25933	-17.1791	-2.84918	0.165852	0.138775	0	0.00601061
38	29529	NM_005656_at	29528	-17.1003	-3.23064	0.188923	0.106532	0	0
39	41212	NM_153286_at	41211	-17.093	-1.71636	0.100413	0.304316	0	0
40	23350	NM_001017402_at	23349	-17.091	-1.6167	0.0945939	0.32608	0	0
41	41210	NM_153284_at	41209	-16.9289	-2.03488	0.120202	0.244028	0	0
42	24861	NM_001077401_at	24860	-16.8639	-2.44529	0.145001	0.183609	0	0
43	39841	NM_139211_at	39840	-16.8555	-2.05285	0.121791	0.241008	0	0
44	40084	NM_144962_at	40083	-16.805	-3.34963	0.199323	0.0980984	0	0
45	27738	NM_003734_at	27737	-16.7411	-3.66913	0.21917	0.0786106	0	0
46	36415	NM_024060_at	36414	-16.6603	-1.78657	0.107235	0.28986	0	0
47	39865	NM_139278_at	39864	-16.4861	-1.91698	0.116278	0.264808	0	0
48	28425	NM_004469_at	28424	-16.4849	-4.21777	0.255857	0.0537434	0	0
49	21401	NM_000667_at	21400	-16.439	-1.71847	0.104536	0.303871	0	0
50	43007	NM_182643_at	43006	-16.3626	-2.8363	0.173341	0.140019	0	0
51	43710	NM_198827_at	43709	-16.2585	-2.38179	0.146495	0.191871	0	0
52	30137	NM_006329_at	30136	-16.1753	-3.29415	0.203654	0.101944	0	0
53	36286	NM_022963_at	36285	-16.0818	-1.99728	0.124195	0.250472	0	0
54	26914	NM_002837_at	26913	-16.0547	-3.28808	0.204806	0.102374	0	0
55	48765	XM_067585_at	48764	-16.027	-2.14536	0.133859	0.226038	0	0
56	29050	NM_005139_at	29049	-16.0154	-3.43294	0.214353	0.0925937	0	0
57	35339	NM_020754_at	35338	-16.0143	-2.69814	0.168483	0.154092	0	0
58	26139	NM_002011_at	26138	-15.9937	-2.02186	0.126416	0.24624	0	0
59	42240	NM_176871_at	42239	-15.9611	-1.80464	0.113064	0.286253	0	0
60	51143	XM_940071_at	51142	-15.9145	-2.14657	0.134881	0.22585	0	0
61	44670	NM_213647_at	44669	-15.7961	-1.93412	0.122443	0.261681	0	0
62	29840	NM_006005_at	29839	-15.7002	-1.62776	0.103677	0.323591	0	0
63	31221	NM_012232_at	31220	-15.649	-2.54232	0.162458	0.171667	0	0
64	36978	NM_025107_at	36977	-15.5961	-1.99158	0.127697	0.251464	0	0
65	21402	NM_000668_at	21401	-15.5308	-4.13216	0.266062	0.0570289	0	0
66	26720	NM_002630_at	26719	-15.5145	-3.92654	0.253089	0.0657646	0	0
67	27970	NM_003979_at	27969	-15.4951	-4.05344	0.261595	0.0602271	0	0
68	31090	NM_012072_at	31089	-15.4906	-2.63278	0.16996	0.161233	0	0
69	21235	NM_000478_at	21234	-15.4205	-2.74422	0.177959	0.149248	0	0
70	30547	NM_006770_at	30546	-15.416	-2.54531	0.165108	0.171312	0	0
71	33105	NM_015993_at	33104	-15.415	-2.18071	0.141467	0.220568	0	0
72	26409	NM_002292_at	26408	-15.1706	-1.8871	0.124392	0.270351	0	0
73	21617	NM_000901_at	21616	-15.1285	-1.70071	0.112417	0.307635	0	0
74	34822	NM_019055_at	34821	-15.1077	-1.93645	0.128176	0.261259	0	0
75	44731	NR_001284_at	44730	-15.0138	-2.1449	0.142862	0.22611	0	0
76	31711	NM_014059_at	31710	-14.961	-2.85133	0.190585	0.138569	0	0
77	27032	NM_002961_at	27031	-14.9566	-3.11818	0.208482	0.115168	0	0
78	34863	NM_019105_at	34862	-14.9435	-2.20633	0.147645	0.216685	0	0
79	31613	NM_013443_at	31612	-14.936	-1.63215	0.109276	0.322608	0	0
80	29922	NM_006094_at	29921	-14.92	-3.28545	0.220204	0.102561	0	0
81	42385	NM_178140_at	42384	-14.9022	-1.90388	0.127759	0.267223	0	0
82	22513	NM_001005914_at	22512	-14.8265	-1.62045	0.109295	0.325233	0	0
83	28586	NM_004636_at	28585	-14.8265	-1.62045	0.109295	0.325233	0	0
84	22769	NM_001008711_at	22768	-14.7383	-2.40274	0.163027	0.189105	0	0
85	24733	NM_001045_at	24732	-14.708	-4.09199	0.278215	0.0586393	0	0
86	36644	NM_024621_at	36643	-14.6952	-2.57773	0.175413	0.167504	0	0
87	43403	NM_198098_at	43402	-14.6368	-3.21169	0.219426	0.107941	0	0
88	35663	NM_021197_at	35662	-14.6365	-1.60175	0.109436	0.329476	0	0
89	28749	NM_004816_at	28748	-14.6248	-2.71923	0.185933	0.151855	0	0
90	34878	NM_019554_at	34877	-14.6157	-2.75877	0.188753	0.14775	0	0
91	35533	NM_021021_at	35532	-14.5833	-1.97057	0.135125	0.255153	0	0
92	37872	NM_032470_at	37871	-14.4894	-2.01644	0.139167	0.247167	0	0
93	29317	NM_005434_at	29316	-14.4603	-2.61436	0.180796	0.163305	0	0
94	30640	NM_006867_at	30639	-14.3913	-2.45221	0.170395	0.182731	0	0
95	41611	NM_172313_at	41610	-14.3705	-2.30855	0.160645	0.201863	0	0
96	39842	NM_139212_at	39841	-14.3059	-2.4463	0.171	0.183481	0	0
97	29652	NM_005795_at	29651	-14.2927	-3.30011	0.230895	0.101524	0	0
98	21484	NM_000760_at	21483	-14.2347	-2.20746	0.155075	0.216515	0	0
99	22768	NM_001008710_at	22767	-14.2206	-2.47758	0.174225	0.179545	0	0
100	41409	NM_156038_at	41408	-14.2103	-2.24501	0.157984	0.210953	0	0
101	40075	NM_144777_at	40074	-14.1863	-2.7104	0.191057	0.152787	0	0
102	27316	NM_003278_at	27315	-14.1798	-1.95748	0.138048	0.257477	0	0
103	44281	NM_205854_at	44280	-14.1665	-2.51279	0.177376	0.175217	0	0
104	27843	NM_003843_at	27842	-14.156	-2.67591	0.18903	0.156484	0	0
105	37891	NM_032495_at	37890	-14.1503	-2.23677	0.158072	0.212161	0	0
106	33450	NM_016441_at	33449	-14.14	-2.27895	0.16117	0.206047	0	0
107	25618	NM_001430_at	25617	-14.1103	-3.55991	0.252292	0.0847929	0	0
108	28405	NM_004449_at	28404	-14.0901	-2.00161	0.142058	0.24972	0	0
109	43140	NM_182918_at	43139	-14.078	-2.12641	0.151044	0.229027	0	0
110	33626	NM_016730_at	33625	-14.0491	-2.93326	0.208787	0.130918	0	0
111	21622	NM_000906_at	21621	-14.0391	-2.04377	0.145577	0.242529	0	0
112	44581	NM_207517_at	44580	-14.0326	-1.92179	0.136952	0.263927	0	0
113	26060	NM_001928_at	26059	-14.0055	-2.32937	0.166318	0.198972	0	0
114	25309	NM_001089_at	25308	-14.0027	-2.44746	0.174785	0.183333	0	0
115	43163	NM_182966_at	43162	-13.9946	-2.70105	0.193006	0.153781	0	0
116	27017	NM_002944_at	27016	-13.9771	-3.51128	0.251216	0.0877001	0	0
117	28849	NM_004925_at	28848	-13.9519	-2.70247	0.193699	0.15363	0	0
118	44972	NR_002798_at	44971	-13.8677	-1.73842	0.125357	0.299698	0	0
119	41410	NM_156039_at	41409	-13.8559	-2.13905	0.154378	0.22703	0	0
120	32826	NM_015493_at	32825	-13.8463	-1.61831	0.116877	0.325716	0	0
121	36360	NM_023938_at	36359	-13.8371	-2.42834	0.175495	0.185778	0	0
122	34589	NM_018643_at	34588	-13.735	-3.23816	0.23576	0.105978	0	0
123	23502	NM_001020820_at	23501	-13.7245	-2.57191	0.187395	0.168182	0	0
124	23501	NM_001020819_at	23500	-13.7162	-2.53441	0.184775	0.17261	0	0
125	29829	NM_005994_at	29828	-13.7127	-1.64724	0.120125	0.31925	0	0
126	38748	NM_053027_at	38747	-13.705	-1.97618	0.144194	0.254162	0	0
127	42693	NM_181526_at	42692	-13.6931	-1.99948	0.146022	0.250089	0	0
128	29872	NM_006039_at	29871	-13.6563	-1.7078	0.125056	0.306127	0	0
129	32030	NM_014483_at	32029	-13.6415	-2.27833	0.167015	0.206136	0	0
130	38749	NM_053028_at	38748	-13.6393	-1.9865	0.145645	0.25235	0	0
131	33624	NM_016725_at	33623	-13.6122	-3.12384	0.229489	0.114718	0	0
132	33623	NM_016724_at	33622	-13.5934	-3.12221	0.229687	0.114847	0	0
133	42014	NM_174918_at	42013	-13.581	-3.42118	0.251909	0.0933519	0	0
134	38746	NM_053025_at	38745	-13.5764	-2.0002	0.14733	0.249965	0	0
135	22065	NM_001003793_at	22064	-13.5728	-2.1817	0.16074	0.220416	0	0
136	29131	NM_005228_at	29130	-13.5691	-1.93021	0.14225	0.262391	0	0
137	38747	NM_053026_at	38746	-13.5469	-2.00652	0.148117	0.248872	0	0
138	22064	NM_001003792_at	22063	-13.5142	-2.14263	0.158547	0.226467	0	0
139	32950	NM_015687_at	32949	-13.4936	-2.1073	0.156171	0.232081	0	0
140	26132	NM_002003_at	26131	-13.4699	-1.59832	0.118659	0.330261	0	0
141	39487	NM_138373_at	39486	-13.4572	-2.55085	0.189552	0.170654	0	0
142	21424	NM_000690_at	21423	-13.4331	-2.31749	0.172521	0.200616	0	0
143	29925	NM_006097_at	29924	-13.4243	-2.09582	0.156121	0.233935	0	0
144	42097	NM_175571_at	42096	-13.3777	-1.87908	0.140464	0.271856	0	0
145	23503	NM_001020821_at	23502	-13.3321	-2.52941	0.189723	0.173209	0	0
146	22770	NM_001008712_at	22769	-13.3224	-2.51698	0.188927	0.174709	0	0
147	33625	NM_016729_at	33624	-13.3162	-3.17317	0.238293	0.110862	0	0
148	32633	NM_015234_at	32632	-13.2702	-3.22114	0.242735	0.107236	0	0
149	29461	NM_005585_at	29460	-13.2637	-2.15815	0.162711	0.224043	0	0
150	23500	NM_001020818_at	23499	-13.2566	-2.47867	0.186977	0.179409	0	0
151	34500	NM_018421_at	34499	-13.222	-1.65996	0.125545	0.316448	0	0
152	29307	NM_005424_at	29306	-13.1231	-2.01614	0.153633	0.247219	0	0
153	16394	4119310_at	16393	-13.1203	-2.17703	0.165929	0.22113	0	0
154	41466	NM_170737_at	41465	-13.1117	-3.20061	0.244103	0.108773	0	0
155	42076	NM_175060_at	42075	-13.0529	-2.0205	0.154793	0.246473	0	0
156	36759	NM_024756_at	36758	-13.0526	-1.65229	0.126587	0.318135	0	0
157	32237	NM_014745_at	32236	-13.0424	-1.61275	0.123654	0.326974	0	0
158	21523	NM_000802_at	21522	-13.042	-3.32018	0.254576	0.100122	0	0
159	33627	NM_016731_at	33626	-13.042	-3.32018	0.254576	0.100122	0	0
160	31890	NM_014330_at	31889	-12.9762	-2.20098	0.169617	0.217489	0	0
161	26973	NM_002898_at	26972	-12.9615	-1.7238	0.132993	0.302751	0	0
162	23474	NM_001018090_at	23473	-12.9524	-2.62867	0.202949	0.161693	0	0
163	23475	NM_001018091_at	23474	-12.9524	-2.62867	0.202949	0.161693	0	0
164	43656	NM_198578_at	43655	-12.9199	-4.14396	0.320743	0.0565645	0	0
165	29707	NM_005856_at	29706	-12.9141	-1.98964	0.154067	0.251802	0	0
166	28616	NM_004669_at	28615	-12.9086	-1.65382	0.128118	0.317798	0	0
167	30208	NM_006403_at	30207	-12.9034	-2.8729	0.222647	0.136512	0	0
168	30098	NM_006287_at	30097	-12.8866	-2.64634	0.205356	0.159725	0	0
169	23859	NM_001032281_at	23858	-12.8728	-2.51589	0.195442	0.174841	0	0
170	28721	NM_004785_at	28720	-12.8307	-2.13684	0.166541	0.227377	0	0
171	28574	NM_004624_at	28573	-12.8245	-2.80063	0.218381	0.143524	0	0
172	40742	NM_152451_at	40741	-12.7601	-2.69353	0.211091	0.154584	0	0
173	24718	NM_001044392_at	24717	-12.7314	-2.47255	0.194209	0.180173	0	0
174	21307	NM_000552_at	21306	-12.7261	-2.77959	0.218417	0.145633	0	0
175	25924	NM_001784_at	25923	-12.6045	-2.68744	0.213214	0.155238	0	0
176	41413	NM_170600_at	41412	-12.6003	-1.74731	0.138672	0.297857	0	0
177	23635	NM_001025160_at	23634	-12.5959	-2.68336	0.213035	0.155678	0	0
178	38896	NM_078481_at	38895	-12.5959	-2.68336	0.213035	0.155678	0	0
179	41465	NM_170736_at	41464	-12.5827	-3.15323	0.2506	0.112404	0	0
180	36470	NM_024164_at	36469	-12.556	-3.2977	0.26264	0.101694	0	0
181	28107	NM_004126_at	28106	-12.5413	-2.46511	0.19656	0.181104	0	0
182	45459	XM_001126256_at	45458	-12.5362	-1.94284	0.154978	0.260105	0	0
183	23476	NM_001018100_at	23475	-12.5154	-2.62478	0.209724	0.16213	0	0
184	28509	NM_004557_at	28508	-12.5063	-1.62993	0.130329	0.323104	0	0
185	20801	NM_000024_at	20800	-12.4927	-2.27964	0.182477	0.20595	0	0
186	32093	NM_014583_at	32092	-12.4541	-1.98595	0.159461	0.252447	0	0
187	36010	NM_022154_at	36009	-12.4371	-3.17542	0.255319	0.110688	0	0
188	24717	NM_001044391_at	24716	-12.4345	-2.51068	0.201912	0.175473	0	0
189	38699	NM_052946_at	38698	-12.3982	-1.94582	0.156944	0.259566	0	0
190	44647	NM_213600_at	44646	-12.3625	-2.12254	0.171692	0.229642	0	0
191	43498	NM_198316_at	43497	-12.3454	-2.05598	0.166538	0.240485	0	0
192	30811	NM_007061_at	30810	-12.3382	-1.72785	0.140041	0.301902	0	0
193	40564	NM_152243_at	40563	-12.3382	-1.72785	0.140041	0.301902	0	0
194	36018	NM_022164_at	36017	-12.32	-1.72539	0.140048	0.302416	0	0
195	29101	NM_005195_at	29100	-12.316	-1.97406	0.160284	0.254536	0	0
196	26323	NM_002204_at	26322	-12.3118	-2.18908	0.177804	0.219291	0	0
197	24276	NM_001039724_at	24275	-12.2577	-1.97308	0.160967	0.254708	0	0
198	29380	NM_005501_at	29379	-12.2474	-2.19962	0.179598	0.217696	0	0
199	32691	NM_015319_at	32690	-12.2136	-2.0001	0.16376	0.249982	0	0
200	26361	NM_002243_at	26360	-12.211	-3.05169	0.249912	0.120601	0	0
201	36153	NM_022648_at	36152	-12.2104	-2.41626	0.197886	0.187342	0	0
202	24791	NM_001065_at	24790	-12.1803	-1.71383	0.140706	0.304849	0	0
203	27982	NM_003991_at	27981	-12.1787	-3.35328	0.275339	0.0978505	0	0
204	34297	NM_018192_at	34296	-12.1749	-2.16736	0.178019	0.222617	0	0
205	39197	NM_130783_at	39196	-12.139	-1.95815	0.161311	0.257358	0	0
206	43394	NM_198080_at	43393	-12.1326	-1.64011	0.135182	0.320832	0	0
207	41480	NM_170754_at	41479	-12.1236	-1.95119	0.160942	0.258603	0	0
208	32593	NM_015178_at	32592	-12.1126	-1.59775	0.131908	0.330392	0	0
209	21924	NM_001002026_at	21923	-12.1107	-3.49779	0.288817	0.088524	0	0
210	25226	NM_001080950_at	25225	-12.094	-1.82339	0.150768	0.282557	0	0
211	38466	NM_033375_at	38465	-12.0903	-1.80949	0.149664	0.285291	0	0
212	25201	NM_001080779_at	25200	-12.0821	-1.72984	0.143173	0.301486	0	0
213	29368	NM_005489_at	29367	-12.0366	-1.88853	0.156899	0.270082	0	0
214	41195	NM_153267_at	41194	-12.0206	-3.31421	0.275711	0.100537	0	0
215	43988	NM_201277_at	43987	-12.005	-2.05805	0.171432	0.24014	0	0
216	21444	NM_000715_at	21443	-11.9631	-4.3085	0.36015	0.0504675	0	0
217	39855	NM_139247_at	39854	-11.9194	-1.65675	0.138995	0.317154	0	0
218	25357	NM_001141_at	25356	-11.9156	-1.74986	0.146855	0.29733	0	0
219	23632	NM_001025109_at	23631	-11.9011	-2.18096	0.183257	0.220529	0	0
220	20889	NM_000115_at	20888	-11.8918	-3.28424	0.276177	0.102647	0	0
221	34556	NM_018488_at	34555	-11.8915	-2.10612	0.177111	0.232272	0	0
222	41252	NM_153366_at	41251	-11.8672	-2.96723	0.250036	0.127872	0	0
223	36602	NM_024574_at	36601	-11.8505	-3.46115	0.292068	0.0908012	0	0
224	23784	NM_001031679_at	23783	-11.8032	-1.66573	0.141125	0.315185	0	0
225	21325	NM_000578_at	21324	-11.7825	-2.36059	0.200348	0.194711	0	0
226	24165	NM_001039131_at	24164	-11.7798	-1.70248	0.144526	0.307257	0	0
227	37718	NM_032279_at	37717	-11.7111	-2.8737	0.245383	0.136436	0	0
228	29505	NM_005630_at	29504	-11.71	-3.00498	0.256616	0.12457	0	0
229	33406	NM_016369_at	33405	-11.695	-4.1953	0.358727	0.0545869	0	0
230	48785	XM_087386_at	48784	-11.6709	-2.81925	0.241561	0.141684	0	0
231	23430	NM_001018016_at	23429	-11.6674	-2.77492	0.237834	0.146106	0	0
232	24164	NM_001039130_at	24163	-11.6502	-1.78033	0.152815	0.291117	0	0
233	30894	NM_007168_at	30893	-11.6137	-2.33752	0.201272	0.19785	0	0
234	27318	NM_003280_at	27317	-11.6049	-1.82708	0.15744	0.281834	0	0
235	27047	NM_002976_at	27046	-11.5931	-3.33182	0.287398	0.0993165	0	0
236	25913	NM_001773_at	25912	-11.5687	-2.0905	0.180703	0.2348	0	0
237	41531	NM_172089_at	41530	-11.568	-2.01389	0.174091	0.247605	0	0
238	23891	NM_001032394_at	23890	-11.5667	-2.32741	0.201215	0.199242	0	0
239	23892	NM_001032395_at	23891	-11.558	-2.32293	0.20098	0.199861	0	0
240	46603	XM_001129251_at	46602	-11.4945	-2.79106	0.242817	0.14448	0	0
241	21081	NM_000313_at	21080	-11.4934	-2.087	0.181584	0.235369	0	0
242	43650	NM_198569_at	43649	-11.4926	-2.28448	0.198778	0.20526	0	0
243	21481	NM_000757_at	21480	-11.4862	-1.76936	0.154042	0.293339	0	0
244	27066	NM_002996_at	27065	-11.4645	-2.19352	0.191331	0.218618	0	0
245	24579	NM_001042467_at	24578	-11.4463	-2.01737	0.176246	0.247009	0	0
246	41529	NM_172087_at	41528	-11.4444	-2.09639	0.183181	0.233843	0	0
247	23431	NM_001018017_at	23430	-11.441	-2.81304	0.245873	0.142295	0	0
248	35204	NM_020455_at	35203	-11.4341	-2.28781	0.200087	0.204786	0	0
249	49813	XM_929312_at	49812	-11.433	-2.22632	0.194727	0.213704	0	0
250	51296	XM_940811_at	51295	-11.433	-2.22632	0.194727	0.213704	0	0
251	39145	NM_130386_at	39144	-11.4218	-2.38089	0.20845	0.191991	0	0
252	26455	NM_002353_at	26454	-11.4059	-2.3833	0.208953	0.191671	0	0
253	24716	NM_001044390_at	24715	-11.4043	-2.70881	0.237525	0.152956	0	0
254	26085	NM_001955_at	26084	-11.403	-3.23526	0.28372	0.106191	0	0
255	27809	NM_003808_at	27808	-11.3782	-2.14156	0.188216	0.226635	0	0
256	26552	NM_002456_at	26551	-11.3782	-2.86957	0.2522	0.136827	0	0
257	25753	NM_001608_at	25752	-11.3701	-2.41914	0.212762	0.186968	0	0
258	21605	NM_000888_at	21604	-11.3682	-2.90338	0.255395	0.133658	0	0
259	33902	NM_017734_at	33901	-11.3672	-1.99869	0.17583	0.250227	0	0
260	33275	NM_016206_at	33274	-11.3645	-1.72869	0.152113	0.301725	0	0
261	36451	NM_024101_at	36450	-11.3579	-1.98621	0.174874	0.252401	0	0
262	41584	NM_172211_at	41583	-11.3389	-1.81943	0.160459	0.283333	0	0
263	41585	NM_172212_at	41584	-11.3343	-1.74894	0.154306	0.29752	0	0
264	31751	NM_014164_at	31750	-11.2574	-1.65701	0.147193	0.317096	0	0
265	26435	NM_002332_at	26434	-11.2497	-1.99508	0.177345	0.250855	0	0
266	30917	NM_007191_at	30916	-11.2482	-3.72426	0.331098	0.0756634	0	0
267	20843	NM_000067_at	20842	-11.2367	-1.98486	0.17664	0.252637	0	0
268	24719	NM_001044393_at	24718	-11.2121	-2.68537	0.239507	0.155461	0	0
269	22028	NM_001003679_at	22027	-11.1958	-2.33492	0.208554	0.198207	0	0
270	28048	NM_004065_at	28047	-11.1947	-2.70127	0.241298	0.153758	0	0
271	22029	NM_001003680_at	22028	-11.1939	-2.34849	0.209801	0.196352	0	0
272	48815	XM_166132_at	48814	-11.1937	-2.09094	0.186796	0.234728	0	0
273	51984	XM_944819_at	51983	-11.1937	-2.09094	0.186796	0.234728	0	0
274	30082	NM_006270_at	30081	-11.1877	-2.02651	0.181138	0.245448	0	0
275	41583	NM_172210_at	41582	-11.1687	-1.81148	0.162192	0.284898	0	0
276	42770	NM_181703_at	42769	-11.1682	-2.34031	0.209551	0.197468	0	0
277	21224	NM_000459_at	21223	-11.1398	-2.96015	0.265726	0.128501	0	0
278	27284	NM_003243_at	27283	-11.1341	-2.53882	0.228022	0.172083	0	0
279	41530	NM_172088_at	41529	-11.1234	-2.10264	0.189028	0.232832	0	0
280	25628	NM_001442_at	25627	-11.1112	-3.41146	0.30703	0.0939827	0	0
281	44075	NM_201591_at	44074	-11.0808	-2.76814	0.249814	0.146794	0	0
282	21855	NM_001001851_at	21854	-11.0697	-1.7339	0.156634	0.300638	0	0
283	29694	NM_005842_at	29693	-11.0297	-1.77701	0.161111	0.291788	0	0
284	43072	NM_182757_at	43071	-10.9989	-2.23666	0.203354	0.212177	0	0
285	37047	NM_025214_at	37046	-10.9941	-1.75919	0.160012	0.295415	0	0
286	44320	NM_206854_at	44319	-10.9758	-1.8144	0.165309	0.284323	0	0
287	23822	NM_001031730_at	23821	-10.9736	-1.98778	0.181143	0.252126	0	0
288	22943	NM_001010972_at	22942	-10.9718	-1.94071	0.176882	0.260487	0	0
289	27485	NM_003461_at	27484	-10.9718	-1.94071	0.176882	0.260487	0	0
290	33013	NM_015881_at	33012	-10.9657	-1.95722	0.178485	0.257524	0	0
291	44321	NM_206855_at	44320	-10.9595	-1.73574	0.158377	0.300255	0	0
292	35821	NM_021902_at	35820	-10.9391	-2.06146	0.188449	0.239573	0	0
293	51286	XM_940755_at	51285	-10.9306	-3.37343	0.308624	0.096493	0	0
294	28205	NM_004235_at	28204	-10.9123	-2.7238	0.249607	0.151375	0	0
295	30659	NM_006887_at	30658	-10.9122	-1.64922	0.151137	0.318811	0	0
296	43441	NM_198194_at	43440	-10.8901	-1.75096	0.160784	0.297104	0	0
297	40819	NM_152547_at	40818	-10.8761	-1.81492	0.166873	0.284219	0	0
298	28329	NM_004368_at	28328	-10.8732	-2.08938	0.192158	0.234982	0	0
299	28024	NM_004041_at	28023	-10.8549	-2.21043	0.203634	0.216069	0	0
300	35080	NM_020251_at	35079	-10.8549	-2.21043	0.203634	0.216069	0	0
301	6398	4081138_at	6397	-10.853	-2.78962	0.257036	0.144625	0	0
302	21321	NM_000574_at	21320	-10.8525	-2.22533	0.205052	0.21385	0	0
303	25591	NM_001400_at	25590	-10.8334	-1.75602	0.162093	0.296064	0	0
304	36909	NM_024949_at	36908	-10.8198	-2.28024	0.210747	0.205864	0	0
305	21282	NM_000527_at	21281	-10.8175	-2.33996	0.216313	0.197516	0	0
306	25362	NM_001146_at	25361	-10.815	-2.0954	0.193748	0.234004	0	0
307	22197	NM_001004470_at	22196	-10.7739	-2.07457	0.192554	0.237407	0	0
308	21761	NM_001001548_at	21760	-10.7738	-2.81966	0.261714	0.141644	0	0
309	29268	NM_005380_at	29267	-10.7729	-1.71818	0.15949	0.303932	0	0
310	21183	NM_000418_at	21182	-10.7716	-2.20429	0.20464	0.216991	0	0
311	32078	NM_014568_at	32077	-10.7288	-2.47132	0.230345	0.180326	0	0
312	43028	NM_182684_at	43027	-10.7187	-1.63043	0.152111	0.322992	0	0
313	22612	NM_001007224_at	22611	-10.7167	-1.85349	0.172953	0.276723	0	0
314	36723	NM_024711_at	36722	-10.7005	-1.83632	0.171611	0.280036	0	0
315	36831	NM_024843_at	36830	-10.6987	-2.46489	0.230392	0.181131	0	0
316	26803	NM_002725_at	26802	-10.694	-2.43302	0.227513	0.185177	0	0
317	43997	NM_201348_at	43996	-10.694	-2.43302	0.227513	0.185177	0	0
318	26370	NM_002253_at	26369	-10.6858	-2.2016	0.20603	0.217396	0	0
319	26420	NM_002303_at	26419	-10.6765	-2.22584	0.20848	0.213774	0	0
320	39542	NM_138445_at	39541	-10.6703	-1.9789	0.185459	0.253684	0	0
321	21490	NM_000767_at	21489	-10.6651	-2.04004	0.191282	0.243156	0	0
322	26324	NM_002205_at	26323	-10.6593	-1.96911	0.184731	0.255411	0	0
323	22761	NM_001008699_at	22760	-10.6545	-2.17601	0.204234	0.221287	0	0
324	37036	NM_025201_at	37035	-10.6445	-1.6816	0.157978	0.311736	0	0
325	35690	NM_021229_at	35689	-10.627	-1.96261	0.184682	0.256564	0	0
326	29179	NM_005277_at	29178	-10.6226	-2.45264	0.230888	0.182676	0	0
327	43065	NM_182744_at	43064	-10.6218	-1.70006	0.160054	0.307773	0	0
328	25877	NM_001736_at	25876	-10.6185	-2.30368	0.216949	0.202546	0	0
329	27434	NM_003407_at	27433	-10.6032	-2.86494	0.270197	0.137267	0	0
330	29168	NM_005266_at	29167	-10.5959	-2.17985	0.205726	0.220698	0	0
331	39134	NM_080920_at	39133	-10.5874	-1.64731	0.155591	0.319235	0	0
332	42427	NM_178312_at	42426	-10.5874	-1.64731	0.155591	0.319235	0	0
333	36101	NM_022475_at	36100	-10.5766	-2.74969	0.259978	0.148683	0	0
334	31459	NM_013253_at	31458	-10.5766	-1.95659	0.184992	0.257637	0	0
335	38191	NM_032963_at	38190	-10.5165	-2.57225	0.244592	0.168142	0	0
336	40748	NM_152459_at	40747	-10.5115	-2.20905	0.210155	0.216276	0	0
337	23448	NM_001018057_at	23447	-10.5081	-2.02966	0.193152	0.244913	0	0
338	32776	NM_015429_at	32775	-10.5042	-2.84204	0.270563	0.139464	0	0
339	37019	NM_025170_at	37018	-10.4919	-2.11955	0.202018	0.230119	0	0
340	31036	NM_007329_at	31035	-10.4798	-3.90124	0.372263	0.0669283	0	0
341	36850	NM_024870_at	36849	-10.4763	-2.0112	0.191976	0.248067	0	0
342	44319	NM_206853_at	44318	-10.4755	-1.76789	0.168764	0.293638	0	0
343	30094	NM_006283_at	30093	-10.4697	-1.90674	0.18212	0.266695	0	0
344	27283	NM_003242_at	27282	-10.432	-2.77988	0.266476	0.145604	0	0
345	36657	NM_024636_at	36656	-10.4294	-3.70355	0.355105	0.0767575	0	0
346	23584	NM_001024847_at	23583	-10.4264	-2.74588	0.26336	0.149076	0	0
347	29705	NM_005854_at	29704	-10.419	-1.81491	0.174193	0.284223	0	0
348	28951	NM_005031_at	28950	-10.4166	-1.85241	0.177832	0.27693	0	0
349	26707	NM_002616_at	26706	-10.4165	-1.86928	0.179454	0.273709	0	0
350	33783	NM_017579_at	33782	-10.4139	-3.91559	0.375997	0.066266	0	0
351	30743	NM_006988_at	30742	-10.4095	-2.87345	0.276042	0.13646	0	0
352	28364	NM_004406_at	28363	-10.3979	-3.9426	0.379173	0.0650366	0	0
353	32350	NM_014880_at	32349	-10.3583	-2.06719	0.199568	0.238624	0	0
354	48239	XM_001133349_at	48238	-10.3396	-1.76344	0.170551	0.294546	0	0
355	36520	NM_024408_at	36519	-10.3051	-1.7593	0.170721	0.295392	0	0
356	28013	NM_004028_at	28012	-10.3015	-4.37346	0.424546	0.0482456	0	0
357	25192	NM_001080547_at	25191	-10.2862	-1.70739	0.165988	0.306213	0	0
358	27182	NM_003120_at	27181	-10.2862	-1.70739	0.165988	0.306213	0	0
359	35925	NM_022059_at	35924	-10.2618	-2.73051	0.266084	0.150672	0	0
360	32445	NM_014988_at	32444	-10.2605	-2.4255	0.236393	0.186145	0	0
361	25795	NM_001650_at	25794	-10.2584	-4.23702	0.41303	0.053031	0	0
362	21500	NM_000779_at	21499	-10.2528	-3.84516	0.375033	0.0695812	0	0
363	31534	NM_013343_at	31533	-10.2418	-2.07977	0.203067	0.236552	0	0
364	47658	XM_001131899_at	47657	-10.2395	-1.96405	0.191812	0.256308	0	0
365	40441	NM_147150_at	40440	-10.2374	-1.6795	0.164054	0.312192	0	0
366	29391	NM_005512_at	29390	-10.2327	-2.49621	0.243946	0.177242	0	0
367	27965	NM_003974_at	27964	-10.2082	-1.70292	0.166819	0.307163	0	0
368	32258	NM_014767_at	32257	-10.2016	-2.33263	0.228653	0.198522	0	0
369	35680	NM_021219_at	35679	-10.1975	-2.18448	0.214218	0.219992	0	0
370	25774	NM_001629_at	25773	-10.1934	-3.10736	0.30484	0.116036	0	0
371	24689	NM_001042729_at	24688	-10.1822	-2.0545	0.201773	0.240732	0	0
372	27767	NM_003764_at	27766	-10.178	-2.67169	0.262497	0.156943	0	0
373	28080	NM_004099_at	28079	-10.1759	-1.82827	0.179667	0.281601	0	0
374	27305	NM_003265_at	27304	-10.0612	-1.78243	0.177159	0.290693	0	0
375	20974	NM_000201_at	20973	-10.057	-3.26995	0.325141	0.103668	0	0
376	22817	NM_001009555_at	22816	-10.0469	-2.22617	0.221577	0.213725	0	0
377	25418	NM_001206_at	25417	-10.0387	-1.69409	0.168755	0.309051	0	0
378	21579	NM_000860_at	21578	-10.0249	-3.51476	0.350602	0.0874886	0	0
379	36627	NM_024600_at	36626	-10.0195	-2.02447	0.202053	0.245796	0	0
380	24691	NM_001042747_at	24690	-10.0167	-1.89952	0.189634	0.268033	0	0
381	21934	NM_001002233_at	21933	-9.9933	-2.06654	0.206793	0.238731	0	0
382	21596	NM_000877_at	21595	-9.9776	-2.55375	0.255948	0.170312	0	0
383	29150	NM_005248_at	29149	-9.96791	-2.0265	0.203303	0.245449	0	0
384	29155	NM_005253_at	29154	-9.9512	-1.8495	0.185857	0.277488	0	0
385	20848	NM_000072_at	20847	-9.92307	-2.68338	0.270419	0.155676	0	0
386	22565	NM_001006932_at	22564	-9.9053	-1.62446	0.163999	0.324331	0	0
387	36882	NM_024913_at	36881	-9.8989	-1.89157	0.191089	0.269513	0	0
388	37291	NM_030964_at	37290	-9.8941	-1.82807	0.184763	0.281642	0	0
389	35610	NM_021135_at	35609	-9.88844	-1.65542	0.16741	0.317445	0	0
390	38235	NM_033016_at	38234	-9.88795	-1.69077	0.170993	0.309762	0	0
391	35887	NM_021977_at	35886	-9.8826	-1.86242	0.188454	0.275015	0	0
392	30928	NM_007203_at	30927	-9.86952	-1.69313	0.171552	0.309255	0	0
393	21354	NM_000610_at	21353	-9.86464	-2.23846	0.226918	0.211913	0	0
394	25725	NM_001552_at	25724	-9.84659	-1.73785	0.176493	0.299816	0	0
395	37506	NM_031912_at	37505	-9.83177	-1.60643	0.163391	0.328411	0	0
396	46364	XM_001128652_at	46363	-9.82765	-2.0236	0.205909	0.245944	0	0
397	21760	NM_001001547_at	21759	-9.82125	-2.67238	0.272102	0.156868	0	0
398	25765	NM_001620_at	25764	-9.81334	-2.44338	0.248986	0.183852	0	0
399	21008	NM_000237_at	21007	-9.79558	-2.79961	0.285803	0.143626	0	0
400	31765	NM_014178_at	31764	-9.79311	-1.85323	0.189239	0.276771	0	0
401	34455	NM_018370_at	34454	-9.77957	-2.67331	0.273357	0.156766	0	0
402	21395	NM_000660_at	21394	-9.76373	-1.97376	0.202152	0.254589	0	0
403	28137	NM_004163_at	28136	-9.75453	-2.09257	0.214523	0.234463	0	0
404	44076	NM_201592_at	44075	-9.72225	-2.49915	0.257054	0.176881	0	0
405	29934	NM_006108_at	29933	-9.71966	-2.07127	0.213101	0.23795	0	0
406	30475	NM_006691_at	30474	-9.71574	-2.07537	0.213609	0.237274	0	0
407	39174	NM_130469_at	39173	-9.71357	-1.78255	0.183511	0.29067	0	0
408	21193	NM_000428_at	21192	-9.67795	-2.0562	0.212463	0.240448	0	0
409	39731	NM_138969_at	39730	-9.66733	-2.02592	0.209564	0.245549	0	0
410	42938	NM_182536_at	42937	-9.64147	-3.23967	0.336014	0.105867	0	0
411	40868	NM_152611_at	40867	-9.63314	-1.96297	0.203772	0.2565	0	0
412	21670	NM_000956_at	21669	-9.63281	-1.59792	0.165883	0.330353	0	0
413	26636	NM_002543_at	26635	-9.62954	-3.0545	0.317201	0.120366	0	0
414	26699	NM_002608_at	26698	-9.56925	-1.70874	0.178566	0.305926	0	0
415	43766	NM_198951_at	43765	-9.53562	-2.52922	0.265239	0.173232	0	0
416	23067	NM_001012635_at	23066	-9.53545	-1.75058	0.183586	0.297183	0	0
417	21672	NM_000958_at	21671	-9.53368	-1.91986	0.201376	0.264281	0	0
418	27031	NM_002960_at	27030	-9.52873	-2.04586	0.214704	0.242178	0	0
419	28957	NM_005037_at	28956	-9.52407	-2.53676	0.266353	0.172329	0	0
420	21623	NM_000908_at	21622	-9.52295	-1.83664	0.192865	0.279973	0	0
421	32812	NM_015472_at	32811	-9.50701	-2.29286	0.241175	0.204071	0	0
422	35225	NM_020482_at	35224	-9.50478	-1.86872	0.196609	0.273816	0	0
423	42527	NM_178565_at	42526	-9.50008	-1.75829	0.185082	0.295598	0	0
424	25645	NM_001460_at	25644	-9.49546	-3.28476	0.345929	0.10261	0	0
425	33954	NM_017791_at	33953	-9.4929	-1.81062	0.190734	0.285068	0	0
426	42689	NM_181519_at	42688	-9.45744	-1.63762	0.173156	0.321387	0	0
427	21724	NM_001001389_at	21723	-9.45688	-2.21915	0.23466	0.214768	0	0
428	4662	4074219_at	4661	-9.45589	-1.78462	0.188731	0.290252	0	0
429	44046	NM_201538_at	44045	-9.45103	-1.80102	0.190563	0.286972	0	0
430	30067	NM_006255_at	30066	-9.44392	-1.74083	0.184334	0.299196	0	0
431	5671	4078224_at	5670	-9.44159	-1.78344	0.188892	0.29049	0	0
432	44047	NM_201539_at	44046	-9.41176	-1.77792	0.188904	0.291603	0	0
433	18414	4127256_at	18413	-9.39726	-2.03069	0.216094	0.244739	0	0
434	44048	NM_201540_at	44047	-9.37121	-1.72218	0.183773	0.303091	0	0
435	44049	NM_201541_at	44048	-9.37117	-1.76017	0.187828	0.295213	0	0
436	31952	NM_014398_at	31951	-9.341	-3.16002	0.338296	0.111876	0	0
437	23582	NM_001024844_at	23581	-9.33524	-1.80306	0.193146	0.286565	0	0
438	28563	NM_004613_at	28562	-9.28605	-2.69776	0.290518	0.154132	0	0
439	32906	NM_015621_at	32905	-9.28238	-1.7273	0.186084	0.302016	0	0
440	26503	NM_002405_at	26502	-9.28217	-1.66369	0.179235	0.31563	0	0
441	33693	NM_017434_at	33692	-9.28142	-2.09994	0.226252	0.233269	0	0
442	23063	NM_001012631_at	23062	-9.27677	-1.65299	0.178186	0.317979	0	0
443	42197	NM_175940_at	42196	-9.27561	-2.14318	0.231056	0.22638	0	0
444	31283	NM_012302_at	31282	-9.24694	-2.68517	0.290384	0.155483	0	0
445	31314	NM_012335_at	31313	-9.23618	-1.86132	0.201525	0.275225	0	0
446	23066	NM_001012634_at	23065	-9.2274	-1.66323	0.180249	0.315731	0	0
447	43576	NM_198474_at	43575	-9.21906	-1.91766	0.20801	0.264684	0	0
448	25893	NM_001752_at	25892	-9.21424	-1.76663	0.191728	0.293895	0	0
449	41681	NM_173158_at	41680	-9.18684	-2.1984	0.239299	0.217879	0	0
450	39632	NM_138712_at	39631	-9.18393	-2.45869	0.267716	0.181912	0	0
451	43527	NM_198391_at	43526	-9.1628	-2.67164	0.291575	0.156948	0	0
452	26347	NM_002229_at	26346	-9.15407	-2.11667	0.231227	0.230579	0	0
453	41017	NM_152830_at	41016	-9.15177	-1.94373	0.212388	0.259944	0	0
454	33305	NM_016242_at	33304	-9.15124	-2.23615	0.244355	0.212252	0	0
455	27957	NM_003966_at	27956	-9.14929	-1.86252	0.20357	0.274996	0	0
456	38634	NM_052863_at	38633	-9.13696	-2.38306	0.260816	0.191702	0	0
457	15037	4114165_at	15036	-9.1156	-1.72572	0.189315	0.302348	0	0
458	21510	NM_000789_at	21509	-9.08189	-2.10464	0.231741	0.232508	0	0
459	26349	NM_002231_at	26348	-9.0815	-1.79978	0.19818	0.287219	0	0
460	27647	NM_003638_at	27646	-9.07899	-2.70081	0.297479	0.153807	0	0
461	30287	NM_006485_at	30286	-9.06732	-1.70111	0.187609	0.30755	0	0
462	32229	NM_014737_at	32228	-9.04902	-1.74076	0.19237	0.299213	0	0
463	29675	NM_005823_at	29674	-9.03547	-2.10637	0.233122	0.232231	0	0
464	31589	NM_013404_at	31588	-9.03547	-2.10637	0.233122	0.232231	0	0
465	27185	NM_003123_at	27184	-9.03277	-1.77779	0.196815	0.291631	0	0
466	7826	4086662_at	7825	-9.02159	-2.08187	0.230765	0.236208	0	0
467	21128	NM_000362_at	21127	-9.00356	-1.99428	0.221499	0.250993	0	0
468	23771	NM_001030288_at	23770	-8.98593	-1.6505	0.183676	0.31853	0	0
469	25993	NM_001860_at	25992	-8.98355	-1.77594	0.197688	0.292004	0	0
470	31486	NM_013281_at	31485	-8.98237	-2.51982	0.28053	0.174364	0	0
471	32940	NM_015675_at	32939	-8.98144	-2.06247	0.229637	0.239406	0	0
472	9488	4093165_at	9487	-8.96476	-1.79998	0.200784	0.287178	0	0
473	42552	NM_178822_at	42551	-8.93284	-2.40979	0.269768	0.188183	0	0
474	21333	NM_000587_at	21332	-8.93252	-3.09433	0.346412	0.117088	0	0
475	23065	NM_001012633_at	23064	-8.92719	-1.7939	0.200948	0.288391	0	0
476	23086	NM_001012718_at	23085	-8.92719	-1.7939	0.200948	0.288391	0	0
477	28192	NM_004221_at	28191	-8.92719	-1.7939	0.200948	0.288391	0	0
478	1109	4060386_at	1108	-8.92203	-2.08687	0.233901	0.23539	0	0
479	30888	NM_007161_at	30887	-8.89917	-1.91391	0.215065	0.265373	0	0
480	44045	NM_201537_at	44044	-8.88966	-1.77017	0.199127	0.293174	0	0
481	44044	NM_201536_at	44043	-8.88609	-1.80213	0.202803	0.286751	0	0
482	44268	NM_205839_at	44267	-8.88422	-2.03858	0.229461	0.243402	0	0
483	27076	NM_003006_at	27075	-8.86833	-1.75445	0.197834	0.296386	0	0
484	44043	NM_201535_at	44042	-8.86744	-1.72909	0.194994	0.301641	0	0
485	41485	NM_170774_at	41484	-8.85473	-1.76809	0.199677	0.293597	0	0
486	27075	NM_003005_at	27074	-8.85328	-1.95465	0.220783	0.257983	0	0
487	33312	NM_016250_at	33311	-8.85179	-1.75387	0.198137	0.296505	0	0
488	38242	NM_033027_at	38241	-8.84962	-2.53481	0.286431	0.172562	0	0
489	32008	NM_014461_at	32007	-8.84095	-1.68338	0.190407	0.311353	0	0
490	21011	NM_000240_at	21010	-8.827	-2.8761	0.32583	0.136209	0	0
491	24373	NM_001040114_at	24372	-8.79283	-2.37329	0.269911	0.193006	0	0
492	26567	NM_002474_at	26566	-8.79283	-2.37329	0.269911	0.193006	0	0
493	24372	NM_001040113_at	24371	-8.79272	-2.35593	0.267941	0.195342	0	0
494	36257	NM_022844_at	36256	-8.79272	-2.35593	0.267941	0.195342	0	0
495	43730	NM_198859_at	43729	-8.77048	-1.82871	0.208507	0.281516	0	0
496	3288	4068846_at	3287	-8.75353	-2.00232	0.228745	0.249597	0	0
497	19695	4132046_at	19694	-8.72825	-1.70099	0.194883	0.307575	0	0
498	26003	NM_001870_at	26002	-8.72401	-3.25497	0.373105	0.104751	0	0
499	33006	NM_015869_at	33005	-8.71495	-2.45688	0.281915	0.18214	0	0
500	44266	NM_205837_at	44265	-8.70199	-1.7959	0.206378	0.287992	0	0
501	29108	NM_005204_at	29107	-8.69567	-1.72814	0.198735	0.301842	0	0
502	23064	NM_001012632_at	23063	-8.69543	-1.89581	0.218024	0.268723	0	0
503	21975	NM_001002814_at	21974	-8.69384	-1.72009	0.197852	0.303529	0	0
504	20838	NM_000062_at	20837	-8.68796	-2.06591	0.23779	0.238836	0	0
505	23616	NM_001025077_at	23615	-8.66428	-1.96634	0.226948	0.255901	0	0
506	43461	NM_198234_at	43460	-8.66231	-1.84889	0.213441	0.277606	0	0
507	43462	NM_198235_at	43461	-8.66231	-1.84889	0.213441	0.277606	0	0
508	38130	NM_032866_at	38129	-8.6472	-1.89092	0.218674	0.269636	0	0
509	27006	NM_002933_at	27005	-8.64087	-1.84352	0.213349	0.278642	0	0
510	41995	NM_174896_at	41994	-8.63975	-2.32633	0.269258	0.199391	0	0
511	7437	4085147_at	7436	-8.62229	-1.5929	0.184742	0.331505	0	0
512	30354	NM_006561_at	30353	-8.62159	-1.92465	0.223236	0.263405	0	0
513	35499	NM_020980_at	35498	-8.61985	-2.6842	0.311398	0.155587	0	0
514	19683	4131990_at	19682	-8.61447	-2.56575	0.297842	0.168901	0	0
515	26249	NM_002126_at	26248	-8.61076	-1.82488	0.21193	0.282264	0	0
516	50433	XM_936336_at	50432	-8.59172	-1.80289	0.20984	0.2866	0	0
517	39631	NM_138711_at	39630	-8.59021	-2.4027	0.279702	0.189111	0	0
518	17508	4123716_at	17507	-8.58716	-2.5929	0.301951	0.165752	0	0
519	39344	NM_133477_at	39343	-8.58081	-1.80697	0.210583	0.285791	0	0
520	12154	4103298_at	12153	-8.57847	-1.59892	0.186387	0.330125	0	0
521	24814	NM_001076778_at	24813	-8.56672	-1.97766	0.230854	0.253901	0	0
522	29250	NM_005358_at	29249	-8.56539	-2.49235	0.290979	0.177716	0	0
523	40877	NM_152621_at	40876	-8.56141	-2.95477	0.345126	0.128981	0	0
524	21677	NM_000963_at	21676	-8.56106	-2.90099	0.338858	0.13388	0	0
525	29435	NM_005556_at	29434	-8.55726	-2.03773	0.238129	0.243547	0	0
526	44267	NM_205838_at	44266	-8.55488	-2.20305	0.25752	0.217177	0	0
527	44269	NM_205840_at	44268	-8.55488	-2.20305	0.25752	0.217177	0	0
528	7415	4085038_at	7414	-8.54112	-1.90007	0.222461	0.267931	0	0
529	25412	NM_001200_at	25411	-8.53027	-1.77492	0.208073	0.29221	0	0
530	23870	NM_001032295_at	23869	-8.49068	-2.1011	0.247459	0.233081	0	0
531	6113	4080042_at	6112	-8.49054	-1.72382	0.203029	0.302745	0	0
532	21264	NM_000507_at	21263	-8.48918	-2.49245	0.293604	0.177704	0	0
533	27856	NM_003856_at	27855	-8.48558	-3.49976	0.412436	0.0884029	0	0
534	23615	NM_001025076_at	23614	-8.48136	-1.88105	0.221786	0.271486	0	0
535	21725	NM_001001390_at	21724	-8.47309	-2.07998	0.245481	0.236518	0	0
536	23068	NM_001012636_at	23067	-8.46812	-2.03081	0.239818	0.244718	0	0
537	554	4058331_at	553	-8.46653	-2.60481	0.307659	0.16439	0	0
538	43460	NM_198232_at	43459	-8.45421	-1.74884	0.20686	0.297542	0	0
539	21432	NM_000698_at	21431	-8.44404	-2.29911	0.272276	0.203188	0	0
540	34379	NM_018286_at	34378	-8.42568	-3.4208	0.405997	0.0933763	0	0
541	27989	NM_003999_at	27988	-8.41629	-2.22659	0.264557	0.213663	0	0
542	33561	NM_016582_at	33560	-8.40313	-2.07739	0.247217	0.236942	0	0
543	30903	NM_007177_at	30902	-8.37841	-1.93133	0.230513	0.262187	0	0
544	13869	4109803_at	13868	-8.37577	-1.86982	0.223242	0.273607	0	0
545	45917	XM_001127464_at	45916	-8.34672	-2.35703	0.28239	0.195192	0	0
546	30288	NM_006486_at	30287	-8.32697	-1.86727	0.224244	0.274091	0	0
547	11192	4099544_at	11191	-8.32006	-2.4878	0.299013	0.178278	0	0
548	578	4058410_at	577	-8.31128	-2.11668	0.254675	0.230578	0	0
549	17185	4122398_at	17184	-8.30743	-1.65104	0.198743	0.31841	0	0
550	12941	4106253_at	12940	-8.30324	-1.85816	0.223788	0.275827	0	0
551	26066	NM_001935_at	26065	-8.29999	-1.76806	0.213019	0.293603	0	0
552	33298	NM_016232_at	33297	-8.27507	-2.55085	0.308258	0.170654	0	0
553	28748	NM_004815_at	28747	-8.2712	-2.17929	0.26348	0.220784	0	0
554	51671	XM_942780_at	51670	-8.26873	-1.95879	0.236892	0.257244	0	0
555	30229	NM_006424_at	30228	-8.265	-3.82803	0.463162	0.0704122	0	0
556	42265	NM_177414_at	42264	-8.26206	-2.04291	0.247264	0.242674	0	0
557	14115	4110762_at	14114	-8.24907	-2.63486	0.319413	0.161001	0	0
558	36037	NM_022343_at	36036	-8.23793	-1.92633	0.233837	0.263097	0	0
559	14914	4113754_at	14913	-8.23445	-1.72834	0.209891	0.301799	0	0
560	2388	4065315_at	2387	-8.23393	-1.98321	0.240859	0.252926	0	0
561	27948	NM_003955_at	27947	-8.23018	-2.47395	0.300595	0.179998	0	0
562	30984	NM_007268_at	30983	-8.2234	-3.00369	0.365261	0.124681	0	0
563	25914	NM_001774_at	25913	-8.21298	-2.15916	0.262896	0.223887	0	0
564	24347	NM_001040031_at	24346	-8.21178	-2.13883	0.260459	0.227063	0	0
565	34979	NM_020130_at	34978	-8.20069	-1.83995	0.224366	0.279331	0	0
566	17851	4125067_at	17850	-8.19777	-1.65348	0.201698	0.317873	0	0
567	5328	4076812_at	5327	-8.18372	-2.18756	0.267307	0.219522	0	0
568	39331	NM_133459_at	39330	-8.18219	-1.71814	0.209986	0.30394	0	0
569	22457	NM_001005505_at	22456	-8.18037	-2.02574	0.247635	0.245578	0	0
570	29863	NM_006030_at	29862	-8.18037	-2.02574	0.247635	0.245578	0	0
571	30289	NM_006487_at	30288	-8.17712	-1.70022	0.207924	0.307739	0	0
572	21668	NM_000954_at	21667	-8.16807	-2.54365	0.311414	0.171508	0	0
573	27718	NM_003713_at	27717	-8.16211	-1.93448	0.237007	0.261616	0	0
574	8107	4087792_at	8106	-8.15822	-1.89583	0.232383	0.268719	0	0
575	33772	NM_017565_at	33771	-8.15488	-1.61641	0.198214	0.326145	0	0
576	25440	NM_001233_at	25439	-8.15027	-2.85818	0.350685	0.137912	0	0
577	11949	4102438_at	11948	-8.14427	-1.63269	0.200472	0.322485	0	0
578	43721	NM_198843_at	43720	-8.13332	-3.69362	0.454134	0.0772878	0	0
579	275	4057289_at	274	-8.12399	-1.60072	0.197037	0.329712	0	0
580	2211	4064644_at	2210	-8.106	-1.8607	0.229546	0.275343	0	0
581	41149	NM_153206_at	41148	-8.10168	-2.58459	0.319019	0.16671	0	0
582	19325	4130615_at	19324	-8.10032	-2.26112	0.27914	0.20861	0	0
583	26257	NM_002135_at	26256	-8.09711	-2.25828	0.2789	0.209021	0	0
584	18619	4128002_at	18618	-8.09502	-1.62013	0.200138	0.325307	0	0
585	9363	4092693_at	9362	-8.09382	-2.20445	0.272362	0.216967	0	0
586	32032	NM_014485_at	32031	-8.08604	-1.96467	0.24297	0.256199	0	0
587	29932	NM_006106_at	29931	-8.08445	-1.60794	0.198893	0.328066	0	0
588	43449	NM_198212_at	43448	-8.07534	-2.78365	0.34471	0.145224	0	0
589	30602	NM_006829_at	30601	-8.07022	-1.61396	0.19999	0.3267	0	0
590	33300	NM_016234_at	33299	-8.06923	-2.33736	0.289664	0.197871	0	0
591	5755	4078600_at	5754	-8.05662	-1.94621	0.241566	0.259498	0	0
592	3282	4068819_at	3281	-8.05577	-2.5024	0.310635	0.176483	0	0
593	10884	4098357_at	10883	-8.05486	-1.68807	0.209571	0.310343	0	0
594	41680	NM_173157_at	41679	-8.0542	-2.24951	0.279297	0.210295	0	0
595	16548	4119841_at	16547	-8.05409	-2.06944	0.256943	0.238252	0	0
596	7855	4086771_at	7854	-8.03635	-2.0279	0.252341	0.245212	0	0
597	5243	4076490_at	5242	-8.03588	-3.46758	0.431512	0.0903973	0	0
598	21374	NM_000632_at	21373	-8.03112	-1.70396	0.21217	0.306942	0	0
599	23139	NM_001013254_at	23138	-8.02417	-1.89268	0.235872	0.269306	0	0
600	2832	4067119_at	2831	-8.01893	-2.96696	0.369995	0.127896	0	0
601	26851	NM_002773_at	26850	-8.00559	-1.77732	0.22201	0.291725	0	0
602	23918	NM_001033049_at	23917	-7.99709	-1.73527	0.216988	0.300353	0	0
603	6633	4082004_at	6632	-7.99006	-3.13702	0.392615	0.113675	0	0
604	21198	NM_000433_at	21197	-7.98145	-2.63115	0.329658	0.161415	0	0
605	25634	NM_001449_at	25633	-7.97501	-2.34242	0.29372	0.197179	0	0
606	35231	NM_020529_at	35230	-7.97464	-1.87781	0.235472	0.272097	0	0
607	2758	4066814_at	2757	-7.9733	-1.80135	0.225923	0.286905	0	0
608	39386	NM_133650_at	39385	-7.96829	-1.79775	0.225613	0.287623	0	0
609	21726	NM_001001391_at	21725	-7.96721	-2.01834	0.25333	0.246843	0	0
610	10737	4097800_at	10736	-7.96164	-1.89449	0.237952	0.268969	0	0
611	16283	4118889_at	16282	-7.95051	-1.65925	0.208697	0.316604	0	0
612	34467	NM_018384_at	34466	-7.94593	-2.03812	0.256499	0.243481	0	0
613	14367	4111708_at	14366	-7.94243	-1.70581	0.214772	0.306548	0	0
614	20066	4133343_at	20065	-7.93768	-1.7595	0.221664	0.295351	0	0
615	22113	NM_001004065_at	22112	-7.93013	-2.26405	0.285499	0.208187	0	0
616	44178	NM_203380_at	44177	-7.92845	-2.32019	0.292641	0.200241	0	0
617	38706	NM_052954_at	38705	-7.92463	-1.69002	0.213262	0.309922	0	0
618	44177	NM_203379_at	44176	-7.9162	-2.39448	0.302479	0.19019	0	0
619	23429	NM_001018011_at	23428	-7.90549	-2.76069	0.349212	0.147553	0	0
620	21937	NM_001002236_at	21936	-7.90439	-2.8036	0.354689	0.14323	0	0
621	14981	4113957_at	14980	-7.90218	-2.0502	0.259447	0.241451	0	0
622	25331	NM_001112_at	25330	-7.89428	-1.80334	0.228437	0.28651	0	0
623	3566	4069867_at	3565	-7.89404	-1.6799	0.212807	0.312103	0	0
624	20620	4135555_at	20619	-7.88486	-2.06961	0.262479	0.238224	0	0
625	15169	4114717_at	15168	-7.88031	-2.1644	0.274659	0.223075	0	0
626	48678	XM_001134464_at	48677	-7.85998	-1.64213	0.208923	0.320384	0	0
627	18058	4125799_at	18057	-7.84917	-1.75536	0.223636	0.296199	0	0
628	27035	NM_002964_at	27034	-7.84798	-2.73362	0.348322	0.150348	0	0
629	48806	XM_114303_at	48805	-7.84395	-1.63876	0.20892	0.321133	0	0
630	32629	NM_015230_at	32628	-7.84391	-1.7904	0.228254	0.289092	0	0
631	18589	4127896_at	18588	-7.84128	-2.46184	0.313959	0.181514	0	0
632	38505	NM_033439_at	38504	-7.84021	-1.68932	0.215469	0.310072	0	0
633	21433	NM_000700_at	21432	-7.83763	-2.38256	0.30399	0.191768	0	0
634	4828	4074878_at	4827	-7.83254	-2.32013	0.296216	0.20025	0	0
635	20473	4135019_at	20472	-7.83127	-1.7331	0.221305	0.300805	0	0
636	34173	NM_018058_at	34172	-7.81877	-1.63158	0.208675	0.322735	0	0
637	27088	NM_003018_at	27087	-7.81794	-4.59764	0.588088	0.0413022	0	0
638	27304	NM_003264_at	27303	-7.81384	-1.64183	0.210118	0.320449	0	0
639	1803	4062999_at	1802	-7.81134	-1.92659	0.24664	0.263051	0	0
640	18543	4127739_at	18542	-7.80694	-2.34944	0.300942	0.196223	0	0
641	25942	NM_001803_at	25941	-7.8014	-2.58551	0.331416	0.166604	0	0
642	34516	NM_018440_at	34515	-7.79429	-1.70417	0.218643	0.306899	0	0
643	1244	4060875_at	1243	-7.79317	-2.45199	0.314633	0.182759	0	0
644	3520	4069708_at	3519	-7.79269	-2.11933	0.271964	0.230153	0	0
645	5714	4078417_at	5713	-7.79099	-2.05756	0.264094	0.240223	0	0
646	18616	4127994_at	18615	-7.78761	-2.26041	0.290257	0.208712	0	0
647	16012	4117901_at	16011	-7.78692	-1.83034	0.235053	0.281198	0	0
648	26442	NM_002339_at	26441	-7.77285	-1.81179	0.233093	0.284837	0	0
649	39833	NM_139182_at	39832	-7.77229	-1.61884	0.208284	0.325597	0	0
650	29841	NM_006006_at	29840	-7.76282	-2.5216	0.324831	0.174149	0	0
651	5666	4078169_at	5665	-7.76184	-1.76823	0.22781	0.29357	0	0
652	37812	NM_032385_at	37811	-7.7608	-1.72223	0.221913	0.303081	0	0
653	10103	4095378_at	10102	-7.7586	-1.85949	0.239667	0.275575	0	0
654	21727	NM_001001392_at	21726	-7.74417	-1.96747	0.254058	0.255701	0	0
655	21273	NM_000518_at	21272	-7.7379	-3.54184	0.457726	0.0858617	0	0
656	32985	NM_015833_at	32984	-7.72066	-1.71647	0.222321	0.304293	0	0
657	16571	4119937_at	16570	-7.71852	-2.30828	0.299057	0.201901	0	0
658	21191	NM_000426_at	21190	-7.71112	-1.9322	0.250574	0.262029	0	0
659	24995	NM_001079823_at	24994	-7.71112	-1.9322	0.250574	0.262029	0	0
660	41120	NM_153026_at	41119	-7.70046	-1.59926	0.207684	0.330046	0	0
661	19512	4131337_at	19511	-7.69921	-1.60077	0.207914	0.3297	0	0
662	48243	XM_001133377_at	48242	-7.69843	-2.84601	0.369687	0.139081	0	0
663	28349	NM_004390_at	28348	-7.69682	-2.4965	0.324354	0.177207	0	0
664	26125	NM_001996_at	26124	-7.68549	-1.67361	0.217762	0.313469	0	0
665	23138	NM_001013253_at	23137	-7.6828	-1.93058	0.251285	0.262325	0	0
666	20445	4134881_at	20444	-7.68253	-1.97187	0.25667	0.254922	0	0
667	3272	4068779_at	3271	-7.68016	-1.72705	0.224872	0.302068	0	0
668	21575	NM_000856_at	21574	-7.66436	-1.89476	0.247216	0.268919	0	0
669	21297	NM_000542_at	21296	-7.65776	-3.71001	0.484477	0.0764145	0	0
670	32986	NM_015834_at	32985	-7.65513	-1.72204	0.224953	0.303119	0	0
671	26530	NM_002432_at	26529	-7.64669	-1.62006	0.211864	0.325322	0	0
672	27678	NM_003670_at	27677	-7.64657	-1.82267	0.238365	0.282697	0	0
673	26076	NM_001945_at	26075	-7.62859	-2.10897	0.276456	0.231813	0	0
674	8625	4089884_at	8624	-7.62829	-2.02795	0.265845	0.245204	0	0
675	18476	4127495_at	18475	-7.62698	-1.58643	0.208002	0.332995	0	0
676	26145	NM_002017_at	26144	-7.62687	-1.63374	0.214209	0.322252	0	0
677	43159	NM_182961_at	43158	-7.62665	-2.13444	0.279866	0.227757	0	0
678	30973	NM_007256_at	30972	-7.62574	-2.05141	0.269011	0.241249	0	0
679	25540	NM_001343_at	25539	-7.6207	-1.97786	0.259538	0.253866	0	0
680	10902	4098429_at	10901	-7.61141	-1.68142	0.220908	0.311775	0	0
681	25366	NM_001150_at	25365	-7.6037	-2.16224	0.284366	0.22341	0	0
682	23140	NM_001013255_at	23139	-7.59985	-2.04889	0.269595	0.241671	0	0
683	40547	NM_148979_at	40546	-7.58843	-2.52786	0.33312	0.173396	0	0
684	1918	4063469_at	1917	-7.58805	-1.8329	0.241552	0.280699	0	0
685	38274	NM_033071_at	38273	-7.58696	-2.11658	0.278976	0.230593	0	0
686	26502	NM_002404_at	26501	-7.58438	-2.59103	0.341628	0.165967	0	0
687	43470	NM_198252_at	43469	-7.58398	-1.60399	0.211497	0.328966	0	0
688	30240	NM_006435_at	30239	-7.57942	-1.91882	0.253162	0.26447	0	0
689	9460	4093064_at	9459	-7.57305	-2.2627	0.298783	0.208382	0	0
690	15719	4116832_at	15718	-7.56203	-2.07024	0.273768	0.238119	0	0
691	36008	NM_022152_at	36007	-7.53875	-1.85178	0.245635	0.277049	0	0
692	1020	4060059_at	1019	-7.52963	-2.47919	0.329258	0.179345	0	0
693	21207	NM_000442_at	21206	-7.52775	-2.25154	0.299099	0.209999	0	0
694	4190	4072279_at	4189	-7.52593	-2.79388	0.371234	0.144198	0	0
695	15423	4115657_at	15422	-7.51752	-1.81133	0.240948	0.284929	0	0
696	5931	4079339_at	5930	-7.50829	-2.37235	0.315964	0.193131	0	0
697	12197	4103480_at	12196	-7.49883	-2.79366	0.372546	0.144219	0	0.0165216
698	6378	4081089_at	6377	-7.4939	-1.92427	0.256778	0.263474	0	0.0260014
699	4386	4073044_at	4385	-7.49384	-1.8406	0.245616	0.279205	0	0.0261137
700	1267	4060939_at	1266	-7.49237	-2.47409	0.330215	0.17998	0	0.0289566
701	2102	4064189_at	2101	-7.49233	-1.61384	0.2154	0.326727	0	0.029032
702	20578	4135401_at	20577	-7.49215	-3.20158	0.427324	0.1087	0	0.0293772
703	5186	4076237_at	5185	-7.48895	-2.8376	0.378905	0.139893	0	0.0355565
704	11490	4100650_at	11489	-7.47408	-1.85914	0.248745	0.27564	0	0.0644232
705	18576	4127858_at	18575	-7.46569	-1.82385	0.244297	0.282467	0	0.0808347
706	21072	NM_000304_at	21071	-7.46275	-2.35861	0.316051	0.194979	0	0.086619
707	27315	NM_003277_at	27314	-7.458	-1.66037	0.22263	0.316357	0	0.0959691
708	16811	4120972_at	16810	-7.45355	-2.5139	0.337276	0.175082	0	0.104745
709	7830	4086674_at	7829	-7.44743	-3.05866	0.4107	0.120019	0	0.116868
710	3583	4069929_at	3582	-7.44727	-1.8912	0.253945	0.269582	0	0.117181
711	46076	XM_001127869_at	46075	-7.44211	-1.94149	0.26088	0.260347	0	0.12745
712	7586	4085756_at	7585	-7.44172	-1.58627	0.213159	0.333032	0	0.128231
713	12913	4106157_at	12912	-7.43814	-1.87623	0.252244	0.272395	0	0.13536
714	10037	4095140_at	10036	-7.43581	-2.17629	0.292677	0.221244	0	0.140027
715	6863	4082932_at	6862	-7.43374	-2.41186	0.324448	0.187914	0	0.144168
716	21016	NM_000246_at	21015	-7.42661	-1.74709	0.235247	0.297902	0	0.158466
717	9457	4093053_at	9456	-7.41231	-1.62518	0.219255	0.324169	0	0.187373
718	43385	NM_198057_at	43384	-7.40822	-1.68893	0.227981	0.310156	0	0.19568
719	25514	NM_001311_at	25513	-7.40607	-1.82275	0.246115	0.282682	0	0.20006
720	32677	NM_015293_at	32676	-7.40551	-2.07877	0.280706	0.236715	0	0.20119
721	38824	NM_057159_at	38823	-7.4042	-1.78578	0.241185	0.290019	0	0.203864
722	13142	4107044_at	13141	-7.39879	-1.74716	0.236141	0.297888	0	0.214917
723	41216	NM_153321_at	41215	-7.39511	-2.34333	0.316876	0.197054	0	0.222466
724	10447	4096649_at	10446	-7.39131	-1.69958	0.229942	0.307877	0	0.230264
725	26922	NM_002845_at	26921	-7.39119	-2.07452	0.280674	0.237415	0	0.230518
726	6626	4081972_at	6625	-7.39076	-2.60709	0.35275	0.16413	0	0.231406
727	5753	4078592_at	5752	-7.39056	-2.3338	0.315781	0.198361	0	0.231825
728	19597	4131675_at	19596	-7.38736	-2.17188	0.293999	0.221922	0	0.238403
729	25300	NM_001083116_at	25299	-7.38247	-1.81428	0.245755	0.284347	0	0.248506
730	28961	NM_005041_at	28960	-7.38247	-1.81428	0.245755	0.284347	0	0.248506
731	2116	4064238_at	2115	-7.37917	-2.57317	0.348708	0.168034	0	0.255335
732	10551	4097102_at	10550	-7.37776	-1.62894	0.220791	0.323325	0	0.258263
733	2331	4065068_at	2330	-7.37569	-1.72201	0.233471	0.303127	0	0.262571
734	27132	NM_003064_at	27131	-7.37483	-3.36399	0.456145	0.0971267	0	0.264355
735	16340	4119086_at	16339	-7.37064	-1.83552	0.249031	0.280191	0	0.273065
736	6181	4080348_at	6180	-7.35696	-1.88243	0.25587	0.271227	0	0.301688
737	12955	4106308_at	12954	-7.3566	-2.78816	0.379002	0.14477	0	0.30246
738	981	4059901_at	980	-7.35545	-1.66432	0.22627	0.315493	0	0.304876
739	19897	4132779_at	19896	-7.34728	-1.78936	0.24354	0.289301	0	0.322112
740	8498	4089376_at	8497	-7.33935	-2.7694	0.377336	0.146665	0	0.338919
741	29896	NM_006065_at	29895	-7.33743	-1.67972	0.228925	0.312143	0	0.342986
742	43409	NM_198129_at	43408	-7.3367	-1.87855	0.256049	0.271956	0	0.344548
743	19828	4132523_at	19827	-7.33389	-2.76139	0.376525	0.147482	0	0.350529
744	31621	NM_013451_at	31620	-7.31311	-1.85005	0.252977	0.277383	0	0.395133
745	45291	XM_001125822_at	45290	-7.30842	-2.15272	0.294553	0.224888	0	0.405258
746	26286	NM_002165_at	26285	-7.3065	-1.87325	0.256382	0.272958	0	0.409435
747	18713	4128341_at	18712	-7.3057	-2.39807	0.328246	0.189718	0	0.411155
748	899	4059628_at	898	-7.30526	-1.82411	0.249698	0.282416	0	0.41211
749	24625	NM_001042545_at	24624	-7.30375	-1.85944	0.254588	0.275583	0	0.415395
750	13928	4110011_at	13927	-7.30336	-1.98831	0.272245	0.252035	0	0.416244
751	474	4058034_at	473	-7.30114	-2.01056	0.275377	0.248176	0	0.421073
752	6188	4080373_at	6187	-7.29931	-1.64824	0.225808	0.319028	0	0.425063
753	631	4058591_at	630	-7.29837	-1.97905	0.271163	0.253658	0	0.427094
754	11822	4101896_at	11821	-7.29452	-2.82121	0.386758	0.141492	0	0.435494
755	15732	4116894_at	15731	-7.29161	-2.52477	0.346257	0.173767	0	0.441856
756	9404	4092855_at	9403	-7.29106	-2.583	0.35427	0.166893	0	0.443058
757	3047	4067983_at	3046	-7.28367	-3.45388	0.474195	0.0912598	0	0.459283
758	41217	NM_153322_at	41216	-7.28321	-2.37241	0.325737	0.193123	0	0.460283
759	19236	4130294_at	19235	-7.28037	-1.85854	0.25528	0.275756	0	0.466539
760	4329	4072825_at	4328	-7.27812	-1.6774	0.230472	0.312645	0	0.471514
761	39293	NM_133337_at	39292	-7.27539	-1.84688	0.253853	0.277992	0	0.477524
762	30861	NM_007124_at	30860	-7.26448	-2.06723	0.284567	0.238617	0	0.501719
763	1740	4062750_at	1739	-7.25784	-2.70971	0.373349	0.152861	0	0.516525
764	12879	4106031_at	12878	-7.25724	-2.20758	0.304191	0.216496	0	0.517876
765	38083	NM_032812_at	38082	-7.25556	-2.04567	0.281946	0.242209	0	0.521634
766	9309	4092457_at	9308	-7.25159	-3.54515	0.488878	0.0856652	0	0.530508
767	13429	4108102_at	13428	-7.25137	-2.10488	0.290274	0.23247	0	0.531013
768	19880	4132702_at	19879	-7.24963	-1.88781	0.260401	0.270217	0	0.534916
769	22655	NM_001007469_at	22654	-7.23916	-2.01041	0.277713	0.248203	0	0.558502
770	31835	NM_014266_at	31834	-7.23916	-2.01041	0.277713	0.248203	0	0.558502
771	1397	4061474_at	1396	-7.23592	-1.59624	0.2206	0.330737	0	0.565812
772	40067	NM_144765_at	40066	-7.23285	-2.05741	0.284453	0.240247	0	0.572773
773	17769	4124769_at	17768	-7.23219	-1.86455	0.257813	0.274609	0	0.574272
774	11737	4101591_at	11736	-7.228	-2.23573	0.309315	0.212314	0	0.583795
775	1574	4062113_at	1573	-7.22465	-1.79342	0.248236	0.288488	0	0.591421
776	27585	NM_003573_at	27584	-7.22372	-1.83683	0.254277	0.279936	0	0.593528
777	25766	NM_001621_at	25765	-7.21793	-2.05755	0.285061	0.240223	0	0.606757
778	3098	4068137_at	3097	-7.2178	-2.66831	0.369684	0.157311	0	0.607066
779	16976	4121609_at	16975	-7.2172	-2.4999	0.34638	0.176789	0	0.608432
780	22066	NM_001003794_at	22065	-7.21698	-1.72574	0.239121	0.302344	0	0.608926
781	2306	4064987_at	2305	-7.20778	-1.7158	0.238048	0.304434	0	0.630054
782	7316	4084649_at	7315	-7.20737	-2.19879	0.305075	0.21782	0	0.630991
783	42633	NM_181353_at	42632	-7.20494	-1.82574	0.253401	0.282097	0	0.6366
784	2328	4065059_at	2327	-7.20489	-1.8015	0.250038	0.286877	0	0.636715
785	24624	NM_001042544_at	24623	-7.20451	-1.80916	0.251115	0.285357	0	0.637589
786	17391	4123237_at	17390	-7.20236	-3.55685	0.493844	0.0849733	0	0.642546
787	45794	XM_001127146_at	45793	-7.20067	-3.15867	0.438663	0.111981	0	0.646458
788	6671	4082205_at	6670	-7.188	-2.18599	0.304117	0.219761	0	0.675857
789	1189	4060614_at	1188	-7.17467	-1.98128	0.27615	0.253264	0	0.707039
790	307	4057422_at	306	-7.16349	-2.75947	0.385213	0.147679	0	0.733376
791	26527	NM_002429_at	26526	-7.16011	-2.45752	0.343223	0.18206	0	0.741368
792	8838	4090656_at	8837	-7.15221	-2.73002	0.381703	0.150724	0	0.760119
793	29663	NM_005807_at	29662	-7.15054	-2.18691	0.305838	0.219621	0	0.76409
794	3920	4071295_at	3919	-7.13948	-1.71974	0.240878	0.303603	0	0.790521
795	29654	NM_005797_at	29653	-7.13878	-2.18022	0.305406	0.220641	0	0.792196
796	31945	NM_014391_at	31944	-7.13574	-2.88338	0.404075	0.135524	0	0.799493
797	30773	NM_007021_at	30772	-7.1345	-1.96504	0.275428	0.256132	0	0.802468
798	27956	NM_003965_at	27955	-7.1344	-1.60174	0.224509	0.32948	0	0.802708
799	45370	XM_001126047_at	45369	-7.1344	-1.60174	0.224509	0.32948	0	0.802708
800	2528	4065894_at	2527	-7.12753	-2.57369	0.361092	0.167974	0	0.819273
801	11178	4099495_at	11177	-7.1266	-2.25532	0.316466	0.20945	0	0.82152
802	4476	4073437_at	4475	-7.12539	-2.79044	0.39162	0.144542	0	0.82443
803	16119	4118292_at	16118	-7.12305	-2.41537	0.339092	0.187457	0	0.830093
804	7906	4086993_at	7905	-7.12208	-1.7484	0.245491	0.297631	0	0.832446
805	13652	4108986_at	13651	-7.12198	-1.8452	0.259085	0.278317	0	0.832686
806	15788	4117095_at	15787	-7.11916	-1.71242	0.240537	0.305147	0	0.839506
807	25612	NM_001424_at	25611	-7.11077	-1.8171	0.255542	0.283791	0	0.859916
808	17136	4122242_at	17135	-7.10967	-1.61888	0.227702	0.325587	0	0.862592
809	7620	4085918_at	7619	-7.10129	-1.79158	0.25229	0.288855	0	0.883077
810	11042	4099026_at	11041	-7.09388	-2.13351	0.300753	0.227903	0	0.90128
811	12011	4102706_at	12010	-7.09338	-1.99777	0.281638	0.250387	0	0.902529
812	37394	NM_031419_at	37393	-7.09036	-1.83504	0.258808	0.280283	0	0.90996
813	480	4058059_at	479	-7.08543	-1.80837	0.255223	0.285514	0	0.922129
814	13390	4107943_at	13389	-7.07601	-1.90328	0.268977	0.267334	0	0.945491
815	29441	NM_005562_at	29440	-7.07183	-1.66243	0.235077	0.315907	0	0.955898
816	26233	NM_002110_at	26232	-7.06569	-1.78761	0.252999	0.289651	0	0.971238
817	733	4059019_at	732	-7.0649	-1.63958	0.232073	0.320951	0	0.973213
818	12568	4104867_at	12567	-7.06054	-2.82376	0.399936	0.141242	0	0.984152
819	14955	4113871_at	14954	-7.05611	-1.87891	0.266281	0.271889	0	0.995266
820	11933	4102360_at	11932	-7.0548	-1.72307	0.244241	0.302902	0	0.998561
