# Supplementary material for: Identification of Lung-Cancer-Related Genes with the Shortest Path Approach in a Protein-Protein Interaction Network
Source: Biomed Res Int. 2013 May 22;2013:267375. doi: 10.1155/2013/267375 (PMC3674655; doi:10.1155/2013/267375)
Supplement: Supplementary file 1 — Additional file S1: This file contains two sheets. The first one shows 54 NSCLC related genes compiled from KEGG and corresponding Ensembl protein ID. The second one shows 84 SCLC related genes compiled from KEGG and corresponding Ensembl protein ID. Additional file S2: This file contains four sheets. The first one shows the 1918 overexpressed probes in NSCLC compared with normal tissues identified from gene expression array GSE40275. The second one shows the 2243 downexpressed probes in NSCLC. The third one shows the 819 overexpressed probes in SCLC. The fourth one shows the 820 downexpressed probes in SCLC. Additional file S3: This file contains five gene sets. The first one is the total 1825 differentially expressed NSCLC genes corresponding to the differentially expressed probes listed in Additional file S2. The second one is the total 1063 SCLC differentially expressed genes corresponding to the differentially expressed probes listed in Additional file S2. The third one is the 25 NSCLC shortest path genes. The fourth one is the 38 SCLC shortest path genes. The fifth one is the 742 cancer genes. Additional file S4: 1711 shortest paths between 54 NSCLC genes and 3916 shortest paths between 84 SCLC genes. Additional file S5: This file contains two sheets. The first one shows the 114 NSCLC shortest path genes with p-value. The second one shows the 161 SCLC shortest path genes with p-value. Additional file S6: This file contains two sheets. The first one shows the GO enrichment result of 25 NSCLC shortest path genes. The second one shows the GO enrichment result of 38 SCLC shortest path genes. [file 267375.f1.zip › Additional file/Additional file S3.xlsx]

## Sheet: Sheet1
NSCLC DEG	SCLC DEG	our NSCLC gene	our SCLC gene	742 cancer gene
ABCA3	ABCA3	ABCA1	ABCA1	ABCA1
ABCG1	ABCA8	AKT1	AKT1	ABCA3
ABTB1	ABI3BP	AKT2	AKT2	ABCB10
ACBD5	ACADL	AKT3	AKT3	ABCB11
ACE	ACBD7	ARAF	APAF1	ABCB6
ACP5	ACE	BAD	BBC3	ABCB8
ACTL6A	ACN9	BLNK	BCL2	ABI1
ACTR1A	ACSL5	BRAF	BCL2L1	ABL1
ACVRL1	ACTL6A	BTK	BIRC2	ABL2
ADAMTS8	ACVRL1	CASP9	BIRC3	ABP1
ADARB1	ACY1L2	CBLB	C17orf57	ACADM
ADCY9	ADAM22	CCND1	CASP9	ACIN1
ADH1B	ADAMTS1	CCND3	CBLB	ACSL3
ADRBK1	ADAMTSL3	CDK4	CCNA2	ACSL5
ADSS	ADARB1	CDK6	CCNB1	ACSL6
AES	ADCY4	CDKN2A	CCND1	ACVR1B
AFTPH	ADD2	CYP11A1	CCND3	ADAM12
AGER	ADH1A	DUSP1	CCNE1	ADAM19
AGK	ADH1B	E2F1	CCNE2	ADAMTS18
AGPAT2	ADRB2	E2F2	CD40	ADAMTS19
AGPS	AGER	E2F3	CDC25C	ADAMTSL3
AHCTF1	AGPAT5	EGF	CDK2	AFF1
AHNAK	AHNAK	EGFR	CDK4	AFF3
AIP	AHR	ERBB2	CDK6	AFF4
AK2	AKAP2	ESR1	CDKN1B	AIM1
AKAP9	ALDH2	FDX1	CDKN2B	AKAP12
AKT1	ALMS1	FDXR	CHEK1	AKAP6
ALDH1B1	ALOX15B	FHIT	CHUK	AKAP9
ALDH2	ALOX5	FOXO3	CKS1B	AKT1
ALG8	ALOX5AP	GAB1	COL17A1	AKT2
ALOX5	ALPL	GJA1	COL4A1	ALK
AMZ2	AMICA1	GRB2	COL4A2	ALS2CL
ANGPT2	ANGPT1	HRAS	COL4A3	AMFR
ANKIB1	ANKRD1	HSP90AA1	COL4A4	APC
ANKRD12	ANKRD25	IGF1R	COL4A5	AR
ANKRD17	ANKRD29	IRS1	COL4A6	ARFGAP3
ANKRD25	ANKRD32	KRAS	CRK	ARFGEF2
ANKRD49	ANLN	LAT	CYCS	ARHGAP25
ANLN	ANP32E	MAP2K1	CYP20A1	ARHGAP26
ANP32A	ANPEP	MAP2K2	DAG1	ARHGEF1
ANP32B	ANXA1	MAPK1	DECR1	ARHGEF10
ANP32E	ANXA3	MAPK3	DIABLO	ARHGEF12
ANXA6	AOC3	NCF1	E2F1	ARHGEF4
ANXA7	AOF2	NCF2	E2F2	ARID1B
AOC3	APOO	NCOA2	E2F3	ARL11
AOF2	APPBP1	NR0B2	ESR1	ARNT
AP1M1	AQP1	NR1H3	FDXR	ASL
AP3M1	AQP3	NRAS	FHIT	ASPSCR1
APITD1	AQP4	NRIP1	FN1	ASXL1
APOO	AQP9	PDPK1	FOXM1	ATF1
APOOL	ARHGAP11A	PIK3CA	IGBP1	ATIC
AQP1	ARHGAP29	PIK3CB	IKBKB	ATM
ARF6	ARL6IP1	PIK3CD	IKBKG	ATN1
ARHGAP11A	ARMC1	PIK3CG	ILK	ATP11A
ARHGDIA	ARRB1	PIK3R1	IRS1	ATP13A1
ARHGEF1	ASF1B	PIK3R2	ITGA1	ATP13A5
ARHGEF2	ASNS	PIK3R3	ITGA2	ATP8B1
ARID2	ASPM	PIK3R5	ITGA2B	ATRN
ARID4A	ATAD2	PLCG1	ITGA3	AURKA
ARID4B	ATAD5	PLCG2	ITGA4	AXIN2
ARL2	ATP13A4	PRKCA	ITGA6	BARD1
ARL6IP1	AURKA	PRKCB	ITGA8	BAT2
ARPC2	AXUD1	PRKCG	ITGAV	BAT3
ARRB2	BARD1	PRKCZ	ITGB1	BAX
ARRDC1	BEX1	RAF1	ITGB2	BCAR1
ARRDC2	BHLHB2	RARA	ITGB4	BCL10
ASCC3	BIRC5	RARB	LAMA1	BCL11A
ASF1A	BLM	RASSF1	LAMA2	BCL11B
ASPH	BMP2	RASSF5	LAMA3	BCL2
ASPM	BNIP3	RB1	LAMA4	BCL3
ASXL2	BRCA1	RXRA	LAMA5	BCL6
ATAD1	BRIP1	RXRB	LAMB1	BCL7A
ATAD5	BTBD11	RXRG	LAMB2	BCL9
ATF4	BTNL9	SOS1	LAMB3	BCORL1
ATG3	BUB1	SOS2	LAMB4	BCR
ATIC	BUB1B	STK4	LAMC1	BGN
ATOH8	BUB3	TERF2IP	LAMC2	BIRC3
ATP2A2	BXDC2	TGFA	LAMC3	BLM
ATP5G3	C10orf10	TP53	MAX	BMP1
ATP5I	C10orf116		MYC	BMPR1A
ATP5L	C11orf80		NCOA2	BOC
ATP6AP1	C12orf48		NDN	BRAF
ATP6V0C	C13orf3		NFKB1	BRCA1
ATPBD3	C14orf130		NFKBIA	BRCA2
ATR	C14orf145		NOS2	BRD3
ATRX	C14orf58		NR0B2	BRD4
AURKA	C15orf23		NR1H3	BRIP1
AXUD1	C15orf42		NRIP1	BTG1
B3GALNT2	C16orf30		PIAS1	BUB1
BAT2D1	C16orf61		PIAS2	BUB1B
BAZ1A	C17orf75		PIAS3	C10orf137
BBS7	C18orf24		PIAS4	C10orf72
BCAM	C19orf48		PIK3CA	C15orf21
BCAP29	C19orf59		PIK3CB	C1QB
BCAS2	C1orf112		PIK3CD	C1orf2
BCCIP	C1orf116		PIK3CG	C7orf11
BLM	C1orf162		PIK3R1	CAD
BLNK	C1orf176		PIK3R2	CANT1
BLZF1	C20orf72		PIK3R3	CARS
BMS1	C20orf75		PIK3R5	CASC5
BOAT	C20orf94		PTEN	CASP10
BOLA3	C21orf45		PTGS2	CBFA2T3
BRAP	C21orf66		PTK2	CBFB
BRCA1	C3orf14		PXN	CBL
BRCC3	C4BPA		RARB	CBLB
BRIP1	C4orf21		RB1	CBLC
BSG	C4orf31		RELA	CCDC6
BTNL9	C5AR1		RIPK1	CCNB1IP1
BUB1	C5orf34		RXRA	CCND1
BUB1B	C5orf4		RXRB	CCND2
BXDC1	C6orf117		RXRG	CCND3
BXDC2	C6orf167		SGOL1	CCNE1
BZW2	C6orf173		SKP2	CD109
C10orf10	C6orf48		TNFRSF8	CD2
C10orf118	C7		TP53	CD248
C10orf26	C7orf24		TRAF1	CD74
C10orf56	C8orf4		TRAF2	CDC73
C10orf72	C9orf19		TRAF3	CDH1
C11orf1	C9orf61		TRAF4	CDH10
C11orf10	CA2		TRAF5	CDH11
C11orf2	CACNA1A		TRAF6	CDH6
C11orf34	CACNA2D1		XIAP	CDK2
C11orf57	CACNA2D2			CDK4
C11orf59	CALCRL			CDK6
C12orf11	CAND1			CDKN1A
C12orf23	CASC5			CDKN2A
C12orf30	CASP8AP2			CDON
C12orf4	CAT			CDX2
C12orf45	CAV2			CEBPA
C12orf57	CBFA2T2			CHCHD7
C13orf23	CBWD2			CHEK2
C13orf7	CBX1			CHIC2
C14orf11	CBX3			CHL1
C14orf119	CBX5			CHN1
C14orf129	CCBE1			CIC
C14orf2	CCDC14			CIITA
C15orf15	CCDC21			CLCN3
C15orf41	CCDC34			CLSTN3
C15orf5	CCDC5			CLTC
C16orf30	CCDC68			CNKSR2
C16orf61	CCDC69			CNNM4
C17orf75	CCDC77			CNTN1
C18orf19	CCDC99			CNTN3
C18orf21	CCL14			CNTN4
C19orf20	CCNA2			COL11A1
C19orf59	CCNB1			COL1A1
C19orf6	CCNB2			COL1A2
C1QA	CCNE2			COL3A1
C1orf103	CCRL2			COL4A6
C1orf112	CCT2			COL7A1
C1orf131	CCT3			COX6C
C1orf181	CCT4			CPAMD8
C1orf27	CCT5			CPS1
C1orf31	CCT6A			CREB1
C1orf41	CCT8			CREB3L2
C1orf52	CD302			CREBBP
C1orf82	CD34			CRTC3
C1orf9	CD36			CSF1
C20orf149	CD37			CSF3
C20orf7	CD44			CSMD3
C20orf72	CD52			CSPP1
C20orf75	CD55			CTNNB1
C21orf59	CD82			CTNND2
C21orf6	CD93			CYLD
C2orf25	CD97			CYP2A6
C2orf33	CDC2			DAZAP1
C3orf14	CDC20			DBN1
C3orf17	CDC25C			DCHS1
C3orf26	CDC42EP1			DDB2
C4orf30	CDC45L			DDIT3
C4orf33	CDC6			DDX10
C5AR1	CDC7			DDX5
C5orf22	CDCA2			DDX6
C5orf33	CDCA4			DEK
C6orf115	CDCA5			DICER1
C6orf130	CDCA7			DLC1
C6orf203	CDCA7L			DMD
C7orf24	CDCA8			DNASE1L3
C7orf25	CDGAP			DPAGT1
C7orf30	CDH2			DPP10
C7orf36	CDH5			DPYD
C8orf59	CDK2			DSCAML1
C8orf76	CDKAL1			DTNB
C9orf61	CDKN2A			DVL3
C9orf78	CDKN2C			ECT2
CACYBP	CDKN3			EDA
CALM2	CDR1			EFS
CALML4	CEBPD			EGFL6
CALU	CENPA			EGFR
CAMSAP1L1	CENPE			EHBP1
CANX	CENPF			EHMT1
CAPG	CENPI			EIF4A2
CASC5	CENPK			EIF4E
CASK	CENPL			EIF4G1
CBWD2	CENPN			EIF5
CBX3	CENPO			ELAC2
CBX5	CENTD1			ELF4
CBX6	CEP152			ELK4
CBX7	CEP55			ELL
CCAR1	CEP78			ELN
CCBE1	CFD			EML4
CCBL2	CGNL1			EN1
CCDC104	CHAF1B			EP300
CCDC132	CHEK1			EPHA3
CCDC14	CIITA			EPHA4
CCDC16	CKAP2			EPHA7
CCDC45	CKAP2L			EPHB2
CCDC55	CKAP5			EPHB6
CCDC58	CKS1B			EPS15
CCDC59	CKS2			ERBB2
CCDC6	CLDN18			ERCC3
CCDC76	CLDN5			ERCC4
CCDC82	CLEC14A			ERCC5
CCDC90B	CLEC3B			ERCC6
CCDC91	CLIC3			EREG
CCDC99	CLIC5			ERF
CCNA2	CLSPN			ERG
CCNB1	CNIH2			ETS1
CCNB2	CNN2			ETV1
CCNK	CNTN6			ETV4
CCNT1	COCH			ETV5
CCNT2	COLEC12			ETV6
CCT3	COPG2			EVL
CCT6A	CP110			EWSR1
CD14	CPA3			EXT1
CD151	CPSF3			EXT2
CD2AP	CPSF6			F8
CD37	CRIM1			FANCA
CD46	CRIP1			FANCC
CD63	CRMP1			FANCD2
CD81	CROP			FANCE
CD82	CRTAC1			FANCF
CD93	CSE1L			FANCG
CD97	CSF1			FARP1
CDC123	CSF3R			FAS
CDC2L1	CSTF3			FASLG
CDC2L2	CTPS			FBN2
CDC5L	CTSH			FBXW7
CDC6	CUGBP2			FCGR2B
CDC7	CX3CL1			FCRL4
CDC73	CXCL16			FGFR1
CDCA7	CYBRD1			FGFR1OP
CDGAP	CYP2B6			FGFR2
CDH5	CYP2B7P1			FGFR3
CDIPT	CYP4B1			FGFR4
CDK8	CYYR1			FH
CDKN3	DAB2			FHIT
CEBPA	DCC1			FHOD1
CEBPB	DCX			FIGN
CEBPD	DEK			FIP1L1
CEBPZ	DEPDC1			FLCN
CENPF	DEPDC1B			FLI1
CENPJ	DEPDC2			FLJ10404
CENPK	DHX9			FLNA
CENPN	DIAPH3			FLNB
CENTD2	DKC1			FLNC
CEP135	DKFZP686A01247			FLT4
CEP350	DKFZp762E1312			FN1
CEP57	DKK3			FNBP1
CEP63	DLC1			FNDC3B
CFD	DLG7			FOXP1
CFDP1	DLL3			FREM1
CGI-09	DMBT1			FSTL3
CGI-38	DNA2L			FUS
CHCHD3	DNAJC6			G3BP2
CHCHD7	DOK2			GAB1
CHD2	DONSON			GALNS
CHEK1	DPP4			GALNT5
CHMP2A	DPYSL5			GAS7
CHMP4C	DRAM			GATA2
CHMP5	DSN1			GGA1
CHORDC1	DTL			GGA3
CHPT1	DUOX1			GLI3
CHRDL1	DUT			GMPS
CHST12	E2F6			GNAQ
CIR	E2F7			GNAS
CKAP2	ECT2			GOLGA5
CKAP2L	EDG1			GOLGB1
CKAP5	EDG2			GOPC
CKB	EDN1			GPC3
CKLF	EDNRB			GPHN
CKS1B	EGFR			GPNMB
CKS2	EHD2			GRB2
CLCN7	ELAVL4			GRID1
CLDN18	ELOVL4			GRIN2D
CLDN5	EMCN			GRM1
CLDND1	EMP2			GSN
CLEC14A	ENG			GSTP1
CLEC3B	ENO2			HAPLN1
CLIC3	EPAS1			HAS2
CLSPN	ERG			HDAC4
CMTM3	ERH			HDLBP
CNIH4	ESAM			HERPUD1
CNOT2	ESCO2			HIP1
CNOT4	EVA1			HIVEP3
COG5	EXO1			HLF
COL4A2	EZH2			HMGA1
COL6A1	FABP4			HMGA2
COL6A2	FAF1			HNRNPA2B1
COMMD3	FAM107A			HOOK1
COMT	FAM111B			HOOK3
COPB2	FAM20A			HOXA11
COPE	FAM29A			HOXA13
COPS5	FAM33A			HOXA3
COQ5	FAM38A			HOXA9
CORO1A	FAM60A			HOXD11
COX4I1	FAM7A2			HOXD13
COX5A	FANCA			HOXD4
COX6B1	FANCB			HRAS
COX6C	FANCD2			IDH1
COX7A2	FANCL			IDH2
COX7B	FARSB			IGFBP3
COX7C	FBLN1			IGSF22
CPD	FBLN5			IGSF9
CPSF3	FBP1			IKZF1
CREB1	FBXO45			IL1B
CREM	FBXO5			IL1RN
CRIP2	FCN1			IL21R
CRKRS	FCN3			IL6ST
CRNKL1	FEN1			IL7R
CROP	FER1L3			ING1
CRSP2	FGD5			INHBE
CRTAC1	FGFR4			IRF1
CRY2	FGR			IRF4
CSDE1	FHL1			IRS2
CSE1L	FHL5			IRS4
CSF1	FIGF			ISLR
CSF3R	FIGNL1			ITGA9
CSK	FILIP1			ITGAE
CSNK1G2	FKBP3			ITGB2
CSNK1G3	FLI1			ITGB3
CSNK2A1	FLJ13305			ITK
CSNK2A2	FLJ14803			JAK2
CSPP1	FLJ21986			JAK3
CSRP1	FLJ23356			JARID1B
CST3	FLJ34515			JAZF1
CSTB	FLJ40869			JUP
CSTF1	FLRT3			KCNQ5
CSTF3	FLVCR			KDR
CTA-126B4.3	FMO2			KEAP1
CTBP1	FOLR1			KIAA0182
CTBS	FOSL2			KIAA0427
CTDSP1	FOXM1			KIAA0467
CTDSPL2	FRMD4B			KIAA0556
CTNND1	FSD1L			KIAA0664
CTSD	FXR1			KIAA0999
CTSZ	FXYD1			KIAA1549
CUL3	FXYD5			KIAA1618
CX3CL1	FZD3			KIAA1632
CYB5R3	GADD45B			KIAA2022
CYBA	GALNT5			KIAA2099
CYCS	GART			KIF14
CYCSL1	GAS2L3			KIT
CYP27A1	GDAP1			KLF5
CYP4B1	GGH			KLF6
D4ST1	GGTLA4			KLK2
DAP3	GIMAP5			KPNA5
DAPK3	GIMAP6			KRAS
DARS	GIMAP8			KTN1
DBI	GINS1			LAMA1
DBNL	GINS2			LAMA2
DC2	GJA5			LAMA4
DCLRE1A	GKN2			LAMB3
DCTN6	GMNN			LAMC1
DCXR	GMPS			LASP1
DDT	GNAO1			LCK
DDX1	GNG11			LCP1
DDX10	GNG4			LGR6
DDX18	GOLPH2			LHFP
DDX47	GPM6A			LHX4
DDX52	GPR116			LIFR
DEADC1	GPR126			LIG1
DECR1	GPR133			LIG3
DEK	GPR137C			LMO2
DENND3	GPR146			LMO7
DERL1	GPR19			LPP
DHCR24	GPRC5A			LRBA
DHX15	GPSM2			LRP1
DHX32	GPX3			LRP2
DHX36	GRIP1			LRRC7
DHX9	GSN			LRRFIP1
DICER1	GUCY1A3			LYL1
DKC1	Gcom1			LZTS1
DKK3	H2AFY2			MACF1
DLD	H2AFZ			MAD1L1
DLEU1	HBB			MAF
DLG1	HBEGF			MAFB
DLG7	HCK			MAGEE1
DMTF1	HCST			MALT1
DNAJA1	HDAC2			MAML2
DNAJA2	HEG1			MAP1B
DNAJA5	HELLS			MAP2
DNAJB1	HHIP			MAP2K1
DNAJB11	HIG2			MAP2K4
DNAJC10	HIST1H1C			MAP2K7
DNAJC19	HIST1H1E			MAP3K6
DNAJC3	HIST1H2AB			MAPK8IP2
DNAJC7	HIST1H2AC			MAPKBP1
DNM1L	HIST1H2AG			MC1R
DNTTIP2	HIST1H2AK			MCC
DPP7	HIST1H2AL			MCF2L2
DPP9	HIST1H2BC			MCM3AP
DSCR2	HIST1H2BD			MDM2
DSG2	HIST1H2BJ			MDM4
DTL	HIST1H2BL			MDS2
DUOX1	HIST1H2BN			MEN1
DUSP6	HIST1H3A			MET
DYNLL1	HIST1H3B			MICAL1
DYNLT1	HIST1H3C			MINPP1
E2F5	HIST1H3H			MITF
E2F8	HIST1H3I			MKL1
EBAG9	HIST1H4A			MLF1
EBNA1BP2	HIST1H4B			MLH1
ECGF1	HIST1H4C			MLH3
ECT2	HIST1H4H			MLL
EDEM3	HIST1H4L			MLL3
EDF1	HIST2H2AB			MLLT1
EDG5	HIST2H2AC			MLLT10
EEF1A1	HIST3H2A			MLLT11
EEF1B2	HLF			MLLT3
EEF1D	HLTF			MLLT4
EHBP1	HMGB2			MLLT6
EHD1	HMGB3			MMP11
EHD4	HMMR			MMP15
EIF1AX	HN1			MMP2
EIF2A	HNRPR			MN1
EIF2S1	HOOK1			MRE11A
EIF2S2	HOP			MSH2
EIF3S10	HPGD			MSH6
EIF3S6	HPRT1			MSI2
EIF4A2	HSF2			MSN
EIF4B	HSP90AA1			MSR1
EIF4E2	HSPB8			MTCP1
EIF4G3	HSPD1			MTMR3
EIF5B	HTATSF1			MUC1
ELN	HYAL1			MUTYH
EMP1	IBRDC2			MXI1
ENG	ICAM1			MYB
ENOPH1	ID1			MYC
ENOX2	IFITM2			MYCL1
ENY2	IFT81			MYCN
EPAS1	IGF2BP3			MYH11
EPC2	IGFBP4			MYH9
EPR1	IGSF10			MYO1G
EPRS	IL1R1			MYO5C
ERGIC2	IL1RL1			MYST3
ERLIN1	IL32			MYST4
ERO1L	IL33			N4BP2
ESAM	IL4R			NACA
ESCO1	IL7R			NAV3
ESD	ILF2			NBN
ESF1	INA			NCKIPSD
ESSPL	INMT			NCOA1
ETAA1	INTS7			NCOA2
EXO1	IPP			NCOA4
EXOD1	IQGAP3			NCOA6
EXOSC3	ITGA3			NET1
EXOSC8	ITGA5			NF1
EYA3	ITGA8			NF2
EZH2	ITGAM			NFATC1
FAM101B	ITGAX			NFKB2
FAM107A	ITGB3BP			NHS
FAM111B	ITGB6			NID2
FAM129B	ITIH5			NIN
FAM38A	JAM2			NONO
FAM44A	JDP2			NOS3
FAM45A	JUNB			NOTCH1
FAM48A	KCNJ15			NOTCH2
FAM60A	KDR			NPM1
FAM7A2	KIAA0101			NR3C2
FAM91A1	KIAA0286			NR4A3
FAM98A	KIAA1155			NRAS
FANCL	KIAA1333			NRCAM
FARSB	KIAA1344			NRG1
FASN	KIAA1409			NSD1
FAT	KIAA1462			NTRK3
FBLN1	KIAA1524			NUMA1
FBP1	KIAA1586			NUP133
FBXO11	KIAA1794			NUP210
FBXO30	KIAA1799			NUP214
FBXO5	KIF11			NUP98
FBXW7	KIF14			OBSCN
FCGRT	KIF15			ODC1
FCN1	KIF18A			OGG1
FCN3	KIF1A			OLIG2
FGFR4	KIF1C			OR51E1
FGR	KIF20A			OSBP
FHL1	KIF23			OSBPL11
FIGF	KIF2A			P2RY14
FIP1L1	KIF2C			PAFAH1B2
FKBP2	KIF4A			PALB2
FKBP3	KIF5A			PALLD
FKBP8	KIF5C			PAX8
FLJ10120	KIFC1			PBX1
FLJ10241	KLF4			PCDH11X
FLJ13231	KLF9			PCDHA9
FLJ14213	KLHL23			PCDHB15
FLJ14803	KNTC1			PCM1
FLJ20054	KPNA2			PCSK7
FLJ20628	KRT7			PDCD11
FLJ21908	LAMA2			PDE4DIP
FLJ25778	LAMA3			PDGFB
FLJ31818	LAMB2			PDGFRA
FLJ36874	LAMB3			PDGFRB
FLJ37953	LAMC2			PDGFRL
FLJ40869	LAMP3			PER1
FLJ43681	LAPTM4B			PER2
FLNA	LDLR			PHB
FLVCR	LEPR			PHC1
FNDC3A	LEPREL1			PHIP
FOS	LGI3			PICALM
FOSB	LMCD1			PIK3CA
FOSL2	LMNB1			PIK3CB
FOXJ3	LMO7			PIK3R1
FRG1	LOC131873			PIK3R4
FRK	LOC221362			PIM1
FUBP1	LOC283904			PKHD1
FUSIP1	LOC388272			PKNOX1
FUT8	LOC400986			PLA2G2A
FXR1	LOC63920			PLAG1
FXYD1	LOC642234			PLB1
GADD45B	LOC643287			PLCB1
GALNT7	LOC645251			PLCG1
GARS	LOC645478			PLCG2
GAS5	LOC645691			PLD2
GAS6	LOC646903			PLEKHA8
GCC2	LOC647631			PLS3
GEMIN6	LOC648279			PLXNB1
GFM2	LOC648765			PML
GFPT1	LOC648985			PMS1
GGPS1	LOC649841			POT1
GIMAP6	LOC649994			POU2AF1
GINS1	LOC651581			PPARG
GIPC1	LOC652610			PPM1E
GJA5	LOC652726			PPP2CB
GMPS	LOC652900			PPP2R1B
GNAI3	LOC653972			PRCC
GNAS	LOC727793			PRDM16
GNB2	LOC727811			PRF1
GNL2	LOC728198			PRIMA1
GNL3	LOC728844			PRKAR1A
GNPNAT1	LOC728927			PRKD1
GOLGA4	LOC729063			PROS1
GOLGA5	LOC730101			PRPF4B
GOLGA7	LOC730574			PRPS1
GOLPH2	LOC730658			PRRX1
GOLPH3L	LOC731172			PRSS7
GON4L	LOC731241			PSIP1
GORASP2	LOC731265			PTEN
GPAA1	LOC731751			PTPN11
GPATCH2	LOC732313			PTPN12
GPATCH4	LOC732402			PTPN14
GPBP1	LOC732415			PTPRC
GPD2	LOC732450			PTPRD
GPIAP1	LOC732452			PTPRJ
GPM6A	LOC81691			PTPRS
GPR146	LOC84661			PTPRU
GPR18	LOC92755			RABEP1
GPX1	LOH3CR2A			RAD51
GPX3	LPHN2			RAD51L1
GPX4	LPL			RAD54B
GRAP	LRP1			RAD54L
GRIA1	LRPPRC			RAF1
GRINA	LRRC32			RALGDS
GRK5	LRRIQ2			RANBP17
GRK6	LRRK2			RANBP2
GRN	LSM5			RAP1GDS1
GSN	LSM8			RAPH1
GTF2A1	LSP1			RARA
GTF2A2	LST1			RASAL2
GTF2F2	LTBP2			RASGRF2
GTF2H5	LTBP4			RB1
GTF2I	MAD2L1			RB1CC1
GTF3C3	MAD2L2			RBBP8
GTPBP10	MALL			RBM15
GTPBP9	MAMDC2			RECQL4
GUF1	MANEAL			REL
H2AFZ	MAOA			RET
H2BFXP	MAP3K8			RFX2
H6PD	MAPK8			RGL1
HAT1	MARCO			RHOD
HBS1L	MCM2			RHOH
HCK	MCM3			RIF1
HCST	MCM4			RIMS2
HDAC1	MCM6			RNASEL
HDAC2	MCM7			RNF139
HEATR1	MCM8			RNF6
HEG1	MELK			ROBO1
HELZ	MFAP4			ROS1
HIBCH	MFNG			RPGRIP1
HIF1A	MGC45438			RPL22
HIGD1A	MGC57346			RPN1
HINT1	MGLL			RPS10
HIST1H2BC	MIAT			RPS6KA1
HIST1H2BD	MKI67			RPS6KA2
HIST1H2BF	MLF1IP			RPS6KA3
HLA-C	MLLT11			RRAS2
HLA-E	MLPH			RUNX1
HLA-F	MMP19			RUNX1T1
HLTF	MMRN2			SBNO1
HMG2L1	MNAT1			SCARF2
HMGB2	MNDA			SCNN1B
HMGB3	MPHOSPH1			SDHB
HMMR	MPHOSPH9			SDHC
HNRPA1	MPP6			SDHD
HNRPA2B1	MRC2			SEMA4G
HNRPC	MRPS21			SEPHS2
HNRPD	MRPS33			SERPINB1
HNRPH3	MSH2			SET
HPCAL1	MSH6			SETBP1
HPS3	MSI2			SETD2
HRSP12	MSLN			SF3A1
HSD17B14	MSRB3			SFPQ
HSD17B7P2	MTBP			SFRS3
HSP90AA1	MTF2			SFRS6
HSP90AB1	MTHFD1			SH3GL1
HSP90B1	MTHFD2			SH3TC1
HSPA4	MUC1			SIGLEC7
HSPA5	MYADM			SIL
HSPA8	MYBL2			SIX4
HSPA9	MYCT1			SLC22A15
HSPB1	MYEF2			SLC22A18
HSPB8	MYH11			SLC29A1
HSPC148	MYL9			SLC45A3
HSPD1	MYLK			SLC9A2
HSPE1	MYO1C			SMAD2
HSPG2	MYO1F			SMAD3
HSPH1	NAPB			SMAD4
HTATSF1	NAPSA			SMARCA4
HTR2B	NAPSB			SMARCB1
HYAL1	NASP			SMO
HYPK	NBEA			SMTN
IAH1	NBL1			SOCS1
IARS2	NCAPD2			SORBS1
ICAM1	NCAPD3			SORL1
ICAM2	NCAPG			SP110
ICAM4	NCAPG2			SPAG6
ICT1	NCAPH			SPEN
ID1	NCF2			SPTAN1
ID3	NDC80			SPTBN2
IDE	NDRG2			SRC
IDH1	NEDD9			SS18
IER2	NEIL3			SS18L1
IFI6	NEK2			STAB1
IFIH1	NELL1			STARD8
IFNK	NFKBIA			STK11
IFT20	NFKBIZ			SUFU
IK	NME1			SULF2
IL32	NONO			SUZ12
IL3RA	NOSTRIN			SYK
IL4R	NOTCH2			SYNE1
ILF2	NOTCH4			SYNE2
IMPACT	NPR1			SYNPO
ING3	NPR3			Septin 6
INMT	NR3C2			Septin 9
INPP5A	NR4A1			TACC2
INPP5F	NRXN1			TAF1
INTS2	NT5DC3			TAF15
INTU	NTN4			TAF2
IQCG	NUF2			TAL1
IQWD1	NUP107			TAX1BP1
IRF1	NUP155			TBX1
IRF8	NUP205			TCEA1
ITGA3	NUP62CL			TCF12
ITGB2	NUSAP1			TCF3
ITGB3BP	OCIAD2			TCF7L1
ITPKB	OLFML1			TCF7L2
ITPKC	OLR1			TCL1A
IVD	ONECUT2			TCOF1
IVNS1ABP	ORC6L			TCTA
IWS1	OSMR			TEK
JARID1B	OXCT1			TERF1
JDP2	P15RS			TERF2
JOSD3	PAG1			TERT
JTV1	PAICS			TESK1
JUN	PALM2-AKAP2			TET2
JUNB	PALMD			TFE3
JUND	PAPSS2			TFEB
KCNAB2	PARP1			TFG
KCNJ13	PARP2			TFPT
KCNRG	PBK			TFRC
KCTD12	PCNA			TG
KDELR2	PCSK1			TGFBR1
KIAA0157	PCSK2			TGFBR2
KIAA0247	PDGFB			TGM3
KIAA0265	PDK1			THBS3
KIAA0528	PDLIM2			THRAP3
KIAA0586	PDZD2			TIAM1
KIAA0738	PEBP4			TIMELESS
KIAA0776	PECAM1			TLL1
KIAA1754	PER1			TLN1
KIAA1794	PFN2			TLR2
KIF11	PGAP1			TLR9
KIF18A	PGC			TMEM123
KIF21A	PGDS			TMPRSS2
KIF23	PGM2L1			TMPRSS3
KIF2A	PGM5			TNFRSF10B
KIF4A	PHF6			TNFRSF17
KIF5B	PHOSPHO2			TNFRSF25
KLF13	PHTF1			TNFRSF9
KLF2	PHYHIPL			TNN
KLF6	PIGW			TOP1
KLF9	PIGX			TP53
KLHDC3	PLA2G4F			TPM3
KLHL2	PLEKHQ1			TPM4
KLHL8	PLK1			TPR
KNTC1	PLK4			TRIM24
KPNA2	PLLP			TRIM27
KRAS	PLXDC2			TRIM33
KRIT1	PMP22			TRIM36
KRR1	PNN			TRIOBP
KTN1	POLA1			TRIP11
Kua-UEV	POLA2			TSC1
LAMB2	POLE			TSC2
LAPTM4A	POLE2			TSG101
LARP2	POLQ			TSHR
LARP7	PPAP2B			TTL
LARS	PPARG			TTLL3
LASS4	PPAT			UHRF2
LASS6	PPM1E			UQCRC2
LBH	PPP1R15A			USP6
LCAT	PRC1			VAV3
LDHA	PRELP			VEPH1
LDHB	PRF1			VHL
LENG4	PRG4			WAS
LENG8	PRICKLE1			WHSC1
LEO1	PRICKLE2			WHSC1L1
LFNG	PRIM1			WRN
LGALS3BP	PRIM2A			WT1
LGI3	PRKCH			WWOX
LIAS	PRKDC			XDH
LMNA	PROS1			XPA
LMNB1	PROX1			XPC
LOC130773	PRPF39			XRCC3
LOC146517	PRPS1			ZBTB3
LOC147804	PRR11			ZFP64
LOC162073	PRR6			ZFYVE26
LOC162427	PRSS8			ZNF318
LOC196463	PRTFDC1			ZNF331
LOC255783	PSAT1			ZNF384
LOC283904	PSIP1			ZNF521
LOC284361	PSMC3IP			ZNF569
LOC284988	PSMD14
LOC285643	PTBP2
LOC339123	PTGDS
LOC344423	PTGER2
LOC347549	PTGER4
LOC389168	PTGES3
LOC389203	PTGS2
LOC389523	PTPLAD1
LOC390848	PTPRB
LOC391356	PTPRM
LOC400506	PTRF
LOC400963	PTTG1
LOC402100	PXMP2
LOC439992	QKI
LOC440248	RAB11FIP1
LOC440456	RAB27B
LOC440733	RAB39
LOC441034	RAB3IP
LOC441066	RACGAP1
LOC441208	RAD21
LOC441251	RAD51AP1
LOC442132	RAD51C
LOC442590	RAD54B
LOC442609	RAD54L
LOC641311	RAE1
LOC641827	RAMP2
LOC641844	RAMP3
LOC641903	RAN
LOC641977	RASSF2
LOC642105	RBBP4
LOC642277	RBBP7
LOC642599	RBBP8
LOC642773	RBL1
LOC642828	RBM8A
LOC642995	RBMS2
LOC643151	RBMS3
LOC643287	RBPMS
LOC643332	RDHE2
LOC643355	RFC2
LOC643368	RFC3
LOC643491	RFC4
LOC643505	RFC5
LOC643507	RFWD3
LOC643836	RGC32
LOC643873	RHOBTB2
LOC643932	RIF1
LOC643938	RIMS2
LOC644169	RMI1
LOC644522	RNASE1
LOC644749	RNASEH2A
LOC644790	RNF182
LOC644877	ROBO4
LOC644969	ROS1
LOC644972	RP11-11C5.2
LOC644992	RPIP8
LOC645018	RPL39L
LOC645139	RPS15A
LOC645173	RPS6KA2
LOC645320	RPS6KA6
LOC645830	RRAS
LOC645843	RRM1
LOC645859	RRM2
LOC646080	RSPO2
LOC646175	RUVBL1
LOC646363	S100A3
LOC646574	S100A4
LOC646912	S100A8
LOC646973	SAAL1
LOC647030	SAE2
LOC647081	SASS6
LOC647137	SCAMP5
LOC647624	SCARNA23
LOC647653	SCEL
LOC648152	SCG3
LOC648279	SCGB3A1
LOC648282	SCML2
LOC648294	SCN7A
LOC648665	SCN8A
LOC648760	SDPR
LOC649440	SEC11C
LOC649821	SELI
LOC650055	SELP
LOC650283	SELPLG
LOC650327	SEMA3B
LOC650387	SEMA5A
LOC650451	SENP1
LOC650578	SEP3
LOC650832	SERPINA1
LOC650901	SERPING1
LOC651008	SEZ6L
LOC651141	SFTPB
LOC651209	SFTPC
LOC651324	SFTPD
LOC651398	SFTPG
LOC651419	SFXN1
LOC651423	SGMS2
LOC651581	SGOL1
LOC651600	SGOL2
LOC651789	SH2D3C
LOC651921	SH3D19
LOC652028	SHCBP1
LOC652182	SHMT2
LOC652346	SHROOM4
LOC652455	SIRPB1
LOC652458	SKP2
LOC652460	SLC11A1
LOC652522	SLC15A3
LOC652612	SLC16A1
LOC652789	SLC22A3
LOC652838	SLC31A2
LOC653383	SLC34A2
LOC653643	SLC36A4
LOC653758	SLC38A1
LOC653773	SLC39A6
LOC653786	SLC39A8
LOC653884	SLC6A4
LOC653949	SLC9A3R2
LOC653972	SLCO2A1
LOC654029	SLCO2B1
LOC654174	SLIT3
LOC723972	SLPI
LOC727737	SMAD6
LOC727762	SMC2
LOC727792	SMC3
LOC727793	SMC4
LOC727817	SMS
LOC727826	SNAP25
LOC727827	SNHG1
LOC727882	SNHG6
LOC727900	SNORA56
LOC727922	SNORA5A
LOC727929	SNORD15A
LOC727945	SNORD25
LOC728006	SNORD26
LOC728074	SNORD27
LOC728083	SNORD28
LOC728153	SNORD29
LOC728198	SNORD30
LOC728234	SNORD31
LOC728350	SNORD36A
LOC728427	SNORD36B
LOC728549	SNORD47
LOC728625	SNORD52
LOC728661	SNORD54
LOC728729	SNORD56
LOC728754	SNORD57
LOC728779	SNRPD1
LOC728797	SNRPE
LOC728810	SNTB1
LOC728844	SOCS3
LOC728849	SPAG5
LOC728862	SPAST
LOC728871	SPATS2
LOC728908	SPC25
LOC728922	SPI1
LOC728927	SPN
LOC729062	SPOCK2
LOC729074	SPON1
LOC729183	SPRY2
LOC729236	SPRY4
LOC729247	SRPK1
LOC729340	SSX2IP
LOC729411	ST18
LOC729466	ST6GALNAC6
LOC729496	ST8SIA6
LOC729661	STCH
LOC729749	STEAP4
LOC729797	STIL
LOC729812	STMN1
LOC729822	STOM
LOC729852	STRBP
LOC729881	STX11
LOC729927	STXBP5L
LOC730002	STXBP6
LOC730026	SUHW3
LOC730052	SUPT16H
LOC730143	SUSD2
LOC730173	SUV39H2
LOC730228	SUZ12
LOC730258	SV2A
LOC730268	SVEP1
LOC730358	SYNE1
LOC730402	SYNPO2
LOC730461	SYP
LOC730483	SYT11
LOC730508	SYT13
LOC730538	SYT15
LOC730626	TACC1
LOC730754	TACSTD2
LOC730775	TAF9B
LOC730831	TAGLN3
LOC730882	TARDBP
LOC730902	TAS2R50
LOC730953	TBC1D2
LOC730954	TBX2
LOC730972	TBX4
LOC731057	TCF19
LOC731071	TCF21
LOC731125	TCP1
LOC731149	TDP1
LOC731172	TEK
LOC731190	TENC1
LOC731241	TERC
LOC731327	TEX15
LOC731331	TFDP1
LOC731480	TFPI
LOC731481	TGFB1
LOC731503	TGFBR2
LOC731505	TGFBR3
LOC731506	TGM2
LOC731533	THBD
LOC731628	THOC1
LOC731649	TIA1
LOC731688	TIE1
LOC731832	TIMELESS
LOC731879	TIMM8A
LOC731950	TIMP3
LOC731962	TINAGL1
LOC731991	TIPIN
LOC732015	TLR2
LOC732039	TLR3
LOC732053	TMBIM1
LOC732108	TMEFF1
LOC732137	TMEM100
LOC732144	TMEM106C
LOC732227	TMEM48
LOC732233	TMEM97
LOC732247	TMPO
LOC732313	TMPRSS2
LOC732319	TMTC4
LOC732328	TNFRSF1A
LOC732330	TNFSF12-TNFSF13
LOC732402	TNFSF13
LOC732409	TNNC1
LOC732446	TNS1
LOC732457	TNXA
LOC84661	TNXB
LPGAT1	TOP2A
LRP1	TOPBP1
LRRC32	TOX3
LRRC37B	TPSB2
LRRIQ2	TPX2
LRRTM2	TREM1
LSM3	TRIM37
LSM8	TRIM9
LSP1	TRIP13
LSS	TRO
LTBP2	TSC22D3
LTBP3	TSPAN18
LTBP4	TTC3
LTV1	TTK
LXN	TUBA1A
LY6E	TUBB
LYCAT	TUBB2B
M-RIP	TUBB3
MAGED2	TYMS
MAMDC2	UBE2C
MAN1A2	UBE2T
MAN2C1	UBE2V2
MANEA	UCHL1
MAOB	UCK2
MAPKAP1	UHRF1
MAR2	UNC13A
MARCO	UNG
MASTL	UPF3B
MAX	UPK3B
MBD4	USP1
MBTD1	UTRN
MBTPS2	VBP1
MCAM	VDAC3
MCM6	VEPH1
MCM8	VGLL3
MDM4	VIPR1
ME2	VPS45
MELK	VRK1
METAP2	VSIG4
METTL5	VWF
METTL7A	WASF1
MFAP1	WDHD1
MFAP4	WDR54
MFGE8	WDR76
MFNG	WFDC1
MGAT1	WFS1
MGC13057	WHSC1
MGC15523	WIF1
MGC17330	WNK3
MGC35295	WWC2
MGC52110	WWTR1
MGST2	XLKD1
MGST3	XPO1
MID1IP1	XPO5
MIDN	XPOT
MINA	XRCC2
MINPP1	YAP1
MIS12	YEATS4
MKI67	ZBTB16
MKI67IP	ZDHHC13
MLF1IP	ZFP36
MLH1	ZFP36L2
MLLT7	ZIK1
MMRN2	ZNF146
MNAT1	ZNF260
MND1	ZNF292
MPHOSPH1	ZNF322A
MPHOSPH10	ZNF326
MRC2	ZNF566
MRPL13	ZNF594
MRPL18	ZNF643
MRPL21	ZNF66
MRPL22	ZNF711
MRPL3	ZNF713
MRPL35	ZNF749
MRPL39	ZNF776
MRPL51	ZNF780B
MRPS10	ZNF84
MRPS17	ZNF93
MRPS23	ZWILCH
MRPS33	ZWINT
MRPS35	ZYX
MRPS7	hCG_1646157
MSH6	hCG_22804
MT1M
MTBP
MTCP1
MTERF
MTERFD1
MTF2
MTHFD2
MTHFS
MTIF2
MTIF3
MTRF1
MTX3
MVP
MXRA8
MYADM
MYH9
MYL6
MYO1C
MYSM1
NACA
NAGA
NAPA
NAPE-PLD
NAPG
NAPSA
NARG1
NASP
NAT13
NAT5
NBL1
NBN
NCAPG
NCAPH
NCL
NDST1
NDUFA1
NDUFA9
NDUFAB1
NDUFB2
NDUFB3
NDUFB4
NDUFB9
NDUFS4
NEDD8
NET1
NF1
NFE2L3
NFXL1
NGLY1
NGRN
NIF3L1
NIP7
NIPBL
NKG7
NKTR
NLN
NMD3
NME1
NME7
NOC2L
NOL10
NOL7
NOL8
NOLA3
NOTCH1
NPAT
NPM1
NPR1
NR1H2
NR4A1
NRAS
NRD1
NRGN
NRIP1
NSF
NSMCE2
NT5C3
NUCB1
NUCKS1
NUDCD2
NUF2
NUFIP1
NUP153
NUP155
NUP37
NUP88
NUSAP1
NXN
OBFC2B
OCIAD2
OCLM
ODC1
OGDH
OPA1
ORC6L
ORMDL2
OTUD6B
PA2G4
PA2G4P4
PAICS
PAK1
PAK1IP1
PALB2
PAPD1
PAPD5
PAPOLA
PAPOLG
PARK7
PARP2
PBK
PCDHGA5
PCDHGC3
PCID1
PCM1
PCNA
PCNP
PDCD10
PDCL3
PDDC1
PDGFB
PDGFRB
PDHX
PDK1
PDLIM2
PDXK
PEPD
PER1
PERP
PFDN4
PFDN5
PFKL
PGC
PGM5
PGS1
PH-4
PHF14
PHF20L1
PHKA1
PHLDA3
PIGC
PIGU
PIK3C2A
PIN4
PITPNB
PKN1
PLA2G4F
PLAA
PLD3
PLEC1
PLEKHA2
PLEKHA5
PLEKHM1
PLEKHQ1
PLK3
PLLP
PLOD2
PLXND1
PML
PMPCB
PMS1
PMS2
PNN
PNPLA6
PNPT1
PODN
POLA1
POLD3
POLQ
POLR1C
POLR1D
POLR2E
POLR2F
POLR2K
POLR3K
POMP
POR
PPAP2B
PPAT
PPHLN1
PPID
PPIG
PPIL3
PPIL4
PPM1A
PPP1CC
PPP1R12A
PPP1R14A
PPP1R15A
PPP2R4
PPP2R5C
PPWD1
PRC1
PRELP
PREX1
PRIM1
PRKAB2
PRMT3
PRPF3
PRPF38A
PRPF38B
PRPF40A
PRR11
PRRC1
PRUNE
PSCD4
PSENEN
PSIP1
PSMA2
PSMA3
PSMA6
PSMA7
PSMB7
PSMC2
PSMC6
PSMD1
PSMD12
PSMD14
PSMD6
PSMD7
PTGDS
PTGER2
PTGER4
PTMA
PTP4A2
PTPN11
PTPN12
PTRF
PTRH2
PTTG1
PUS7
PWP1
PYCARD
QSCN6
QSER1
QTRTD1
R3HDM1
RAB10
RAB13
RAB1A
RAB22A
RAB40C
RAB6A
RAB7A
RABGGTB
RAD21
RAD50
RAD51AP1
RAD51C
RAMP2
RAMP3
RAN
RANBP9
RARRES2
RARS
RASIP1
RASSF2
RBAK
RBBP6
RBBP8
RBL1
RBM13
RBM14
RBM25
RBM26
RBM28
RBM34
RBM39
RBM41
RBM4B
RBM8A
RBPJ
RBX1
RENBP
RFC4
RFXDC2
RG9MTD2
RGS3
RHBDD2
RHEB
RHOB
RIOK1
RMI1
RMRP
RNASEN
RNF103
RNF122
RNF170
RNF2
RNF6
RNH1
ROCK2
RP11-430N14.1
RP4-747L4.3
RPE
RPL11
RPL12
RPL14L
RPL15
RPL17
RPL19
RPL22
RPL23
RPL23AP7
RPL24
RPL26
RPL27
RPL30
RPL31
RPL31P10
RPL35A
RPL36AL
RPL38
RPL41
RPL6
RPL9
RPS11
RPS12
RPS13
RPS15A
RPS18
RPS20
RPS24
RPS25
RPS27
RPS29
RPS4X
RPS6
RRAD
RRAGB
RRAS
RRM2
RRP15
RSC1A1
RSF1
RSL1D1
RSRC2
RSU1
RTCD1
RUFY2
SAP18
SAR1B
SASS6
SBNO1
SCARNA17
SCARNA2
SCARNA6
SCFD1
SCGB3A1
SCN7A
SCRN3
SCYE1
SCYL1BP1
SDCCAG1
SDPR
SEC14L1
SEC61A2
SEC61G
SEH1L
SELENBP1
SELI
SELM
SELP
SEMA3B
SENP1
SENP2
SEPX1
SET
SETD2
SF3B1
SF3B14
SFRS11
SFRS12
SFRS3
SFRS7
SFTPC
SFTPD
SFXN3
SGOL1
SGPL1
SH2D3C
SH3GLB2
SHANK3
SHFM1
SHROOM4
SIGIRR
SKP2
SLC10A7
SLC11A1
SLC12A4
SLC15A3
SLC16A3
SLC1A1
SLC25A17
SLC25A29
SLC31A1
SLC35A4
SLC35B1
SLC35E2
SLC38A1
SLC39A10
SLC39A6
SLC43A2
SLC44A2
SLC4A1AP
SLC6A4
SLC7A6OS
SLC9A3R2
SLCO2B1
SLIT3
SLK
SLMAP
SLMO2
SLTM
SMAD6
SMARCAD1
SMARCC1
SMC2
SMC3
SMC4
SMC5
SMC6
SMCHD1
SMEK2
SMYD2
SNAP29
SNHG1
SNHG3
SNHG6
SNORA33
SNORA42
SNORA45
SNORA49
SNORA66
SNORA68
SNORA70
SNORD100
SNORD101
SNORD117
SNORD29
SNORD30
SNORD33
SNORD35A
SNORD38B
SNORD46
SNORD47
SNORD48
SNORD4B
SNORD5
SNORD6
SNORD61
SNORD73A
SNORD84
SNRPB2
SNRPD1
SNRPD2
SNRPE
SNRPF
SNRPG
SNW1
SNX17
SNX27
SNX5
SOCS3
SOD1
SOS1
SPIN1
SPN
SPOCK2
SPP1
SPRYD3
SR140
SRFBP1
SRI
SRP72
SRPK1
SRPRB
SSB
SSBP1
SSNA1
SSR1
ST3GAL2
ST6GALNAC6
STARD7
STARD8
STAU1
STAU2
STEAP1
STK11
STK3
STK38
STRBP
STT3A
STX11
STX5
STXBP2
STXBP3
SUCLA2
SUHW3
SUHW4
SUMO1P3
SUMO2
SUPT16H
SURB7
SURF4
SUSD2
SUV39H2
SUV420H1
SUZ12
SVEP1
SYAP1
SYNPO
TAF12
TAF13
TAF15
TAF2
TAF9
TAF9B
TAGLN
TAP2
TAPBP
TARS
TATDN1
TAX1BP1
TAX1BP3
TBC1D10A
TBC1D23
TBCE
TBK1
TBX4
TCEAL8
TCEB1
TCF21
TCF25
TCP1
TEK
TENC1
TETRAN
TFAM
TFB2M
TFDP1
TFE3
TGFB1
TGFBR2
TGFBR3
TGM2
TGS1
THAP1
THAP6
THBD
THEM2
THOC1
THOC2
THOC7
THRAP1
THUMPD3
TIA1
TIE1
TIGD1
TIMM17A
TIMM23
TIMM9
TIMP2
TINAGL1
TINP1
TIPIN
TIPRL
TLK1
TLK2
TLN1
TLOC1
TMCO1
TMED10P
TMED4
TMEM100
TMEM109
TMEM115
TMEM126A
TMEM126B
TMEM127
TMEM14A
TMEM164
TMEM173
TMEM43
TMEM50A
TMEM60
TMEM8
TMF1
TMPRSS2
TMSB10
TMTC3
TNFAIP2
TNFRSF14
TNFRSF1B
TNFSF12-TNFSF13
TNFSF13
TNS1
TNXA
TNXB
TOM1L1
TOM1L2
TOMM7
TOP2A
TOP2B
TOPBP1
TPD52
TPM3
TPR
TPRKB
TPSB2
TPX2
TRADD
TRAPPC6B
TRIM28
TRIM33
TRIM8
TRIOBP
TRIP11
TRPV2
TSC22D3
TSPAN14
TSPAN15
TSPAN18
TSPAN4
TTC1
TTC27
TTC3
TTC35
TTLL5
TUG1
TWF1
TXN
TXNDC1
TXNDC14
TXNDC9
TXNL1
TYMS
U2AF2
UBE1DC1
UBE1L
UBE1L2
UBE2C
UBE2E1
UBE2G1
UBE2I
UBE2M
UBE2R2
UBE2T
UBE2V1
UBE2V2
UBLCP1
UCHL5
UFC1
UFD1L
UGDH
UNC50
UNC84B
UNC93B1
UPF2
UPF3B
UQCRFS1
UQCRQ
URP2
USMG5
USP34
USP48
USP6NL
USP8
UTP14A
VAT1
VBP1
VDP
VEGFB
VIPR1
VPS35
VPS37B
VPS45
VRK1
VTI1B
VWF
WBP11
WBP5
WDHD1
WDR12
WDR13
WDR53
WDR5B
WDR6
WDR61
WDR67
WDR71
WDR75
WDR76
WDR89
WFDC13
WFS1
WIF1
WRN
XAB1
XPOT
XRCC5
XRN1
YIF1A
YIPF5
YIPF6
YLPM1
YME1L1
YTHDF3
YWHAE
YWHAQ
YY1AP1
ZADH1
ZBED5
ZBTB16
ZBTB33
ZBTB41
ZC3H11A
ZC3H13
ZC3H14
ZC3H15
ZC3H8
ZCCHC6
ZCCHC7
ZCCHC9
ZCD1
ZDHHC6
ZFAND1
ZFP36L2
ZFP62
ZNF121
ZNF131
ZNF146
ZNF148
ZNF226
ZNF260
ZNF289
ZNF326
ZNF480
ZNF507
ZNF518
ZNF585A
ZNF638
ZNF75A
ZNF761
ZNF789
ZNF92
ZNF93
ZRANB2
ZRF1
ZRSR2
ZYX
hCG_1640785
hCG_1651160
hCG_1778643
hCG_1789710
hCG_1790262
hCG_1795560
hCG_1983058
hCG_2004593
hCG_2015956
hCG_22804
hCG_26523
hCG_31916
