# Supplementary material for: Identification of Lung-Cancer-Related Genes with the Shortest Path Approach in a Protein-Protein Interaction Network
Source: Biomed Res Int. 2013 May 22;2013:267375. doi: 10.1155/2013/267375 (PMC3674655; doi:10.1155/2013/267375)
Supplement: Supplementary file 1 — Additional file S1: This file contains two sheets. The first one shows 54 NSCLC related genes compiled from KEGG and corresponding Ensembl protein ID. The second one shows 84 SCLC related genes compiled from KEGG and corresponding Ensembl protein ID. Additional file S2: This file contains four sheets. The first one shows the 1918 overexpressed probes in NSCLC compared with normal tissues identified from gene expression array GSE40275. The second one shows the 2243 downexpressed probes in NSCLC. The third one shows the 819 overexpressed probes in SCLC. The fourth one shows the 820 downexpressed probes in SCLC. Additional file S3: This file contains five gene sets. The first one is the total 1825 differentially expressed NSCLC genes corresponding to the differentially expressed probes listed in Additional file S2. The second one is the total 1063 SCLC differentially expressed genes corresponding to the differentially expressed probes listed in Additional file S2. The third one is the 25 NSCLC shortest path genes. The fourth one is the 38 SCLC shortest path genes. The fifth one is the 742 cancer genes. Additional file S4: 1711 shortest paths between 54 NSCLC genes and 3916 shortest paths between 84 SCLC genes. Additional file S5: This file contains two sheets. The first one shows the 114 NSCLC shortest path genes with p-value. The second one shows the 161 SCLC shortest path genes with p-value. Additional file S6: This file contains two sheets. The first one shows the GO enrichment result of 25 NSCLC shortest path genes. The second one shows the GO enrichment result of 38 SCLC shortest path genes. [file 267375.f1.zip › Additional file/Additional file S5.xlsx]

## Sheet: NSCLC shortest path genes
Ensembl protein ID	gene symbl	random great than occurrence time	shortest path occurrence time	pvalue
ENSP00000206249	ESR1	0	369	0
ENSP00000293195	FDXR	0	58	0
ENSP00000327213	NRIP1	0	111	0
ENSP00000342470	NR1H3	0	188	0
ENSP00000363868	ABCA1	0	226	0
ENSP00000262995	GAB1	1	2	0.000501002
ENSP00000289473	NCF1	1	58	0.000501002
ENSP00000308176	BTK	2	58	0.001002
ENSP00000304895	IRS1	2	160	0.001002
ENSP00000254227	NR0B2	3	140	0.00150301
ENSP00000335153	HSP90AA1	3	186	0.00150301
ENSP00000268035	IGF1R	4	58	0.00200401
ENSP00000254066	RARA	11	2	0.00551102
ENSP00000399968	NCOA2	12	108	0.00601202
ENSP00000300086	TERF2IP	35	45	0.0175351
ENSP00000239223	DUSP1	39	12	0.0195391
ENSP00000224337	BLNK	52	58	0.0260521
ENSP00000362082	CCND3	52	1	0.0260521
ENSP00000356505	NCF2	72	58	0.0360721
ENSP00000264122	CBLB	73	3	0.0365731
ENSP00000282561	GJA1	73	65	0.0365731
ENSP00000367830	PRKCZ	73	17	0.0365731
ENSP00000260270	FDX1	75	4	0.0375752
ENSP00000268053	CYP11A1	93	4	0.0465932
ENSP00000354119	LAT	95	5	0.0475952
ENSP00000231509	NR3C1	103	31	0.0516032
ENSP00000236850	APOA1	114	24	0.0571142
ENSP00000222005	CDC37	138	6	0.0691383
ENSP00000274376	RASA1	146	8	0.0731463
ENSP00000348827	THRB	152	19	0.0761523
ENSP00000361125	VEGFA	153	58	0.0766533
ENSP00000356248	PTPN7	154	2	0.0771543
ENSP00000254942	TERF2	178	45	0.0891784
ENSP00000362690	NR5A1	179	4	0.0896794
ENSP00000287727	ZFYVE9	191	54	0.0956914
ENSP00000361021	PTEN	211	71	0.105711
ENSP00000265335	RAD50	216	45	0.108216
ENSP00000228872	CDKN1B	221	55	0.110721
ENSP00000233242	APOB	229	24	0.114729
ENSP00000320940	NCOA1	251	19	0.125752
ENSP00000249071	RAC2	263	1	0.131764
ENSP00000252444	LDLR	353	24	0.176854
ENSP00000263923	KDR	354	12	0.177355
ENSP00000353059	APAF1	362	56	0.181363
ENSP00000287820	PPARG	379	13	0.18988
ENSP00000347858	XIAP	391	2	0.195892
ENSP00000348986	RP11-889I17.1	391	78	0.195892
ENSP00000311032	CASP3	425	1	0.212926
ENSP00000325690	CARM1	435	5	0.217936
ENSP00000350720	SMARCA4	447	16	0.223948
ENSP00000340944	PTPN11	451	37	0.225952
ENSP00000223023	WASL	507	29	0.254008
ENSP00000320935	SLC2A4	522	1	0.261523
ENSP00000289779	F11R	524	1	0.262525
ENSP00000264867	PPARGC1A	546	13	0.273547
ENSP00000281537	TJP1	547	1	0.274048
ENSP00000216160	TAB1	553	1	0.277054
ENSP00000365016	IRS2	565	1	0.283066
ENSP00000363921	PARD3	639	1	0.32014
ENSP00000278568	PAK1	674	8	0.337675
ENSP00000219255	PARD6A	677	1	0.339178
ENSP00000364898	SYK	678	4	0.339679
ENSP00000252486	APOE	679	24	0.34018
ENSP00000342793	PLD1	722	43	0.361723
ENSP00000338018	HIF1A	731	83	0.366232
ENSP00000212015	SIRT1	760	28	0.380762
ENSP00000313829	KHDRBS1	769	1	0.385271
ENSP00000350941	SRC	787	113	0.394289
ENSP00000353483	MAPK8	869	57	0.435371
ENSP00000309503	YWHAZ	886	15	0.443888
ENSP00000350283	BRCA1	923	51	0.462425
ENSP00000343204	JAK1	924	2	0.462926
ENSP00000417281	MDM2	989	112	0.495491
ENSP00000332973	SMAD3	989	18	0.495491
ENSP00000360683	PTPN1	1056	5	0.529058
ENSP00000401303	SHC1	1084	32	0.543086
ENSP00000226574	NFKB1	1093	5	0.547595
ENSP00000219476	TSC2	1112	2	0.557114
ENSP00000314458	CDC42	1148	57	0.57515
ENSP00000367207	MYC	1151	23	0.576653
ENSP00000363822	AR	1169	8	0.585671
ENSP00000329357	SP1	1212	41	0.607214
ENSP00000364893	ARHGEF7	1227	7	0.614729
ENSP00000284981	APP	1283	24	0.642786
ENSP00000371138	FKBP1A	1287	3	0.64479
ENSP00000244741	CDKN1A	1288	8	0.645291
ENSP00000302269	VAV1	1293	18	0.647796
ENSP00000364133	TGFBR1	1361	3	0.681864
ENSP00000267859	BNIP2	1365	5	0.683868
ENSP00000288986	NCK1	1370	1	0.686373
ENSP00000348461	RAC1	1380	72	0.691383
ENSP00000326366	PSEN1	1383	24	0.692886
ENSP00000303830	INSR	1388	7	0.695391
ENSP00000262160	SMAD2	1423	36	0.712926
ENSP00000261799	PDGFRB	1507	14	0.75501
ENSP00000354558	MTOR	1507	3	0.75501
ENSP00000269321	ARHGDIA	1555	1	0.779058
ENSP00000274026	CCNA2	1558	1	0.780561
ENSP00000341189	PTK2	1579	11	0.791082
ENSP00000300574	CRK	1691	1	0.847194
ENSP00000362649	HDAC1	1696	7	0.849699
ENSP00000162330	BCAR1	1737	1	0.87024
ENSP00000268182	IQGAP1	1763	1	0.883267
ENSP00000354394	STAT1	1820	3	0.911824
ENSP00000264033	CBL	1833	13	0.918337
ENSP00000329623	BCL2	1847	15	0.925351
ENSP00000384273	RELA	1861	5	0.932365
ENSP00000316840		1867	1	0.935371
ENSP00000371067	JAK2	1888	3	0.945892
ENSP00000344456	CTNNB1	1892	76	0.947896
ENSP00000344818	UBC	1967	93	0.985471
ENSP00000263253	EP300	1977	72	0.990481
ENSP00000324806	GSK3B	1980	2	0.991984
ENSP00000264657	STAT3	1989	24	0.996493

## Sheet: SCLC shortest path genes
Ensembl protein ID	gene symbl	random great than occurrence time	shortest path occurrence time	pvalue
ENSP00000380227	ITGA4	0	724	0
ENSP00000379823	COL4A3	0	88	0
ENSP00000363868	ABCA1	0	346	0
ENSP00000348380	CYP20A1	0	88	0
ENSP00000342470	NR1H3	0	264	0
ENSP00000342307	FOXM1	0	412	0
ENSP00000340937	COL17A1	0	269	0
ENSP00000331902	COL4A5	0	88	0
ENSP00000327213	NRIP1	0	171	0
ENSP00000256442	CCNB1	0	269	0
ENSP00000228307	PXN	0	724	0
ENSP00000200181	ITGB4	0	269	0
ENSP00000282588	ITGA1	1	174	0.00050025
ENSP00000206249	ESR1	2	568	0.0010005
ENSP00000293195	FDXR	3	88	0.00150075
ENSP00000278916	CHEK1	3	231	0.00150075
ENSP00000321656	CDC25C	6	340	0.0030015
ENSP00000304895	IRS1	6	244	0.0030015
ENSP00000262017	C17orf57	7	88	0.00350175
ENSP00000348784	IGBP1	9	174	0.00450225
ENSP00000254227	NR0B2	13	220	0.00650325
ENSP00000299421	ILK	17	170	0.00850425
ENSP00000263932	TNFRSF8	18	30	0.0090045
ENSP00000332643	NDN	20	21	0.010005
ENSP00000312435	DAG1	21	171	0.0105053
ENSP00000264122	CBLB	21	15	0.0105053
ENSP00000220764	DECR1	24	88	0.012006
ENSP00000361359	CD40	30	157	0.0150075
ENSP00000274026	CCNA2	35	109	0.0175088
ENSP00000267169	DIABLO	36	26	0.018009
ENSP00000404503	BBC3	39	3	0.0195098
ENSP00000367316	ITGA8	45	20	0.0225113
ENSP00000399968	NCOA2	46	162	0.0230115
ENSP00000300574	CRK	56	112	0.028014
ENSP00000303242	ITGB2	63	20	0.0315158
ENSP00000263753	SGOL1	63	174	0.0315158
ENSP00000259808	RIPK1	64	119	0.032016
ENSP00000362082	CCND3	97	2	0.0485243
ENSP00000254066	RARA	101	1	0.0505253
ENSP00000418447	PPP2CA	113	174	0.0565283
ENSP00000341940	CAV3	113	33	0.0565283
ENSP00000268058	PML	115	1	0.0575288
ENSP00000172229	NGFR	117	88	0.0585293
ENSP00000363827	HSPG2	134	28	0.0670335
ENSP00000356505	NCF2	137	88	0.0685343
ENSP00000303706	CDC25A	137	6	0.0685343
ENSP00000361125	VEGFA	142	110	0.0710355
ENSP00000260270	FDX1	142	4	0.0710355
ENSP00000216160	TAB1	158	36	0.0790395
ENSP00000236850	APOA1	171	68	0.0855428
ENSP00000316840		199	289	0.0995498
ENSP00000268053	CYP11A1	200	4	0.10005
ENSP00000355153	CDKN2A	202	48	0.101051
ENSP00000221930	TGFB1	203	93	0.101551
ENSP00000303634	LRP8	246	4	0.123062
ENSP00000354923	DMD	266	3	0.133067
ENSP00000233242	APOB	266	64	0.133067
ENSP00000311032	CASP3	275	35	0.137569
ENSP00000189444	NFKB2	277	6	0.138569
ENSP00000281708	FBXW7	286	13	0.143072
ENSP00000306043		289	166	0.144572
ENSP00000362690	NR5A1	290	4	0.145073
ENSP00000298552	TSC1	297	9	0.148574
ENSP00000287727	ZFYVE9	305	84	0.152576
ENSP00000350311		323	2	0.161581
ENSP00000381107		333	13	0.166583
ENSP00000325690	CARM1	350	19	0.175088
ENSP00000269485	TNFRSF11A	359	58	0.17959
ENSP00000351486	NTRK1	363	19	0.181591
ENSP00000227667	APOC3	375	4	0.187594
ENSP00000372023	CHEK2	384	95	0.192096
ENSP00000264832	ICAM1	405	20	0.202601
ENSP00000268035	IGF1R	418	46	0.209105
ENSP00000355759	PARP1	426	6	0.213107
ENSP00000392423	RELN	430	4	0.215108
ENSP00000252444	LDLR	442	64	0.221111
ENSP00000263253	EP300	445	547	0.222611
ENSP00000376076	SUMO1	454	34	0.227114
ENSP00000287820	PPARG	472	26	0.236118
ENSP00000300093	PLK1	473	174	0.236618
ENSP00000262160	SMAD2	485	192	0.242621
ENSP00000348827	THRB	503	9	0.251626
ENSP00000361275	PLK3	510	55	0.255128
ENSP00000297494	NOS3	537	33	0.268634
ENSP00000326804	CUL1	543	15	0.271636
ENSP00000226218	AC002094.1	549	4	0.274637
ENSP00000312995	CLSPN	555	43	0.277639
ENSP00000350511		562	3	0.281141
ENSP00000255465	CCNA1	597	59	0.298649
ENSP00000231487	SKP1	609	9	0.304652
ENSP00000231509	NR3C1	640	19	0.32016
ENSP00000244741	CDKN1A	682	62	0.341171
ENSP00000264867	PPARGC1A	690	26	0.345173
ENSP00000223095	SERPINE1	722	4	0.361181
ENSP00000343204	JAK1	724	10	0.362181
ENSP00000350720	SMARCA4	775	4	0.387694
ENSP00000262367	CREBBP	789	90	0.394697
ENSP00000361850	PLAU	790	4	0.395198
ENSP00000359206	BTRC	803	61	0.401701
ENSP00000341551	SMAD4	835	88	0.417709
ENSP00000324897	UBE2I	855	83	0.427714
ENSP00000267996	TPM1	864	3	0.432216
ENSP00000258743	IL6	875	40	0.437719
ENSP00000354394	STAT1	880	59	0.44022
ENSP00000162749	TNFRSF1A	909	23	0.454727
ENSP00000348986	RP11-889I17.1	920	105	0.46023
ENSP00000252486	APOE	934	68	0.467234
ENSP00000353483	MAPK8	980	127	0.490245
ENSP00000263923	KDR	981	4	0.490745
ENSP00000358997	IRAK1	993	9	0.496748
ENSP00000364898	SYK	1000	1	0.50025
ENSP00000365016	IRS2	1042	1	0.521261
ENSP00000211998	VCL	1045	3	0.522761
ENSP00000332973	SMAD3	1047	38	0.523762
ENSP00000320940	NCOA1	1053	9	0.526763
ENSP00000351273	CASP8	1057	4	0.528764
ENSP00000263341	IL1B	1087	15	0.543772
ENSP00000306512	IL8	1149	1	0.574787
ENSP00000309103	BAD	1192	49	0.596298
ENSP00000301633	BIRC5	1251	3	0.625813
ENSP00000350941	SRC	1262	198	0.631316
ENSP00000212015	SIRT1	1303	26	0.651826
ENSP00000338799	IL6ST	1362	3	0.681341
ENSP00000362649	HDAC1	1373	85	0.686843
ENSP00000329357	SP1	1375	91	0.687844
ENSP00000350283	BRCA1	1377	49	0.688844
ENSP00000401303	SHC1	1390	53	0.695348
ENSP00000344352	ATF3	1470	11	0.735368
ENSP00000265171	EGF	1496	4	0.748374
ENSP00000338018	HIF1A	1503	96	0.751876
ENSP00000360266	JUN	1514	34	0.757379
ENSP00000364133	TGFBR1	1556	7	0.778389
ENSP00000306245	FOS	1558	2	0.77939
ENSP00000346300	CRKL	1565	1	0.782891
ENSP00000284981	APP	1603	36	0.801901
ENSP00000371067	JAK2	1608	31	0.804402
ENSP00000363822	AR	1683	8	0.841921
ENSP00000326366	PSEN1	1683	36	0.841921
ENSP00000335153	HSP90AA1	1722	10	0.861431
ENSP00000371138	FKBP1A	1723	3	0.861931
ENSP00000309845	HRAS	1728	6	0.864432
ENSP00000215832	MAPK1	1740	24	0.870435
ENSP00000384675	SOS1	1766	2	0.883442
ENSP00000344818	UBC	1798	372	0.89945
ENSP00000417281	MDM2	1803	132	0.901951
ENSP00000354558	MTOR	1819	3	0.909955
ENSP00000303830	INSR	1837	6	0.918959
ENSP00000348461	RAC1	1842	93	0.921461
ENSP00000244007	PLCG1	1856	4	0.928464
ENSP00000261799	PDGFRB	1896	3	0.948474
ENSP00000251849	RAF1	1914	1	0.957479
ENSP00000387699	CREB1	1917	5	0.958979
ENSP00000264657	STAT3	1918	166	0.95948
ENSP00000339007	GRB2	1922	237	0.961481
ENSP00000360683	PTPN1	1925	1	0.962981
ENSP00000340944	PTPN11	1952	4	0.976488
ENSP00000302269	VAV1	1992	6	0.996498
ENSP00000275493	EGFR	1995	155	0.997999
ENSP00000344456	CTNNB1	1996	84	0.998499
ENSP00000269571	ERBB2	1997	17	0.998999
ENSP00000264033	CBL	1999	5	1
