# Supplementary material for: Identification of Lung-Cancer-Related Genes with the Shortest Path Approach in a Protein-Protein Interaction Network
Source: Biomed Res Int. 2013 May 22;2013:267375. doi: 10.1155/2013/267375 (PMC3674655; doi:10.1155/2013/267375)
Supplement: Supplementary file 1 — Additional file S1: This file contains two sheets. The first one shows 54 NSCLC related genes compiled from KEGG and corresponding Ensembl protein ID. The second one shows 84 SCLC related genes compiled from KEGG and corresponding Ensembl protein ID. Additional file S2: This file contains four sheets. The first one shows the 1918 overexpressed probes in NSCLC compared with normal tissues identified from gene expression array GSE40275. The second one shows the 2243 downexpressed probes in NSCLC. The third one shows the 819 overexpressed probes in SCLC. The fourth one shows the 820 downexpressed probes in SCLC. Additional file S3: This file contains five gene sets. The first one is the total 1825 differentially expressed NSCLC genes corresponding to the differentially expressed probes listed in Additional file S2. The second one is the total 1063 SCLC differentially expressed genes corresponding to the differentially expressed probes listed in Additional file S2. The third one is the 25 NSCLC shortest path genes. The fourth one is the 38 SCLC shortest path genes. The fifth one is the 742 cancer genes. Additional file S4: 1711 shortest paths between 54 NSCLC genes and 3916 shortest paths between 84 SCLC genes. Additional file S5: This file contains two sheets. The first one shows the 114 NSCLC shortest path genes with p-value. The second one shows the 161 SCLC shortest path genes with p-value. Additional file S6: This file contains two sheets. The first one shows the GO enrichment result of 25 NSCLC shortest path genes. The second one shows the GO enrichment result of 38 SCLC shortest path genes. [file 267375.f1.zip › Additional file/Additional file S6.xlsx]

## Sheet: NSCLC
Category	Term	Count	percentage	P-Value	Benjamini adjust p-value
GOTERM_BP_FAT	intracellular signaling cascade	14	56	3.4e-08	2.2e-05
GOTERM_CC_FAT	membrane raft	6	24	1.7e-06	0.0002
GOTERM_BP_FAT	response to hormone stimulus	7	28	3.4e-05	0.011
GOTERM_MF_FAT	ligand-dependent nuclear receptor activity	4	16	0.00016	0.012
GOTERM_BP_FAT	positive regulation of macromolecule metabolic process	9	36	7.4e-05	0.012
GOTERM_BP_FAT	response to endogenous stimulus	7	28	5.9e-05	0.013
GOTERM_MF_FAT	steroid hormone receptor activity	4	16	9.7e-05	0.014
GOTERM_MF_FAT	enzyme binding	7	28	0.0003	0.014
GOTERM_BP_FAT	steroid hormone receptor signaling pathway	4	16	0.00014	0.019
GOTERM_BP_FAT	response to organic substance	8	32	0.00018	0.02
GOTERM_MF_FAT	electron carrier activity	5	20	0.00066	0.024
GOTERM_BP_FAT	intracellular receptor-mediated signaling pathway	4	16	0.0003	0.028
GOTERM_MF_FAT	lipid binding	6	24	0.0012	0.034
GOTERM_BP_FAT	cholesterol metabolic process	4	16	0.00056	0.045

## Sheet: SCLC
Category	Term	Count	percentage	P-Value	Benjamini adjust p-value
GOTERM_CC_FAT	receptor complex	7	18.4	3e-07	4e-05
GOTERM_CC_FAT	integrin complex	5	13.2	6.4e-07	4.3e-05
GOTERM_BP_FAT	cell-substrate adhesion	7	18.4	1.7e-07	6.8e-05
GOTERM_BP_FAT	cell-matrix adhesion	7	18.4	9.5e-08	7.7e-05
GOTERM_BP_FAT	integrin-mediated signaling pathway	6	15.8	9.2e-07	0.00025
GOTERM_BP_FAT	positive regulation of catalytic activity	10	26.3	4.9e-06	0.001
GOTERM_BP_FAT	positive regulation of molecular function	10	26.3	1.3e-05	0.0021
GOTERM_CC_FAT	perikaryon	4	10.5	5e-05	0.0022
GOTERM_BP_FAT	positive regulation of macromolecule metabolic process	11	28.9	4.2e-05	0.0057
GOTERM_BP_FAT	regulation of cell proliferation	10	26.3	0.00013	0.015
GOTERM_BP_FAT	regulation of phosphorylation	8	21.1	0.00016	0.016
GOTERM_BP_FAT	intracellular signaling cascade	12	31.6	0.00022	0.017
GOTERM_BP_FAT	regulation of phosphorus metabolic process	8	21.1	0.0002	0.018
GOTERM_BP_FAT	regulation of phosphate metabolic process	8	21.1	0.0002	0.018
GOTERM_BP_FAT	regulation of transferase activity	7	18.4	0.00034	0.02
GOTERM_BP_FAT	regulation of kinase activity	7	18.4	0.00028	0.02
GOTERM_BP_FAT	biological adhesion	9	23.7	0.00034	0.021
GOTERM_BP_FAT	cell adhesion	9	23.7	0.00033	0.022
GOTERM_CC_FAT	cell soma	5	13.2	0.00069	0.022
GOTERM_CC_FAT	basement membrane	4	10.5	0.00087	0.023
GOTERM_CC_FAT	plasma membrane part	14	36.8	0.0011	0.023
GOTERM_CC_FAT	integral to plasma membrane	10	26.3	0.0015	0.029
GOTERM_CC_FAT	intrinsic to plasma membrane	10	26.3	0.0018	0.029
GOTERM_CC_FAT	extracellular matrix part	4	10.5	0.0028	0.04
GOTERM_BP_FAT	positive regulation of signal transduction	6	15.8	0.0009	0.048
